# Supplementary material for: Metabolomics analysis of baicalin on ovalbumin-sensitized allergic rhinitis rats
Source: R Soc Open Sci. 2019 Feb 20;6(2):181081. doi: 10.1098/rsos.181081 (PMC6408364; doi:10.1098/rsos.181081)
Supplement: ESI(+)metabolites-all [file rsos181081supp4.xls]

## Sheet: Sheet1
Ret. Time	m/z	Control1	Control2	Control3	Control4	Control5	Control6	Control7	Control8	Control9	Control10	Model1	Model2	Model3	Model4	Model5	Model6	Model7	Model8	Model9	Model10	Baicalin1	Baicalin2	Baicalin3	Baicalin4	Baicalin5	Baicalin6	Baicalin7	Baicalin8	Baicalin9	Baicalin10	QC1	QC2	QC3	QC4	QC5	QC6
0.6738	702.861	0.5178	0.7348	0.7256	0.7316	0.4308	0.6461	0.7216	0.5952	0.6379	0.6443	0.7607	0.536	0.6633	0.5695	0.641	0.616	0.7323	0.585	0.638	0.6444	0.5818	0.6883	0.7135	0.6976	0.4914	0.645	0.7317	0.6074	0.6415	0.6479	0.6668	0.6312	0.6916	0.5646	0.6322	0.6503
0.6768	566.887	0.5957	0.7345	0.7055	0.8005	0.5789	0.767	0.7503	0.7864	0.7149	0.722	0.925	0.7596	0.7089	0.7895	0.7621	0.8139	0.6507	0.9429	0.7941	0.802	0.6819	0.7445	0.7099	0.8057	0.6348	0.7868	0.7325	0.8471	0.7389	0.7462	0.6535	0.5742	0.6639	0.6549	0.6303	0.6483
0.6774	770.848	0.5343	0.4707	0.5107	0.5753	0.3371	0.5326	0.528	0.4299	0.4898	0.4947	0.4221	0.5219	0.5248	0.4678	0.4226	0.5507	0.5298	0.5851	0.5031	0.5081	0.5087	0.486	0.5168	0.5536	0.3642	0.5427	0.5338	0.4814	0.4959	0.5008	0.5058	0.4874	0.5184	0.4823	0.4935	0.5076
0.6817	498.899	0.6521	0.9317	0.8314	0.9427	0.6925	0.952	0.9356	0.8703	0.851	0.8595	0.9678	0.8411	0.9311	0.8835	0.9637	1.0475	0.9771	0.9669	0.9473	0.9568	0.7351	0.9135	0.8608	0.937	0.7727	0.9861	0.9557	0.9174	0.8801	0.8889	0.8376	0.7966	0.8486	0.8435	0.8233	0.8468
0.6818	301.14	0.8384	0.9703	0.8851	0.9	0.9061	0.8513	0.8976	0.8788	0.891	0.8999	0.7497	0.6673	0.7766	0.6495	0.6423	0.692	0.7207	0.7768	0.7094	0.7165	0.8202	0.8986	0.8622	0.8451	0.8518	0.8193	0.8616	0.874	0.85	0.8585	0.6471	0.6872	0.6916	0.6284	0.6569	0.6758
0.6821	430.913	1.4717	1.5701	1.547	1.7639	1.9158	1.5125	1.6035	1.2727	1.5822	1.598	1.8099	1.6579	1.7383	1.7478	1.8007	1.9645	1.801	1.8583	1.7973	1.8153	1.5645	1.6001	1.6031	1.7774	1.9149	1.6432	1.6702	1.4582	1.6453	1.6617	1.3847	1.5763	1.2863	1.4942	1.421	1.4617
0.6843	362.925	0.9565	1.2381	1.1925	1.3238	0.9357	1.1705	1.177	1.2379	1.154	1.1655	1.3481	1.2256	1.3391	1.2119	1.3373	1.4046	1.3127	1.3829	1.3203	1.3335	1.0602	1.2411	1.2355	1.3085	1.0531	1.2422	1.2236	1.3069	1.2024	1.2144	1.1217	1.1974	1.084	1.1085	1.1166	1.1486
0.6847	708.814	0.5195	0.6612	0.576	0.6463	0.7088	0.592	0.6045	0.5116	0.6025	0.6085	0.6382	0.6184	0.5913	0.5233	0.6177	0.6595	0.652	0.6683	0.6211	0.6273	0.5521	0.6537	0.5828	0.6214	0.696	0.6153	0.6228	0.5655	0.6105	0.6166	0.6125	0.5641	0.5631	0.542	0.5647	0.5809
0.6849	776.803	0.4639	0.5283	0.5023	0.4965	0.3924	0.5447	0.5217	0.5396	0.4987	0.5037	0.4551	0.4579	0.4657	0.4287	0.5067	0.5863	0.3469	0.2918	0.4424	0.4468	0.464	0.5132	0.4956	0.4842	0.4277	0.5609	0.4824	0.488	0.4872	0.4921	0.4609	0.4567	0.5537	0.4365	0.4722	0.4857
0.6861	294.938	0.1763	0.21	0.2126	0.2107	0.1843	0.1638	0.1999	0.1963	0.1942	0.1962	0.2791	0.1831	0.2072	0.2242	0.2551	0.2537	0.2238	0.2207	0.2309	0.2332	0.2032	0.2043	0.2123	0.2162	0.2053	0.1884	0.208	0.2076	0.2046	0.2066	0.1998	0.2363	0.2397	0.2783	0.2361	0.2429
0.6877	986.723	0.1663	0.1717	0.1744	0.1702	0.0997	0.1443	0.1509	0.1435	0.1526	0.1542	0.1262	0.1461	0.1812	0.1597	0.1026	0.1615	0.0951	0.1703	0.1428	0.1443	0.157	0.1661	0.177	0.1692	0.1019	0.1502	0.1382	0.1541	0.151	0.1525	0.1713	0.1196	0.1645	0.1839	0.1582	0.1628
0.688	606.835	0.131	0.1091	0.1097	0.151	0.145	0.1142	0.0967	0.1095	0.1208	0.122	0.0919	0.1196	0.116	0.1596	0.1082	0.1462	0.127	0.1377	0.1258	0.127	0.1218	0.1123	0.1118	0.1547	0.1377	0.1235	0.1054	0.1196	0.1227	0.1239	0.2493	0.2044	0.2118	0.2265	0.2208	0.2271
0.6887	640.829	0.7284	0.7807	0.6536	0.8048	0.9148	0.7769	0.7218	0.6088	0.7487	0.7562	0.8187	0.7112	0.7571	0.7852	0.8499	0.8039	0.7745	0.6436	0.768	0.7757	0.7549	0.7671	0.683	0.8079	0.9118	0.7917	0.7426	0.6332	0.7578	0.7653	0.7746	0.6542	0.8023	0.7382	0.7349	0.756
0.6889	442.825	0.4269	0.2753	0.4884	0.4464	0.48	0.4821	0.4591	0.3681	0.4283	0.4326	0.7102	0.6057	0.5463	0.6921	0.6484	0.7079	0.7722	0.7957	0.6848	0.6917	0.5006	0.3601	0.5055	0.5135	0.5306	0.5446	0.5437	0.4895	0.4955	0.5004	0.2903	0.3012	0.2742	0.3272	0.2952	0.3037
0.6894	316.868	0.1491	0.1109	0.1128	0.1889	0.1479	0.1561	0.1311	0.1622	0.1449	0.1463	0.1561	0.1494	0.1986	0.1918	0.1464	0.1363	0.2165	0.2108	0.1757	0.1775	0.1516	0.1212	0.135	0.1915	0.1497	0.1526	0.1542	0.179	0.1535	0.155	0.1213	0.0903	0.0925	0.0918	0.098	0.1008
0.6898	541.83	0.1036	0.083	0.0899	0.1166	0.0668	0.1057	0.1043	0.1182	0.0985	0.0995	0.1713	0.1848	0.1725	0.1277	0.1871	0.1516	0.1207	0.1004	0.152	0.1535	0.1212	0.1091	0.1112	0.1206	0.0988	0.1185	0.1095	0.1165	0.1126	0.1137	0.2141	0.1525	0.1545	0.1553	0.1674	0.1722
0.69	578.799	0.5852	0.4972	0.5917	0.5648	0.5904	0.6863	0.6573	0.6403	0.6017	0.6077	0.7956	0.6802	0.7678	0.7009	0.8219	0.803	0.8323	0.9934	0.7994	0.8074	0.6413	0.5459	0.6392	0.6052	0.6589	0.7231	0.7087	0.749	0.655	0.6615	0.4417	0.4231	0.3454	0.4207	0.4036	0.4152
0.6901	850.747	0.3326	0.3924	0.3417	0.3612	0.3108	0.3701	0.4013	0.3706	0.3601	0.3637	0.3731	0.3349	0.3302	0.3643	0.3444	0.3122	0.3619	0.3092	0.3413	0.3447	0.3445	0.3798	0.3405	0.3656	0.3241	0.3591	0.3953	0.3637	0.3573	0.3609	0.3709	0.3325	0.2497	0.3184	0.3147	0.3237
0.6908	714.772	0.5765	0.5251	0.5359	0.528	0.5351	0.6389	0.6391	0.6467	0.5782	0.5839	0.6448	0.556	0.6105	0.6807	0.6187	0.7278	0.5619	0.6978	0.6373	0.6436	0.5967	0.5355	0.5574	0.5722	0.5647	0.6681	0.6259	0.6763	0.5963	0.6022	0.5092	0.5025	0.4889	0.6037	0.5208	0.5357
0.6916	782.758	0.4083	0.4549	0.5736	0.4322	0.4395	0.5258	0.4987	0.5721	0.4881	0.493	0.5405	0.5052	0.5065	0.4336	0.4844	0.5492	0.4854	0.4841	0.4986	0.5036	0.4437	0.4699	0.5596	0.4369	0.4577	0.5371	0.5004	0.5633	0.4935	0.4984	0.4615	0.4081	0.3823	0.3435	0.3949	0.4062
0.6917	572.842	0.9055	0.8041	0.7437	0.8605	0.6914	0.7538	0.7919	0.6608	0.7765	0.7842	0.9759	0.8395	0.8277	0.8103	0.8325	1.0172	0.7891	0.8428	0.8669	0.8755	0.9279	0.8171	0.7687	0.8563	0.7381	0.8287	0.7993	0.7251	0.8036	0.8116	0.8073	0.7096	0.7077	0.7308	0.7315	0.7524
0.6923	510.811	0.5755	0.3887	0.4829	0.4732	0.5297	0.6888	0.6865	0.6099	0.5544	0.5599	0.7079	0.5735	0.7015	0.6541	0.8621	0.8551	0.8165	0.7865	0.7447	0.7521	0.6118	0.4373	0.5405	0.5241	0.6232	0.7383	0.7267	0.6715	0.6056	0.6116	0.4686	0.3804	0.3306	0.3941	0.3895	0.4007
0.6928	504.854	0.7636	0.844	0.8264	0.8957	0.8886	0.903	0.7847	0.7216	0.8285	0.8367	0.9117	0.8446	0.9965	0.86	0.9614	1.0821	0.8762	0.8853	0.9272	0.9365	0.8049	0.8484	0.8735	0.8956	0.9207	0.9579	0.816	0.7826	0.858	0.8666	0.8191	0.6669	0.7389	0.6685	0.7161	0.7366
0.6931	158.963	2.9354	3.135	2.9993	3.0106	2.5393	2.7198	3.253	2.8436	2.9295	2.9588	2.929	2.9406	2.8011	2.8286	2.8426	3.3874	2.7746	2.9844	2.936	2.9654	2.9486	3.1016	2.9644	2.9943	2.6555	2.9179	3.1642	2.9517	2.9474	2.9767	2.4217	2.3166	2.2573	2.2294	2.2832	2.3486
0.6939	436.867	0.8105	0.918	0.8489	0.9876	0.7796	0.9522	0.9337	0.8882	0.8898	0.8987	1.0032	0.9635	1.0089	0.9368	0.9865	1.0251	1.0306	1.015	0.9962	1.0062	0.8633	0.9341	0.8936	0.9845	0.8446	0.9805	0.9679	0.9437	0.9217	0.9308	0.8111	0.7219	0.747	0.6308	0.7204	0.7411
0.6941	90.9755	1.4229	1.2912	1.248	1.1163	1.1125	1.4174	1.5293	1.2283	1.2957	1.3087	1.3568	1.334	1.1944	1.1319	1.3885	1.6051	1.3215	1.2732	1.3257	1.3389	1.4134	1.3085	1.2408	1.1314	1.2003	1.4797	1.4919	1.2708	1.3105	1.3235	1.0418	1.075	1.0904	1.0309	1.0489	1.079
0.6945	242.924	0.7613	0.6844	0.6441	0.7025	0.9056	0.6134	0.7206	0.9071	0.7424	0.7498	0.7753	0.6788	0.6364	0.6471	0.6149	0.8739	0.847	0.684	0.7197	0.7269	0.7687	0.6864	0.6454	0.6954	0.8443	0.6861	0.7602	0.8712	0.7408	0.7481	0.5632	0.6761	0.5592	0.5617	0.5841	0.6009
0.6948	368.881	0.9518	0.9566	1.0264	1.0995	1.0297	1.119	1.2233	1.0695	1.0595	1.0701	1.1941	1.0056	1.1619	1.147	1.33	1.206	1.1941	1.156	1.1743	1.1861	1.0178	0.9738	1.0658	1.1226	1.1225	1.1526	1.2283	1.1189	1.0944	1.1053	0.8584	0.8174	0.8115	0.7687	0.8059	0.829
0.695	164.92	1.6568	1.511	1.5729	1.7981	1.4579	1.7657	1.7375	1.7487	1.6561	1.6726	1.873	1.745	1.9997	1.6622	1.949	1.9483	2.0132	2.0177	1.901	1.92	1.7198	1.5776	1.6886	1.7814	1.6062	1.8303	1.8256	1.863	1.7272	1.7444	1.4148	1.3398	1.3379	1.366	1.351	1.3897
0.6951	191.075	0.2911	0.3469	0.3037	0.3027	0.3831	0.3481	0.2752	0.3137	0.3206	0.3238	0.3381	0.2835	0.4731	0.4382	0.4244	0.3547	0.2725	0.3283	0.3641	0.3677	0.3044	0.3326	0.348	0.3403	0.3995	0.3533	0.2773	0.3254	0.3334	0.3367	0.3635	0.4052	0.3601	0.3645	0.3696	0.3802
0.6968	174.937	0.2227	0.1662	0.2172	0.1592	0.2673	0.2108	0.234	0.1902	0.2085	0.2105	0.2759	0.2752	0.207	0.2099	0.2091	0.2356	0.2751	0.2579	0.2432	0.2456	0.2373	0.1946	0.2157	0.1737	0.2563	0.2193	0.2469	0.2127	0.2184	0.2206	0.1673	0.1636	0.2151	0.1552	0.1735	0.1785
0.6987	232.903	1.0974	1.0306	1.1355	1.1944	1.1727	1.19	1.177	1.1792	1.1471	1.1586	1.5249	1.3125	1.5001	1.3383	1.4586	1.4289	1.1813	1.2777	1.3778	1.3916	1.2109	1.1069	1.2333	1.243	1.2639	1.2631	1.1901	1.2345	1.2118	1.2238	0.9886	0.9691	0.9443	0.7949	0.915	0.9412
0.7085	546.829	0.2909	0.3949	0.3428	0.3167	0.2572	0.3458	0.3356	0.3068	0.3238	0.3271	0.3696	0.3217	0.3477	0.3198	0.3816	0.319	0.2881	0.3111	0.3323	0.3356	0.3122	0.3784	0.3458	0.3207	0.2931	0.3425	0.3269	0.3156	0.3278	0.331	0.2002	0.2511	0.2393	0.2396	0.2302	0.2368
0.7119	556.858	0.3866	0.4023	0.3586	0.3195	0.4829	0.3153	0.4983	0.2971	0.3826	0.3864	0.4121	0.4607	0.3598	0.3437	0.3884	0.4578	0.3294	0.3881	0.3925	0.3964	0.395	0.4191	0.3607	0.3289	0.4658	0.3549	0.4603	0.3284	0.3872	0.3911	0.3519	0.2746	0.254	0.2543	0.2809	0.2889
0.713	358.848	0.1183	0.0809	0.096	0.1014	0.0809	0.1183	0.1222	0.0641	0.0978	0.0987	0.1575	0.1371	0.1054	0.1381	0.1333	0.1443	0.0921	0.1389	0.1308	0.1321	0.1288	0.0955	0.0989	0.1118	0.0956	0.1261	0.1158	0.0853	0.1067	0.1077	0.1051	0.1147	0.0808	0.0879	0.0962	0.0989
0.7142	538.798	0.1702	0.1733	0.1923	0.2131	0.195	0.1534	0.1865	0.144	0.1785	0.1803	0.22	0.1434	0.1545	0.2057	0.2066	0.176	0.1711	0.1557	0.1791	0.1809	0.1836	0.1666	0.1837	0.2133	0.2009	0.1607	0.1845	0.1507	0.1796	0.1814	0.134	0.1261	0.1652	0.1206	0.1351	0.139
0.7144	460.781	0.3006	0.3432	0.2876	0.3457	0.2439	0.3318	0.3361	0.2861	0.3094	0.3125	0.3508	0.2695	0.3889	0.3109	0.388	0.3562	0.4122	0.3306	0.3509	0.3544	0.3148	0.3263	0.3146	0.3403	0.2847	0.3414	0.3589	0.3049	0.3216	0.3248	0.2381	0.2407	0.2561	0.3081	0.2581	0.2655
0.7146	548.826	0.2556	0.2302	0.1651	0.2175	0.1514	0.2048	0.285	0.2051	0.2143	0.2165	0.2451	0.1774	0.2373	0.2053	0.2108	0.2371	0.2002	0.1895	0.2128	0.215	0.2542	0.218	0.1842	0.2166	0.169	0.2151	0.2663	0.2061	0.2152	0.2173	0.2172	0.2003	0.1705	0.1671	0.1869	0.1922
0.7161	654.714	0.268	0.249	0.3052	0.1986	0.2053	0.2345	0.2201	0.2395	0.24	0.2424	0.2495	0.2126	0.2764	0.2345	0.2417	0.2183	0.2037	0.189	0.2282	0.2305	0.2647	0.2411	0.2995	0.2097	0.2178	0.2328	0.2182	0.2322	0.2384	0.2407	0.2183	0.1713	0.1548	0.2147	0.1879	0.1933
0.7172	274.88	0.1499	0.1611	0.1447	0.1421	0.1594	0.1277	0.1636	0.219	0.1584	0.16	0.236	0.2006	0.1544	0.21	0.1635	0.1442	0.194	0.1548	0.1822	0.184	0.1724	0.1719	0.1479	0.1608	0.1628	0.1332	0.173	0.2076	0.1653	0.167	0.1482	0.1297	0.1423	0.1275	0.1356	0.1394
0.7181	404.819	0.1375	0.1667	0.1494	0.1398	0.1474	0.1135	0.1547	0.1549	0.1455	0.1469	0.1807	0.1211	0.1715	0.15	0.1433	0.1717	0.1638	0.1007	0.1504	0.1519	0.1491	0.156	0.1557	0.1438	0.1486	0.1295	0.1586	0.1445	0.1475	0.149	0.1357	0.133	0.1528	0.1155	0.1329	0.1367
0.7182	712.671	0.176	0.2795	0.2091	0.1527	0.1888	0.184	0.2409	0.2123	0.2054	0.2075	0.1842	0.1823	0.1991	0.1954	0.2251	0.1805	0.2014	0.2094	0.1972	0.1991	0.179	0.2564	0.2076	0.1651	0.201	0.185	0.2333	0.2168	0.2045	0.2065	0.1214	0.1579	0.1133	0.1543	0.1354	0.1392
0.7194	714.668	0.1628	0.176	0.1566	0.2041	0.176	0.204	0.1415	0.1669	0.1735	0.1752	0.1409	0.1812	0.1418	0.2221	0.1794	0.1765	0.1927	0.214	0.1811	0.1829	0.1581	0.1782	0.1537	0.2107	0.1795	0.1991	0.156	0.1834	0.1764	0.1781	0.1194	0.1164	0.121	0.109	0.1153	0.1186
0.7195	332.838	0.1916	0.2268	0.1956	0.216	0.182	0.2296	0.1961	0.1845	0.2028	0.2048	0.2165	0.2291	0.2039	0.2263	0.2244	0.2447	0.2179	0.2414	0.2255	0.2278	0.1989	0.2285	0.1987	0.2208	0.1956	0.2358	0.2037	0.204	0.2097	0.2117	0.1682	0.1869	0.2025	0.1667	0.1793	0.1844
0.7197	770.626	0.195	0.2029	0.1508	0.1749	0.2197	0.1489	0.1396	0.1905	0.1778	0.1796	0.1518	0.1834	0.1854	0.1739	0.2363	0.1357	0.2359	0.1582	0.1826	0.1844	0.1851	0.199	0.1603	0.1764	0.2273	0.1471	0.1656	0.1868	0.18	0.1818	0.1696	0.1307	0.1241	0.1562	0.1437	0.1478
0.7199	644.684	0.2249	0.2497	0.2124	0.2243	0.2439	0.2139	0.188	0.2178	0.2219	0.2241	0.1633	0.2573	0.2143	0.2077	0.2703	0.288	0.1876	0.2507	0.2299	0.2322	0.2105	0.2529	0.214	0.2223	0.2544	0.235	0.1898	0.2319	0.2251	0.2274	0.1962	0.1791	0.1564	0.1584	0.1708	0.1757
0.7217	518.739	0.2717	0.3129	0.2473	0.2526	0.2862	0.3435	0.2678	0.269	0.2814	0.2842	0.2663	0.2496	0.2412	0.2239	0.2654	0.2514	0.2595	0.2056	0.2454	0.2478	0.2717	0.2985	0.247	0.2478	0.2851	0.3235	0.2684	0.2591	0.2738	0.2766	0.2452	0.2426	0.1945	0.2379	0.2277	0.2343
0.7218	566.67	0.2892	0.2546	0.2025	0.238	0.2433	0.2934	0.2207	0.3523	0.2618	0.2644	0.2302	0.2625	0.2157	0.1953	0.2418	0.2779	0.2613	0.2555	0.2425	0.245	0.2758	0.2579	0.2069	0.2295	0.2466	0.2924	0.2333	0.3357	0.2583	0.2609	0.2148	0.1784	0.1513	0.2021	0.1848	0.1901
0.7222	382.765	0.452	0.5181	0.4634	0.4879	0.4396	0.4731	0.4918	0.491	0.4771	0.4819	0.5023	0.4418	0.5038	0.4362	0.4877	0.4445	0.4681	0.4519	0.467	0.4717	0.467	0.5014	0.4759	0.4796	0.4586	0.4706	0.4908	0.493	0.4772	0.482	0.414	0.3932	0.4002	0.3523	0.386	0.3971
0.7226	516.746	0.1334	0.1982	0.1465	0.1738	0.1974	0.1536	0.1825	0.1928	0.1723	0.174	0.1315	0.1895	0.162	0.1833	0.1934	0.1792	0.1636	0.1448	0.1684	0.1701	0.1336	0.197	0.1512	0.178	0.1993	0.1617	0.1795	0.185	0.1723	0.174	0.117	0.1426	0.0961	0.1038	0.1137	0.117
0.7231	206.893	1.0703	1.1625	1.1148	1.0821	1.0382	1.1282	1.0753	1.0986	1.0963	1.1072	1.1584	1.0005	1.0712	1.1215	1.1898	1.1176	1.1134	1.07	1.1053	1.1164	1.098	1.1274	1.1094	1.103	1.0928	1.137	1.096	1.1186	1.1046	1.1156	0.8561	0.9149	0.8548	0.8972	0.8719	0.8969
0.7233	624.63	0.2219	0.2056	0.2093	0.1873	0.1558	0.186	0.1818	0.1888	0.1921	0.194	0.2177	0.1889	0.1661	0.183	0.1604	0.2187	0.1839	0.192	0.1888	0.1907	0.222	0.2024	0.1994	0.1881	0.1593	0.1962	0.1842	0.1944	0.1923	0.1942	0.1337	0.175	0.1593	0.1447	0.1516	0.156
0.7237	380.768	0.2484	0.2863	0.2813	0.3455	0.2614	0.266	0.364	0.2562	0.2886	0.2915	0.3292	0.2973	0.3106	0.2761	0.3095	0.3158	0.3029	0.3314	0.3091	0.3122	0.2701	0.2905	0.2901	0.3313	0.2777	0.2814	0.3521	0.2823	0.2954	0.2984	0.2237	0.2196	0.1844	0.2046	0.206	0.2119
0.7245	334.836	0.1765	0.2169	0.1933	0.2189	0.2168	0.1398	0.1944	0.1791	0.192	0.1939	0.2349	0.2065	0.2258	0.2156	0.2039	0.26	0.2319	0.179	0.2197	0.2219	0.1921	0.2154	0.2025	0.2202	0.2167	0.1719	0.206	0.1836	0.2	0.202	0.1855	0.1588	0.2034	0.1862	0.1816	0.1868
0.7247	138.905	0.24	0.198	0.2065	0.1894	0.2046	0.2347	0.186	0.2038	0.2079	0.21	0.2364	0.1917	0.2014	0.1788	0.2174	0.2855	0.218	0.1794	0.2136	0.2157	0.2403	0.1974	0.2063	0.1886	0.211	0.2501	0.1961	0.2025	0.2105	0.2126	0.1849	0.1668	0.2029	0.1707	0.1795	0.1847
0.7248	210.886	0.1281	0.122	0.1189	0.1201	0.1118	0.1315	0.1685	0.1287	0.1287	0.13	0.1414	0.1165	0.1523	0.1204	0.1371	0.1278	0.1029	0.111	0.1262	0.1274	0.1321	0.1212	0.1279	0.1214	0.12	0.1319	0.1535	0.1273	0.1288	0.1301	0.0984	0.1491	0.1262	0.1188	0.1219	0.1254
0.725	508.71	0.2845	0.2768	0.2457	0.3029	0.2682	0.2998	0.2502	0.3078	0.2795	0.2823	0.2404	0.2853	0.2271	0.269	0.2492	0.2761	0.2627	0.2572	0.2584	0.261	0.2748	0.2803	0.2422	0.2973	0.2673	0.2968	0.2559	0.3022	0.2757	0.2784	0.1957	0.2166	0.2345	0.1642	0.2007	0.2065
0.7251	322.81	0.2043	0.2415	0.1865	0.2555	0.1704	0.2279	0.2032	0.2355	0.2156	0.2178	0.2118	0.1986	0.2326	0.1935	0.2383	0.2343	0.234	0.1811	0.2155	0.2177	0.2072	0.2319	0.1991	0.2422	0.1904	0.2319	0.2131	0.2271	0.2168	0.2189	0.1969	0.1764	0.1835	0.1452	0.1737	0.1787
0.7256	254.823	0.7497	0.889	0.7932	0.7587	0.6596	0.7543	0.761	0.7986	0.7705	0.7782	0.6514	0.6047	0.7276	0.6273	0.7093	0.6987	0.771	0.8159	0.7007	0.7077	0.7287	0.8217	0.7806	0.7328	0.6823	0.7478	0.7713	0.8231	0.7572	0.7647	0.6385	0.6231	0.6199	0.64	0.6241	0.642
0.7264	256.82	0.9006	0.9813	0.9607	1.0598	0.8451	0.971	0.9952	1.095	0.9761	0.9858	0.9589	0.8618	0.9483	0.8817	0.9471	1.0449	0.8445	0.8778	0.9206	0.9298	0.9199	0.956	0.9624	1.025	0.884	0.9998	0.9669	1.0654	0.9675	0.9771	0.7951	0.7442	0.6607	0.6388	0.7026	0.7227
0.7266	196.864	0.606	0.6279	0.627	0.6074	0.5849	0.6643	0.6764	0.5836	0.6222	0.6284	0.6229	0.5675	0.5875	0.552	0.6805	0.5763	0.6102	0.5999	0.5996	0.6056	0.6133	0.6158	0.6202	0.5993	0.6183	0.6486	0.6664	0.6025	0.6199	0.6261	0.49	0.4662	0.411	0.3733	0.4308	0.4431
0.7269	372.736	0.3271	0.3423	0.3455	0.3601	0.2982	0.3833	0.4114	0.3998	0.3585	0.362	0.3804	0.2991	0.3551	0.3987	0.4242	0.3819	0.3967	0.3601	0.3745	0.3783	0.3422	0.3331	0.3497	0.3735	0.3351	0.3869	0.4118	0.3994	0.3645	0.3681	0.2955	0.3236	0.313	0.3404	0.3149	0.324
0.7275	80.9467	0.9325	1.0529	0.9048	1.0248	0.9038	1.1083	1.0416	0.9338	0.9878	0.9977	1.0763	0.9173	0.9745	0.9713	0.9857	1.0155	0.9572	1.0086	0.9883	0.9982	0.9735	1.0239	0.927	1.0214	0.9384	1.0959	1.0307	0.9768	0.9934	1.0033	0.8106	0.8064	0.836	0.6925	0.7785	0.8008
0.7277	576.697	0.1731	0.2403	0.2129	0.2101	0.2587	0.229	0.2291	0.21	0.2204	0.2226	0.2557	0.239	0.214	0.2432	0.2766	0.3217	0.2923	0.255	0.2622	0.2648	0.1948	0.2412	0.2143	0.2206	0.2672	0.255	0.2476	0.2271	0.2322	0.2345	0.2003	0.1533	0.1605	0.185	0.173	0.178
0.7282	392.794	0.4364	0.4809	0.4873	0.4453	0.4148	0.4573	0.4746	0.4097	0.4508	0.4553	0.5043	0.5906	0.463	0.4125	0.4634	0.5223	0.4659	0.4139	0.4795	0.4843	0.4558	0.511	0.4836	0.4414	0.4335	0.4785	0.4772	0.421	0.4605	0.4651	0.3835	0.3287	0.3639	0.3314	0.3484	0.3583
0.7284	568.667	0.2647	0.23	0.2409	0.2308	0.1836	0.2325	0.2376	0.2306	0.2313	0.2337	0.2519	0.1905	0.2136	0.2005	0.2802	0.2165	0.2106	0.2307	0.2243	0.2266	0.2628	0.2212	0.2352	0.2254	0.2112	0.2308	0.2331	0.2364	0.2308	0.2331	0.1499	0.2139	0.1752	0.1421	0.1686	0.1734
0.7286	430.696	0.3766	0.3941	0.3282	0.3463	0.3506	0.3686	0.4341	0.4236	0.3778	0.3815	0.4283	0.4226	0.4786	0.4372	0.46	0.3951	0.3576	0.3972	0.4221	0.4263	0.3916	0.4033	0.3678	0.3729	0.384	0.3791	0.419	0.4273	0.3911	0.395	0.3588	0.2568	0.2402	0.2545	0.2748	0.2827
0.729	442.721	0.2935	0.3225	0.3305	0.3782	0.3376	0.3129	0.2851	0.3056	0.3207	0.3239	0.3153	0.3186	0.3407	0.3488	0.4336	0.4202	0.3622	0.3292	0.3586	0.3622	0.3005	0.3231	0.3347	0.3745	0.3674	0.3435	0.3077	0.3194	0.3321	0.3354	0.2607	0.2893	0.2561	0.2091	0.2513	0.2585
0.7292	760.599	0.1273	0.1518	0.1473	0.1779	0.1343	0.1511	0.1508	0.1227	0.1454	0.1469	0.1098	0.1532	0.2102	0.1218	0.1748	0.168	0.1492	0.1689	0.157	0.1586	0.1235	0.1529	0.1639	0.1654	0.1467	0.157	0.1519	0.1379	0.1491	0.1506	0.1068	0.089	0.1162	0.108	0.104	0.1069
0.7294	742.543	0.1433	0.1569	0.1562	0.1588	0.1384	0.1507	0.1558	0.1387	0.1499	0.1513	0.1319	0.1603	0.1892	0.1809	0.2114	0.1987	0.2426	0.1555	0.1838	0.1857	0.1411	0.1585	0.1653	0.166	0.1593	0.1645	0.1795	0.1466	0.1593	0.1609	0.1057	0.1027	0.1467	0.1224	0.1182	0.1216
0.7296	802.497	0.2374	0.2591	0.2031	0.2808	0.1966	0.2452	0.209	0.195	0.2283	0.2306	0.2454	0.209	0.1957	0.2111	0.2641	0.2101	0.1787	0.1914	0.2132	0.2153	0.2406	0.2477	0.2023	0.2658	0.2169	0.2387	0.2034	0.1989	0.2257	0.228	0.1974	0.1676	0.1404	0.1537	0.1631	0.1678
0.7297	200.858	0.1545	0.1755	0.1983	0.2156	0.2294	0.2088	0.1562	0.1887	0.1909	0.1928	0.1783	0.1806	0.1653	0.1881	0.1478	0.1782	0.1672	0.2136	0.1774	0.1792	0.1613	0.1777	0.191	0.2107	0.2118	0.2031	0.1606	0.2	0.1885	0.1904	0.1114	0.1654	0.1244	0.1275	0.1309	0.1346
0.7298	798.496	0.1522	0.2102	0.1544	0.1968	0.1483	0.1621	0.1561	0.1234	0.1629	0.1646	0.1859	0.1544	0.2046	0.1503	0.1577	0.1802	0.1427	0.1669	0.1678	0.1695	0.1615	0.1972	0.1679	0.1869	0.1529	0.1684	0.1543	0.1379	0.1651	0.1667	0.1415	0.1186	0.1528	0.1058	0.1284	0.1321
0.7302	788.471	0.1561	0.1886	0.1741	0.1461	0.1189	0.1724	0.1636	0.1474	0.1584	0.16	0.1428	0.2207	0.1496	0.1639	0.1196	0.1906	0.1616	0.187	0.167	0.1686	0.1535	0.1976	0.1688	0.1521	0.1209	0.1788	0.1648	0.1615	0.1614	0.1631	0.0955	0.1035	0.0839	0.121	0.1	0.1028
0.7305	614.598	0.2321	0.2178	0.1865	0.2121	0.1695	0.2134	0.2534	0.2394	0.2155	0.2177	0.2516	0.2006	0.1794	0.2391	0.2246	0.2137	0.1998	0.2505	0.2199	0.2221	0.2382	0.2145	0.1856	0.2211	0.1862	0.2157	0.2423	0.2483	0.2178	0.22	0.1509	0.1709	0.1739	0.1942	0.1708	0.1756
0.7306	616.597	0.2226	0.2934	0.2764	0.2508	0.2177	0.2663	0.2681	0.3131	0.2636	0.2662	0.2458	0.2888	0.2798	0.298	0.2602	0.3021	0.2956	0.2943	0.2831	0.2859	0.2296	0.2937	0.2787	0.2653	0.2319	0.2782	0.2779	0.316	0.27	0.2726	0.1637	0.1864	0.2174	0.2362	0.1989	0.2046
0.7307	428.698	0.1525	0.1821	0.1473	0.1584	0.1837	0.1879	0.1754	0.2003	0.1735	0.1752	0.1666	0.1575	0.1989	0.2165	0.1831	0.2028	0.1763	0.1791	0.1851	0.187	0.1568	0.1768	0.1611	0.1748	0.1863	0.1936	0.1774	0.1997	0.1774	0.1791	0.1325	0.1027	0.1088	0.1137	0.1133	0.1165
0.731	266.849	0.2984	0.3606	0.2923	0.3374	0.3711	0.4158	0.3671	0.3834	0.3533	0.3568	0.3822	0.3318	0.3757	0.3238	0.3166	0.3609	0.3546	0.3442	0.3487	0.3522	0.3211	0.3551	0.3148	0.3373	0.3626	0.406	0.3677	0.3827	0.3541	0.3576	0.353	0.3008	0.2845	0.2813	0.3019	0.3105
0.7312	390.798	0.3522	0.3648	0.3438	0.3583	0.3218	0.3452	0.4154	0.3298	0.3539	0.3575	0.3626	0.3406	0.3878	0.3783	0.3904	0.4952	0.348	0.3191	0.3778	0.3815	0.3566	0.3605	0.3566	0.367	0.3443	0.387	0.4024	0.3352	0.3619	0.3655	0.3252	0.3345	0.2846	0.328	0.3149	0.3239
0.732	510.708	0.2566	0.2187	0.1927	0.2708	0.1986	0.2453	0.2594	0.214	0.232	0.2343	0.1598	0.2127	0.2534	0.2277	0.2051	0.1943	0.1552	0.205	0.2017	0.2037	0.2335	0.2183	0.209	0.2625	0.2033	0.2348	0.2355	0.217	0.2256	0.2279	0.1847	0.158	0.1888	0.12	0.1612	0.1659
0.7321	456.698	0.0866	0.125	0.0962	0.1015	0.0865	0.0768	0.1072	0.1233	0.1004	0.1014	0.1353	0.1078	0.0996	0.0913	0.1248	0.1531	0.1328	0.1152	0.12	0.1212	0.0993	0.1213	0.0975	0.0999	0.0977	0.097	0.1148	0.1243	0.1059	0.107	0.0669	0.0633	0.0741	0.0817	0.0708	0.0728
0.7323	604.57	0.1255	0.131	0.1242	0.1862	0.167	0.1321	0.1724	0.1178	0.1445	0.146	0.1209	0.1686	0.1662	0.1239	0.1745	0.1543	0.153	0.1754	0.1546	0.1561	0.125	0.1411	0.1354	0.1722	0.1714	0.1391	0.1692	0.1359	0.1479	0.1493	0.0907	0.132	0.1075	0.0925	0.1046	0.1076
0.733	500.68	0.2769	0.3338	0.2908	0.3214	0.2296	0.3337	0.2833	0.3492	0.3023	0.3054	0.297	0.3045	0.2851	0.3066	0.29	0.3056	0.2623	0.2205	0.284	0.2868	0.2834	0.3281	0.2908	0.3208	0.2486	0.3299	0.2808	0.3241	0.2994	0.3023	0.2812	0.2288	0.215	0.2079	0.2309	0.2375
0.7333	666.524	0.0917	0.1135	0.1135	0.1459	0.0814	0.1181	0.1166	0.1081	0.1111	0.1122	0.0681	0.0908	0.1135	0.1233	0.1138	0.1034	0.1183	0.1099	0.1051	0.1062	0.0862	0.1083	0.1141	0.1416	0.091	0.1156	0.1182	0.1113	0.1102	0.1113	0.1052	0.0847	0.0835	0.0747	0.0862	0.0886
0.7349	784.442	0.1987	0.2215	0.184	0.177	0.1541	0.1761	0.1413	0.2043	0.1821	0.1839	0.176	0.2377	0.1431	0.161	0.2461	0.1958	0.1681	0.1757	0.1879	0.1898	0.194	0.2267	0.1746	0.1747	0.1801	0.1829	0.1496	0.2019	0.1846	0.1864	0.155	0.1111	0.1206	0.1089	0.1227	0.1262
0.7351	490.65	0.2607	0.2785	0.2596	0.2656	0.2709	0.2955	0.3045	0.2482	0.2729	0.2757	0.2113	0.2662	0.2248	0.2583	0.326	0.3041	0.2346	0.2929	0.2648	0.2674	0.2495	0.2768	0.2521	0.2664	0.2892	0.3007	0.2898	0.2661	0.2724	0.2751	0.2528	0.1889	0.2151	0.2299	0.2195	0.2257
0.7379	96.9206	0.2301	0.2598	0.2416	0.2436	0.3106	0.254	0.3022	0.2887	0.2663	0.269	0.3007	0.3541	0.288	0.3166	0.2506	0.2856	0.2943	0.2621	0.294	0.2969	0.2491	0.2849	0.2545	0.2647	0.2998	0.2647	0.3033	0.2889	0.2748	0.2775	0.2289	0.2282	0.2714	0.1832	0.2256	0.2321
0.7382	394.791	0.18	0.2554	0.2117	0.1963	0.1904	0.2095	0.1791	0.1891	0.2014	0.2034	0.1843	0.1929	0.2155	0.2477	0.2668	0.2382	0.1668	0.1468	0.2074	0.2095	0.182	0.2409	0.2137	0.2114	0.2129	0.219	0.1778	0.1827	0.2041	0.2061	0.1972	0.1834	0.1787	0.1744	0.1816	0.1868
0.7484	408.769	0.1177	0.1074	0.126	0.108	0.1129	0.0995	0.1359	0.1053	0.1141	0.1152	0.1201	0.1368	0.0997	0.1206	0.133	0.1014	0.141	0.1025	0.1194	0.1206	0.1189	0.1154	0.12	0.1123	0.1198	0.101	0.1386	0.1072	0.1161	0.1172	0.097	0.0938	0.0916	0.0607	0.0849	0.0874
0.749	120.002	0.1595	0.1374	0.1599	0.1383	0.1552	0.1067	0.1736	0.2015	0.154	0.1556	0.1393	0.1215	0.0956	0.0991	0.1326	0.1546	0.1199	0.133	0.1245	0.1257	0.1552	0.1341	0.1445	0.1297	0.1517	0.12	0.1617	0.1886	0.1474	0.1489	0.1048	0.1224	0.1302	0.1039	0.1142	0.1174
0.7502	179.088	0.2663	0.2636	0.2245	0.2483	0.3516	0.3209	0.2075	0.2359	0.2648	0.2675	0.3043	0.268	0.2699	0.193	0.2729	0.3225	0.2261	0.2983	0.2694	0.2721	0.2772	0.266	0.2371	0.2367	0.3366	0.3246	0.2144	0.2582	0.2674	0.2701	0.2398	0.2316	0.1607	0.1965	0.2051	0.211
0.7506	197.1	0.7825	0.7361	0.8166	0.9357	0.9283	0.9022	0.7164	0.8311	0.8311	0.8394	0.7611	0.9446	0.768	0.7415	1.0052	0.9819	0.8446	1.0154	0.8828	0.8916	0.781	0.7924	0.8085	0.8955	0.962	0.9317	0.7564	0.9003	0.8488	0.8572	0.8102	0.6134	0.6866	0.6811	0.6908	0.7106
0.7535	150.012	0.2806	0.2668	0.3052	0.2671	0.2645	0.2309	0.2489	0.1986	0.2578	0.2604	0.2004	0.2286	0.1781	0.1887	0.2459	0.2317	0.1833	0.2744	0.2164	0.2186	0.2618	0.2585	0.2746	0.2498	0.2637	0.2335	0.2347	0.2235	0.2488	0.2513	0.2305	0.1917	0.1836	0.1787	0.1942	0.1997
0.7588	134.018	0.2587	0.3162	0.2915	0.1901	0.3314	0.319	0.2211	0.2771	0.2756	0.2784	0.2669	0.3556	0.358	0.2997	0.4151	0.275	0.2341	0.2821	0.3108	0.3139	0.2621	0.3277	0.3098	0.2199	0.3579	0.311	0.2267	0.2853	0.2861	0.2889	0.2981	0.2512	0.2676	0.245	0.2628	0.2704
0.7627	306.955	0.1904	0.2915	0.2094	0.2857	0.2407	0.264	0.2095	0.209	0.2375	0.2399	0.2171	0.1974	0.2403	0.2456	0.2683	0.2899	0.2192	0.2732	0.2439	0.2463	0.1981	0.2692	0.2183	0.2783	0.2514	0.2733	0.2141	0.2311	0.2405	0.2428	0.2248	0.241	0.2589	0.1998	0.2288	0.2354
0.765	147.075	5.7995	6.5962	5.2279	5.4346	6.6235	4.7437	5.254	5.9023	5.6977	5.7547	5.355	5.5775	6.1841	6.053	6.544	5.827	5.5998	6.4574	5.9497	6.0092	5.7165	6.372	5.4958	5.6466	6.7024	5.0685	5.3958	6.1956	5.7931	5.8507	6.4991	6.0423	6.0403	6.1556	6.1225	6.2979
0.7672	130.049	4.3828	5.3022	3.9758	4.6915	5.4967	4.6527	4.2319	3.5057	4.5299	4.5752	3.805	3.8695	4.7226	4.4822	4.7107	4.4354	3.6286	4.5512	4.2757	4.3184	4.259	4.967	4.1845	4.685	5.3768	4.6447	4.1212	3.8678	4.4908	4.5355	4.3192	4.3048	4.3924	3.9861	4.2081	4.3287
0.7701	189.149	0.4956	0.5222	0.5067	0.5396	0.6134	0.6586	0.5729	0.582	0.5614	0.567	0.8731	0.9487	0.799	0.7302	0.9634	0.9256	0.7802	1.1014	0.8902	0.8991	0.5934	0.6325	0.5831	0.5936	0.7127	0.7334	0.6316	0.7329	0.6476	0.654	0.4446	0.4605	0.4379	0.4428	0.442	0.4547
0.7722	191.039	1.8747	2.2985	2.3035	2.3143	2.7178	1.9227	1.9843	1.7768	2.1491	2.1706	1.8702	1.7361	2.1243	2.1413	2.223	2.2166	1.8676	2.4187	2.0747	2.0955	1.883	2.168	2.2699	2.2933	2.6312	2.0173	1.9748	1.9897	2.1422	2.1635	2.0774	1.9441	1.9686	1.7013	1.9036	1.9582
0.7745	175.118	6.884	7.2625	7.1837	5.4846	7.1572	5.1414	5.1555	7.2066	6.4344	6.4988	6.7688	7.7814	7.0655	6.5319	8.4128	7.3191	6.2772	7.2053	7.1703	7.242	6.8897	7.4298	7.1901	5.8065	7.5879	5.7494	5.4943	7.3864	6.6562	6.7224	5.8232	5.6112	6.1828	5.9597	5.8353	6.0025
0.7756	142.046	0.3579	0.3318	0.394	0.3717	0.3791	0.3834	0.3637	0.3632	0.3681	0.3718	0.3035	0.3168	0.4401	0.3664	0.4105	0.3189	0.2645	0.2484	0.3336	0.337	0.346	0.3297	0.4076	0.3741	0.3929	0.3709	0.3421	0.3421	0.3614	0.365	0.4323	0.3829	0.3958	0.3407	0.384	0.3951
0.7803	169.058	2.7216	3.7512	2.5753	3.428	3.8178	2.652	2.7393	3.6584	3.168	3.1996	2.9467	2.8689	2.9738	3.0284	3.7815	3.6374	2.6773	3.7284	3.2053	3.2374	2.7922	3.5472	2.6889	3.3604	3.8657	2.9304	2.7514	3.7682	3.195	3.2268	3.6199	3.2656	3.3837	3.2707	3.3511	3.4471
0.7836	84.0428	0.1794	0.2481	0.1958	0.2028	0.2177	0.2125	0.1783	0.2058	0.2051	0.2071	0.2041	0.2088	0.2539	0.1805	0.2098	0.1918	0.1645	0.1767	0.1988	0.2007	0.1865	0.2394	0.2115	0.1991	0.2189	0.2094	0.1766	0.2033	0.2046	0.2066	0.193	0.1953	0.1926	0.1957	0.1922	0.1977
0.7842	120.064	0.916	0.7812	0.8702	1.0951	0.8509	0.8677	0.6682	0.8626	0.864	0.8726	0.6239	0.7453	0.6306	0.6626	0.9494	0.8819	0.6041	0.7763	0.7343	0.7416	0.8469	0.776	0.8141	0.9958	0.889	0.8802	0.6587	0.8615	0.836	0.8443	1.1834	1.035	1.0169	0.9499	1.0358	1.0655
0.7905	219.026	0.6876	0.804	0.7375	0.977	1.0198	0.8369	0.9629	0.8941	0.865	0.8736	1.1299	1.0027	0.7251	0.7274	0.962	1.1125	1.2173	1.0928	0.9962	1.0062	0.8028	0.8582	0.7381	0.9231	1.0202	0.9157	1.0376	0.9686	0.903	0.9119	0.9377	0.8842	0.9626	0.8233	0.8929	0.9185
0.7976	327.008	0.4193	0.5007	0.4052	0.5484	0.4386	0.5516	0.3602	0.4228	0.4558	0.4604	0.6087	0.5025	0.4947	0.5642	0.4625	0.4879	0.4475	0.4522	0.5025	0.5076	0.4692	0.5037	0.4298	0.5579	0.4513	0.541	0.3861	0.4411	0.4702	0.4749	0.4689	0.4629	0.4175	0.4768	0.452	0.4649
0.7987	411.381	0.8488	0.9088	0.9707	0.7379	0.656	0.7448	0.9603	0.8142	0.8302	0.8385	0.8005	0.9513	0.7874	0.7	0.8604	0.7438	0.9705	0.6671	0.8101	0.8182	0.8409	0.9241	0.9293	0.7356	0.7184	0.7521	0.9727	0.7959	0.8297	0.838	0.9533	0.9567	0.8372	0.9271	0.9094	0.9354
0.7989	583.383	1.7878	1.8632	3.0979	2.13	2.0623	2.1414	1.5323	2.1123	2.0909	2.1118	3.6155	2.0386	2.7418	2.462	2.277	2.4995	2.4451	2.3735	2.5566	2.5822	2.2584	1.9168	3.0236	2.236	2.1485	2.2546	1.7808	2.2337	2.2202	2.2423	2.1227	2.2163	2.1736	2.2353	2.1651	2.2271
0.8041	412.385	0.2543	0.3341	0.2884	0.2229	0.1981	0.2207	0.2523	0.235	0.2507	0.2532	0.2613	0.2606	0.1831	0.1868	0.2237	0.2967	0.2426	0.2531	0.2385	0.2409	0.2574	0.3172	0.2633	0.2159	0.2077	0.2423	0.2524	0.2456	0.249	0.2515	0.2981	0.2386	0.2139	0.3068	0.2617	0.2692
0.8042	235.156	0.6934	0.4483	0.5044	0.6061	0.4744	0.5917	0.6027	0.6182	0.5674	0.5731	0.6753	0.5384	0.7372	0.6526	0.761	0.6473	0.642	0.734	0.6735	0.6802	0.6923	0.4733	0.5657	0.624	0.5553	0.6119	0.6189	0.6641	0.5974	0.6033	0.5682	0.5579	0.5201	0.4436	0.5172	0.532
0.8054	381.316	0.2503	0.2403	0.2704	0.3705	0.2407	0.3261	0.3267	0.4083	0.3042	0.3072	0.4341	0.4685	0.3211	0.3531	0.3169	0.2883	0.3805	0.3237	0.3608	0.3644	0.298	0.2991	0.2845	0.3698	0.2639	0.3198	0.3438	0.3963	0.3202	0.3233	0.4008	0.3769	0.3312	0.395	0.3722	0.3829
0.8064	386.207	0.7321	0.7912	0.6884	0.689	0.776	0.6124	0.9867	0.9251	0.7751	0.7829	0.7233	0.7598	0.8771	0.8868	0.6433	0.814	0.8228	0.8191	0.7933	0.8012	0.7336	0.7872	0.7395	0.7463	0.7535	0.6701	0.955	0.9204	0.784	0.7918	0.7678	0.8265	0.7566	0.8065	0.7815	0.8038
0.807	474.25	0.5529	0.4755	0.3898	0.419	0.5028	0.3815	0.3465	0.4401	0.4385	0.4429	0.4642	0.3855	0.5539	0.6528	0.4396	0.4469	0.4499	0.593	0.4982	0.5032	0.5333	0.4552	0.4332	0.4828	0.4941	0.4021	0.3764	0.4912	0.456	0.4606	0.4485	0.4891	0.526	0.4784	0.4806	0.4944
0.8075	528.366	0.3958	0.3929	0.492	0.3576	0.3704	0.3179	0.4907	0.4011	0.4023	0.4063	0.4149	0.3945	0.3606	0.5547	0.4174	0.3458	0.4237	0.3017	0.4017	0.4057	0.4026	0.3953	0.4613	0.4114	0.3881	0.3282	0.4786	0.385	0.4044	0.4084	0.4142	0.3444	0.4556	0.4538	0.4128	0.4247
0.8106	251.127	3.3844	2.3265	2.6672	2.7658	2.7593	2.0065	2.7103	3.7611	2.7976	2.8256	3.3924	2.6896	3.531	3.3654	3.2369	2.9221	3.0063	3.649	3.2241	3.2563	3.4035	2.4298	2.8988	2.9464	2.9237	2.2605	2.8135	3.8257	2.921	2.95	2.9804	2.825	2.9527	2.8398	2.8705	2.9527
0.811	527.35	0.2324	0.3057	0.2943	0.204	0.2512	0.1813	0.1909	0.1761	0.2295	0.2318	0.1698	0.221	0.1331	0.287	0.2244	0.2142	0.1985	0.2024	0.2063	0.2084	0.2178	0.2858	0.2551	0.2272	0.2481	0.1916	0.1948	0.1874	0.2249	0.2271	0.2852	0.3556	0.3096	0.2704	0.3021	0.3108
0.8112	494.363	0.3181	0.2962	0.2192	0.2992	0.1892	0.2522	0.1948	0.2038	0.2466	0.2491	0.2469	0.2072	0.2197	0.2258	0.2165	0.1645	0.2086	0.2958	0.2231	0.2254	0.3017	0.2752	0.2204	0.2835	0.1991	0.2324	0.2003	0.233	0.242	0.2444	0.2569	0.2458	0.2939	0.231	0.2543	0.2616
0.8115	399.216	0.7367	0.4275	0.481	0.5173	0.4625	0.4709	0.6059	0.627	0.5411	0.5465	0.6928	0.4535	0.7244	0.6587	0.6037	0.5527	0.6451	0.6651	0.6245	0.6307	0.7293	0.4362	0.5449	0.5585	0.5058	0.4966	0.6221	0.6527	0.5652	0.5708	0.4562	0.6696	0.5879	0.5877	0.5696	0.5859
0.8118	244.19	3.9711	6.1266	5.0034	6.8003	5.4845	5.0854	4.5661	3.84	5.1097	5.1608	1.6376	1.8504	1.6273	0.9474	1.7308	2.0284	1.5159	1.6772	1.6269	1.6431	3.4019	5.0775	4.1761	5.3758	4.6002	4.3574	3.8346	3.3683	4.2577	4.3001	2.8474	2.7268	2.3281	2.009	2.453	2.5233
0.8125	413.195	0.7854	1.0437	1.1924	1.0696	1.0466	1.215	1.1739	0.9628	1.0612	1.0718	1.5686	0.9891	1.5215	1.3493	1.0224	1.2212	1.1646	1.5557	1.2991	1.312	0.9871	1.0351	1.2815	1.1516	1.0561	1.229	1.1835	1.1425	1.1272	1.1384	0.9748	0.9712	1.057	1.0285	0.9978	1.0264
0.813	214.058	0.294	0.3611	0.2957	0.4023	0.5076	0.3573	0.3705	0.3379	0.3658	0.3695	0.4503	0.4722	0.4685	0.3444	0.5438	0.3921	0.4393	0.4159	0.4408	0.4452	0.335	0.391	0.3408	0.3916	0.5245	0.3698	0.3918	0.3668	0.3868	0.3906	0.3563	0.3704	0.3216	0.3188	0.3384	0.3481
0.8132	226.178	5.2371	7.3003	7.0715	9.2119	7.7593	7.2412	8.6732	5.6093	7.263	7.3356	2.3445	1.603	1.8315	1.7504	2.5247	1.3513	1.9207	1.9023	1.9036	1.9226	4.5331	5.8982	5.784	7.4013	6.5278	5.8126	7.0391	4.7764	5.9486	6.0078	2.3819	2.831	2.3327	2.6681	2.5279	2.6003
0.8139	370.294	7.035	5.5481	5.9439	7.0177	6.1641	4.5015	6.3414	7.446	6.2497	6.3122	6.8011	6.0332	7.1595	6.8046	7.4083	6.0479	6.7097	7.3159	6.785	6.8529	7.0115	5.6983	6.2809	7.0335	6.5769	4.9419	6.5001	7.598	6.4198	6.4836	6.2861	6.9878	5.7836	5.5289	6.0851	6.2595
0.8142	249.159	0.6101	0.3825	0.4503	0.5608	0.3642	0.4794	0.526	0.5153	0.4861	0.4909	0.4233	0.4086	0.3656	0.5059	0.4041	0.5407	0.4805	0.4501	0.4474	0.4518	0.566	0.391	0.4312	0.5524	0.3799	0.4999	0.5198	0.5111	0.479	0.4838	0.4002	0.2636	0.3247	0.3232	0.3246	0.3339
0.8144	198.084	3.5508	4.7769	3.2372	5.3389	4.4267	4.4104	3.5013	4.6006	4.2304	4.2727	4.8424	4.6486	4.354	4.2569	6.0228	4.9297	4.0792	5.3427	4.8095	4.8576	3.8949	4.7684	3.5356	5.1164	4.9041	4.5879	3.6845	4.9104	4.4003	4.444	4.5275	4.687	4.5375	4.025	4.3998	4.5259
0.8153	213.151	0.2896	0.2881	0.3341	0.2382	0.2117	0.2484	0.2141	0.3195	0.268	0.2706	0.2645	0.2758	0.2367	0.2404	0.1922	0.3204	0.2475	0.2601	0.2547	0.2572	0.2847	0.2864	0.3112	0.2411	0.2099	0.2693	0.2248	0.3119	0.2661	0.2687	0.289	0.2947	0.2591	0.2048	0.2593	0.2667
0.8157	201.12	0.215	0.2931	0.2415	0.2405	0.2975	0.4024	0.2147	0.2687	0.2717	0.2744	0.2971	0.3008	0.2541	0.3417	0.3281	0.3471	0.2248	0.3484	0.3053	0.3083	0.2368	0.2965	0.2459	0.2687	0.3098	0.3924	0.2194	0.2963	0.2817	0.2845	0.2182	0.1951	0.2031	0.211	0.2048	0.2106
0.818	428.337	1.0208	0.8249	0.8185	1.0002	0.8992	0.7382	0.8897	1.1023	0.9117	0.9208	0.992	0.8285	0.9806	0.9742	1.0441	0.8345	0.8518	0.9565	0.9328	0.9421	1.0187	0.8299	0.8636	1.0036	0.95	0.7703	0.8891	1.0916	0.9221	0.9313	0.9104	0.8798	0.8771	1.0503	0.9201	0.9465
0.8181	159.075	1.2622	1.4045	1.0924	1.4655	1.4226	1.3071	1.1196	1.4765	1.3188	1.332	1.2985	1.3776	1.2118	1.3938	1.6297	1.2654	1.1941	1.4588	1.3537	1.3672	1.2777	1.4047	1.1281	1.4619	1.4973	1.3098	1.15	1.5088	1.335	1.3482	1.1358	1.2991	1.4444	1.2448	1.2682	1.3046
0.8206	397.294	4.8527	3.8716	4.6452	3.7082	4.0869	3.0728	4.2102	4.7018	4.1437	4.1851	5.2752	4.8374	5.2173	5.2451	6.2225	5.264	4.9711	5.4354	5.3085	5.3616	4.9839	4.1348	4.8131	4.1372	4.6981	3.6631	4.4473	5.0119	4.4612	4.5055	4.5361	3.6667	4.3866	4.1267	4.1372	4.2558
0.8216	228.195	6.2726	6.8592	7.3996	6.0759	9.552	8.0003	8.7752	6.297	7.404	7.478	2.6851	1.9067	2.7861	1.7714	2.5524	1.6563	2.2714	2.0378	2.2084	2.2305	5.3983	5.643	6.2719	5.039	7.8929	6.4636	7.2056	5.3364	6.1318	6.1928	3.5683	3.982	3.8882	3.4832	3.6931	3.7989
0.8225	411.309	0.3086	0.3153	0.2847	0.2672	0.3072	0.2258	0.3683	0.4143	0.3114	0.3145	0.2972	0.3446	0.3681	0.2765	0.3901	0.3146	0.3006	0.3732	0.3331	0.3364	0.3073	0.3243	0.3072	0.2722	0.3331	0.2508	0.3548	0.4139	0.3186	0.3218	0.3164	0.3199	0.2792	0.2518	0.2889	0.2972
0.8228	472.362	1.6895	1.5464	1.2557	1.6271	1.0396	1.3203	1.1162	1.7068	1.4127	1.4268	1.4976	1.7952	1.5983	1.6483	1.9161	1.5153	1.4867	1.7753	1.6541	1.6706	1.6496	1.617	1.3486	1.6488	1.2809	1.3835	1.2221	1.7675	1.4816	1.4963	1.4805	1.3627	1.4959	1.3719	1.4135	1.454
0.8285	516.388	1.4675	1.8842	1.85	1.0678	1.2572	1.545	1.6884	1.7719	1.5665	1.5822	1.6759	1.9459	1.8111	1.7251	1.9086	1.6352	1.6593	1.5051	1.7333	1.7506	1.5275	1.9092	1.8495	1.2461	1.4438	1.5838	1.6982	1.7462	1.6174	1.6334	1.5763	1.4495	1.6726	1.6493	1.5711	1.6161
0.8309	118.086	28.5428	24.1516	27.8224	28.7915	21.2556	22.3227	23.451	20.2941	24.579	24.8248	19.8255	24.0961	16.94	17.0855	20.284	24.3009	23.0908	23.2161	21.1049	21.3159	26.4856	24.2583	25.2148	26.0944	21.3242	23.0551	23.5984	21.5685	23.8375	24.0744	23.9805	23.2893	22.7758	21.9043	22.7576	23.4097
0.8345	162.112	32.7295	36.4805	26.2042	28.7149	29.95	33.6627	28.2367	35.3181	31.4121	31.7262	37.4072	33.2603	31.9721	30.3578	37.5264	30.4731	35.1281	32.6874	33.6016	33.9376	34.076	35.8498	27.7931	29.421	32.3502	33.1925	30.2828	35.5105	32.1402	32.4596	31.8475	28.4948	30.0532	28.2028	29.3531	30.1942
0.8354	560.418	1.5384	1.4856	1.9219	1.6463	1.5367	1.5031	1.0573	1.775	1.558	1.5736	1.8898	1.9934	1.7956	1.6659	2.0557	1.6834	1.6322	1.7548	1.8089	1.8269	1.6349	1.6212	1.8997	1.6678	1.6934	1.5644	1.2147	1.8141	1.6301	1.6463	1.5201	1.7548	1.6208	1.71	1.6349	1.6818
0.8369	188.126	2.2596	1.6323	1.877	1.9938	1.8985	2.0899	1.7845	1.7396	1.9094	1.9285	0.6308	0.6776	0.5709	0.4549	0.4137	0.4796	0.5704	0.6204	0.5523	0.5578	1.8597	1.3994	1.5567	1.6213	1.5446	1.7004	1.493	1.4893	1.577	1.5927	0.727	0.7461	0.6462	0.6009	0.6732	0.6925
0.8383	172.133	4.7064	3.7968	5.0857	4.4172	6.3395	4.199	4.5589	4.2513	4.6694	4.716	1.8402	1.3478	1.9173	1.7995	2.0249	1.4991	1.2088	1.3033	1.6176	1.6338	4.0064	3.1974	4.3113	3.7939	5.3236	3.5531	3.7508	3.5837	3.9239	3.9629	2.0516	2.0782	2.7136	2.2251	2.2445	2.3088
0.8404	567.328	1.6331	1.1963	1.0139	1.2256	1.0894	1.6866	1.4474	1.7382	1.3788	1.3926	1.7354	1.1464	1.9873	1.5512	1.2519	1.4665	1.1284	1.2323	1.4374	1.4518	1.6672	1.1897	1.2648	1.3209	1.1476	1.6477	1.3808	1.6489	1.4013	1.4152	1.2813	1.1976	1.0272	1.3332	1.1977	1.232
0.8433	326.299	1.4281	1.6929	1.4358	1.1048	1.3437	1.0991	1.3257	1.4689	1.3624	1.376	0.6347	0.6066	0.7495	0.6069	0.7617	0.5093	0.499	0.4886	0.607	0.6131	1.235	1.4271	1.2697	0.9889	1.214	0.9599	1.1283	1.2483	1.179	1.1907	1.1365	1.0726	0.8705	1.1705	1.0519	1.082
0.85	347.084	0.4418	0.4988	0.4928	0.5801	0.6673	0.3476	0.6001	0.6187	0.5309	0.5362	0.5969	0.559	0.4131	0.4312	0.5774	0.7637	0.7486	0.6734	0.5954	0.6014	0.4832	0.5165	0.4752	0.5479	0.6542	0.4573	0.6441	0.6485	0.5502	0.5556	0.2549	0.3645	0.2693	0.2699	0.2868	0.295
0.8508	532.383	0.5973	0.6654	0.4483	0.4956	0.4984	0.4515	0.3985	0.4794	0.5043	0.5093	0.6167	0.4825	0.4711	0.5092	0.4408	0.373	0.5359	0.5637	0.4991	0.5041	0.6052	0.6225	0.4563	0.504	0.491	0.4361	0.4376	0.5135	0.5058	0.5108	0.5621	0.5946	0.5988	0.4894	0.5556	0.5715
0.8526	648.466	1.311	1.1299	1.4596	1.0594	0.9417	1.0138	1.2863	1.3327	1.1918	1.2037	1.6437	1.3754	1.48	1.1177	1.3874	1.2289	1.3462	1.2719	1.3564	1.37	1.4016	1.1975	1.4721	1.0848	1.0706	1.079	1.3147	1.3501	1.24	1.2524	1.8213	1.8372	1.8179	1.6509	1.764	1.8146
0.8553	136.021	2.0046	2.4011	2.2533	2.3136	1.8304	1.6241	1.8271	2.1895	2.0555	2.076	1.8616	1.8018	1.7915	2.3845	1.4432	2.6212	2.1616	2.1708	2.0295	2.0498	1.9786	2.2618	2.1481	2.3548	1.7582	1.895	1.9311	2.2393	2.0603	2.0808	1.9527	1.8578	1.8628	1.9091	1.8766	1.9304
0.859	442.322	0.8408	0.4709	0.5298	0.5375	0.7058	0.6361	0.6137	0.4336	0.596	0.602	1.1221	0.9221	0.7718	0.7295	0.8772	0.6196	0.6266	0.9362	0.8256	0.8339	0.9161	0.5872	0.5936	0.5918	0.7605	0.6384	0.6233	0.5764	0.6574	0.6639	0.9854	0.8049	0.8498	0.6901	0.8242	0.8478
0.8616	227.124	0.6606	0.9092	0.6685	0.6842	0.7669	0.6473	0.69	0.8762	0.7379	0.7452	1.3343	1.5524	1.1954	1.2118	1.5819	1.5065	1.2912	1.415	1.3861	1.3999	0.8341	1.0762	0.8049	0.8256	0.9883	0.8731	0.8504	1.0395	0.9058	0.9148	0.9474	0.914	0.9202	0.7513	0.8744	0.8994
0.8617	692.492	0.9957	0.7118	0.7281	1.0486	0.828	0.8152	0.6472	0.778	0.8191	0.8273	0.8236	1.0522	0.758	0.9524	0.8609	0.918	0.8313	1.0574	0.9067	0.9158	0.9573	0.8013	0.7393	1.0346	0.8489	0.8497	0.7007	0.8708	0.8458	0.8542	1.0912	1.1835	0.8973	0.9743	1.0262	1.0556
0.8626	736.518	0.4847	0.3891	0.6413	0.4294	0.3817	0.4548	0.5783	0.5056	0.4831	0.488	0.6533	0.7442	0.5521	0.6793	0.7852	0.4693	0.5534	0.4845	0.6152	0.6213	0.5297	0.4807	0.622	0.4974	0.4913	0.4631	0.5778	0.5127	0.5192	0.5243	0.6363	0.6038	0.6496	0.6964	0.6401	0.6584
0.8745	135.078	2.1453	2.1625	2.2795	2.0015	2.8669	2.2837	2.4783	2.3055	2.3154	2.3386	3.2334	2.0641	2.6671	2.2887	2.1315	2.4855	2.5363	2.4355	2.4803	2.5051	2.4309	2.1485	2.3889	2.0948	2.7205	2.3585	2.5184	2.3973	2.3699	2.3935	1.9113	2.0381	2.3605	2.4668	2.1722	2.2345
0.8819	119.084	5.0278	5.0636	5.136	5.3182	4.7986	5.0902	5.9852	4.9508	5.1713	5.223	6.4208	6.0258	6.6319	7.0795	5.3386	7.1211	7.1839	7.2911	6.6366	6.703	5.405	5.3319	5.5397	5.8205	5.0096	5.6602	6.3521	5.6889	5.5705	5.6258	4.374	4.5387	4.4939	4.4451	4.4183	4.5449
0.8822	432.237	63.072	57.6529	42.8052	51.2695	45.0335	55.7421	49.9382	62.8655	53.5474	54.0828	52.0421	47.6875	49.5661	53.9548	41.5077	52.6415	61.7841	55.7295	51.8642	52.3828	60.6052	55.4249	44.7287	52.4669	44.8011	55.5199	53.4697	62.5639	53.4197	53.9506	44.407	47.7891	48.075	45.8927	46.0755	47.3958
0.8839	136.047	0.7286	0.9182	0.7682	0.6373	0.4347	0.5365	0.696	0.7567	0.6845	0.6914	0.9795	0.7378	0.8748	0.8608	0.7274	0.6978	0.5538	0.5854	0.7522	0.7597	0.7956	0.8772	0.799	0.7007	0.5166	0.5831	0.6668	0.7307	0.7054	0.7124	0.7604	0.7101	0.705	0.7161	0.7157	0.7362
0.8876	531.273	0.2247	0.2372	0.1968	0.2193	0.2028	0.2551	0.175	0.2606	0.2214	0.2237	0.3815	0.4084	0.3519	0.514	0.3086	0.4889	0.4212	0.3375	0.4015	0.4055	0.2654	0.2816	0.237	0.2966	0.2331	0.3173	0.2396	0.2873	0.2682	0.2708	0.2689	0.288	0.1943	0.2422	0.2459	0.2529
0.8913	415.212	164.796	159.395	139.595	150.754	136.629	155.175	160.857	155.273	152.809	154.337	170.103	154.451	171.921	192.518	143.535	176.514	195.848	192.38	174.659	176.405	166.968	158.943	148.463	162.911	140.457	162.202	171.425	168.895	159.182	160.764	136.357	143.653	139.695	146.781	140.205	144.223
0.8929	868.595	0.2252	0.1738	0.2166	0.1653	0.1469	0.1699	0.189	0.2007	0.1859	0.1878	0.2718	0.2435	0.2332	0.2276	0.2711	0.2061	0.2168	0.3027	0.2466	0.2491	0.2381	0.1923	0.2219	0.1828	0.1811	0.1809	0.198	0.2325	0.2023	0.2043	0.2178	0.3	0.286	0.211	0.2512	0.2584
0.8932	138.054	5.4983	4.6395	5.4799	3.8236	3.9923	3.5056	3.3495	5.8476	4.517	4.5622	7.3659	9.1648	7.6331	7.2159	7.5137	8.2021	8.2569	8.0704	7.9279	8.0071	5.9977	5.8053	6.0513	4.7269	4.9589	4.7395	4.6356	6.5773	5.4043	5.458	4.1703	4.3344	4.323	4.1064	4.1912	4.3113
0.8948	203.125	0.4305	0.3932	0.333	0.3955	0.3711	0.4334	0.296	0.344	0.3746	0.3783	0.3584	0.3846	0.3394	0.3405	0.3245	0.3217	0.3165	0.3121	0.3372	0.3406	0.4145	0.393	0.3363	0.3854	0.3647	0.4093	0.3042	0.3442	0.3672	0.3709	0.3644	0.3408	0.3038	0.3052	0.3253	0.3346
0.8957	154.058	1.3695	1.2265	1.415	1.1103	1.3771	1.0256	1.1151	0.7468	1.1732	1.185	1.2481	1.2732	1.5081	1.4911	1.3943	1.1503	0.8016	1.0454	1.239	1.2514	1.3458	1.2444	1.4457	1.2185	1.4022	1.0679	1.0465	0.8439	1.1964	1.2083	1.3698	1.3373	1.1924	1.1856	1.2586	1.2946
0.8983	267.122	5.1696	4.0316	3.4052	3.6076	3.8995	2.9089	4.0334	4.5732	3.9536	3.9932	3.2847	4.9463	4.3835	3.9458	3.5367	3.7651	5.4294	4.1446	4.1795	4.2213	4.7197	4.2827	3.6694	3.7299	3.8645	3.157	4.4307	4.575	4.0327	4.0728	3.5427	3.8622	3.7387	3.7952	3.6974	3.8033
0.8988	369.169	2.2207	2.8234	1.9861	2.0349	1.6694	2.1229	2.1557	2.2058	2.1524	2.1739	1.6464	2.9371	2.3631	2.1658	1.7647	2.1616	2.9734	2.2939	2.2883	2.3111	2.0869	2.8662	2.0913	2.0886	1.719	2.1544	2.3863	2.2841	2.1987	2.2205	1.8363	1.9791	1.9535	1.9278	1.9049	1.9595
0.8996	170.032	0.1569	0.1791	0.1906	0.1834	0.1232	0.1535	0.226	0.169	0.1727	0.1744	0.1605	0.1791	0.1558	0.1781	0.1183	0.1471	0.1482	0.1035	0.1488	0.1503	0.1586	0.18	0.1828	0.1839	0.1238	0.1535	0.2085	0.156	0.1676	0.1693	0.1824	0.1387	0.1405	0.2053	0.1651	0.1698
0.9028	387.18	90.2532	85.7842	69.6517	71.3251	61.4688	84.4925	72.2391	104.346	79.9451	80.7445	77.494	99.566	81.5742	68.0167	67.6889	104.001	81.2887	86.0431	83.2091	84.0412	87.487	89.693	73.0142	71.1947	63.9925	90.3313	75.2848	102.15	81.2147	82.0219	73.9277	73.955	72.7011	71.2807	72.2365	74.3063
0.9029	105.066	3.0484	3.8317	2.677	2.4343	1.9992	2.8388	3.1978	2.9988	2.8783	2.907	2.9182	4.1259	3.0614	2.3889	2.86	4.6395	3.271	3.3207	3.3232	3.3564	3.0309	3.9251	2.7876	2.4471	2.2508	3.3271	3.2491	3.1583	3.0067	3.0366	2.7152	2.71	2.7955	2.7699	2.7202	2.7981
0.9065	70.0639	1.1829	1.37	1.1864	0.9514	1.2271	1.2085	1.0091	1.1629	1.1623	1.1739	1.2175	1.2727	1.1356	1.0013	1.289	1.2826	1.135	1.3809	1.2143	1.2265	1.1976	1.3523	1.1796	0.9736	1.2614	1.2397	1.0515	1.2492	1.1819	1.1937	1.2878	1.2743	1.2989	1.1774	1.247	1.2827
0.9075	211.146	0.4749	0.6423	0.527	0.7012	0.8085	0.6291	0.4685	0.4917	0.5929	0.5988	0.5096	0.6544	0.4686	0.5257	0.5924	0.5853	0.7357	0.4355	0.5634	0.569	0.4861	0.6486	0.5149	0.6635	0.765	0.6243	0.5414	0.4892	0.5887	0.5946	0.568	0.4904	0.4739	0.4564	0.4922	0.5063
0.9119	116.07	34.1701	38.2778	33.3335	35.2744	33.3696	30.5523	30.1007	28.2023	32.9101	33.2392	30.9528	33.4943	27.3428	25.913	33.0645	32.0073	31.6524	35.0988	31.1907	31.5026	33.5302	37.2614	31.989	33.24	33.7916	31.2352	30.8037	30.7177	32.6585	32.9831	40.6688	36.5612	34.5592	33.5386	35.9686	36.9993
0.912	613.499	0.2963	0.2611	0.3007	0.2525	0.2664	0.2245	0.3956	0.2757	0.2841	0.2869	0.1926	0.1867	0.2426	0.337	0.2336	0.2075	0.2662	0.2618	0.241	0.2434	0.2716	0.2436	0.2875	0.2766	0.262	0.2224	0.3666	0.2789	0.2748	0.2775	0.3343	0.2211	0.2432	0.2574	0.2614	0.2688
0.912	114.066	10.0845	14.2099	10.9324	12.3203	11.5875	10.0378	12.42	11.6584	11.6564	11.7729	15.5123	15.4439	13.7923	13.3512	16.59	15.8342	14.9619	15.9527	15.1798	15.3316	11.5061	14.5925	11.7098	12.7064	13.0495	11.6189	13.1952	13.0771	12.6118	12.7371	13.7189	12.8052	13.4238	12.4214	12.9614	13.3328
0.9198	237.147	1.1292	1.0495	0.9347	1.2718	0.983	1.2588	0.8308	0.9543	1.0515	1.062	0.6971	0.902	0.7805	0.8044	0.6229	0.8891	0.9318	0.7319	0.795	0.8029	1.0258	1.0175	0.9005	1.1653	0.905	1.1773	0.8651	0.9198	0.9925	1.0024	0.9396	0.9265	0.9139	0.9768	0.9298	0.9565
0.9239	304.16	0.484	0.3892	0.451	0.3097	0.3087	0.3697	0.3626	0.4128	0.386	0.3898	0.5768	0.6563	0.6176	0.5278	0.7213	0.4903	0.4436	0.7001	0.5917	0.5976	0.5099	0.4586	0.4953	0.3684	0.4196	0.4042	0.387	0.4985	0.4401	0.4445	0.3409	0.379	0.3674	0.3648	0.3594	0.3697
0.9291	298.1	1.3418	1.3355	1.0612	1.0661	0.8452	1.237	0.806	1.0236	1.0896	1.1004	1.069	1.3418	1.3459	1.4169	1.5693	1.4683	1.14	1.3237	1.3344	1.3477	1.2797	1.3438	1.1385	1.1662	1.0443	1.3086	0.8994	1.128	1.1575	1.169	1.1219	1.1648	1.0633	1.0642	1.0925	1.1238
0.9335	146.116	5.4525	4.9841	5.2865	4.368	4.6725	4.4029	4.9765	4.5503	4.8367	4.885	4.7058	4.2763	4.4296	4.5078	4.7546	4.223	4.5233	4.6255	4.5057	4.5508	5.2915	4.8303	5.0968	4.4473	4.7637	4.4019	4.9117	4.6838	4.7799	4.8274	5.3175	4.937	5.1637	4.9603	5.0437	5.1882
0.9355	187.057	5.8366	8.1921	6.0441	9.2892	5.9853	6.4595	8.6665	6.2926	7.0957	7.1667	6.4485	4.8042	6.4562	6.045	8.2329	5.8124	5.9586	8.083	6.4801	6.5449	6.0206	7.3776	6.1787	8.5548	6.6538	6.3603	8.0641	6.9199	6.9796	7.049	7.8341	6.9375	6.8677	7.1345	7.1215	7.3256
0.9357	276.118	5.9321	6.6413	5.8885	6.8588	5.7216	6.788	4.6429	5.1097	5.9479	6.0073	5.5748	7.1398	6.7543	6.8011	9.7101	8.1811	5.9657	8.4456	7.3216	7.3948	5.8718	6.8004	6.1369	6.9127	6.8345	7.2126	5.0277	6.1131	6.3282	6.3911	5.2167	5.6785	5.9224	5.4164	5.5029	5.6606
0.9358	326.375	0.5442	0.4668	0.3993	0.4781	0.4916	0.4814	0.3549	0.3772	0.4492	0.4537	0.263	0.367	0.3504	0.3795	0.389	0.4817	0.4319	0.3841	0.3808	0.3846	0.4759	0.4439	0.389	0.4577	0.4726	0.4864	0.3782	0.3884	0.4344	0.4387	0.4978	0.6184	0.5469	0.4645	0.5266	0.5417
0.9365	161.091	0.2047	0.1923	0.1892	0.2537	0.2418	0.1846	0.1834	0.2173	0.2084	0.2105	0.1969	0.1893	0.3157	0.2073	0.256	0.2421	0.2351	0.289	0.2414	0.2438	0.2038	0.1925	0.2221	0.2444	0.2491	0.2012	0.1985	0.2416	0.2179	0.2201	0.2687	0.2593	0.2391	0.2315	0.2472	0.2542
0.9383	202.142	0.1827	0.2208	0.1758	0.1917	0.2185	0.2365	0.1563	0.2001	0.1978	0.1998	0.1419	0.1925	0.2158	0.1451	0.2114	0.2091	0.2391	0.2706	0.2032	0.2052	0.1733	0.2148	0.1868	0.1817	0.2199	0.2319	0.179	0.2236	0.2003	0.2023	0.1876	0.1796	0.1212	0.1521	0.1585	0.1631
0.9575	521.417	0.5491	0.4718	0.4373	0.5383	0.5616	0.4108	0.4621	0.7281	0.5199	0.5251	0.46	0.5219	0.5769	0.7589	0.5551	0.5897	0.7494	0.5997	0.6015	0.6075	0.5294	0.4868	0.4748	0.5999	0.5684	0.4606	0.5401	0.7126	0.5434	0.5488	0.4913	0.4719	0.5137	0.5947	0.5127	0.5274
0.9613	336.219	0.4041	0.3785	0.4072	0.4663	0.4383	0.3398	0.3065	0.5621	0.4128	0.417	0.3408	0.578	0.3667	0.4024	0.4783	0.3221	0.3456	0.363	0.3996	0.4036	0.3902	0.4308	0.399	0.4547	0.4552	0.3388	0.3196	0.5239	0.4118	0.4159	0.4237	0.3347	0.4771	0.4009	0.405	0.4166
0.9625	209.117	0.7574	0.8577	0.8751	0.4659	0.7646	0.8798	0.8226	0.7783	0.7752	0.7829	0.6122	0.6396	0.6913	0.709	0.76	0.6241	0.6815	0.5767	0.6618	0.6684	0.7246	0.8069	0.8331	0.5325	0.7748	0.8235	0.795	0.7448	0.7508	0.7583	0.7203	0.6998	0.736	0.6903	0.7045	0.7247
0.9626	519.4	0.2106	0.2246	0.1813	0.2321	0.2097	0.1906	0.1611	0.2215	0.2039	0.206	0.1829	0.2199	0.2252	0.2591	0.21	0.2631	0.2708	0.2309	0.2327	0.2351	0.2047	0.2245	0.1933	0.2413	0.2129	0.211	0.1908	0.2295	0.2124	0.2145	0.2108	0.2594	0.1976	0.245	0.2259	0.2324
0.9634	138.054	0.8252	1.0166	0.9536	0.771	0.6854	1.0705	0.7607	0.8562	0.8674	0.8761	1.0898	1.0738	1.4456	1.4336	1.4164	1.2231	0.8865	1.2926	1.2327	1.245	0.8962	1.0361	1.0827	0.9477	0.8839	1.1204	0.8006	0.9922	0.9646	0.9741	0.9801	0.9249	0.9023	0.8821	0.9131	0.9393
0.9649	120.043	0.8018	1.1175	1.1044	0.9091	0.8081	1.3596	0.8765	1.2052	1.0228	1.033	1.126	1.4397	1.6228	1.8583	1.9604	1.4564	1.0669	1.4191	1.4937	1.5086	0.8877	1.2044	1.2409	1.1603	1.117	1.3982	0.934	1.2915	1.1475	1.1589	1.1547	1.0988	1.1368	1.1516	1.1241	1.1563
0.9651	241.182	0.8174	0.8044	0.7736	0.6176	0.7077	0.6229	0.6101	0.7862	0.7175	0.7247	0.6699	0.9454	0.5263	0.4521	0.7817	0.7368	0.7115	0.6166	0.68	0.6868	0.7843	0.844	0.7151	0.5816	0.7373	0.6583	0.6422	0.7613	0.712	0.7191	0.6185	0.6536	0.621	0.6501	0.6294	0.6475
0.9687	214.141	1.8299	3.1516	2.0911	2.9059	1.9982	2.6262	1.8587	2.358	2.3524	2.376	2.968	3.7513	1.8523	2.4171	2.6141	2.3351	2.3648	3.0635	2.6708	2.6975	2.1265	3.3188	2.0413	2.8103	2.1868	2.5787	2.0068	2.6021	2.446	2.4703	2.5039	2.5438	2.4764	2.3144	2.435	2.5048
0.9718	333.204	0.4236	0.3452	0.3884	0.5873	0.4629	0.4846	0.3915	0.4118	0.4369	0.4413	0.509	0.5534	0.3281	0.3777	0.4956	0.3289	0.4925	0.52	0.4507	0.4552	0.4473	0.3995	0.3751	0.5397	0.4783	0.4498	0.4213	0.4505	0.4428	0.4472	0.4442	0.4895	0.5255	0.5333	0.4931	0.5073
0.973	254.179	0.8019	0.6397	0.7196	0.9451	0.5081	0.8806	1.0064	0.9753	0.8096	0.8177	0.9051	1.0414	0.5655	0.8986	0.721	0.9038	0.8253	0.9846	0.8557	0.8642	0.832	0.7443	0.6843	0.9427	0.5705	0.8955	0.9705	1.0021	0.8257	0.8339	0.8944	0.927	0.8169	0.7229	0.8319	0.8557
0.9736	273.253	1.4504	0.998	1.1228	1.152	1.1716	1.4153	1.4647	1.33	1.2631	1.2757	1.6407	1.29	1.0686	1.5038	1.8254	1.5367	1.4482	1.6426	1.4945	1.5094	1.5058	1.0767	1.1147	1.2532	1.3575	1.4607	1.4754	1.4453	1.3286	1.3418	1.4585	1.4416	1.3204	1.2561	1.3555	1.3943
0.975	455.329	0.1666	0.2109	0.1679	0.2035	0.2249	0.216	0.1492	0.1718	0.1888	0.1907	0.2192	0.2017	0.1467	0.2504	0.1927	0.2306	0.2414	0.1996	0.2103	0.2124	0.1807	0.2096	0.1634	0.2175	0.22	0.2219	0.1743	0.1834	0.1953	0.1973	0.2975	0.2836	0.223	0.3225	0.2788	0.2868
0.9852	341.19	0.9418	0.7174	0.6732	0.9847	0.7756	0.9919	0.7574	0.9742	0.852	0.8605	0.9375	1.0086	0.9292	0.8126	0.8175	0.8941	0.6764	0.6756	0.8439	0.8524	0.9455	0.7945	0.7412	0.9507	0.798	0.9771	0.7444	0.9202	0.8547	0.8632	0.6479	0.6957	0.6452	0.6786	0.6602	0.6791
0.9875	339.172	0.6463	0.5135	0.5166	0.8894	0.6261	0.7978	0.5812	0.6597	0.6538	0.6604	0.6585	0.7938	0.5639	0.7427	0.7141	0.6396	0.5207	0.4306	0.633	0.6393	0.6526	0.5868	0.5312	0.8609	0.6582	0.7656	0.5717	0.6161	0.6522	0.6587	0.5576	0.56	0.5236	0.4388	0.5148	0.5296
0.9877	287.196	5.6332	3.7487	5.5864	3.7553	5.8746	5.1116	5.1724	4.9188	4.9751	5.0249	4.5297	5.15	4.0989	3.7925	4.4729	5.1334	4.856	4.855	4.6111	4.6572	5.383	4.1213	5.239	3.8023	5.6018	5.1693	5.1445	5.025	4.9108	4.9596	3.8013	3.9687	4.0582	4.0604	3.9324	4.0451
0.9884	144.101	21.7972	12.4953	19.6697	13.1076	15.7002	17.1893	16.9515	20.4399	17.1688	17.3405	15.825	17.337	14.283	14.0004	15.6829	17.4627	17.209	16.2541	16.0068	16.1668	20.3992	13.7803	18.4088	13.4663	15.9312	17.4344	17.1902	19.8521	16.9706	17.1392	17.7945	16.8096	17.2451	15.7215	16.7237	17.2029
0.9895	190.116	2.484	2.1789	2.3248	1.6924	2.4614	2.6274	2.0247	2.6201	2.3017	2.3247	2.7593	2.4203	2.6536	2.5886	2.6909	2.5315	2.4038	2.7827	2.6038	2.6299	2.5661	2.2507	2.4196	1.9379	2.5574	2.6297	2.1421	2.7283	2.3909	2.4146	2.4372	2.2452	2.3864	2.5224	2.3738	2.4418
0.9902	173.09	0.7108	0.6142	0.7	0.4905	0.6617	0.6974	0.6142	0.6295	0.6398	0.6462	0.6641	0.6132	0.583	0.6738	0.6539	0.5212	0.6716	0.5405	0.6152	0.6213	0.7026	0.617	0.674	0.5421	0.6696	0.6596	0.6351	0.6219	0.6371	0.6435	0.5489	0.5309	0.5352	0.5628	0.539	0.5545
0.9929	209.139	0.6117	0.7328	0.5503	0.7052	0.4939	0.7831	0.4892	0.5868	0.6191	0.6253	1.0358	1.2886	0.6837	0.9748	0.7871	0.8002	0.9373	1.1702	0.9597	0.9693	0.7219	0.8768	0.5868	0.781	0.5768	0.7955	0.6085	0.7546	0.7087	0.7157	0.7092	0.7701	0.7854	0.7651	0.7499	0.7714
0.9966	308.091	0.2448	0.256	0.2281	0.3459	0.2361	0.1774	0.2704	0.232	0.2488	0.2513	0.4107	0.5298	0.6757	0.6926	0.5453	0.6179	0.5631	0.7599	0.5994	0.6054	0.2879	0.3264	0.3423	0.4378	0.3193	0.2916	0.3478	0.3764	0.3388	0.3422	0.3351	0.3407	0.4324	0.3865	0.3699	0.3805
0.9983	130.075	1.7446	2.5762	1.8435	1.9978	1.6928	1.4421	1.6224	1.6822	1.8252	1.8435	1.5616	2.1636	1.6009	1.4065	2.1722	2.5608	2.149	1.6699	1.9106	1.9297	1.7072	2.4849	1.7915	1.867	1.8416	1.7422	1.7733	1.721	1.8569	1.8754	1.2788	1.6327	1.4881	1.1371	1.3703	1.4096
1.0047	119.016	0.6707	0.6477	0.533	0.5799	0.6381	0.4843	0.5014	0.6222	0.5847	0.5905	0.3252	0.4045	0.4233	0.3355	0.6008	0.4666	0.3862	0.4339	0.422	0.4262	0.5868	0.5895	0.508	0.5234	0.6381	0.4847	0.4771	0.5883	0.5468	0.5522	0.6948	0.6892	0.6315	0.6274	0.6541	0.6729
1.0175	211.138	0.4816	0.3543	0.3054	0.2747	0.2906	0.4374	0.2715	0.3331	0.3436	0.347	0.3838	0.4769	0.4673	0.597	0.3985	0.5527	0.5297	0.4129	0.4774	0.4821	0.4593	0.387	0.3478	0.3596	0.3227	0.4713	0.3401	0.3624	0.3793	0.3831	0.3693	0.3496	0.3387	0.3531	0.3491	0.3592
1.0229	269.134	0.7005	0.8478	0.7629	0.6289	0.6664	0.5591	0.6822	0.8127	0.7076	0.7146	0.6039	0.8811	0.9605	0.6075	0.8483	0.7416	0.7885	0.6811	0.7641	0.7717	0.6796	0.8604	0.8167	0.6298	0.7232	0.6113	0.7163	0.7985	0.7258	0.733	0.8247	0.8953	0.9274	0.8946	0.8766	0.9018
1.0233	200.128	3.1209	3.2531	3.2343	2.2942	2.5091	3.0142	3.9064	3.1166	3.0561	3.0867	3.4925	3.3475	2.55	1.9053	3.0107	2.9829	3.471	3.4263	3.0233	3.0535	3.2305	3.2932	3.0778	2.218	2.6759	3.037	3.8352	3.2758	3.0648	3.0953	3.0526	3.1494	3.1069	2.8708	3.0145	3.1009
1.0248	197.089	1.0646	1.2153	1.0087	1.4981	1.1942	1.2791	1.0065	1.3693	1.2045	1.2165	1.1528	0.9021	1.048	1.0461	1.0184	1.0917	0.8505	1.0224	1.0165	1.0267	1.0922	1.1423	1.0237	1.3978	1.1668	1.2443	0.977	1.3125	1.1637	1.1752	1.0427	1.0813	1.1301	1.0054	1.0542	1.0844
1.0253	117.095	0.6735	0.4171	0.4692	0.4705	0.5464	0.6065	0.5227	0.5169	0.5278	0.5331	0.532	0.8677	0.6263	0.5565	0.5357	0.5982	0.6214	0.4787	0.6021	0.6081	0.6412	0.5329	0.5112	0.4971	0.5518	0.6106	0.5532	0.5198	0.5495	0.555	0.603	0.533	0.5249	0.4862	0.5314	0.5466
1.0254	129.1	0.2978	0.2806	0.2635	0.2707	0.3069	0.3632	0.2685	0.2951	0.2933	0.2962	0.2686	0.2804	0.2914	0.2284	0.2981	0.3154	0.2141	0.3268	0.2779	0.2807	0.2919	0.282	0.2719	0.2626	0.3092	0.3547	0.2574	0.3108	0.291	0.2939	0.2543	0.2316	0.2637	0.2347	0.2436	0.2506
1.0269	175.107	13.53	12.071	11.5404	12.2268	12.3376	12.9896	10.9784	11.4751	12.1436	12.265	10.8145	11.1846	11.1918	10.5521	12.0554	11.3267	9.8646	11.7468	11.0921	11.203	12.9126	11.9075	11.5107	11.922	12.45	12.6979	10.8063	11.8333	11.9453	12.0641	11.9217	12.0854	12.081	11.2996	11.7285	12.0645
1.0426	285.127	0.4464	0.3749	0.3995	0.3598	0.3199	0.3917	0.3859	0.5605	0.4048	0.4089	0.5712	0.5703	0.8247	0.5553	0.5201	0.6067	0.4321	0.5048	0.5732	0.5789	0.4802	0.4261	0.5089	0.4133	0.3762	0.4505	0.4016	0.5599	0.4496	0.4541	0.543	0.569	0.5365	0.5939	0.555	0.5709
1.0439	223.151	1.238	1.542	1.8354	1.3986	1.7801	1.5743	1.7568	1.6441	1.5962	1.6121	1.6018	1.4675	1.7225	1.8555	2.4411	1.849	1.5249	1.725	1.7734	1.7911	1.3361	1.5309	1.8162	1.5291	1.977	1.6604	1.7156	1.7064	1.6498	1.6662	1.4969	1.5256	1.4738	1.6553	1.5225	1.5661
1.053	244.189	5.1898	4.4089	4.5338	3.7048	6.2118	3.3208	5.4035	4.7342	4.6885	4.7353	1.8667	2.136	2.9903	2.1716	1.8683	2.0701	2.0154	1.9825	2.1376	2.159	4.3768	3.857	4.1669	3.3509	5.1865	3.0356	4.5943	4.1302	4.0697	4.1102	3.1015	3.1535	2.7743	2.8487	2.9398	3.024
1.0558	212.096	1.0206	1.1008	0.9274	0.9506	1.0519	0.8421	0.9309	1.5136	1.0422	1.0527	1.4093	1.3208	1.7094	1.5696	1.6095	1.7885	1.1868	1.3829	1.4971	1.5121	1.1239	1.1619	1.1296	1.118	1.2113	1.0921	1.0057	1.5171	1.163	1.1746	0.875	0.8005	0.8243	0.8358	0.8256	0.8492
1.0572	156.101	0.6106	0.8863	1.0239	0.6485	0.796	0.5764	0.5572	0.7372	0.7295	0.7368	0.7471	1.0219	0.7083	0.7999	0.5922	0.8054	0.9368	0.739	0.7938	0.8018	0.6482	0.925	0.9494	0.6936	0.7555	0.6407	0.6597	0.7561	0.7498	0.7573	0.7779	0.6862	0.7181	0.7135	0.7167	0.7372
1.0606	424.341	28.2031	24.5687	17.7626	21.8985	19.8391	21.9775	19.9829	25.6139	22.4808	22.7056	14.7225	15.9537	18.4975	24.7117	17.065	14.1613	14.353	14.9105	16.7969	16.9649	24.9413	22.5163	18.0379	22.8349	19.4224	20.2078	18.7506	23.4446	21.169	21.3795	27.274	26.7351	30.0364	26.5907	27.3825	28.1671
1.062	398.325	4.1911	3.0343	3.6069	3.126	2.7787	3.0917	4.3744	3.9308	3.5167	3.5519	2.0892	2.6362	2.2886	2.2122	2.1929	2.6256	1.7585	2.1911	2.2493	2.2718	3.6815	2.949	3.2922	2.9242	2.6695	3.0043	3.7517	3.5724	3.2159	3.2479	4.3344	4.8591	5.0704	4.8036	4.7192	4.8544
1.0654	251.102	4.1991	4.4276	5.1547	3.1357	3.4575	3.3394	3.5277	4.5073	3.9686	4.0083	10.8162	14.7693	18.5262	14.6513	11.0574	14.3087	13.7961	12.3242	13.7812	13.919	5.8913	7.061	8.5574	6.1035	5.4663	6.1718	6.1832	6.6719	6.4711	6.5353	8.6172	8.9841	8.1749	7.8466	8.3216	8.5601
1.0807	249.107	0.6593	0.4657	0.6407	0.5574	0.5036	0.4633	0.5457	0.5087	0.5431	0.5485	0.788	0.7704	0.6528	0.609	0.9354	0.8835	0.5042	0.6737	0.7271	0.7344	0.6951	0.545	0.647	0.5761	0.6223	0.5752	0.5407	0.5647	0.5926	0.5985	0.6352	0.5217	0.4449	0.5356	0.529	0.5442
1.0819	830.566	3.3286	4.5094	4.7065	3.463	3.0782	3.9711	4.1634	3.9468	3.8959	3.9348	2.9636	3.4731	3.8928	3.7389	2.9844	3.3402	2.8304	2.9161	3.2674	3.3001	3.2532	4.2703	4.5248	3.568	3.1002	3.8507	3.8658	3.7749	3.7587	3.7961	3.72	3.8104	3.7569	3.5942	3.6832	3.7887
1.0823	806.567	34.165	27.4543	25.1986	24.8925	30.4872	22.1267	30.7785	28.9298	28.0041	28.2841	33.7647	26.5775	21.2528	25.7626	25.709	25.0109	28.4713	36.5926	27.8927	28.1716	34.2365	27.3702	24.3295	25.3633	29.7141	23.0882	30.504	31.6645	28.1316	28.4112	26.6474	26.8353	25.8076	25.6994	25.985	26.7295
1.0834	782.567	52.0786	49.0805	50.3311	44.4842	58.5686	39.5416	60.6101	45.6635	50.0448	50.5452	59.4752	47.6898	40.8236	47.5073	47.2616	49.3066	55.3434	64.5313	51.4924	52.0073	54.2095	48.9748	48.1844	45.7	56.5356	42.4361	59.885	51.7579	50.689	51.1928	45.3195	54.7989	48.1088	48.2253	48.622	50.0152
1.084	834.598	6.5072	7.0664	9.9223	6.5608	8.4834	5.8318	7.1651	7.5103	7.3809	7.4547	8.9475	7.4291	6.0195	7.3435	7.7765	7.738	9.1911	9.8226	8.0335	8.1138	7.1563	7.1933	8.9869	6.826	8.4286	6.3776	7.7551	8.305	7.5869	7.6623	7.4225	7.4061	7.1047	7.2231	7.2162	7.423
1.0858	259.092	0.8565	1.4879	0.9148	1.0751	0.9186	1.0074	1.015	1.0712	1.0433	1.0537	2.5968	2.6096	3.3135	3.9608	2.9582	2.9011	2.8063	4.1086	3.1569	3.1884	1.3003	1.7786	1.5252	1.8217	1.4576	1.5008	1.4823	1.8953	1.5834	1.5991	0.9813	0.9298	1.001	0.9906	0.9659	0.9936
1.0875	756.551	3.3822	3.0423	3.0188	2.2642	2.6679	2.1329	2.3995	2.6879	2.6995	2.7265	4.3929	3.7576	2.8099	4.405	3.4188	3.6248	3.7321	4.7702	3.8639	3.9026	3.6545	3.2381	2.9813	2.8327	2.9013	2.5353	2.764	3.3017	3.0088	3.0387	2.777	2.2076	2.8874	2.8947	2.6648	2.7411
1.0881	754.537	1.0928	0.707	0.9299	0.9565	0.9918	0.6642	0.7473	0.6359	0.8407	0.8491	0.8491	0.7709	0.7587	0.8718	0.8389	0.8103	1.0139	1.1233	0.8796	0.8884	1.0368	0.7267	0.8914	0.9445	0.9673	0.7083	0.8229	0.7797	0.8552	0.8637	0.8965	0.8316	0.8472	0.8771	0.8545	0.879
1.0885	804.551	1.3905	1.2322	0.9968	1.0616	1.199	0.9436	1.4116	1.3188	1.1943	1.2062	1.3231	1.1982	1.2498	1.5133	1.2874	1.2916	1.5163	1.4637	1.3554	1.369	1.3805	1.2298	1.0657	1.1874	1.2397	1.042	1.4527	1.3898	1.2416	1.254	1.0749	1.1058	1.0982	1.0528	1.0721	1.1028
1.089	768.572	2.3444	2.4779	2.1978	2.4383	2.4696	1.7222	1.9375	1.8498	2.1797	2.2015	2.5952	2.0506	1.5807	2.0885	1.9147	2.3512	2.7811	3.0687	2.3038	2.3269	2.4196	2.3824	2.0531	2.3735	2.3638	1.9003	2.1725	2.216	2.2232	2.2453	2.4981	2.4006	2.165	2.1769	2.287	2.3526
1.0893	146.091	1.0786	1.2522	1.1217	1.136	1.0932	0.6206	0.8787	1.2483	1.0537	1.0642	2.1883	2.3797	1.8717	1.8335	1.9505	1.5642	1.8707	1.9422	1.9501	1.9696	1.3643	1.5432	1.3168	1.3252	1.3304	0.8676	1.1407	1.4617	1.2861	1.2989	1.075	1.0989	1.007	1.0573	1.049	1.079
1.0895	730.536	1.2125	0.796	0.8955	0.8266	1.2049	0.7943	1.2328	1.0971	1.0075	1.0175	1.3727	1.0262	0.8336	1.1911	1.2164	1.112	1.3056	1.5061	1.1955	1.2074	1.2591	0.8581	0.8844	0.9278	1.2259	0.8835	1.264	1.2319	1.0606	1.0711	1.0728	1.0745	1.1009	1.0077	1.0533	1.0835
1.0896	758.567	41.56	50.5416	40.5773	32.5017	41.3989	30.8119	34.6634	39.916	38.9964	39.3863	61.9045	48.1081	36.5764	55.5599	44.2444	52.5783	48.3259	69.9154	52.1516	52.6731	46.9074	50.1798	39.7719	38.7066	42.7526	36.679	38.5025	48.7887	42.5386	42.9612	45.8916	39.9349	39.0412	44.5507	41.9311	43.1325
1.0899	780.551	3.671	3.4472	3.3848	2.9396	3.6489	2.613	4.1038	2.6483	3.3071	3.3401	3.9958	3.5702	3.2396	3.95	3.9367	3.693	3.9666	4.327	3.8349	3.8732	3.7716	3.4955	3.3652	3.2267	3.7777	2.9152	4.1107	3.1552	3.4589	3.4933	3.0664	3.2576	3.0787	3.1207	3.0995	3.1884
1.0906	361.232	2.0091	1.3066	1.8754	2.0727	2.7103	1.9717	2.0735	1.8937	1.9891	2.009	0.8965	0.7058	1.0709	0.9328	0.766	0.695	0.8678	0.6207	0.8194	0.8276	1.7383	1.1614	1.6817	1.8028	2.2503	1.6661	1.7871	1.6069	1.7045	1.7215	1.5482	1.5919	1.3955	1.4367	1.4781	1.5205
1.0922	788.604	1.6608	1.945	1.481	1.2837	1.4951	1.1411	1.1134	1.4331	1.4441	1.4586	2.0383	2.1651	1.0542	2.1021	2.0439	2.1727	1.9788	2.5025	2.0072	2.0273	1.7645	2.0103	1.3807	1.5052	1.6588	1.4159	1.3455	1.7496	1.5945	1.6103	2.0026	1.768	1.8078	1.8688	1.8432	1.896
1.0935	158.117	15.4229	6.9824	15.8801	13.6931	14.1653	14.2718	15.8376	15.7496	14.0004	14.1404	12.7039	12.9997	12.3033	11.63	12.2333	14.8815	13.0818	13.4487	12.9103	13.0394	14.8142	8.5367	15.0571	13.3039	13.8803	14.573	15.2962	15.5394	13.8027	13.9399	15.6284	15.3654	15.3017	14.319	15.0021	15.432
1.0946	104.052	1.7124	1.5852	1.7867	1.3586	1.6071	1.6344	1.2751	1.4916	1.5564	1.572	1.6743	1.4402	1.627	1.7964	1.7732	1.6165	1.4694	1.7774	1.6468	1.6633	1.7114	1.5565	1.7554	1.4838	1.674	1.6465	1.3377	1.6039	1.5879	1.6037	1.5435	1.5892	1.5126	1.4225	1.5018	1.5448
1.0947	304.149	0.1463	0.1684	0.1626	0.194	0.1601	0.1796	0.1364	0.169	0.1645	0.1662	0.208	0.2642	0.1721	0.2211	0.2447	0.2389	0.2042	0.2574	0.2263	0.2286	0.1626	0.1934	0.1658	0.2029	0.1843	0.1966	0.1551	0.1964	0.1811	0.1829	0.1889	0.1903	0.1691	0.1866	0.1819	0.1871
1.0948	133.031	5.4884	4.9784	5.3887	4.4921	4.726	5.9426	4.1818	4.5026	4.9626	5.0122	4.9374	4.2718	4.9858	4.8865	5.0699	4.8441	4.2786	4.9774	4.7814	4.8293	5.377	4.8249	5.3142	4.6376	4.8854	5.723	4.2492	4.7398	4.9444	4.9935	4.5814	4.5369	4.3825	4.3188	4.4104	4.5367
1.0949	126.065	0.9869	1.1763	0.9047	1.0494	0.9924	1.0876	0.9913	1.0917	1.035	1.0454	1.1349	0.9104	1.1015	0.9221	1.0703	1.4514	1.4055	1.4262	1.1778	1.1896	1.0293	1.115	0.959	1.0274	1.0273	1.1915	1.1071	1.2068	1.0769	1.0876	0.9005	1.023	0.8596	0.861	0.9019	0.9278
1.0956	233.113	0.2052	0.1615	0.1688	0.1792	0.1661	0.1246	0.1286	0.1287	0.1578	0.1594	0.1804	0.2181	0.2061	0.2154	0.1808	0.1522	0.1874	0.1873	0.191	0.1929	0.2	0.1766	0.1791	0.1902	0.1724	0.1329	0.1449	0.1473	0.1671	0.1687	0.1619	0.1661	0.1477	0.1236	0.1483	0.1526
1.0978	200.095	0.217	0.2023	0.2949	0.3075	0.2109	0.301	0.2463	0.1774	0.2447	0.2471	0.3681	0.3623	0.2419	0.2236	0.3242	0.3299	0.4148	0.3028	0.321	0.3242	0.2563	0.2437	0.283	0.2892	0.2432	0.3114	0.2918	0.2148	0.2653	0.2679	0.2806	0.2526	0.2874	0.2418	0.2629	0.2705
1.0989	169.035	2.2396	2.8431	1.9954	1.703	1.854	1.5435	2.1146	1.8359	2.0161	2.0363	2.815	2.8829	3.6968	3.3877	2.255	2.1082	2.451	2.5288	2.7657	2.7933	2.3962	2.8674	2.4351	2.1496	1.9851	1.7033	2.222	2.0637	2.2168	2.2388	1.424	1.4579	1.4086	1.449	1.4205	1.4612
1.0995	165.054	6.3305	6.1844	5.6158	5.424	5.0453	5.205	5.4453	5.8644	5.6393	5.6957	8.3351	8.3706	6.8968	7.1159	8.4702	5.7625	6.4691	6.6879	7.2635	7.3361	6.8687	6.7673	5.9676	5.9097	6.0029	5.4003	5.762	6.2272	6.0813	6.1417	5.4014	5.3455	5.6054	5.7727	5.4759	5.6328
1.106	133.02	11.3967	7.448	10.2705	10.201	8.2234	9.0242	7.1852	10.8352	11.6269	7.5984	24.473	27.2758	25.0611	22.4441	28.1119	27.3487	33.5807	28.4279	24.9674	27.8268	14.7564	12.4917	14.0574	13.425	13.468	13.7909	13.9921	15.7242	15.0638	12.753	22.6115	20.5775	17.0637	17.2408	17.5468	20.6179
1.1069	147.044	0.4789	0.4914	0.4658	0.4307	0.3776	0.4601	0.4273	0.4362	0.446	0.4505	0.667	0.6295	0.5699	0.508	0.7114	0.5202	0.5487	0.54	0.5868	0.5927	0.5288	0.5287	0.4944	0.4547	0.4692	0.4801	0.4626	0.4744	0.4841	0.4889	0.3865	0.4253	0.4707	0.3632	0.4073	0.419
1.1161	115.01	23.952	27.905	22.4769	32.4147	22.4774	25.4378	28.6632	25.3061	24.4359	28.4687	78.7304	59.9283	53.5023	58.3636	74.5572	59.8394	92.8596	63.9466	80.3209	61.1389	37.9059	36.1304	30.4251	39.3558	36.2251	34.4733	45.3323	36.0818	38.6984	36.8827	48.2205	46.2333	44.084	44.7132	45.2384	49.5702
1.1198	213.036	0.1509	0.1529	0.1298	0.1484	0.1364	0.158	0.1717	0.163	0.1514	0.1529	0.2576	0.3554	0.3486	0.3654	0.3898	0.2311	0.28	0.3327	0.3201	0.3233	0.1786	0.2048	0.1857	0.2052	0.2037	0.1783	0.2011	0.2116	0.1949	0.1968	0.2183	0.1963	0.2042	0.268	0.2195	0.2258
1.1769	154.083	0.2378	0.3371	0.2314	0.3761	0.31	0.2555	0.2054	0.3463	0.2875	0.2903	0.3473	0.2747	0.468	0.4121	0.2974	0.3267	0.2411	0.3094	0.3346	0.3379	0.2667	0.323	0.2923	0.389	0.3114	0.2763	0.2166	0.3453	0.301	0.304	0.4097	0.4028	0.2801	0.3622	0.3601	0.3704
1.3098	806.567	1.8578	1.5662	1.8457	1.4497	1.2886	1.8264	1.5355	1.6772	1.6309	1.6472	1.1964	1.0947	1.699	1.1034	1.1192	1.1338	1.0521	1.3377	1.217	1.2292	1.7002	1.455	1.818	1.3759	1.2643	1.6684	1.4279	1.63	1.5353	1.5506	1.3411	1.3824	1.3049	1.3324	1.3268	1.3648
1.3922	114.054	0.4236	0.3611	0.3428	0.5023	0.3793	0.2922	0.3047	0.4789	0.3856	0.3895	0.7119	0.4432	0.5545	0.6272	0.3944	0.4482	0.4736	0.6979	0.5439	0.5493	0.4985	0.3836	0.398	0.5392	0.3889	0.335	0.3509	0.5484	0.4278	0.432	0.4566	0.4302	0.5162	0.4441	0.4572	0.4703
1.4186	132.065	0.7838	0.6742	0.5845	0.6474	0.6	0.5824	0.5195	0.8685	0.6575	0.6641	1.0062	0.8509	0.9061	0.9119	0.8793	0.796	0.7748	1.1272	0.9066	0.9156	0.8439	0.7222	0.6686	0.7213	0.6809	0.6428	0.59	0.9581	0.7241	0.7313	0.8626	0.7816	0.7449	0.7014	0.7649	0.7868
1.797	169.034	1.4138	1.5732	1.3994	1.6946	1.0732	1.0392	1.408	1.6573	1.4073	1.4214	2.0753	2.4446	2.6479	2.3698	2.2151	1.5181	1.6399	1.7675	2.0848	2.1056	1.588	1.8011	1.7217	1.8837	1.3833	1.172	1.4815	1.7277	1.5864	1.6022	1.3357	1.5059	1.4713	1.5235	1.4445	1.4859
1.8814	228.098	0.1409	0.1734	0.1611	0.1497	0.112	0.1605	0.1887	0.1818	0.1585	0.1601	0.0812	0.14	0.1097	0.1189	0.1372	0.1369	0.155	0.1194	0.1248	0.126	0.1265	0.1658	0.1489	0.1433	0.1202	0.1561	0.182	0.17	0.1509	0.1524	0.1919	0.1879	0.1705	0.1934	0.1841	0.1893
1.8907	136.038	1.7947	1.3927	2.2016	1.9192	1.4697	2.1796	2.2695	1.6534	1.86	1.8786	3.401	2.9132	3.0934	2.7877	2.6176	2.8851	2.8053	3.2644	2.971	3.0007	2.2094	1.7836	2.4379	2.1599	1.7873	2.3818	2.4293	2.1176	2.1512	2.1726	2.2358	2.0353	2.2687	2.2171	2.1673	2.2294
2.0094	159.075	6.0151	5.2629	5.0245	3.152	4.4341	5.3655	6.4158	5.0842	5.0943	5.1452	3.9808	4.8114	4.9997	4.109	3.3209	4.9416	5.0783	4.5525	4.4743	4.519	5.5318	5.1752	5.0436	3.4276	4.214	5.3121	6.1401	5.0717	4.9659	5.0152	3.9799	3.8232	4.8461	4.3282	4.2019	4.3223
2.1684	121.071	0.3621	0.2483	0.2793	0.345	0.3157	0.3443	0.2957	0.3235	0.3142	0.3174	0.2873	0.2481	0.2678	0.3046	0.2981	0.3111	0.2941	0.351	0.2953	0.2982	0.345	0.2495	0.2778	0.3381	0.3159	0.3393	0.2983	0.3388	0.3112	0.3143	0.31	0.2653	0.316	0.2535	0.2833	0.2915
2.1882	150.057	0.3272	0.3409	0.3442	0.2659	0.3597	0.2364	0.2982	0.2206	0.2991	0.3021	0.3468	0.2942	0.4309	0.3411	0.3088	0.3119	0.3758	0.3572	0.3458	0.3493	0.3338	0.3308	0.3678	0.2877	0.352	0.258	0.321	0.262	0.3126	0.3157	0.3691	0.3904	0.3607	0.3723	0.3694	0.38
2.678	182.08	4.2926	4.3798	4.3687	4.8214	3.9155	3.6725	3.1044	3.9032	4.0573	4.0978	6.7373	6.9227	6.1428	5.7741	6.6461	4.6572	4.0213	5.4828	5.798	5.856	4.9316	5.0438	4.8388	5.1126	4.6774	3.9612	3.37	4.4154	4.5199	4.5648	5.935	5.4533	5.6609	5.2602	5.5216	5.6798
2.6787	165.054	1.4074	1.4332	1.3714	1.3027	1.6982	1.2462	1.1229	1.344	1.3658	1.3794	2.0405	2.0787	1.8738	1.8256	1.7301	1.4859	1.1803	1.5727	1.7235	1.7407	1.5744	1.6034	1.5052	1.4491	1.7319	1.3201	1.149	1.4376	1.4638	1.4783	1.6686	1.5479	1.6677	1.7219	1.635	1.6819
3.1153	153.065	1.6468	1.1211	1.6612	1.4838	1.7565	1.6524	1.5893	1.5731	1.5605	1.5761	2.8431	2.2826	2.0821	1.9182	2.231	2.4671	2.0043	2.2379	2.2583	2.2809	1.9572	1.42	1.7759	1.6094	1.905	1.8771	1.7114	1.7869	1.7456	1.7629	1.546	1.5201	1.4657	1.6565	1.5316	1.5755
3.1175	136.039	0.1572	0.1021	0.1557	0.1435	0.1549	0.1797	0.1547	0.1513	0.1499	0.1514	0.2432	0.2652	0.17	0.1905	0.196	0.2702	0.1804	0.1776	0.2116	0.2138	0.1797	0.1438	0.1601	0.1569	0.1678	0.2046	0.1628	0.162	0.1663	0.168	0.1194	0.1469	0.1078	0.1136	0.1207	0.1242
3.2126	247.128	0.3717	0.3056	0.2985	0.2918	0.2896	0.3806	0.3177	0.3505	0.3257	0.329	0.425	0.5024	0.53	0.579	0.6407	0.4355	0.3637	0.6015	0.5097	0.5148	0.387	0.3568	0.3585	0.368	0.3843	0.3985	0.3327	0.4252	0.3741	0.3778	0.3346	0.3836	0.4422	0.3276	0.3683	0.3788
3.2561	184.059	0.1356	0.1502	0.1154	0.1105	0.1133	0.1268	0.1303	0.1374	0.1274	0.1287	0.2136	0.3766	0.2745	0.2751	0.2689	0.2536	0.2416	0.3501	0.2818	0.2846	0.156	0.2081	0.1562	0.1536	0.155	0.1604	0.16	0.1967	0.1672	0.1688	0.122	0.1227	0.1337	0.1091	0.1207	0.1241
3.3911	494.323	5.4846	3.7357	4.2026	4.4567	4.2704	5.1919	5.2869	5.1948	4.7279	4.7752	5.176	6.0096	5.2554	6.3051	3.7309	5.5942	5.5226	5.5164	5.3888	5.4427	5.4344	4.3285	4.4897	4.9726	4.1955	5.3475	5.401	5.4091	4.9213	4.9702	4.6058	4.7281	5.0225	5.0489	4.8028	4.9404
3.397	120.08	9.2851	9.7147	9.0018	10.6133	10.2123	10.6015	7.8308	11.3653	9.8281	9.9264	8.8665	8.9612	11.9962	12.356	10.2571	8.4741	7.3617	9.5615	9.7293	9.8266	9.2263	9.573	9.8034	11.1638	10.377	10.167	7.791	11.1759	9.8578	9.9558	12.3108	11.8838	11.8035	11.5334	11.764	12.1011
3.5141	136.059	0.2179	0.2392	0.2353	0.2591	0.2165	0.2795	0.2448	0.1314	0.228	0.2302	0.2787	0.3669	0.2483	0.2667	0.384	0.35	0.3874	0.2761	0.3198	0.323	0.2344	0.2726	0.2398	0.2636	0.2629	0.3003	0.2837	0.1727	0.2524	0.2549	0.3137	0.3802	0.3515	0.3341	0.3414	0.3512
3.5759	268.103	0.1682	0.1674	0.1978	0.2239	0.2745	0.233	0.2316	0.164	0.2076	0.2096	0.4928	0.5228	0.3343	0.3896	0.5003	0.5676	0.3268	0.4815	0.452	0.4565	0.251	0.258	0.2333	0.2684	0.3368	0.3207	0.2582	0.2514	0.2705	0.2732	0.6068	0.5376	0.4814	0.5534	0.5394	0.5548
3.5795	637.429	0.5722	0.5681	0.5493	0.528	0.7486	0.591	0.4883	0.8984	0.618	0.6242	0.6002	0.4822	0.5824	0.7371	0.5034	0.5417	0.6954	0.7848	0.6159	0.6221	0.5822	0.5493	0.5605	0.5866	0.6967	0.5845	0.5461	0.891	0.6209	0.6271	0.4943	0.4705	0.4855	0.4571	0.4721	0.4856
3.6558	227.101	0.1768	0.1701	0.1475	0.1512	0.1285	0.1485	0.1144	0.1877	0.1531	0.1546	0.2936	0.3068	0.2903	0.2618	0.2236	0.2644	0.2242	0.2807	0.2682	0.2709	0.2072	0.2055	0.1843	0.1809	0.1549	0.1796	0.1436	0.2168	0.183	0.1848	0.203	0.1676	0.1923	0.1635	0.1798	0.1849
3.7916	444.237	0.2848	0.3423	0.2283	0.285	0.2876	0.3471	0.3463	0.2971	0.3023	0.3053	0.3649	0.3285	0.3402	0.3583	0.3318	0.3184	0.385	0.3721	0.3499	0.3534	0.3065	0.3405	0.2577	0.3065	0.3033	0.3433	0.3597	0.3242	0.316	0.3192	0.3052	0.3151	0.3034	0.348	0.3147	0.3238
3.7944	131.048	0.6588	0.6439	0.5402	0.5599	0.7625	0.6791	0.5603	0.6543	0.6324	0.6387	0.5642	0.5858	0.6462	0.6322	0.4901	0.5362	0.4397	0.4954	0.5487	0.5542	0.6382	0.6324	0.5697	0.5839	0.7038	0.6496	0.5353	0.6289	0.6147	0.6209	0.6629	0.7239	0.738	0.7044	0.7002	0.7203
3.8032	127.049	0.2071	0.2443	0.1877	0.2173	0.2452	0.2261	0.2447	0.2128	0.2232	0.2254	0.2698	0.3153	0.2852	0.3297	0.2621	0.3445	0.3596	0.3626	0.3161	0.3193	0.224	0.2634	0.2133	0.2481	0.2532	0.2586	0.2765	0.2574	0.2479	0.2503	0.2115	0.2168	0.2836	0.2219	0.2311	0.2377
3.8038	149.057	0.7171	0.6084	0.5583	0.6575	1.0038	0.7361	0.6121	0.7329	0.7033	0.7103	0.6257	0.6008	0.8862	0.7683	0.8914	0.7345	0.6496	0.8222	0.7473	0.7548	0.6976	0.6095	0.6439	0.6923	0.9899	0.7432	0.6279	0.7747	0.7183	0.7255	0.647	0.6543	0.6162	0.6979	0.6473	0.6659
3.8051	120.08	13.1895	11.7466	10.1076	13.0918	13.3909	13.4916	7.9175	13.2271	12.0203	12.1405	12.5938	12.2589	14.4283	15.1439	14.2379	12.9643	11.5073	13.4539	13.3235	13.4568	13.1057	11.9347	11.2497	13.746	13.8099	13.4948	8.9141	13.6173	12.4166	12.54	11.9874	12.9289	13.2653	12.9626	12.6582	13.0209
3.8753	242.099	0.6159	0.6349	0.584	0.5912	0.563	0.4168	0.438	0.4088	0.5316	0.5369	0.9094	0.7906	1.0555	1.0004	0.9561	0.8555	0.8369	0.848	0.9066	0.9156	0.6931	0.6774	0.706	0.7015	0.6727	0.533	0.5442	0.5343	0.6293	0.6356	0.4982	0.5599	0.5436	0.6234	0.5507	0.5665
4.0586	169.048	1.9053	1.5465	1.9816	1.7971	1.8342	1.5627	1.6899	1.654	1.7464	1.7639	2.0641	1.38	1.5724	1.4487	1.6929	1.8415	1.1671	1.2466	1.5517	1.5672	1.955	1.5122	1.8883	1.7262	1.8253	1.6498	1.5738	1.5884	1.7069	1.7239	1.8243	1.7012	1.9223	2.2539	1.9062	1.9608
4.1487	242.099	0.6573	0.7664	0.7523	0.6585	0.7315	0.4427	0.6356	0.4599	0.638	0.6444	1.2965	1.3151	1.1536	1.1859	1.5927	1.0344	1.3354	1.4684	1.2978	1.3107	0.822	0.9088	0.8574	0.7996	0.9642	0.5982	0.8206	0.7361	0.8083	0.8164	0.6153	0.5774	0.6353	0.6087	0.6031	0.6204
4.1685	169.048	4.4748	3.949	4.444	3.5582	3.1047	3.7397	3.9113	3.6194	3.8501	3.8886	3.1385	3.2836	3.2713	3.6538	3.7282	2.9253	3.2971	3.18	3.3097	3.3428	4.16	3.8007	4.1703	3.6182	3.3118	3.5701	3.7945	3.5945	3.7349	3.7721	4.8128	4.4715	4.1953	4.2694	4.3929	4.5188
4.1693	187.059	0.415	0.4298	0.4078	0.3296	0.3512	0.4014	0.2924	0.3389	0.3708	0.3745	0.4084	0.4151	0.3678	0.3316	0.4821	0.504	0.4246	0.3638	0.4122	0.4163	0.4154	0.4282	0.3998	0.3334	0.3902	0.4317	0.3291	0.3539	0.3833	0.3871	0.5607	0.4973	0.5569	0.4663	0.5151	0.5299
4.1702	123.043	0.6465	0.6734	0.6645	0.4688	0.5072	0.683	0.5837	0.5045	0.5915	0.5974	0.3683	0.4331	0.4189	0.5118	0.5653	0.5269	0.4183	0.403	0.4557	0.4603	0.5795	0.6161	0.6058	0.4845	0.5298	0.6501	0.5475	0.4905	0.5604	0.566	0.5875	0.5563	0.5782	0.5196	0.5548	0.5707
4.1703	209.041	1.7891	1.5998	1.7932	1.5188	1.7651	1.4657	1.6829	1.7374	1.669	1.6857	1.6061	1.6767	1.4749	1.8828	1.864	1.4865	1.4283	1.4404	1.6075	1.6235	1.7519	1.6272	1.7219	1.6268	1.817	1.486	1.6351	1.7029	1.6627	1.6793	1.5031	1.6545	1.8126	1.5448	1.6125	1.6587
4.1706	151.038	2.0417	1.7766	2.0025	1.3487	1.6073	1.5951	1.5236	1.6344	1.6912	1.7081	1.2339	1.1602	1.2296	1.3811	1.4689	1.3658	1.2244	1.1121	1.272	1.2847	1.848	1.6298	1.8174	1.3704	1.5958	1.5529	1.4628	1.5382	1.5947	1.6105	1.974	1.8672	1.7917	1.624	1.7961	1.8475
4.202	154.098	0.5192	0.3972	0.4567	0.4426	0.4014	0.421	0.4535	0.316	0.426	0.4302	1.5767	1.5097	2.0391	1.4191	1.5432	1.3436	2.2957	1.9103	1.7047	1.7217	0.7889	0.6801	0.8586	0.696	0.7014	0.6607	0.9281	0.7424	0.7516	0.759	1.6473	1.9401	1.6376	1.2298	1.5976	1.6433
4.299	334.692	1.5635	1.4954	1.4277	1.3238	1.1767	1.7135	1.6137	1.5999	1.4893	1.5042	1.9073	1.685	1.8327	1.6445	1.671	1.8032	2.0094	1.6124	1.7707	1.7884	1.6582	1.5508	1.5372	1.4188	1.3216	1.7539	1.7311	1.6432	1.5687	1.5843	1.0316	1.1907	1.1922	1.4632	1.2072	1.2418
4.3051	414.617	0.3194	0.3101	0.3489	0.4696	0.4482	0.4139	0.4248	0.4052	0.3925	0.3964	0.3176	0.36	0.403	0.4475	0.3658	0.3988	0.4243	0.5216	0.4048	0.4089	0.3206	0.3243	0.3643	0.4687	0.4337	0.4143	0.429	0.4459	0.3978	0.4018	0.3907	0.3813	0.3362	0.3114	0.3514	0.3614
4.412	153.04	0.3019	0.1843	0.2421	0.1896	0.2908	0.2586	0.2177	0.1925	0.2347	0.237	0.2567	0.2479	0.2197	0.2055	0.1624	0.1876	0.1554	0.1743	0.2012	0.2032	0.292	0.2013	0.2377	0.1956	0.2621	0.2431	0.204	0.1925	0.2275	0.2298	0.2718	0.2655	0.2738	0.2697	0.2675	0.2752
4.5309	202.085	3.675	6.0981	3.8915	3.4582	4.4024	5.1444	3.8007	5.1051	4.4469	4.4914	3.2852	2.2633	2.7411	3.2793	3.4022	2.8679	3.8841	2.0948	2.9772	3.007	3.5951	5.1603	3.6206	3.4472	4.2109	4.6162	3.8608	4.4425	4.1001	4.1409	4.7441	4.5943	4.1325	4.8256	4.5284	4.6581
4.5681	651.221	0.0871	0.1394	0.08	0.0955	0.1034	0.1469	0.0932	0.1138	0.1074	0.1085	0.1227	0.0794	0.0943	0.0918	0.1224	0.0762	0.098	0.141	0.1032	0.1043	0.0965	0.1249	0.084	0.0955	0.1098	0.1304	0.0954	0.1238	0.1069	0.108	0.1156	0.1119	0.1087	0.0972	0.1073	0.1103
4.5689	205.096	71.9837	88.1188	76.7094	77.3606	76.896	80.1765	61.3616	84.3486	77.1194	77.8906	84.6971	68.514	63.2499	68.6802	75.8104	73.6813	68.918	79.7779	72.9161	73.6453	75.5577	83.6092	73.698	75.9207	77.7699	79.3377	63.9154	85.2575	76.4858	77.246	79.8312	72.8655	70.3707	66.762	71.7328	73.7882
4.5693	146.059	1.0786	1.3712	1.1451	1.2375	1.4353	1.3285	1.1055	1.1472	1.2311	1.2434	1.2827	1.1602	1.1003	1.1087	1.1729	1.091	1.0607	1.3645	1.1676	1.1793	1.1356	1.3248	1.1396	1.217	1.3893	1.2815	1.1054	1.2329	1.2219	1.2341	0.7487	0.8205	0.8475	0.8469	0.8077	0.8309
4.5698	159.091	0.851	1.0638	0.7608	1.0147	1.0573	0.8685	0.6459	0.9671	0.9036	0.9127	0.9646	0.7692	0.7072	0.7517	0.9228	1.0037	0.7233	0.7749	0.8272	0.8354	0.884	0.9947	0.7511	0.9578	1.0385	0.9119	0.6722	0.9408	0.8893	0.8982	0.86	0.8467	0.8896	0.6541	0.8045	0.8275
4.5704	132.078	0.3128	0.3775	0.3614	0.3621	0.2943	0.2914	0.3014	0.3483	0.3312	0.3345	0.3351	0.3171	0.2917	0.2621	0.327	0.3857	0.4015	0.2879	0.326	0.3293	0.32	0.3641	0.3456	0.3402	0.3071	0.3184	0.33	0.3412	0.3317	0.335	0.3699	0.3962	0.348	0.3047	0.3512	0.3612
4.5812	188.072	76.7659	92.096	82.3719	81.466	82.5121	85.1507	65.653	90.2244	82.03	82.8503	82.2188	66.1363	65.1298	64.2041	72.2483	68.3976	65.4805	74.0153	69.7288	70.4261	78.5306	86.0017	78.4339	77.8789	81.1069	81.7458	66.2789	88.2251	79.3767	80.1658	71.836	66.1114	64.7497	62.8959	65.7343	67.6178
4.6131	166.085	59.1729	49.6918	53.8539	52.779	53.4642	49.2988	30.3513	49.1971	49.7261	50.2234	42.7166	30.6555	55.0975	50.1116	35.2089	39.6539	44.8286	48.1875	43.3075	43.7406	55.3161	45.1336	54.4399	52.6266	49.5654	47.3414	34.3542	50.162	48.3802	48.8611	47.8512	44.312	43.0937	45.5402	44.7473	46.0295
4.6564	205.096	35.81	46.7386	31.1589	37.9183	35.4611	34.463	44.6642	34.6275	37.6052	37.9813	42.3347	42.4232	39.6158	28.3509	38.6937	38.2716	39.0583	32.6072	37.6694	38.0461	37.6385	45.8827	33.4518	35.8578	36.8254	35.7862	43.6899	34.9629	37.8306	38.2065	64.4618	67.7893	68.6431	65.2455	65.8696	67.757
4.685	711.068	0.2823	0.3216	0.2679	0.266	0.2365	0.3082	0.3558	0.3559	0.2993	0.3023	0.3386	0.2477	0.2956	0.2463	0.2939	0.4061	0.3353	0.2847	0.306	0.3091	0.2979	0.3045	0.2762	0.2637	0.2548	0.3363	0.3542	0.3461	0.3026	0.3057	0.2047	0.1969	0.2834	0.2519	0.2319	0.2385
4.6907	713.063	0.4886	0.4243	0.3184	0.317	0.3566	0.355	0.283	0.3227	0.3582	0.3618	0.2766	0.3151	0.2789	0.3807	0.2985	0.2619	0.3864	0.3365	0.3168	0.32	0.4375	0.3988	0.31	0.3364	0.347	0.3349	0.3123	0.3344	0.3497	0.3532	0.3605	0.2986	0.2965	0.3674	0.3274	0.3368
4.7321	188.07	17.4851	21.0637	19.0431	17.1797	22.1721	15.2709	24.8976	17.5054	19.3272	19.5205	20.2482	21.0794	27.5147	29.9041	21.484	19.3469	25.7895	32.1963	24.6954	24.9423	18.2712	21.173	21.2786	20.5962	22.3275	16.4665	25.3792	21.7994	20.7917	20.9982	20.1747	19.4368	19.1284	21.2006	19.7853	20.3522
4.7565	227.078	1.2265	1.0219	1.1497	1.4147	1.3619	1.5068	1.3997	1.2657	1.2934	1.3063	1.272	1.2602	1.1689	1.7359	1.3319	1.4276	1.3539	1.3011	1.3564	1.37	1.2442	1.0872	1.1603	1.5108	1.3746	1.502	1.4023	1.3066	1.3165	1.3296	1.2906	1.1304	1.2031	1.2362	1.2029	1.2374
4.7652	307.018	1.13	1.1494	0.9515	1.0646	1.1341	1.1486	0.8458	1.1397	1.0705	1.0812	0.8499	1.1356	0.7795	1.3021	1.223	0.9645	1.1494	0.924	1.041	1.0514	1.065	1.1517	0.9129	1.1358	1.174	1.1134	0.9319	1.1116	1.069	1.0796	0.922	0.9077	0.931	0.932	0.9139	0.9401
4.864	556.642	0.316	0.3758	0.2935	0.2722	0.32	0.242	0.344	0.2863	0.3062	0.3093	0.3212	0.2997	0.3377	0.3685	0.2906	0.3384	0.4039	0.4175	0.3472	0.3507	0.3189	0.3585	0.3061	0.2995	0.3172	0.269	0.3628	0.3279	0.3183	0.3214	0.3715	0.416	0.3407	0.3446	0.3645	0.375
4.8779	558.638	0.3465	0.3316	0.3765	0.2868	0.3243	0.255	0.3374	0.3234	0.3227	0.3259	0.3214	0.3445	0.3394	0.4588	0.3132	0.4112	0.3911	0.4378	0.3772	0.3809	0.3419	0.3365	0.369	0.3336	0.3263	0.2974	0.3545	0.3615	0.3383	0.3416	0.4097	0.4688	0.3804	0.3599	0.4007	0.4121
4.878	614.598	0.4328	0.4558	0.4232	0.3523	0.4282	0.3132	0.363	0.4024	0.3964	0.4003	0.3833	0.3775	0.4588	0.5433	0.3613	0.3982	0.4862	0.5423	0.4439	0.4483	0.4225	0.4383	0.4343	0.4045	0.4174	0.3381	0.3981	0.4492	0.4106	0.4147	0.3663	0.4026	0.4065	0.399	0.3897	0.4008
4.8787	616.597	0.5439	0.4352	0.5171	0.4236	0.5161	0.3765	0.5522	0.4478	0.4766	0.4813	0.4678	0.5305	0.534	0.511	0.4936	0.534	0.505	0.6187	0.5243	0.5296	0.5274	0.4614	0.524	0.4501	0.518	0.4205	0.5458	0.5039	0.4913	0.4962	0.4727	0.552	0.411	0.5007	0.4793	0.493
4.8805	674.553	0.5081	0.4649	0.3725	0.419	0.4719	0.4178	0.3311	0.367	0.419	0.4232	0.3804	0.4414	0.4053	0.4549	0.4158	0.3919	0.4955	0.4852	0.4338	0.4381	0.4784	0.4613	0.3826	0.4323	0.4645	0.4155	0.3764	0.4072	0.4251	0.4293	0.4066	0.4725	0.359	0.45	0.4178	0.4298
4.8812	672.553	0.3204	0.3283	0.2912	0.3502	0.4365	0.3539	0.2588	0.2814	0.3276	0.3309	0.3229	0.3576	0.346	0.3707	0.2791	0.316	0.3675	0.3614	0.3402	0.3436	0.3226	0.3373	0.3065	0.3589	0.4025	0.3478	0.2892	0.3094	0.3326	0.3359	0.3275	0.425	0.3973	0.3019	0.3593	0.3696
4.8815	496.672	0.3016	0.2268	0.2552	0.2905	0.2965	0.3196	0.3393	0.267	0.2871	0.2899	0.2919	0.3698	0.2849	0.3487	0.3319	0.3396	0.3481	0.3375	0.3316	0.3349	0.3007	0.2641	0.264	0.3082	0.3101	0.328	0.345	0.2922	0.2999	0.3029	0.3184	0.3051	0.3198	0.2802	0.3028	0.3115
4.8842	160.096	0.5006	0.3116	0.3992	0.4599	0.2979	0.5691	0.4074	0.386	0.4165	0.4206	0.452	0.5288	0.5974	0.4979	0.5186	0.5964	0.3306	0.4817	0.5004	0.5054	0.4909	0.368	0.4513	0.4742	0.3592	0.5819	0.392	0.4208	0.44	0.4444	0.5119	0.5384	0.3851	0.4598	0.4691	0.4825
4.8862	261.144	2.6779	2.5755	2.7685	2.1341	2.1049	2.0265	1.6737	2.0438	2.2506	2.2731	2.4376	1.9736	3.4317	3.171	2.6724	2.5644	1.8612	2.5011	2.5766	2.6024	2.6307	2.4364	2.95	2.4199	2.2826	2.1844	1.7386	2.2149	2.3455	2.3688	1.7874	2.0554	1.6723	1.7588	1.8003	1.8519
4.8864	486.652	0.5913	0.6044	0.4714	0.537	0.5842	0.5742	0.4191	0.4613	0.5304	0.5357	0.5727	0.5623	0.5979	0.6677	0.6093	0.6458	0.6239	0.6518	0.6164	0.6226	0.5896	0.5968	0.5057	0.5757	0.5994	0.5983	0.4756	0.5228	0.5551	0.5606	0.5695	0.5181	0.5486	0.5348	0.5373	0.5527
4.8881	428.698	0.9791	0.8333	0.903	0.7864	0.956	0.699	0.9714	0.9494	0.8847	0.8936	0.966	1.0641	0.9771	1.1078	0.9787	1.0155	1.1261	1.1271	1.0453	1.0558	0.9807	0.8957	0.9263	0.8762	0.9762	0.7869	1.0208	1.0198	0.9302	0.9395	0.9568	0.9914	0.9509	1.0991	0.9896	1.0179
4.8888	840.398	0.5046	0.3897	0.4576	0.3843	0.4861	0.3416	0.4542	0.4408	0.4324	0.4367	0.454	0.4481	0.4931	0.5672	0.4919	0.4728	0.5393	0.5195	0.4982	0.5032	0.4944	0.4064	0.4689	0.4348	0.4949	0.3786	0.4805	0.4725	0.4514	0.4559	0.2413	0.2822	0.3342	0.2872	0.2834	0.2915
4.8892	256.82	1.171	1.1446	1.0162	0.9303	1.0955	0.827	1.0843	1.104	1.0466	1.0571	1.1909	1.1696	1.2586	1.2856	1.2351	1.2776	1.2617	1.3914	1.2588	1.2714	1.1819	1.1566	1.0825	1.0302	1.1479	0.9504	1.1406	1.207	1.1061	1.1171	1.2609	1.2641	1.2429	1.1889	1.2268	1.262
4.8894	430.695	1.991	1.8027	2.1447	1.6879	2.0644	1.5004	1.9889	2.0112	1.8989	1.9179	2.1666	2.1871	2.2617	2.3824	2.3229	2.3689	2.4885	2.4137	2.324	2.3472	2.0454	1.9088	2.1851	1.8819	2.1619	1.7372	2.1366	2.1671	2.0169	2.0369	2.0414	2.1019	2.2805	1.9106	2.0628	2.1219
4.8895	80.9468	1.8554	1.6911	1.5195	1.8756	1.8402	1.8626	1.3507	1.6805	1.7094	1.7265	1.5559	1.5886	1.6953	1.7672	1.6755	1.854	1.8137	1.9469	1.7371	1.7545	1.7891	1.6737	1.5716	1.8667	1.8254	1.8794	1.4826	1.7924	1.726	1.7431	1.5526	1.4765	1.1703	1.8908	1.5073	1.5505
4.8897	488.654	1.3831	1.3573	1.1537	1.3686	1.3649	1.3971	1.0255	1.3329	1.2979	1.3109	1.3713	1.5085	1.5057	1.7237	1.4271	1.6511	1.6526	1.5551	1.5494	1.5649	1.3871	1.4023	1.2484	1.4728	1.4014	1.4762	1.1959	1.4246	1.3687	1.3823	1.3352	1.4905	1.3008	1.315	1.3468	1.3854
4.8903	1012.28	0.264	0.3267	0.2498	0.2896	0.3204	0.2917	0.222	0.2839	0.281	0.2838	0.2873	0.291	0.332	0.3335	0.3367	0.3299	0.3523	0.3227	0.3232	0.3264	0.2712	0.3193	0.2718	0.3037	0.3294	0.3044	0.2575	0.3012	0.2932	0.2961	0.2808	0.2981	0.29	0.3067	0.291	0.2993
4.8905	370.74	0.4394	0.4456	0.4616	0.3722	0.4559	0.3309	0.438	0.4065	0.4188	0.423	0.4394	0.4664	0.4532	0.5087	0.4797	0.4955	0.4873	0.5637	0.4867	0.4916	0.4416	0.4531	0.4618	0.4108	0.4689	0.3762	0.455	0.4579	0.4383	0.4426	0.3811	0.4678	0.3233	0.4632	0.4048	0.4164
4.8913	196.864	2.1263	1.7976	1.9753	1.687	1.956	1.4995	2.1684	1.9726	1.8978	1.9168	2.0604	2.0558	2.0592	2.2985	2.1541	2.3064	2.4298	2.3945	2.2198	2.242	2.1204	1.8718	2.0065	1.8598	2.0364	1.7207	2.2572	2.1327	1.9898	2.0096	1.8889	2.0098	1.9757	1.7857	1.8959	1.9502
4.8922	200.858	0.6639	0.6621	0.5674	0.7165	0.6558	0.6731	0.5043	0.6631	0.6383	0.6447	0.6838	0.6888	0.7329	0.8136	0.6863	0.7925	0.7843	0.826	0.751	0.7585	0.6723	0.6722	0.612	0.7484	0.6735	0.7104	0.5809	0.7224	0.6703	0.677	0.5718	0.609	0.613	0.577	0.5868	0.6036
4.8926	318.772	0.5601	0.5219	0.4284	0.5477	0.4638	0.4993	0.3808	0.4538	0.482	0.4868	0.4771	0.5384	0.5391	0.5558	0.5324	0.5737	0.5803	0.5281	0.5406	0.546	0.542	0.5287	0.4585	0.5552	0.4884	0.5234	0.4356	0.4846	0.4995	0.5044	0.4394	0.3528	0.3271	0.361	0.3664	0.3769
4.8927	956.314	0.7099	0.615	0.5331	0.7037	0.7192	0.7541	0.5997	0.7629	0.6747	0.6815	0.7146	0.7701	0.743	0.6642	0.7455	0.8369	0.7904	0.7693	0.7543	0.7618	0.7147	0.6572	0.5888	0.7007	0.7368	0.7829	0.6545	0.7837	0.6986	0.7055	0.6146	0.5807	0.6347	0.617	0.6056	0.623
4.8932	666.522	1.0948	1.0639	0.904	1.1107	1.1495	1.0789	0.8036	0.9309	1.017	1.0272	0.8107	1.1254	1.1079	1.2763	1.167	1.3086	1.2199	1.2751	1.1614	1.173	1.0286	1.0847	0.9601	1.164	1.1712	1.1485	0.918	1.0445	1.0592	1.0697	0.3646	0.3575	0.3673	0.3976	0.368	0.3786
4.8938	490.65	1.4871	1.1122	1.2513	1.4953	1.569	1.5559	1.4693	1.3213	1.4077	1.4218	1.5358	1.7433	1.6014	1.7555	1.6119	1.709	1.8354	1.7607	1.6941	1.7111	1.5069	1.2771	1.346	1.5766	1.6036	1.6108	1.5777	1.4697	1.4879	1.5027	1.3519	1.4312	1.4179	1.482	1.4065	1.4468
4.8939	198.861	1.9506	1.9148	1.66	2.0236	2.0868	2.0812	1.4756	1.7474	1.8675	1.8862	1.9926	2.1103	2.1926	2.2553	1.9754	2.1928	2.1966	2.427	2.1678	2.1895	1.9711	1.9737	1.8029	2.1029	2.0894	2.1309	1.6745	1.9695	1.9538	1.9732	1.8398	2.0306	1.8539	1.8534	1.8755	1.9292
4.8948	958.312	0.7868	0.6594	0.7338	0.6283	0.7102	0.5585	0.7761	0.8017	0.7069	0.7139	0.7921	0.76	0.757	0.878	0.8799	0.8525	0.8985	0.8026	0.8276	0.8359	0.7921	0.6881	0.7434	0.6983	0.7646	0.6392	0.8152	0.822	0.7413	0.7487	0.7219	0.7023	0.7773	0.7073	0.7199	0.7406
4.8957	724.481	0.738	0.5634	0.6338	0.7694	0.8116	0.8531	0.717	0.618	0.713	0.7202	0.823	0.8988	0.8581	0.9343	0.942	0.886	1.1222	0.8024	0.9084	0.9174	0.7632	0.6509	0.6937	0.8191	0.8574	0.8702	0.8277	0.6819	0.7664	0.774	0.7238	0.716	0.7611	0.7288	0.7251	0.7459
4.8966	1134.19	0.3544	0.2512	0.2826	0.3368	0.3596	0.3437	0.3692	0.246	0.3179	0.3211	0.3674	0.4014	0.3426	0.2566	0.348	0.4967	0.4314	0.4287	0.3841	0.3879	0.3595	0.2904	0.2992	0.3197	0.362	0.3862	0.3888	0.3001	0.3364	0.3398	0.3066	0.3974	0.3035	0.3052	0.3249	0.3342
4.8975	1076.23	0.2735	0.3275	0.2531	0.3116	0.2759	0.3741	0.225	0.2375	0.2848	0.2876	0.3595	0.3481	0.3803	0.3778	0.3464	0.3189	0.3777	0.3486	0.3572	0.3607	0.2966	0.3343	0.2865	0.3316	0.2982	0.3638	0.2663	0.2726	0.3047	0.3077	0.2799	0.306	0.3053	0.3737	0.3131	0.322
4.901	498.682	0.3989	0.3494	0.393	0.3976	0.5387	0.4826	0.4426	0.5345	0.4422	0.4466	0.435	0.3704	0.4931	0.5105	0.3806	0.4611	0.503	0.593	0.4683	0.473	0.41	0.3564	0.4203	0.4304	0.5061	0.482	0.4625	0.5632	0.4512	0.4557	0.4526	0.4286	0.4002	0.4431	0.4268	0.439
4.9019	440.723	0.5421	0.5966	0.5567	0.4777	0.5931	0.4246	0.6176	0.4908	0.5374	0.5428	0.5823	0.5218	0.5167	0.6085	0.4829	0.5883	0.5884	0.7838	0.5841	0.5899	0.555	0.5807	0.5494	0.5158	0.5736	0.4707	0.6165	0.58	0.5522	0.5577	0.6112	0.5244	0.4672	0.474	0.514	0.5287
4.9085	438.728	0.2311	0.3221	0.3181	0.2336	0.3499	0.2077	0.2161	0.2239	0.2628	0.2654	0.3287	0.2308	0.2924	0.3124	0.2294	0.331	0.2926	0.4391	0.3071	0.3101	0.2569	0.3007	0.3132	0.256	0.3241	0.2412	0.2378	0.286	0.2755	0.2782	0.2767	0.2388	0.2176	0.213	0.2342	0.2409
4.9097	324.807	0.4443	0.4545	0.424	0.5586	0.4949	0.4751	0.3769	0.5876	0.477	0.4818	0.4144	0.4069	0.4929	0.5484	0.4228	0.4718	0.4599	0.6052	0.4778	0.4826	0.439	0.4448	0.4435	0.5616	0.4838	0.4791	0.4019	0.6069	0.4798	0.4846	0.4681	0.4389	0.4613	0.4067	0.4393	0.4519
4.9099	382.766	0.4266	0.4951	0.6118	0.4309	0.5694	0.383	0.5084	0.4526	0.4847	0.4896	0.4342	0.4511	0.456	0.5021	0.4148	0.4538	0.4706	0.6177	0.475	0.4798	0.4307	0.4865	0.5755	0.4533	0.5381	0.405	0.5039	0.5073	0.485	0.4898	0.4842	0.4123	0.3719	0.942	0.5471	0.5628
4.9154	206.893	1.048	0.9757	0.8884	0.9607	1.2228	0.913	0.7897	1.1971	0.9994	1.0094	0.9897	0.9907	0.9823	1.1266	0.8937	1.0247	1.0694	1.317	1.0493	1.0598	1.0386	0.9844	0.9166	1.0126	1.1564	0.9508	0.8691	1.2585	1.0176	1.0277	0.9365	0.9045	0.8993	1.0367	0.9348	0.9616
4.9488	183.064	1.2821	1.1705	1.2134	1.0837	1.0372	0.9122	1.057	1.0882	1.1055	1.1166	0.5946	0.9736	0.9069	1.0574	0.956	0.9261	0.746	0.8875	0.881	0.8898	1.115	1.1266	1.1421	1.0878	1.0318	0.9251	0.9884	1.0627	1.0549	1.0654	1.0719	1.199	1.1536	1.0515	1.1078	1.1396
4.9535	301.14	0.3515	0.3646	0.3866	0.5303	0.535	0.4699	0.3437	0.4981	0.435	0.4393	0.4297	0.3935	0.5038	0.4408	0.4357	0.3172	0.4437	0.4969	0.4327	0.437	0.373	0.3737	0.4182	0.5128	0.5175	0.4357	0.3727	0.5102	0.4368	0.4411	0.512	0.4325	0.4526	0.4174	0.4491	0.462
4.9545	223.056	0.5035	0.5868	0.5507	0.4682	0.5243	0.525	0.5587	0.5134	0.5288	0.5341	0.4204	0.4457	0.4292	0.5237	0.5996	0.549	0.4088	0.409	0.4732	0.4779	0.4851	0.5541	0.5228	0.487	0.5516	0.5365	0.5262	0.4988	0.5177	0.5228	0.4545	0.5279	0.5362	0.4555	0.4886	0.5026
4.9694	392.796	0.2997	0.2598	0.1966	0.2091	0.1858	0.2511	0.2194	0.2601	0.2352	0.2376	0.2484	0.3285	0.3025	0.2417	0.3994	0.3008	0.3464	0.2635	0.3039	0.3069	0.2883	0.2784	0.2243	0.2195	0.2436	0.2663	0.254	0.2675	0.2539	0.2564	0.2705	0.268	0.2145	0.214	0.2393	0.2462
4.9761	218.101	0.6252	0.3957	0.4091	0.5635	0.6763	0.7353	0.7469	0.6576	0.6012	0.6072	0.6806	0.6579	0.7666	0.852	0.7172	0.7166	0.4248	0.6574	0.6841	0.691	0.6423	0.4639	0.5014	0.6427	0.697	0.738	0.6724	0.674	0.6255	0.6317	0.7306	0.6024	0.5746	0.7432	0.6561	0.6749
4.9776	132.104	22.4374	21.2122	33.4843	22.4614	28.1308	22.908	21.5524	29.0732	25.3917	25.8666	25.1457	25.0902	24.7868	20.0893	19.6728	17.0655	20.5669	27.6856	22.7516	22.9281	23.2346	22.2975	31.4571	22.0812	26.3749	21.6513	21.5209	29.4358	24.8655	25.2661	34.7086	34.9467	33.8359	31.2968	33.36	34.3159
4.9817	253.07	0.5453	0.5223	0.668	0.3705	0.4158	0.4652	0.5282	0.4061	0.4902	0.4951	0.2434	0.3442	0.3481	0.3588	0.4242	0.4343	0.3434	0.2684	0.3456	0.3491	0.4718	0.4799	0.5906	0.3712	0.4242	0.4621	0.4864	0.3801	0.4564	0.4609	0.4243	0.3884	0.5174	0.4369	0.4373	0.4499
4.9855	283.162	16.7057	10.8275	16.212	11.7415	10.4369	13.7832	15.203	10.7638	13.2092	13.3413	15.4288	15.4762	17.0409	15.2259	15.0779	14.6517	16.5433	11.7814	15.1533	15.3048	16.4676	12.0554	16.5032	12.7474	11.7885	14.1454	15.7	11.3	13.7741	13.9109	12.1928	13.4442	12.2352	12.2927	12.4158	12.7716
4.9901	132.102	3.542	6.2048	3.9676	6.0976	6.5072	5.9248	5.5936	5.6036	5.4302	5.4845	3.8664	2.8676	2.6348	3.1136	2.6296	2.4616	2.632	2.1112	2.7896	2.8175	3.6418	5.3932	3.6511	5.3977	5.6063	5.1018	4.8952	4.8269	4.7929	4.8405	3.746	3.9874	3.8752	3.8537	3.8269	3.9366
4.9905	546.831	0.3095	0.3906	0.2747	0.4174	0.3982	0.3589	0.3091	0.3233	0.3477	0.3512	0.3613	0.4365	0.4295	0.3825	0.5576	0.4829	0.4098	0.3911	0.4314	0.4357	0.3241	0.4041	0.3152	0.4127	0.4452	0.3942	0.3379	0.3492	0.3708	0.3745	0.3645	0.2904	0.2457	0.3157	0.301	0.3097
4.9909	216.922	2.9313	2.8945	2.2812	3.3282	2.8186	3.4233	2.5664	2.8537	2.8871	2.916	3.4364	3.3072	3.7834	3.3672	3.8068	3.6686	3.9932	3.3475	3.5888	3.6247	3.0737	3.0132	2.6721	3.3714	3.1153	3.5208	2.9565	3.0547	3.0806	3.1112	2.2158	2.6519	2.474	2.9668	2.5514	2.6245
4.9962	478.846	0.3339	0.3916	0.2965	0.4665	0.4135	0.4449	0.3336	0.3216	0.3753	0.379	0.406	0.5531	0.4762	0.3599	0.6088	0.4661	0.4988	0.4334	0.4753	0.48	0.3538	0.4343	0.3434	0.444	0.47	0.4548	0.3791	0.359	0.4026	0.4066	0.3433	0.3191	0.3334	0.417	0.3497	0.3597
5.0059	682.803	0.3298	0.2594	0.2517	0.3773	0.3327	0.3816	0.2831	0.3327	0.3185	0.3217	0.3619	0.4221	0.3865	0.3372	0.4913	0.396	0.4447	0.3885	0.4035	0.4076	0.3396	0.3018	0.287	0.3708	0.3785	0.3892	0.3272	0.3557	0.3418	0.3452	0.2858	0.2522	0.2718	0.2709	0.2675	0.2751
5.0139	420.884	0.9631	1.1359	0.8434	1.2824	1.1679	1.1436	0.9488	1.0544	1.0674	1.0781	1.3377	1.3176	1.3738	1.3141	1.4504	1.4795	1.3961	1.2433	1.3641	1.3777	1.0626	1.1875	0.9816	1.3033	1.2582	1.241	1.0726	1.1303	1.1484	1.1598	1.0931	0.9333	0.9228	0.9973	0.9768	1.0047
5.0194	208.054	0.387	0.3193	0.405	0.316	0.2809	0.4295	0.4442	0.2622	0.3555	0.3591	0.3457	0.3837	0.3394	0.267	0.2293	0.3931	0.3064	0.274	0.3173	0.3205	0.3785	0.3372	0.3905	0.3067	0.2718	0.4246	0.4136	0.2719	0.3478	0.3513	0.2547	0.3032	0.2474	0.316	0.2775	0.2855
5.0215	344.029	0.782	0.5605	0.6652	0.4993	0.4438	0.5826	0.5853	0.3749	0.5617	0.5673	0.5829	0.5549	0.7179	0.4005	0.3775	0.5246	0.5434	0.4957	0.5247	0.5299	0.7357	0.5619	0.6819	0.4791	0.4334	0.5737	0.5806	0.416	0.5555	0.561	0.4316	0.4283	0.4744	0.4756	0.448	0.4608
5.0398	413.14	0.2178	0.2002	0.1939	0.2419	0.1581	0.2526	0.234	0.2228	0.2152	0.2173	0.3113	0.356	0.307	0.3335	0.4296	0.3965	0.3083	0.4411	0.3604	0.364	0.2425	0.2405	0.2234	0.2677	0.2304	0.2919	0.2553	0.2857	0.2531	0.2556	0.1885	0.2394	0.1776	0.1815	0.1948	0.2004
5.0465	261.144	2.9838	2.503	2.848	1.9675	2.485	2.591	2.2316	2.5798	2.5237	2.5489	3.3349	3.6916	4.2213	3.8534	4.584	3.5469	2.8248	4.0147	3.759	3.7965	3.0875	2.8156	3.2092	2.4681	3.0628	2.8613	2.4057	3.021	2.85	2.8783	2.4213	2.3225	2.4692	2.488	2.401	2.4698
5.0586	896.794	0.687	0.9352	0.634	0.8608	0.9325	0.8832	0.7132	0.7731	0.8024	0.8104	1.0276	1.0321	1.028	0.9183	1.0394	1.0574	1.1228	0.9963	1.0277	1.038	0.7765	0.9643	0.7367	0.8841	0.974	0.9367	0.825	0.851	0.8638	0.8724	0.815	0.7431	0.8186	0.7938	0.7847	0.8072
5.0716	556.857	0.7035	1	0.6541	1.0404	0.8212	0.8353	0.7359	0.8326	0.8279	0.8362	0.9496	1.016	0.9241	0.876	1.0566	1.1004	1.1268	0.9891	1.0048	1.0149	0.7692	1.009	0.7256	1.0089	0.8941	0.9115	0.8431	0.8945	0.8772	0.8859	0.7063	0.7649	0.7649	0.7323	0.7347	0.7557
5.0747	692.832	0.9109	0.7146	0.6615	0.9624	0.8546	0.9518	0.7442	0.8978	0.8372	0.8456	1.0872	1.0215	1.0815	0.9755	1.2195	1.1524	1.197	1.0418	1.0971	1.108	0.96	0.7957	0.7709	0.9754	0.9614	1.0127	0.8673	0.958	0.9076	0.9166	0.7242	0.6445	0.7986	0.6969	0.7089	0.7292
5.0833	1003.79	0.4939	0.4446	0.3739	0.5123	0.54	0.5342	0.4206	0.4658	0.4732	0.4779	0.5679	0.6022	0.485	0.4973	0.6305	0.5493	0.5748	0.4842	0.5489	0.5544	0.5151	0.4866	0.4038	0.5136	0.5714	0.5435	0.4642	0.4823	0.4949	0.4999	0.4925	0.4277	0.405	0.4366	0.436	0.4485
5.0941	1037.78	0.4681	0.4036	0.3497	0.5016	0.3966	0.5333	0.3934	0.4943	0.4426	0.447	0.4495	0.5098	0.5031	0.4161	0.5602	0.5817	0.5607	0.4014	0.4978	0.5028	0.4658	0.4324	0.3902	0.4848	0.4447	0.5511	0.4401	0.4823	0.459	0.4636	0.3128	0.4591	0.314	0.352	0.3559	0.3661
5.0985	901.807	0.4943	0.5404	0.4368	0.657	0.5894	0.5891	0.4913	0.6238	0.5528	0.5583	0.5387	0.5399	0.5793	0.4284	0.6645	0.6032	0.7128	0.5622	0.5786	0.5844	0.508	0.543	0.475	0.6053	0.6176	0.5987	0.5529	0.6232	0.5624	0.568	0.4476	0.4274	0.4486	0.3761	0.4207	0.4327
5.1081	969.796	0.4343	0.5156	0.3947	0.5791	0.5457	0.525	0.444	0.5576	0.4995	0.5045	0.5626	0.5605	0.6203	0.5044	0.5236	0.57	0.5473	0.5811	0.5587	0.5643	0.4689	0.5295	0.4536	0.5658	0.5482	0.5418	0.4749	0.5777	0.5172	0.5224	0.3027	0.4548	0.4518	0.4663	0.4147	0.4266
5.1231	236.127	1.1607	1.1678	1.0924	0.8106	1.2474	0.7735	0.9878	1.0935	1.0417	1.0521	0.719	1.0694	1.1926	1.2507	1.0209	0.8412	0.8703	0.9921	0.9945	1.0045	1.055	1.1488	1.1232	0.9309	1.2078	0.7987	0.9679	1.0942	1.0356	1.0459	1.0275	0.9854	1.0241	1.0599	1.014	1.043
5.171	1076.79	2.0467	1.932	1.6474	1.8992	2.0266	1.8882	1.4644	1.9222	1.8533	1.8719	2.0561	1.8856	2.0164	2.1816	1.8722	2.0034	1.9962	1.9608	1.9965	2.0165	2.0594	1.9299	1.7489	1.9902	2.0172	1.9369	1.615	1.9804	1.8998	1.9187	1.968	2.0818	1.8486	1.836	1.9143	1.9691
5.1822	1008.8	2.5278	2.3781	2.0616	2.4434	2.7105	2.3645	1.8325	2.2357	2.3193	2.3425	2.42	2.2457	2.1658	2.7656	2.3098	2.5202	2.4128	2.6457	2.4357	2.4601	2.5133	2.3566	2.0983	2.55	2.648	2.4283	1.9992	2.3992	2.3616	2.3851	2.304	2.3255	2.4278	2.0916	2.2644	2.3292
5.1836	1144.78	1.6669	1.24	1.395	1.6062	1.7402	1.6824	1.5997	1.6244	1.5693	1.585	1.6098	1.6284	1.722	1.8055	1.5813	1.876	1.7949	1.7493	1.7209	1.7381	1.6609	1.3443	1.4846	1.6731	1.7254	1.749	1.6658	1.6978	1.6164	1.6324	1.6726	1.9088	1.58	1.5153	1.6525	1.6998
5.1837	668.868	0.7508	0.8642	0.6956	0.8473	0.8976	0.8694	0.6183	0.7171	0.7825	0.7904	0.6105	0.5577	0.576	0.7081	0.6765	0.6198	0.6368	0.6779	0.6329	0.6392	0.7192	0.7911	0.6689	0.8203	0.8541	0.8146	0.6293	0.7247	0.7491	0.7565	0.7995	0.8162	0.6796	0.6797	0.7363	0.7574
5.1839	634.874	7.0661	6.6443	7.3002	5.995	7.2457	5.3289	7.2042	7.1706	6.7444	6.8118	7.6226	7.4351	7.6653	8.7037	7.2592	8.2525	7.9286	8.005	7.859	7.9376	7.2423	6.8772	7.4293	6.7457	7.3579	6.1291	7.4625	7.5689	7.0636	7.1338	7.265	7.0715	7.0012	6.6339	6.923	7.1213
5.184	872.829	2.9152	2.9842	3.3464	2.6585	3.2858	2.3631	3.3276	3.0454	2.9908	3.0207	3.1311	3.2233	3.2175	3.527	3.3051	3.7085	3.1689	3.1011	3.2978	3.3308	2.9844	3.0595	3.3308	2.9065	3.3401	2.7304	3.3211	3.1362	3.085	3.1157	2.9468	3.4484	3.0885	2.9975	3.0891	3.1776
5.1845	1110.79	3.8946	2.7915	3.1404	3.5645	4.0002	3.7571	3.63	3.4855	3.533	3.5683	3.9987	3.7306	3.9412	4.5075	3.834	4.1144	4.4069	3.9379	4.0589	4.0995	3.9406	3.0426	3.3585	3.8406	4.0174	3.8866	3.8652	3.6914	3.6856	3.7222	3.3477	3.7442	3.7462	3.5442	3.5596	3.6616
5.1848	736.854	2.0707	1.4707	1.6545	1.8591	2.0473	1.8771	2.0852	1.8262	1.8614	1.88	1.6405	1.601	1.6717	2.0748	1.6185	1.8442	1.7853	1.964	1.775	1.7928	1.9725	1.511	1.6672	1.9327	1.9676	1.8879	2.03	1.908	1.8499	1.8683	1.4749	1.5295	1.7242	1.5959	1.5653	1.6102
5.185	940.816	2.7604	2.7365	2.9863	2.4629	3.1733	2.1892	3.0584	2.7988	2.7707	2.7984	2.8446	2.8551	2.9155	3.4379	2.7289	2.722	2.907	3.1653	2.947	2.9765	2.7956	2.7801	2.9835	2.7361	3.1065	2.3475	3.051	2.965	2.8307	2.8588	2.8845	2.7881	2.9141	2.4731	2.7373	2.8157
5.1855	702.861	6.9225	6.7859	5.763	6.9239	6.9147	7.0068	5.1227	6.4275	6.4834	6.5482	6.781	6.8098	7.0485	7.7815	6.5888	7.2512	7.109	6.933	7.0379	7.1082	6.9217	6.8259	6.1167	7.2118	6.9345	7.1406	5.6817	6.7209	6.6596	6.7258	6.2783	6.7802	6.3772	6.0041	6.2964	6.4768
5.1857	838.836	6.807	7.0776	7.3843	6.0182	7.3474	5.3495	7.1074	7.0726	6.7705	6.8382	7.596	7.6103	7.6939	8.8381	7.8806	8.4474	8.0913	7.6098	7.9709	8.0506	7.0406	7.2475	7.4998	6.7975	7.5949	6.1944	7.4309	7.3904	7.1116	7.1823	7.3429	6.8104	6.9924	6.7593	6.9065	7.1044
5.1862	1178.77	3.6949	2.5476	2.8661	3.3779	3.5904	3.1834	3.4684	3.066	3.2243	3.2566	3.5415	3.419	3.7597	3.8583	3.2965	3.822	3.8995	3.5313	3.641	3.6774	3.6748	2.7804	3.1062	3.5342	3.5686	3.3788	3.6138	3.2648	3.3476	3.3809	3.1081	3.1038	3.0036	3.0336	3.0317	3.1185
5.1864	105.032	2.6439	2.3188	2.8243	3.1148	2.1034	2.0951	2.5254	1.6041	2.4037	2.4278	7.3244	7.5978	5.091	4.8532	7.3289	6.4322	7.4245	7.6807	6.7166	6.7838	3.8392	3.6633	3.411	3.5892	3.4805	3.2229	3.8009	3.2393	3.5073	3.5421	2.8366	2.6898	3.0867	2.4642	2.7416	2.8202
5.1866	804.841	2.8232	2.5577	2.579	2.3315	2.9965	2.0724	2.8574	2.7654	2.6229	2.6491	2.7659	2.7449	2.6828	3.1572	2.7536	2.9059	2.8081	3.0683	2.8608	2.8894	2.823	2.6178	2.6182	2.5653	2.9789	2.3062	2.874	2.914	2.6976	2.7244	2.7708	3.1549	2.7954	2.7401	2.8366	2.9179
5.1871	906.823	7.0577	6.3996	7.1097	5.8029	7.1489	5.1581	6.9019	6.647	6.5282	6.5935	7.1252	7.0714	7.4778	7.9537	6.8769	7.7794	7.3842	6.619	7.286	7.3588	7.1104	6.6012	7.2386	6.4094	7.1861	5.8794	7.0954	6.8058	6.7561	6.8232	6.9666	6.6769	6.371	6.3235	6.5187	6.7054
5.1872	974.811	5.7148	5.3859	6.0269	4.8493	5.9133	4.3105	5.7284	5.7143	5.4554	5.51	5.9117	5.8162	5.8493	6.559	5.4981	6.1613	6.0342	6.0737	5.9879	6.0478	5.7934	5.5215	6.0125	5.3337	5.8951	4.8266	5.8649	5.9515	5.6204	5.6762	5.5327	5.3745	5.2083	4.9492	5.2135	5.3629
5.1884	202.047	3.422	3.4187	3.6906	4.2259	3.1798	2.8637	2.8161	2.1939	3.2263	3.2586	11.0544	10.4986	7.0989	6.5514	11.2153	9.0846	9.7973	9.8697	9.3963	9.4902	5.3667	5.2235	4.5699	4.8612	5.2966	4.4799	4.6258	4.2636	4.8039	4.8516	2.5392	2.8109	3.1741	2.8095	2.8051	2.8855
5.1891	90.9756	4.9438	4.6834	4.1404	4.8821	5.1889	5.0596	3.6804	4.6851	4.658	4.7045	4.7206	4.9157	4.8964	5.2545	4.7605	5.2274	5.2808	5.114	5.0212	5.0714	4.9124	4.7655	4.3522	5.0259	5.1564	5.154	4.1262	4.9148	4.7757	4.8232	4.8739	4.6154	4.4185	5.143	4.7151	4.8502
5.1899	498.9	8.3704	6.2627	7.0456	8.7109	8.6161	8.6668	8.2315	7.506	7.9262	8.0055	8.3173	8.1985	8.4541	9.1836	8.327	8.7061	8.9068	8.8877	8.6226	8.7089	8.3993	6.7828	7.4368	8.9185	8.6709	8.7653	8.4878	8.0563	8.1464	8.2273	7.5115	6.6992	7.2579	6.9207	7.0264	7.2277
5.1915	770.848	6.9343	7.0488	7.0118	5.805	7.2484	5.16	6.8195	6.2171	6.5306	6.5959	7.171	7.2636	7.3571	8.3936	7.0437	7.65	7.5483	7.6934	7.5151	7.5902	7.0291	7.1383	7.1344	6.5231	7.3044	5.8478	7.075	6.7601	6.8158	6.8835	7.1422	6.2089	7.2486	6.6776	6.7511	6.9446
5.1926	294.938	2.9437	2.8376	3.0529	2.502	2.981	2.224	2.9768	2.9997	2.8147	2.8428	2.6691	2.993	2.9016	3.0212	2.6122	2.7632	2.9343	3.0242	2.8649	2.8935	2.8892	2.891	3.0301	2.6594	2.9307	2.3842	2.9963	3.0811	2.843	2.8713	2.8882	2.6598	2.9068	2.5572	2.7255	2.8036
5.1931	430.913	11.2724	10.2499	11.5613	9.5109	11.7309	8.4542	11.6753	11.1436	10.6998	10.8068	11.6249	11.7415	12.2746	13.398	12.2445	12.9177	12.9774	12.7721	12.4938	12.6188	11.4183	10.6778	11.7998	10.5973	12.0391	9.6791	12.1266	11.8497	11.2128	11.3242	11.2385	11.0352	11.1295	10.6059	10.8923	11.2044
5.1959	180.066	8.5243	8.8144	8.1372	9.2278	6.1284	6.4448	6.5167	5.2515	7.3806	7.4544	22.3555	25.2273	14.7955	14.9313	24.2423	20.9226	24.7107	24.1129	21.4123	21.6264	12.0601	13.0027	9.8597	10.7745	10.8847	10.2039	11.2245	10.3339	10.9686	11.0774	8.2641	8.3796	8.57	7.6525	8.1344	8.3675
5.1978	362.925	9.3086	9.101	8.8571	7.6712	9.4747	6.8189	9.4485	8.361	8.6301	8.7164	8.854	9.0696	9.6391	10.4541	9.1918	9.9549	10.1812	10.2424	9.6984	9.7954	9.2408	9.1386	9.0993	8.4576	9.544	7.6885	9.7318	9.0639	8.9482	9.0371	7.3748	8.8091	8.8434	7.1936	7.9747	8.2032
5.2272	992.34	0.2817	0.3321	0.2402	0.1939	0.2718	0.3376	0.2135	0.2909	0.2702	0.2729	0.4155	0.3725	0.2859	0.3589	0.3632	0.2582	0.2658	0.3699	0.3362	0.3396	0.3169	0.344	0.2529	0.2379	0.2994	0.3208	0.229	0.3189	0.2884	0.2913	0.3478	0.3205	0.2213	0.3058	0.2959	0.3043
5.2291	1094.32	0.2407	0.1641	0.1846	0.17	0.2029	0.2356	0.2444	0.2192	0.2077	0.2098	0.2647	0.3367	0.2488	0.2533	0.3024	0.2382	0.2869	0.3102	0.2802	0.283	0.248	0.2085	0.2018	0.1929	0.2316	0.2387	0.2577	0.2486	0.2272	0.2294	0.1957	0.1994	0.2011	0.185	0.1933	0.1989
5.2296	788.377	0.2656	0.2831	0.2571	0.2369	0.2781	0.2106	0.2454	0.3553	0.2665	0.2692	0.3492	0.348	0.2489	0.3489	0.3348	0.2506	0.3091	0.2819	0.3089	0.312	0.2881	0.3009	0.2563	0.2678	0.2969	0.2229	0.2642	0.3449	0.2787	0.2815	0.26	0.3322	0.2676	0.3028	0.2877	0.296
5.2299	890.357	0.3578	0.3089	0.3673	0.2915	0.3178	0.2591	0.3401	0.3811	0.328	0.3312	0.3194	0.3651	0.389	0.3928	0.3962	0.3156	0.4041	0.4822	0.3831	0.3869	0.3499	0.3246	0.3746	0.3203	0.3428	0.2762	0.3599	0.4172	0.3437	0.3471	0.3467	0.3528	0.3965	0.2885	0.3427	0.3525
5.2309	533.958	0.5749	0.5124	0.5583	0.3998	0.3822	0.3554	0.3741	0.4409	0.4497	0.4542	0.6066	0.628	0.4473	0.5418	0.6242	0.5547	0.4864	0.6464	0.5669	0.5726	0.5858	0.5442	0.5331	0.44	0.4502	0.4098	0.4066	0.5059	0.4819	0.4867	0.5588	0.5221	0.4022	0.4378	0.4754	0.489
5.2318	262.009	0.3428	0.3371	0.3858	0.2976	0.2645	0.3668	0.4149	0.2687	0.3348	0.3381	0.3741	0.4536	0.4099	0.3925	0.4733	0.2909	0.3515	0.3028	0.3811	0.3849	0.3524	0.3682	0.3938	0.3248	0.3222	0.3512	0.403	0.2844	0.3483	0.3518	0.3343	0.3019	0.4455	0.3888	0.3639	0.3744
5.2327	194.021	2.6973	1.6771	1.8868	1.6241	1.9337	2.3154	2.6269	2.2197	2.1226	2.1439	2.9292	3.1529	2.3861	2.6924	3.4934	2.2615	2.6828	3.0925	2.8364	2.8647	2.7695	2.0582	2.0224	1.9128	2.3643	2.3253	2.668	2.5043	2.3148	2.3378	2.0333	2.0487	2.1118	1.809	1.9807	2.0374
5.2347	150.058	0.5141	0.8229	0.5716	0.7671	0.6766	0.8453	0.6232	0.6566	0.6847	0.6915	0.7152	0.8273	0.6572	0.7014	0.7603	0.5637	0.6361	0.7805	0.7052	0.7123	0.5675	0.8281	0.5961	0.758	0.7083	0.7821	0.6329	0.7055	0.6937	0.7006	0.7713	0.7381	0.6469	0.7499	0.7193	0.7399
5.3806	129.053	0.3143	0.3361	0.31	0.3615	0.4544	0.3335	0.4789	0.3234	0.364	0.3677	0.3128	0.3512	0.4029	0.4129	0.3109	0.2873	0.372	0.3174	0.3459	0.3494	0.3155	0.3416	0.335	0.3782	0.4243	0.3251	0.4565	0.3299	0.3615	0.3651	0.3359	0.2669	0.3234	0.322	0.3089	0.3178
5.4112	118.087	1.2503	1.3143	1.3554	1.6941	1.4062	1.3152	1.3047	1.2235	1.358	1.3715	2.2765	1.8423	1.7333	1.6079	2.2068	1.5155	1.9145	2.2463	1.9179	1.9371	1.5158	1.4542	1.4577	1.6891	1.6334	1.3797	1.4736	1.5226	1.5071	1.522	2.0392	1.912	1.862	1.9434	1.9198	1.9748
5.4263	383.115	1.17	0.8239	0.9268	1.303	1.0005	1.214	0.9855	0.9179	1.0427	1.0531	0.7082	1.1156	1.0806	1.0464	1.2065	1.1687	1.1225	0.6345	1.0104	1.0205	1.0593	0.9016	0.9704	1.2506	1.0686	1.2148	1.0305	0.8665	1.0403	1.0507	1.2445	1.1913	1.2426	1.1261	1.1891	1.2232
5.4504	160.034	9.5763	10.1449	11.3816	12.0916	10.5192	11.6034	10.5416	9.4637	10.6653	10.7719	12.9636	12.1252	13.9643	11.5758	11.703	13.6305	11.8459	14.4296	12.7797	12.9075	10.48	10.6957	12.0913	12.081	10.9818	12.2389	10.9819	11.0038	11.2591	11.371	10.1421	10.5795	9.9813	10.0705	10.0914	10.3806
5.4555	365.066	2.9781	2.7413	3.6661	2.0215	3.6785	2.922	2.7751	2.9178	2.9625	2.9922	4.2051	3.892	3.4756	2.8743	3.7069	4.3717	3.6102	5.2126	3.9186	3.9577	3.303	3.0456	3.6365	2.2592	3.741	3.3216	3.0165	3.5931	3.2207	3.2527	2.0811	2.1552	2.0307	1.985	2.0424	2.1009
5.4621	375.018	0.9792	1.0832	1.2186	1.7772	1.2691	1.6877	1.6747	1.2775	1.3709	1.3846	1.6067	1.5294	1.3631	1.4506	1.5902	1.2198	1.4265	1.8818	1.5085	1.5236	1.1426	1.2013	1.2612	1.7117	1.3708	1.5856	1.6285	1.4681	1.4133	1.4273	1.481	1.3628	1.4963	1.4174	1.425	1.4658
5.4641	443.013	0.648	0.4738	0.5331	0.4563	0.6459	0.7451	0.6592	0.6361	0.5997	0.6057	0.72	0.6724	0.5126	0.6396	0.6395	0.6221	0.5666	0.6989	0.634	0.6403	0.6695	0.5263	0.5306	0.5076	0.6539	0.7213	0.6423	0.6685	0.6117	0.6178	0.6398	0.5446	0.5335	0.6534	0.5869	0.6037
5.468	520.949	0.2897	0.3556	0.2621	0.2584	0.2297	0.2921	0.3761	0.2618	0.2907	0.2936	0.4302	0.3041	0.4231	0.3642	0.265	0.2964	0.4069	0.3822	0.359	0.3626	0.3266	0.3444	0.3041	0.288	0.2422	0.2962	0.3878	0.3	0.3096	0.3126	0.344	0.2661	0.4045	0.3198	0.3303	0.3397
5.4688	512.065	0.3381	0.4697	0.3435	0.48	0.378	0.4908	0.3054	0.2862	0.3865	0.3903	0.3872	0.468	0.3959	0.4844	0.4105	0.3744	0.4456	0.3704	0.4171	0.4212	0.3522	0.4716	0.3585	0.4859	0.392	0.4661	0.3442	0.3155	0.3963	0.4003	0.4985	0.5026	0.4684	0.4315	0.4705	0.484
5.4695	237.972	1.5561	1.3608	1.5472	1.517	1.4677	1.4716	1.3896	1.6261	1.492	1.5069	1.6752	1.4221	1.9404	1.7156	1.51	1.4073	1.4599	1.2646	1.5494	1.5649	1.594	1.3831	1.6543	1.5828	1.5006	1.4702	1.4217	1.5719	1.5148	1.5299	1.3862	1.3903	1.4753	1.4264	1.4054	1.4456
5.4733	454.026	0.6155	0.9197	0.7424	1.087	0.7725	1.0009	0.6599	0.8837	0.8352	0.8436	0.8799	1.1289	0.8112	0.8832	1.0503	0.9532	0.8891	1.011	0.9509	0.9604	0.6854	0.9771	0.7635	1.0459	0.8556	0.9989	0.7251	0.9392	0.8691	0.8777	0.9582	1.0061	0.9899	0.8709	0.9467	0.9738
5.4742	531.965	0.5452	0.7361	0.5592	0.5935	0.8994	0.6755	0.4971	0.5267	0.6291	0.6354	0.7657	0.529	0.5832	0.6786	0.557	0.7571	0.5602	0.9154	0.6683	0.675	0.6036	0.6875	0.5681	0.6211	0.8247	0.7032	0.5182	0.6419	0.6425	0.6489	0.5409	0.7563	0.6468	0.6435	0.6404	0.6588
5.4846	463.978	1.6411	3.0428	2.2759	3.3156	3.0328	2.701	2.0231	2.4511	2.5604	2.586	3.4023	3.486	3.0898	2.9869	3.7452	3.4832	3.1089	4.0965	3.4249	3.4591	2.0941	3.1699	2.4929	3.2649	3.2617	2.9281	2.3207	2.9443	2.7932	2.8209	2.5304	2.9038	2.9375	2.3889	2.6632	2.7396
5.4914	275.138	1.805	2.3251	2.0644	1.5918	2.0292	1.8634	1.6983	2.1814	1.9448	1.9643	1.751	1.825	1.435	1.2619	1.5705	1.4671	1.7719	1.8434	1.6157	1.6319	1.8005	2.2105	1.9159	1.5236	1.9415	1.7813	1.7344	2.1472	1.8725	1.8911	1.4204	1.339	1.4361	1.5383	1.4191	1.4598
5.5034	226.043	2.3476	2.2783	2.7114	2.2864	1.68	1.7591	2.0574	1.89	2.1263	2.1475	3.1478	1.9541	3.4441	2.9839	2.2728	2.595	2.0839	2.457	2.6173	2.6435	2.5615	2.2078	2.9101	2.4871	1.8579	1.9903	2.0852	2.0861	2.2622	2.2847	1.8041	1.6233	1.7908	1.619	1.6922	1.7407
5.5052	126.021	17.2698	17.3546	11.8893	18.3468	14.1155	14.8457	13.4508	17.0727	15.5432	15.6986	20.5858	17.4715	15.622	13.4146	17.2159	13.0994	12.8085	18.4266	16.0805	16.2413	18.1944	17.4709	12.8919	17.2726	15.1256	14.5517	13.4242	17.8549	15.7654	15.9221	21.3106	20.8347	20.7898	19.8488	20.489	21.0761
5.5082	136.075	1.05	1.2358	1.0187	1.4998	1.0023	1.2679	0.9056	1.1886	1.1461	1.1575	2.1748	2.3229	1.9818	2.319	2.0717	1.6243	1.7381	2.4569	2.0862	2.107	1.3393	1.5165	1.2671	1.7237	1.2927	1.3718	1.1272	1.5512	1.3901	1.4039	1.5221	1.5989	1.501	1.6775	1.5591	1.6038
5.5084	123.044	0.1369	0.2143	0.1757	0.2184	0.2494	0.232	0.1561	0.1981	0.1976	0.1996	0.3645	0.4672	0.3556	0.3884	0.3283	0.3541	0.4307	0.3582	0.3809	0.3847	0.1951	0.2792	0.222	0.2639	0.2735	0.2655	0.2278	0.2451	0.245	0.2475	0.2787	0.2633	0.2882	0.2997	0.2797	0.2877
5.5106	165.054	3.3512	3.3965	4.0253	2.0675	3.1404	3.078	3.5616	2.8514	3.184	3.2158	5.8609	6.522	6.4755	6.0851	6.4315	4.6348	4.1445	5.3301	5.6856	5.7424	4.0019	4.2027	4.6644	3.1127	4.0349	3.5066	3.7466	3.5733	3.834	3.8721	4.5597	4.2476	4.0999	4.2348	4.2426	4.3642
5.5343	334.139	0.3366	0.381	0.3576	0.3655	0.2956	0.3432	0.2614	0.333	0.3342	0.3376	0.4627	0.523	0.4294	0.4401	0.5778	0.4338	0.3872	0.5093	0.4704	0.4751	0.3701	0.4188	0.3775	0.3882	0.3727	0.3698	0.2962	0.3876	0.3705	0.3742	0.334	0.3111	0.3301	0.3346	0.3242	0.3335
5.5572	383.115	1.497	1.8863	1.7377	1.6898	1.6288	1.7235	1.0922	1.9559	1.6514	1.6679	1.9186	1.6224	1.4402	1.3086	1.733	2.0418	1.7873	1.5786	1.6788	1.6956	1.611	1.8291	1.6714	1.6095	1.68	1.8223	1.2807	1.9058	1.6675	1.6841	1.6329	1.9097	1.8865	1.6044	1.7408	1.7907
5.5584	198.096	1.382	1.9822	1.89	1.2949	1.6549	1.6884	1.6885	1.8425	1.6779	1.6947	1.7304	1.4745	0.9554	1.0558	1.5354	1.6356	1.6364	1.5077	1.4414	1.4558	1.477	1.8639	1.6635	1.2469	1.649	1.6922	1.6924	1.8007	1.6275	1.6436	1.6115	1.5843	1.6678	1.5186	1.5796	1.6249
5.5607	180.085	0.7659	0.8982	0.9458	0.9976	0.9159	0.9153	0.8892	1.1014	0.9287	0.938	0.8831	0.6773	0.5981	0.5042	0.7871	0.9414	0.8512	0.6696	0.739	0.7464	0.7994	0.8469	0.8628	0.8818	0.8965	0.9313	0.8886	1.0156	0.8859	0.8947	0.7839	0.9048	0.911	0.7993	0.8413	0.8654
5.5617	235.057	0.3141	0.3619	0.3979	0.2724	0.3179	0.3466	0.2768	0.2511	0.3173	0.3205	0.2403	0.327	0.2474	0.3266	0.2887	0.257	0.2719	0.2414	0.275	0.2778	0.2971	0.3549	0.3619	0.2889	0.3151	0.3273	0.2784	0.2548	0.3084	0.3115	0.2491	0.319	0.2762	0.3073	0.285	0.2932
5.574	183.062	0.2829	0.3853	0.4059	0.2703	0.2324	0.2346	0.2663	0.2888	0.2958	0.2988	0.3785	0.4065	0.2165	0.2815	0.4164	0.3458	0.3045	0.351	0.3376	0.341	0.3085	0.3926	0.3601	0.2759	0.2833	0.2654	0.2788	0.3123	0.308	0.3111	0.3302	0.3179	0.3719	0.3103	0.3292	0.3387
5.5877	116.07	1.2709	1.0794	1.1311	1.8571	1.2287	1.2272	0.9733	1.1863	1.2443	1.2567	0.6674	0.7684	0.7252	0.5933	0.7153	0.6325	0.6901	0.666	0.6823	0.6891	1.1249	1.0063	1.0343	1.5534	1.1149	1.088	0.911	1.0794	1.1091	1.1201	1.0345	1.0245	0.7639	0.8071	0.8984	0.9242
5.5993	239.11	0.4949	0.6943	0.4059	0.6367	0.4217	0.5288	0.6131	0.4744	0.5337	0.5391	0.9008	1.2023	0.687	0.6065	0.8941	0.8415	0.9007	0.8878	0.8651	0.8737	0.5999	0.826	0.4789	0.6354	0.5497	0.614	0.6927	0.5948	0.6205	0.6266	0.6024	0.6495	0.5645	0.567	0.5899	0.6068
5.61	182.083	15.2891	19.1226	18.7182	20.6772	15.7232	19.2106	17.9878	18.0535	18.0978	18.2788	26.7669	29.9444	24.1052	26.2985	27.2068	18.6379	20.646	27.486	25.1365	25.3878	18.2648	21.9507	20.1731	22.3174	18.9161	19.2605	18.8495	20.9809	19.9777	20.1761	24.1087	23.9885	23.0228	22.6787	23.2152	23.8804
5.6216	155.067	0.2436	0.2619	0.2251	0.2629	0.2312	0.2438	0.3051	0.2526	0.2533	0.2558	0.2208	0.2825	0.2378	0.2489	0.3001	0.2466	0.2256	0.2252	0.2484	0.2509	0.2391	0.2684	0.2295	0.262	0.2524	0.247	0.2879	0.2517	0.2535	0.256	0.3246	0.3136	0.2727	0.3118	0.3026	0.3113
5.6447	212.102	1.0918	1.386	1.1	0.8551	0.7842	0.7529	1.088	0.8823	0.9925	1.0025	1.2252	1.5636	1.7738	1.6344	1.9542	1.597	0.9637	1.4305	1.5178	1.533	1.131	1.4378	1.2757	1.0624	1.0973	0.9759	1.0674	1.0482	1.1308	1.1421	1.2958	1.2143	1.1858	1.0733	1.1804	1.2142
5.6699	237.072	0.3766	0.3087	0.3643	0.2685	0.209	0.3714	0.3749	0.2565	0.3162	0.3194	0.2902	0.3764	0.2926	0.3762	0.3848	0.3529	0.2545	0.2847	0.3265	0.3298	0.3567	0.3273	0.348	0.2986	0.2574	0.3705	0.348	0.2703	0.3206	0.3238	0.3071	0.2978	0.2911	0.28	0.2911	0.2994
5.7779	438.179	0.3803	0.4617	0.3482	0.6	0.4353	0.3616	0.3918	0.547	0.4407	0.4451	0.5662	0.3759	0.7057	0.5878	0.4818	0.506	0.3994	0.397	0.5025	0.5075	0.4292	0.4423	0.4403	0.6029	0.4538	0.4021	0.3977	0.5213	0.4588	0.4634	0.3919	0.365	0.3392	0.3548	0.3591	0.3694
5.7834	285.127	3.8549	3.0213	3.4286	4.7642	3.6846	3.5976	3.7876	3.7471	3.7357	3.7731	4.3929	3.2473	4.5861	4.1659	3.9567	4.1598	2.9953	3.054	3.8198	3.8579	4.0102	3.0935	3.7382	4.6593	3.8099	3.7777	3.6241	3.6588	3.7777	3.8153	3.2566	3.9413	3.933	3.5063	3.6227	3.7265
5.7904	233.091	3.3288	1.5881	2.4043	2.6817	3.1417	2.594	3.0166	2.5184	2.6592	2.6858	6.5039	7.7879	7.988	7.4014	5.2891	7.2838	5.8229	6.6476	6.8406	6.909	4.1474	3.1615	3.8265	3.912	3.7418	3.8168	3.7633	3.6653	3.731	3.768	2.4067	2.6104	2.5761	2.685	2.5439	2.6167
5.918	118.061	6.5868	6.0006	4.0491	3.717	5.0481	5.4268	4.5553	5.6138	5.1247	5.1759	6.0433	6.0236	5.7637	4.8962	5.9901	6.8691	5.6737	5.6199	5.86	5.9185	6.4828	6.0364	4.5026	4.0549	5.3664	5.8501	4.8871	5.7557	5.339	5.3921	4.9074	4.8192	4.8568	4.5289	4.7303	4.8658
5.9305	83.0593	0.3764	0.4603	0.454	0.3943	0.5113	0.4571	0.4387	0.6156	0.4635	0.4681	0.4477	0.5267	0.4993	0.6046	0.698	0.4177	0.5802	0.623	0.5497	0.5551	0.3963	0.4794	0.4677	0.4519	0.567	0.4517	0.4793	0.6329	0.4878	0.4927	0.5222	0.5377	0.4332	0.5716	0.511	0.5257
5.9592	260.185	5.033	5.8313	4.8953	5.8808	4.2194	5.3065	7.5258	5.6781	5.5463	5.6017	1.8689	2.2942	2.1871	2.1404	1.5239	1.3683	1.6094	1.4984	1.8113	1.8294	4.2594	4.9673	4.2361	4.9858	3.5886	4.356	6.0933	4.7229	4.633	4.6791	4.9753	4.6649	4.9976	4.6203	4.7664	4.903
5.9961	251.099	0.3463	0.3205	0.3606	0.5197	0.459	0.3144	0.5026	0.4222	0.4057	0.4097	0.5505	0.5435	0.4415	0.6197	0.6479	0.5222	0.5922	0.5835	0.5626	0.5683	0.3996	0.3784	0.3828	0.5504	0.5145	0.3706	0.5306	0.4751	0.4476	0.452	0.4459	0.4323	0.4613	0.4101	0.433	0.4454
6.0195	254.099	0.5119	0.3573	0.5497	0.4579	0.6908	0.6769	0.6257	0.6764	0.5683	0.574	0.6329	0.6932	0.7752	0.7179	0.7476	0.6708	0.3878	0.5518	0.6472	0.6536	0.545	0.4439	0.6094	0.5288	0.7158	0.6823	0.5714	0.6606	0.5914	0.5973	0.5984	0.648	0.5548	0.5553	0.5832	0.5999
6.0443	233.113	0.5965	0.8953	0.9963	0.6988	0.6211	1.0515	0.7899	0.6394	0.7861	0.794	0.6446	0.7056	0.6809	0.6464	0.6793	0.5775	0.5657	0.5636	0.633	0.6393	0.6117	0.8519	0.9217	0.6924	0.6454	0.9413	0.7408	0.6355	0.7518	0.7592	0.5116	0.4499	0.4777	0.4474	0.4669	0.4803
6.102	90.056	4.423	6.3159	5.604	6.3603	5.446	6.7899	5.3169	6.0368	5.7866	5.8445	4.1996	5.3197	3.8852	3.8087	4.5026	3.7207	4.1784	4.5123	4.2659	4.3086	4.3889	6.0959	5.1983	5.7732	5.2848	6.0762	5.0807	5.7875	5.4344	5.4884	4.3612	4.7972	4.3252	4.3783	4.4208	4.5475
6.1218	162.078	0.9463	0.7917	0.8906	1.0875	0.881	1.1536	1.1382	1.1267	1.0019	1.012	1.2173	1.4572	0.9328	1.1263	1.6571	0.9956	1.2227	1.3426	1.244	1.2564	1.0195	0.9637	0.9058	1.1083	1.0941	1.1251	1.1714	1.2115	1.0687	1.0793	1.0755	1.1071	0.9911	1.0801	1.0528	1.083
6.1399	232.117	1.6689	1.2433	1.6434	1.4128	1.9142	1.7459	1.8056	1.5424	1.6221	1.6383	1.9949	1.7732	2.4537	2.4366	2.0152	1.8542	1.1484	1.6456	1.9152	1.9344	1.7597	1.3833	1.8563	1.688	1.9689	1.7913	1.6564	1.6081	1.7052	1.7221	1.7707	1.8306	1.7095	1.7737	1.7534	1.8037
6.1468	189.122	3.3944	2.2682	2.5517	3.0498	3.3723	2.5879	2.9164	2.8249	2.8707	2.8994	3.7849	3.8474	4.2374	3.9529	4.7464	4.0904	4.5501	4.3017	4.1889	4.2308	3.5102	2.6783	2.9903	3.3106	3.7767	2.9976	3.3629	3.2832	3.2199	3.2519	2.8043	2.9771	2.7552	2.6899	2.7786	2.8582
6.2665	161.091	0.2329	0.3012	0.3427	0.2433	0.3192	0.2163	0.2593	0.2747	0.2737	0.2764	0.3055	0.2804	0.3502	0.4351	0.3084	0.3315	0.3258	0.3484	0.3357	0.339	0.2524	0.2975	0.3463	0.2946	0.3212	0.2479	0.2789	0.3009	0.2909	0.2938	0.2264	0.2406	0.3184	0.3089	0.2708	0.2786
6.3105	120.065	33.6574	37.0067	25.3388	38.2033	34.5283	32.3284	21.0567	33.4267	31.9433	32.2627	29.4813	31.3713	30.3607	29.8305	35.8132	30.0469	35.0745	31.9662	31.7431	32.0605	32.7728	35.7688	26.7349	36.4503	35.3771	32.0763	24.8475	33.879	32.0703	32.3891	31.5584	31.3046	31.0844	32.708	31.3472	32.2454
6.3543	148.059	32.7656	40.5352	33.8986	35.0061	24.0314	33.7128	32.9655	37.2238	33.7674	34.105	34.5789	35.6553	22.1358	23.2771	30.2963	26.4655	26.0525	37.3838	29.4807	29.7755	33.389	39.5057	31.0994	32.3653	26.0051	32.208	31.5384	38.1964	32.8716	33.1983	30.6691	35.6217	31.0281	34.5458	32.6365	33.5717
6.3574	157.095	0.3169	0.3733	0.4373	0.3485	0.3097	0.4793	0.3414	0.5297	0.392	0.3959	0.526	0.4584	0.4438	0.4363	0.5224	0.4952	0.4395	0.4569	0.4723	0.477	0.3713	0.3967	0.4412	0.3743	0.3691	0.4882	0.3699	0.5238	0.4145	0.4186	0.3275	0.3424	0.3589	0.3056	0.3303	0.3397
6.3725	241.068	0.1894	0.1874	0.2212	0.2536	0.2687	0.1847	0.2539	0.1926	0.2189	0.2211	0.2516	0.2661	0.2407	0.2554	0.2534	0.307	0.3111	0.3561	0.2802	0.283	0.2061	0.2082	0.2272	0.2566	0.2688	0.2178	0.2711	0.2403	0.2356	0.238	0.261	0.2466	0.2194	0.258	0.2438	0.2508
6.3768	159.064	0.2099	0.2037	0.1692	0.1346	0.2095	0.1781	0.1905	0.1402	0.1795	0.1813	0.1841	0.2176	0.2213	0.1441	0.1838	0.1717	0.2024	0.2053	0.1913	0.1932	0.2044	0.2082	0.1832	0.1384	0.206	0.1783	0.1955	0.1608	0.1834	0.1853	0.2413	0.1984	0.167	0.2305	0.2072	0.2131
6.3894	76.0381	0.1924	0.1468	0.1325	0.0908	0.1328	0.1358	0.1361	0.1342	0.1377	0.1391	0.1065	0.116	0.0783	0.1193	0.138	0.1086	0.1138	0.1153	0.112	0.1131	0.1717	0.1398	0.1195	0.099	0.1361	0.1302	0.1318	0.1326	0.1319	0.1333	0.1275	0.1459	0.1178	0.1288	0.1287	0.1324
6.4211	247.107	1.4242	2.1476	1.6088	1.496	1.4067	1.561	1.3816	1.5539	1.5725	1.5882	2.0691	2.6971	2.371	2.4009	2.3398	2.0826	2.0811	2.626	2.3335	2.3568	1.5942	2.2971	1.8094	1.7417	1.6681	1.71	1.5741	1.8742	1.7736	1.7912	1.4429	1.6566	1.5598	1.6315	1.557	1.6016
6.4215	269.089	0.3511	0.5031	0.3328	0.4298	0.3899	0.4755	0.3677	0.3827	0.4041	0.4081	0.6114	0.745	0.7328	0.6993	0.5628	0.6158	0.6539	0.6436	0.6581	0.6647	0.4186	0.5667	0.4355	0.5028	0.4403	0.5161	0.4445	0.4608	0.4705	0.4752	0.3247	0.3827	0.4602	0.3713	0.3809	0.3918
6.5604	251.088	0.4752	0.6202	0.7536	0.3832	0.5101	0.5356	0.5688	0.6466	0.5617	0.5673	0.5079	0.4653	0.5164	0.5744	0.4651	0.463	0.3364	0.3694	0.4622	0.4669	0.4859	0.5842	0.6975	0.4358	0.5062	0.5225	0.5153	0.59	0.5397	0.545	0.5012	0.5139	0.5749	0.5184	0.5218	0.5368
6.5887	175.095	0.3162	0.3013	0.423	0.3107	0.3074	0.4016	0.313	0.3117	0.3356	0.339	0.342	0.2923	0.3694	0.399	0.337	0.3639	0.3017	0.363	0.346	0.3495	0.3243	0.3005	0.4116	0.3363	0.3196	0.3961	0.3133	0.333	0.3401	0.3435	0.4064	0.4018	0.4112	0.4358	0.4097	0.4214
6.5891	225.111	0.9495	1.1063	1.0117	0.8643	1.0469	1.0158	1.0141	0.886	0.9868	0.9967	1.3511	0.8799	0.8662	0.9583	1.0512	1.0929	1.0991	1.1086	1.0509	1.0614	1.0557	1.0547	0.9801	0.8969	1.0637	1.0458	1.0461	0.9666	1.0085	1.0185	0.9931	0.9113	0.9259	0.8657	0.9148	0.941
6.5893	197.077	1.3101	1.7737	2.0315	1.8044	1.4018	1.2668	1.8363	1.7827	1.6509	1.6674	1.6026	1.7122	1.7127	1.962	1.5584	1.7093	1.4525	1.5189	1.6536	1.6701	1.3906	1.767	1.9613	1.8626	1.4632	1.3926	1.7571	1.758	1.6608	1.6773	1.7778	1.7736	1.8242	2.099	1.85	1.903
6.5894	247.093	0.3897	0.3601	0.4115	0.4474	0.4447	0.4207	0.4747	0.5249	0.4342	0.4386	0.4678	0.5023	0.4116	0.4749	0.3981	0.5464	0.4803	0.4542	0.467	0.4716	0.4114	0.3978	0.4136	0.4589	0.4394	0.4571	0.481	0.5195	0.4449	0.4493	0.3186	0.3375	0.3645	0.4176	0.356	0.3662
6.5895	179.106	0.4913	0.5308	0.5119	0.5264	0.5135	0.5434	0.6286	0.4563	0.5253	0.5305	0.5981	0.453	0.4097	0.5248	0.4864	0.4152	0.4668	0.4726	0.4783	0.4831	0.5208	0.5138	0.4887	0.5313	0.5142	0.5162	0.5937	0.472	0.5163	0.5215	0.4743	0.4668	0.4099	0.4189	0.4381	0.4506
6.593	171.101	0.6069	0.8628	1.0231	0.6688	0.671	0.7733	0.776	0.7745	0.7696	0.7772	0.686	0.814	0.8087	0.9667	0.7693	0.9705	0.8236	0.7483	0.8234	0.8316	0.6299	0.8548	0.9741	0.7515	0.7064	0.8315	0.7961	0.787	0.7874	0.7953	0.9821	0.9468	0.8742	0.8879	0.9135	0.9397
6.6008	147.972	102.68	99.6004	75.3854	97.9079	98.5094	107.768	88.5756	99.5239	99.6821	97.4423	67.6161	72.907	77.1079	68.8804	74.6318	73.4696	78.4625	77.3967	72.6063	73.8615	94.3444	93.3583	76.2011	91.485	93.8386	100.118	86.8995	96.2036	93.3922	92.0181	119.387	115.609	112.283	107.212	112.487	115.71
6.6628	191.101	0.6427	0.5666	0.6141	0.5408	0.6806	0.4807	0.7147	0.6267	0.6084	0.6144	0.814	0.7737	0.8492	0.8554	0.7555	0.8009	0.8314	0.8894	0.8212	0.8294	0.6892	0.6217	0.6766	0.6264	0.7101	0.5673	0.7518	0.7113	0.6655	0.6721	0.6626	0.6177	0.6493	0.6954	0.6497	0.6683
6.6867	213.109	0.6052	0.5993	0.6445	0.7018	0.5943	0.6982	0.6492	0.6355	0.641	0.6474	0.7953	0.5622	0.6346	0.6336	0.781	0.7125	0.9642	0.8829	0.7458	0.7532	0.6563	0.5929	0.6453	0.6914	0.6513	0.709	0.7362	0.7163	0.6711	0.6777	0.9673	0.6787	0.7084	0.6392	0.7409	0.7621
6.6884	95.0844	0.2568	0.2844	0.2092	0.2815	0.2625	0.214	0.242	0.2551	0.2507	0.2532	0.1231	0.1414	0.1264	0.1699	0.1541	0.1588	0.1537	0.2228	0.1563	0.1578	0.2243	0.2497	0.1893	0.2559	0.2385	0.2021	0.2219	0.253	0.2282	0.2305	0.3303	0.3118	0.3186	0.3249	0.3182	0.3273
6.691	173.116	0.3049	0.348	0.3046	0.336	0.2984	0.3462	0.3809	0.3591	0.3348	0.3381	0.392	0.3617	0.3088	0.3143	0.3643	0.2931	0.4035	0.4429	0.3601	0.3637	0.3284	0.3532	0.3072	0.3338	0.3198	0.3362	0.3906	0.3901	0.343	0.3464	0.3491	0.3711	0.3067	0.2997	0.3283	0.3377
6.6916	293.144	0.5981	0.5129	0.5477	0.4639	0.5775	0.4123	0.5753	0.4872	0.5219	0.5271	0.5548	0.6155	0.6478	0.4776	0.5047	0.5105	0.6172	0.5914	0.5649	0.5706	0.5902	0.5414	0.5757	0.472	0.5674	0.4416	0.5919	0.5267	0.5357	0.541	0.5841	0.5826	0.4833	0.5242	0.5381	0.5535
6.6935	101.07	1.4554	1.4802	1.3467	1.5611	1.9193	1.7816	1.1971	1.379	1.515	1.5302	1.3165	1.5299	1.6545	1.4748	1.6341	1.5246	1.5797	1.5278	1.5302	1.5455	1.4277	1.5002	1.4312	1.5547	1.8747	1.7342	1.3069	1.4525	1.5273	1.5425	1.2987	1.4353	1.2976	1.2644	1.3108	1.3483
6.6936	193.082	0.3815	0.338	0.4403	0.3408	0.2849	0.37	0.3605	0.3239	0.355	0.3585	0.3654	0.3599	0.3495	0.3392	0.3432	0.4621	0.4363	0.4839	0.3924	0.3964	0.3794	0.3452	0.4196	0.3438	0.3042	0.3973	0.3835	0.374	0.3664	0.3701	0.3848	0.3766	0.3549	0.3642	0.3664	0.3769
6.6944	141.087	0.5513	0.5726	0.5898	0.668	0.598	0.6858	0.6355	0.6333	0.6168	0.623	0.7701	0.5986	0.5311	0.6706	0.6991	0.8649	0.6499	0.7514	0.692	0.6989	0.6093	0.582	0.578	0.6753	0.633	0.7385	0.6457	0.6801	0.6392	0.6456	0.7682	0.6788	0.6477	0.6568	0.681	0.7005
6.6951	84.0433	3.389	2.7263	3.2175	1.8733	3.5462	2.9205	2.9668	3.0488	2.961	2.9907	3.1801	3.4345	3.6708	3.4344	3.6682	3.7773	3.7421	3.3165	3.528	3.5633	3.3534	2.9188	3.3482	2.2901	3.6308	3.1689	3.1949	3.1953	3.1208	3.1518	3.0165	3.0677	3.0275	2.928	2.9798	3.0652
6.7068	436.159	3.47	5.9289	3.6663	4.2966	4.3394	3.9594	5.5752	4.3139	4.4437	4.4881	3.3338	1.9346	2.0988	2.5749	2.3679	2.0593	2.2881	3.0138	2.4589	2.4835	3.4531	4.95	3.289	3.9005	3.8968	3.5151	4.7935	4.0805	3.9667	4.0062	3.5101	3.6031	3.6929	3.534	3.5492	3.6509
6.727	173.091	1.6258	1.3055	1.8471	1.2739	1.1323	1.2949	1.7164	1.2688	1.4331	1.4474	2.4218	2.2782	2.3924	2.1021	1.8868	2.3729	2.3061	2.1746	2.2419	2.2643	1.835	1.5576	1.9941	1.4978	1.3436	1.5831	1.8843	1.5383	1.6455	1.6618	1.7025	1.6543	1.5831	1.6297	1.626	1.6726
6.7507	219.033	0.1612	0.1283	0.1542	0.1875	0.1942	0.1583	0.1755	0.1552	0.1643	0.1659	0.2021	0.1776	0.1721	0.1983	0.2406	0.1897	0.1924	0.1923	0.1956	0.1976	0.1723	0.1414	0.1595	0.1921	0.2091	0.1679	0.1816	0.1688	0.1731	0.1749	0.2175	0.1723	0.2228	0.1691	0.1935	0.199
6.7548	60.0431	0.3775	0.3301	0.3098	0.1983	0.3001	0.3049	0.3426	0.2711	0.3043	0.3073	0.2586	0.3571	0.2748	0.2615	0.3378	0.3266	0.2313	0.2329	0.2851	0.2879	0.3494	0.3386	0.3025	0.2164	0.3143	0.3135	0.3177	0.2679	0.3011	0.3041	0.2158	0.2965	0.2094	0.2497	0.2404	0.2473
6.7919	106.051	10.9571	10.3889	11.3816	8.6152	9.9703	9.1427	10.2999	10.0003	10.0945	10.1954	8.2819	9.4406	8.1606	7.3151	9.6174	9.7876	8.6364	7.9033	8.6429	8.7293	10.3369	10.2014	10.6257	8.3698	10.029	9.4005	9.9806	9.6998	9.7837	9.8809	12.8897	13.0772	12.2814	12.1088	12.4634	12.8205
6.7969	183.098	0.4693	0.4658	0.4514	0.6135	0.4928	0.4971	0.5578	0.4136	0.4952	0.5001	0.7227	0.5745	0.5145	0.5633	0.622	0.7734	0.7292	0.7547	0.6568	0.6634	0.5357	0.4956	0.4696	0.6068	0.5335	0.5727	0.6072	0.5135	0.5388	0.5441	0.6914	0.7442	0.7442	0.7458	0.7241	0.7448
6.7986	125.095	0.4622	0.377	0.4016	0.516	0.4571	0.4181	0.374	0.3424	0.4186	0.4227	0.4369	0.3058	0.4202	0.413	0.4151	0.4449	0.5648	0.4806	0.4352	0.4395	0.4581	0.3609	0.4083	0.4949	0.4531	0.4292	0.4265	0.3872	0.4251	0.4293	0.5019	0.5464	0.5185	0.6461	0.5477	0.5634
6.8008	106.052	10.9571	10.3889	11.3816	8.6152	9.9703	9.1427	10.2999	10.0003	10.0945	10.1954	8.2819	9.4406	8.1606	7.3151	9.6174	9.7876	8.6364	7.9033	8.6429	8.7293	10.3369	10.2014	10.6257	8.3698	10.029	9.4005	9.9806	9.6998	9.7837	9.8809	12.8897	13.0772	12.2814	12.1088	12.4634	12.8205
6.8183	205.081	2.8295	2.5157	2.5097	2.1389	1.9013	2.1797	3.0263	2.1491	2.4063	2.4303	3.2998	4.1202	3.5979	3.2612	4.8569	3.7278	2.8252	3.0214	3.5888	3.6247	2.9626	2.9334	2.7972	2.4465	2.6908	2.5969	3.0059	2.4318	2.7186	2.7456	2.6572	2.579	2.4608	2.4183	2.5035	2.5753
6.8461	150.074	0.4637	0.4459	0.4492	0.3967	0.5341	0.3527	0.4313	0.497	0.4463	0.4508	0.3743	0.4769	0.4826	0.4215	0.4645	0.5283	0.5823	0.4167	0.4684	0.4731	0.4435	0.456	0.4599	0.407	0.5242	0.4011	0.4742	0.4883	0.4544	0.4589	0.4137	0.4187	0.4196	0.3885	0.406	0.4177
6.8508	133.061	12.0197	15.2058	12.9032	14.4521	13.4573	14.2851	13.249	13.6704	13.6553	13.7919	14.9585	17.4691	13.939	13.7632	18.1809	14.5801	16.0683	14.7272	15.4608	15.6154	12.8225	15.8533	13.2299	14.421	14.8755	14.5061	14.1034	14.2896	14.1877	14.3286	14.2811	14.5307	15.1894	14.9717	14.5958	15.014
6.8535	155.042	0.8052	1.0077	1.1822	0.8111	1.1243	1.1415	0.9125	1.228	1.0266	1.0368	1.2441	0.9323	1.0942	0.9477	1.0148	0.9706	0.9349	1.3095	1.056	1.0666	0.9201	0.9937	1.1659	0.8541	1.113	1.1096	0.9275	1.2801	1.0397	1.05	0.6995	0.7356	0.8489	0.7221	0.744	0.7653
6.8559	87.0541	0.8194	0.9521	0.755	0.95	0.8868	0.9161	0.6711	0.8447	0.8494	0.8579	0.9407	1.2377	0.8068	0.9706	1.2715	1.0158	1.1615	1.0379	1.0553	1.0659	0.8542	1.029	0.7719	0.9648	0.9992	0.9509	0.8031	0.9165	0.9062	0.9152	0.991	0.9835	0.9646	1.0645	0.9909	1.0193
6.8627	487.277	0.1558	0.1523	0.1479	0.143	0.1649	0.134	0.1514	0.1781	0.1534	0.155	0.1842	0.169	0.1373	0.1259	0.1932	0.1591	0.1856	0.1345	0.1611	0.1627	0.1638	0.1573	0.146	0.1401	0.1747	0.1418	0.1617	0.1711	0.1562	0.1578	0.1448	0.1696	0.1269	0.1655	0.1502	0.1545
6.8658	114.054	1.3762	1.4798	1.3566	1.18	1.381	0.8323	1.1772	1.2231	1.2508	1.2633	0.8909	0.895	0.6976	0.8059	1.1005	1.0332	1.2809	1.1655	0.9837	0.9935	1.2606	1.3395	1.197	1.0964	1.3295	0.892	1.2157	1.2386	1.1902	1.202	1.2074	1.1458	1.2159	1.2616	1.1956	1.2299
6.8658	134.047	0.8381	0.7745	0.7278	0.8564	1.0042	0.673	0.4035	0.7394	0.816	0.7786	0.3215	0.347	0.376	0.342	0.3548	0.4588	0.3342	0.2401	0.373	0.354	0.7119	0.6705	0.6426	0.7338	0.8521	0.6252	0.39	0.6268	0.7085	0.6756	0.6233	0.6874	0.5562	0.5954	0.6094	0.6269
6.8668	209.125	6.6337	7.0757	6.4714	5.5956	6.7056	5.0483	6.3681	5.6588	6.1947	6.2566	6.5112	5.8628	4.2385	3.6878	6.7553	6.5409	7.0748	7.2206	5.9865	6.0464	6.6363	6.8048	5.9402	5.1651	6.819	5.4806	6.6134	6.2102	6.1765	6.2379	6.1401	5.7212	6.336	6.1991	6.0381	6.2111
6.8979	249.107	0.7819	0.9982	0.8471	1.2697	0.9726	0.8508	0.753	1.1509	0.953	0.9626	1.1681	1.3149	1.2065	1.2585	1.8954	1.1434	1.7142	1.3845	1.3857	1.3995	0.8834	1.0832	0.9422	1.2795	1.2248	0.9341	1.0059	1.241	1.0677	1.0783	1.1107	1.0013	1.0882	0.9686	1.0318	1.0613
6.9129	157.085	0.4058	0.4297	0.4686	0.7263	0.5117	0.5574	0.549	0.4535	0.5128	0.5179	0.5581	0.506	0.4353	0.616	0.5945	0.5291	0.8197	0.5395	0.5748	0.5805	0.4463	0.4511	0.4626	0.7054	0.5407	0.5559	0.6237	0.4874	0.5313	0.5366	0.5656	0.5398	0.6101	0.509	0.5506	0.5663
6.9211	556.276	0.258	0.261	0.3061	0.2836	0.2915	0.2884	0.2993	0.2639	0.2815	0.2843	0.3691	0.3159	0.2984	0.2444	0.2621	0.3231	0.2665	0.3	0.2974	0.3004	0.2874	0.2762	0.3057	0.2764	0.2883	0.3002	0.294	0.28	0.2871	0.2899	0.2301	0.2419	0.2632	0.1923	0.2296	0.2361
6.9523	197.102	0.4365	0.4381	0.3775	0.5078	0.6352	0.5368	0.5628	0.6987	0.5242	0.5294	0.9213	0.59	0.7783	0.6814	0.716	0.5762	0.8437	0.9213	0.7535	0.7611	0.5611	0.4786	0.4806	0.5571	0.6655	0.5523	0.6402	0.7746	0.5851	0.5909	0.5461	0.5891	0.5162	0.5312	0.5402	0.5557
7.0622	155.105	0.3463	0.4119	0.3726	0.4296	0.3335	0.4096	0.4335	0.3793	0.3895	0.3934	0.3241	0.3137	0.3365	0.3654	0.2752	0.4392	0.402	0.39	0.3558	0.3593	0.3424	0.3892	0.3654	0.4175	0.3235	0.4213	0.4299	0.3916	0.3832	0.387	0.4097	0.4338	0.4297	0.3617	0.4046	0.4162
7.1089	141.083	1.0573	1.0225	1.1927	1.0445	1.2704	1.3809	1.2928	1.5149	1.222	1.2342	1.1637	1.0543	1.0626	1.2269	1.0525	1.1468	1.2621	1.0096	1.1223	1.1335	1.0895	1.0356	1.1659	1.1015	1.2333	1.3353	1.2982	1.4201	1.2036	1.2156	1.3815	1.4279	1.322	1.317	1.3485	1.3871
7.1169	181.083	0.7205	0.6322	0.7021	0.6547	0.7678	0.9294	0.8415	1.0262	0.7843	0.7921	0.8786	0.795	0.8797	1.0461	0.8034	1.0114	0.9831	0.7777	0.8969	0.9058	0.7641	0.6765	0.7505	0.7611	0.7885	0.9598	0.8862	0.9866	0.8171	0.8252	0.9541	0.8927	0.8468	0.978	0.9087	0.9348
7.2225	262.236	1.3801	1.3927	1.1943	1.2346	1.9902	1.2819	1.1888	1.0935	1.3445	1.358	1.7261	1.9856	1.5354	1.1413	1.9061	1.454	1.6647	1.6279	1.6301	1.6464	1.4744	1.5494	1.2865	1.2232	1.9984	1.3389	1.3223	1.2611	1.4242	1.4383	1.7145	1.6874	1.4671	1.6678	1.6179	1.6642
7.2379	187.132	1.1891	1.5145	1.2728	1.5478	1.9607	2.0126	1.6674	1.9846	1.6437	1.6601	2.0503	1.6815	1.9889	2.3949	2.0734	2.2906	2.6361	2.4147	2.1913	2.2132	1.4126	1.5642	1.4601	1.7793	2.0191	2.1041	1.9315	2.1471	1.7913	1.809	1.4334	1.4797	1.3783	1.5691	1.4505	1.492
7.2404	109.1	3.1476	3.3409	3.3597	4.4083	4.3051	3.3501	3.8694	4.0081	3.7237	3.7609	3.7069	3.192	3.3306	3.5621	3.6537	3.7844	4.1831	3.3974	3.6013	3.6373	3.3047	3.32	3.3693	4.2366	4.2019	3.4951	3.9889	3.948	3.7134	3.7503	3.8277	4.0752	3.6946	4.0207	3.8655	3.9763
7.251	173.118	0.4456	0.5196	0.5145	0.6233	0.6637	0.5116	0.5956	0.581	0.5569	0.5624	0.7195	0.6324	0.6036	0.6837	0.6524	0.7023	0.809	0.71	0.6891	0.696	0.517	0.5507	0.5396	0.6449	0.6707	0.5655	0.6561	0.6294	0.5934	0.5993	0.6667	0.6149	0.5802	0.6135	0.6126	0.6302
7.2911	305.144	1.0862	1.3411	1.3926	1.0758	0.9563	1.1685	1.3422	1.3197	1.2103	1.2224	2.0494	2.2688	2.1862	2.2838	3.077	2.7735	1.9794	2.0266	2.3306	2.3539	1.3349	1.582	1.6	1.3946	1.5167	1.5899	1.5184	1.5383	1.5002	1.5151	1.6672	1.4548	1.6343	1.5867	1.5699	1.6149
7.2963	298.1	1.2548	1.196	0.9593	0.9916	0.8925	1.4064	0.8527	1.0802	1.0792	1.09	1.1989	1.3152	1.2028	1.1603	1.6937	1.221	1.5073	1.403	1.3378	1.3512	1.247	1.2321	1.0256	1.0445	1.1122	1.3735	1.0284	1.1919	1.1506	1.162	1.03	1.007	0.9566	0.947	0.9753	1.0032
7.3021	481.398	0.2518	0.1952	0.2803	0.243	0.2112	0.1685	0.2275	0.2343	0.2265	0.2287	0.2155	0.1527	0.226	0.1718	0.2943	0.2648	0.1977	0.2167	0.2174	0.2196	0.2439	0.1854	0.268	0.2273	0.2358	0.1948	0.2222	0.2355	0.2254	0.2277	0.1886	0.1911	0.2021	0.1402	0.1787	0.1838
7.3062	185.114	0.5255	0.5199	0.5574	0.4992	0.4384	0.4311	0.4828	0.4911	0.4932	0.4981	0.5302	0.5282	0.4853	0.5246	0.5492	0.6248	0.5684	0.5846	0.5494	0.5549	0.5293	0.5246	0.542	0.5107	0.4735	0.4849	0.5096	0.5279	0.5101	0.5152	1.5117	1.3682	1.514	1.4092	1.4363	1.4774
7.3091	163.131	0.3311	0.3165	0.3539	0.3629	0.3401	0.2657	0.3017	0.3462	0.3273	0.3305	0.3606	0.2964	0.2729	0.2608	0.406	0.3865	0.2996	0.3124	0.3244	0.3276	0.3402	0.313	0.3352	0.3405	0.3622	0.2992	0.3042	0.346	0.3284	0.3316	1.1717	1.0674	1.0712	0.9778	1.0613	1.0917
7.3199	225.111	1.0212	0.9298	1.423	0.788	0.8923	0.774	0.9011	0.9463	0.9595	0.9691	0.6081	0.7067	0.8058	0.8383	0.8938	0.8617	0.6725	0.6022	0.7486	0.7561	0.922	0.8781	1.2743	0.8087	0.9061	0.8043	0.852	0.8796	0.9115	0.9206	0.7946	0.8415	1.046	0.9855	0.9077	0.9337
7.3214	237.111	0.4206	0.4669	0.5153	0.6191	0.5367	0.5304	0.5191	0.4877	0.512	0.5171	0.7011	0.6739	0.63	0.5762	0.7448	0.8	0.7573	0.7403	0.703	0.71	0.4936	0.5215	0.5469	0.6144	0.5983	0.6046	0.5852	0.5662	0.5631	0.5687	0.5492	0.5832	0.5296	0.5299	0.5425	0.558
7.3261	152.016	0.3683	0.4734	0.3778	0.343	0.4501	0.361	0.3387	0.4624	0.3968	0.4008	0.3618	0.3941	0.2405	0.2751	0.4291	0.4752	0.3648	0.4486	0.3736	0.3774	0.3685	0.4557	0.345	0.3291	0.4514	0.3938	0.3488	0.4703	0.3932	0.3971	0.4231	0.4833	0.5075	0.4326	0.457	0.4701
7.3277	306.263	0.2205	0.2309	0.2553	0.2227	0.3089	0.1875	0.1974	0.2341	0.2322	0.2345	0.3101	0.2545	0.3092	0.244	0.342	0.2543	0.3197	0.2567	0.2863	0.2892	0.2442	0.238	0.2702	0.2304	0.3221	0.2065	0.2306	0.2459	0.2471	0.2496	0.2643	0.2538	0.2521	0.231	0.2478	0.2549
7.387	223.129	0.2346	0.3379	0.2469	0.2133	0.2683	0.285	0.283	0.2695	0.2673	0.27	0.4099	0.3304	0.2493	0.4061	0.3303	0.3426	0.3986	0.3641	0.3539	0.3575	0.2801	0.3377	0.2488	0.2646	0.2883	0.3026	0.3154	0.3011	0.2907	0.2936	0.4498	0.4045	0.4128	0.3181	0.3923	0.4036
7.402	112.089	0.1451	0.2076	0.1859	0.1556	0.1381	0.2151	0.1331	0.1642	0.1681	0.1698	1.5381	2.253	1.3829	1.3846	1.9964	1.4239	1.6657	1.9791	1.703	1.72	0.4976	0.7251	0.4891	0.4706	0.6187	0.5257	0.5254	0.6447	0.557	0.5625	2.5581	2.2914	2.5099	2.9963	2.563	2.6365
7.4427	270.1	0.2671	0.2733	0.3653	0.2395	0.2129	0.3276	0.1892	0.2804	0.2694	0.2721	0.4381	0.411	0.6258	0.6058	0.6441	0.4486	0.4339	0.4205	0.5035	0.5085	0.3116	0.3094	0.4329	0.3353	0.3271	0.3618	0.2536	0.3242	0.3301	0.3333	0.2598	0.3768	0.3133	0.3478	0.3212	0.3304
7.4614	189.11	0.5778	0.7392	0.8421	0.4695	0.5198	0.4863	0.5338	0.6637	0.604	0.6101	0.6113	0.6539	0.847	0.8051	0.8928	0.9252	0.6819	0.7157	0.7666	0.7743	0.5892	0.7214	0.8476	0.5598	0.6236	0.6032	0.577	0.6939	0.6485	0.6549	0.7375	0.8025	0.7452	0.6645	0.7301	0.751
7.4617	185.116	1.8002	2.0784	2.2175	2.0629	1.6836	1.4083	1.6429	1.5308	1.8031	1.8211	1.7236	2.0523	2.7051	2.5609	2.357	2.5223	1.9364	1.8581	2.2145	2.2366	1.7899	2.0822	2.3518	2.2105	1.8823	1.7069	1.7345	1.655	1.9171	1.9361	2.101	1.9805	1.7553	1.9837	1.9356	1.991
7.4751	161.127	2.4583	2.8694	3.2193	1.436	2.4924	2.6277	2.5216	2.5916	2.527	2.5523	3.7128	3.6703	3.9742	3.6724	4.7393	4.0382	4.0904	3.3317	3.9037	3.9427	2.7875	3.086	3.4262	2.0206	3.1084	3.0143	2.9475	2.8507	2.8891	2.9178	2.5212	2.5888	2.8814	3.0114	2.7232	2.8012
7.5122	265.069	0.1669	0.1896	0.185	0.1734	0.1482	0.1886	0.2652	0.2281	0.1931	0.1951	0.5717	0.8565	0.9903	1.1397	1.1734	1.1081	0.972	1.0897	0.9877	0.9976	0.27	0.3589	0.3893	0.4215	0.4144	0.4251	0.4482	0.46	0.395	0.399	0.2556	0.2289	0.2334	0.21	0.2297	0.2362
7.5145	243.09	0.4582	0.4637	0.4379	0.5984	0.5111	0.6235	0.6986	0.6813	0.5591	0.5647	1.788	2.5248	2.6514	3.3365	3.547	2.6957	2.5997	2.5997	2.7179	2.745	0.7963	0.9864	0.9991	1.3026	1.3005	1.1585	1.1907	1.2019	1.1079	1.1189	0.6704	0.7666	0.6407	0.5941	0.6613	0.6802
7.5692	227.124	3.2312	2.6895	2.9972	4.3927	3.2399	3.1481	3.5888	3.56	3.3559	3.3895	3.5732	3.1164	3.3038	3.2942	3.3746	4.1764	3.598	3.2153	3.4565	3.4911	3.3339	2.8107	3.0898	4.1565	3.3232	3.4425	3.6278	3.5585	3.4	3.4338	3.7498	3.6774	3.9592	3.4364	3.6686	3.7738
7.5695	109.1	0.5494	0.4494	0.4868	0.632	0.5998	0.4948	0.496	0.473	0.5227	0.5279	0.4122	0.2835	0.4074	0.2945	0.308	0.4412	0.3729	0.3391	0.3574	0.3609	0.5175	0.4098	0.4692	0.5523	0.5337	0.4862	0.4697	0.4497	0.4838	0.4886	0.7894	0.7215	0.5921	0.6328	0.6771	0.6965
7.5697	172.131	0.7017	0.6426	0.6097	0.5861	0.7002	0.5997	0.6244	0.7945	0.6574	0.6639	0.6699	0.4622	0.5559	0.5428	0.601	0.6751	0.6533	0.4984	0.5823	0.5881	0.6972	0.6003	0.5992	0.5809	0.6852	0.6251	0.6381	0.7366	0.6421	0.6484	0.7048	0.7319	0.7049	0.6621	0.6939	0.7138
7.5717	187.132	1.3268	1.1427	1.2206	1.7458	1.4188	1.304	1.4784	1.5341	1.3964	1.4104	1.6713	1.3195	1.3464	1.295	1.5097	1.8219	1.6897	1.4065	1.5075	1.5226	1.4205	1.1931	1.2585	1.6483	1.4635	1.4494	1.5474	1.539	1.4322	1.4465	1.376	1.4511	1.3512	1.3562	1.3698	1.409
7.5733	367.082	0.2652	0.2523	0.2334	0.2186	0.3045	0.2604	0.2005	0.2936	0.2536	0.2561	0.5194	0.3887	0.5852	0.4575	0.3339	0.382	0.382	0.4371	0.4357	0.4401	0.3307	0.288	0.3234	0.2817	0.3166	0.2941	0.2488	0.3386	0.301	0.304	0.25	0.2215	0.2352	0.2365	0.2334	0.2401
7.5758	345.099	0.2885	0.3333	0.2684	0.3234	0.3241	0.3087	0.2902	0.3254	0.3078	0.3108	0.6625	0.518	0.7076	0.6131	0.4303	0.5454	0.4317	0.5802	0.5611	0.5667	0.3844	0.3816	0.3807	0.4005	0.3563	0.3722	0.3293	0.4004	0.3735	0.3772	0.2536	0.2276	0.2557	0.2533	0.2451	0.2521
7.578	209.114	0.2843	0.2475	0.2642	0.3549	0.2353	0.2552	0.271	0.241	0.2692	0.2719	0.2727	0.2813	0.2334	0.2653	0.2398	0.3567	0.2725	0.3082	0.2787	0.2815	0.2828	0.2573	0.2578	0.3356	0.24	0.2837	0.2741	0.2647	0.2731	0.2758	0.2611	0.2318	0.2416	0.2748	0.2498	0.257
7.5824	241.129	0.6052	0.5057	0.5013	0.7739	0.4805	0.5318	0.5406	0.6657	0.5756	0.5813	1.3538	0.8438	0.8645	1.0646	0.8696	0.9921	0.8326	1.2393	1.0075	1.0176	0.7973	0.5936	0.5955	0.8558	0.5879	0.6547	0.6206	0.8329	0.688	0.6948	1.6155	1.5715	1.5067	1.5915	1.5556	1.6002
7.5855	310.2	2.9545	3.0282	2.2526	3.5479	3.7718	2.2148	3.1392	2.6057	2.9393	2.9687	1.4155	1.3272	1.856	1.5963	1.7909	1.6742	1.3574	1.6382	1.582	1.5978	2.5808	2.6138	2.1638	3.0857	3.3183	2.0995	2.7167	2.4169	2.6126	2.6386	2.9293	2.807	3.0441	2.8607	2.8812	2.9637
7.5864	217.046	0.5851	0.6711	0.659	0.6649	0.6868	0.5324	0.5802	0.718	0.6372	0.6436	0.7124	0.7351	0.5943	0.7242	0.6999	0.8839	0.8056	0.7724	0.741	0.7484	0.6202	0.6906	0.646	0.6867	0.7005	0.6275	0.6436	0.7502	0.667	0.6736	0.893	0.8042	0.8345	0.8604	0.8395	0.8636
7.5881	137.095	0.3147	0.3325	0.2143	0.4831	0.3397	0.3084	0.3537	0.3937	0.3425	0.3459	0.2949	0.2691	0.3611	0.3464	0.3064	0.4264	0.3395	0.348	0.3365	0.3398	0.3113	0.3182	0.2525	0.4531	0.3362	0.3416	0.3537	0.3915	0.3429	0.3463	0.4114	0.372	0.4304	0.3708	0.3922	0.4034
7.5904	442.171	0.4869	0.488	0.4096	0.6762	0.5446	0.6858	0.4607	0.3949	0.5183	0.5235	0.802	0.6256	0.6431	0.5917	0.8836	0.7246	0.6204	0.6502	0.6927	0.6996	0.5689	0.5252	0.4706	0.6614	0.6401	0.7027	0.5062	0.4718	0.5653	0.5709	0.4358	0.4638	0.4495	0.4241	0.4389	0.4514
7.5968	719.274	0.5814	0.5947	0.4748	0.5874	0.6078	0.6956	0.5341	0.7311	0.6009	0.6069	0.5886	0.4633	0.5587	0.4645	0.4817	0.6092	0.7028	0.4709	0.5425	0.5479	0.5862	0.5645	0.4983	0.5619	0.5844	0.6807	0.5826	0.6811	0.5894	0.5953	0.4519	0.4199	0.391	0.3642	0.4027	0.4142
7.5993	447.197	4.1421	4.2901	3.8016	4.3701	3.1293	4.0846	3.5204	4.3456	3.9605	4.0001	4.3795	3.9628	4.1963	3.7244	3.8417	4.3367	4.0175	4.0975	4.0696	4.1102	4.223	4.2289	3.9205	4.2491	3.3597	4.1906	3.6831	4.3891	4.0101	4.0499	3.0003	2.9649	3.006	3.0701	2.9802	3.0656
7.6011	170.094	46.8613	46.1553	35.3587	31.9079	43.3697	38.8066	36.8292	37.6427	39.6164	40.0126	51.5941	58.7506	58.2751	64.737	66.4597	55.0918	56.7358	52.0342	57.9598	58.5394	48.2931	49.5664	41.3242	40.5984	49.9659	43.357	42.2832	42.3615	44.4736	44.9153	44.0038	41.4156	43.1988	33.4308	40.1071	41.2564
7.603	795.418	0.7987	0.7374	0.5381	0.4677	0.7292	0.8415	0.6054	0.7303	0.681	0.6878	0.9816	1.1875	0.9285	0.8477	1.3832	1.0957	0.9566	0.9243	1.0381	1.0485	0.8489	0.8547	0.6394	0.5693	0.9085	0.9149	0.7011	0.7995	0.7751	0.7828	0.6443	0.7702	0.7533	0.6551	0.6987	0.7187
7.6046	371.212	0.5177	0.6311	0.5449	0.4525	0.4022	0.465	0.5697	0.4893	0.5091	0.5141	0.6065	0.7821	0.74	0.6936	0.8393	0.7453	0.7736	0.7399	0.74	0.7474	0.5427	0.6724	0.5969	0.5185	0.5208	0.5413	0.6275	0.5673	0.5703	0.5759	0.454	0.476	0.5152	0.4355	0.4655	0.4788
7.6071	158.091	0.5118	0.464	0.522	0.6133	0.6441	0.6543	0.6913	0.5975	0.5873	0.5932	0.9188	1.0905	0.9749	1.043	0.999	1.0476	1.0767	0.9078	1.0073	1.0174	0.6172	0.6245	0.639	0.729	0.7451	0.7613	0.7967	0.6939	0.6967	0.7036	0.695	0.5654	0.5482	0.5294	0.5787	0.5952
7.6321	175.12	90.0174	128.928	119.68	118.691	111.597	121.251	117.623	112.332	115.015	116.165	121.429	146.375	124.297	121.087	152.942	136.344	133.883	127.116	132.934	134.264	98.4043	133.978	121.45	120.489	123.917	126.339	122.971	119.021	120.184	121.378	110.136	98.0829	96.0983	116.453	104.141	107.125
7.6597	191.138	1.0428	0.764	0.8595	1.1298	1.154	0.975	0.9924	0.8183	0.967	0.9767	1.1788	1.3386	1.1744	1.3564	1.7302	1.1833	1.4625	1.2292	1.3317	1.345	1.0824	0.9129	0.9434	1.1989	1.3197	1.0381	1.1225	0.9466	1.0645	1.0751	1.2861	1.1459	1.1554	1.1402	1.1701	1.2036
7.6761	156.076	45.489	46.9913	47.281	53.3477	53.8586	50.0518	47.9342	45.944	48.8622	49.3508	51.8702	59.8035	49.6416	44.4197	72.0872	47.3129	55.3805	53.864	54.2975	54.8404	47.3302	50.4613	48.1159	51.6045	59.3603	49.8638	50.3229	49.1716	50.5079	51.0097	48.7763	49.442	48.8856	50.9712	49.0236	50.4283
7.685	110.07	2.6476	2.9458	3.6224	2.4897	2.213	3.1848	2.616	2.6877	2.8009	2.8289	3.2854	4.2926	4.0786	3.5348	5.1113	3.9522	3.3114	3.5527	3.8899	3.9288	2.822	3.3006	3.7559	2.7811	2.9925	3.4131	2.8201	2.982	3.0917	3.1224	3.2969	3.2205	3.1233	3.0988	3.153	3.2434
7.697	84.0797	0.8546	0.6803	0.6037	0.6003	0.8897	0.6722	0.5366	0.596	0.6792	0.686	0.9495	0.9286	0.9083	0.9572	1.2597	0.8553	0.9583	0.9694	0.9733	0.983	0.8829	0.7464	0.6837	0.6973	0.9983	0.7258	0.6497	0.7089	0.7573	0.7648	0.5981	0.6011	0.6717	0.7032	0.6371	0.6553
7.7137	169.094	0.5587	0.5378	0.6434	0.4483	0.5377	0.6685	0.5044	0.6406	0.5674	0.5731	0.7306	0.6513	0.7443	0.6466	0.7783	0.7466	0.651	0.7556	0.713	0.7202	0.6049	0.5691	0.6721	0.5034	0.6077	0.6952	0.5469	0.6868	0.6074	0.6134	0.5321	0.5884	0.5217	0.5294	0.5375	0.5529
7.7178	147.112	41.1522	45.533	43.1677	47.4248	51.7399	45.3394	44.8819	42.0656	45.1631	45.6147	43.4274	46.5771	38.7606	45.6605	57.5955	39.3801	45.3029	45.037	45.2176	45.6698	41.9346	46.0243	42.2728	47.4492	54.0238	44.2818	45.4473	43.8972	45.428	45.8795	37.8323	36.6529	33.187	32.2661	34.6347	35.6271
7.7448	171.1	2.9129	3.1694	2.8489	3.8374	3.3271	2.9976	3.3783	3.3434	3.2269	3.2591	3.4145	2.77	2.9386	3.0165	2.3552	3.2291	3.2799	3.0354	3.0049	3.0349	3.0543	3.0844	2.8859	3.6664	3.1267	3.0872	3.3877	3.3461	3.1887	3.2204	3.4778	3.4445	3.2329	3.382	3.3505	3.4465
7.7456	203.126	1.2078	1.3527	1.1138	1.4301	1.4289	1.4489	1.406	1.3905	1.3473	1.3608	1.5755	1.3092	1.2715	1.3408	1.1445	1.3677	1.637	1.4101	1.382	1.3959	1.3068	1.3485	1.1592	1.4216	1.3771	1.443	1.4793	1.4304	1.3636	1.3772	1.3719	1.3723	1.2959	1.2811	1.317	1.3547
7.747	189.111	1.0194	1.1265	1.0285	0.9799	1.087	1.2293	1.107	1.3143	1.1115	1.1226	1.1836	0.9386	0.9556	1.0085	1.0232	1.2363	1.3362	1.1109	1.0991	1.1101	1.066	1.0847	1.0153	0.997	1.0869	1.2436	1.1768	1.2938	1.1145	1.1256	1.5024	1.2158	1.2525	1.2432	1.2904	1.3274
7.7489	183.065	0.8683	1.2011	0.9373	0.894	1.3086	0.7794	0.7484	0.8838	0.9526	0.9621	0.9661	0.7286	0.7261	0.9591	0.7879	0.8084	0.9302	0.8204	0.8409	0.8493	0.8974	1.0878	0.8887	0.9195	1.1941	0.7948	0.8024	0.8893	0.9297	0.9389	1.0003	0.971	0.8921	1.0552	0.9699	0.9976
7.7929	116.07	2.1799	2.77	2.7763	2.1696	1.9286	2.4979	2.4917	2.7128	2.4409	2.4653	4.7469	3.7684	3.3328	2.998	3.9955	3.2032	3.0605	2.3708	3.4345	3.4689	2.8391	3.0359	2.9309	2.4026	2.4897	2.7033	2.6622	2.6908	2.7056	2.7325	1.9723	2.045	2.0251	1.8449	1.9521	2.008
7.7988	186.148	0.9946	1.6028	1.2883	1.1698	1.2426	1.0634	1.3098	1.7074	1.2973	1.3103	1.0651	1.0255	0.6524	0.9984	1.1478	1.1185	1.2834	1.1746	1.0582	1.0688	1.0174	1.465	1.1342	1.1378	1.2368	1.0883	1.3164	1.6102	1.2441	1.2565	1.2569	1.1873	1.264	1.1885	1.2119	1.2467
7.8511	313.115	0.3453	0.3427	0.3276	0.3495	0.3147	0.4037	0.2919	0.2219	0.3247	0.3279	0.1791	0.2374	0.2113	0.2017	0.2048	0.258	0.2216	0.2199	0.2167	0.2189	0.3051	0.3178	0.2999	0.3153	0.2911	0.3707	0.2769	0.2269	0.2992	0.3022	0.3325	0.2391	0.2267	0.3026	0.2725	0.2803
7.8581	204.131	0.3993	0.4885	0.4318	0.373	0.3316	0.4292	0.4383	0.4655	0.4196	0.4238	0.5616	0.6943	0.6657	0.534	0.7892	0.7339	0.7841	0.638	0.6751	0.6819	0.4423	0.5429	0.493	0.4178	0.4544	0.5113	0.531	0.5224	0.4866	0.4914	0.514	0.5546	0.5012	0.5172	0.5165	0.5313
7.8645	209.113	0.6347	0.8654	0.7188	0.8184	0.623	0.6624	0.7274	0.8548	0.7381	0.7455	0.684	0.7251	0.7253	0.7725	1.0212	0.8225	0.9481	0.832	0.8163	0.8245	0.6504	0.8343	0.7241	0.8149	0.7349	0.71	0.7911	0.8702	0.762	0.7696	0.7418	0.7607	0.7898	0.8124	0.7684	0.7904
7.87	327.015	0.1887	0.2204	0.1631	0.1723	0.1571	0.2001	0.1218	0.2442	0.1835	0.1853	0.1878	0.3405	0.3118	0.2742	0.2336	0.2928	0.2307	0.1903	0.2577	0.2603	0.1894	0.2518	0.2015	0.2	0.1792	0.2258	0.1508	0.2362	0.2032	0.2053	0.1639	0.1809	0.1191	0.1395	0.1493	0.1536
7.9065	299.134	0.2517	0.2748	0.1857	0.1879	0.2114	0.2154	0.1651	0.1793	0.2089	0.211	0.4126	0.4683	0.3413	0.3706	0.5272	0.44	0.432	0.4164	0.4261	0.4303	0.2936	0.325	0.2259	0.2364	0.2959	0.2749	0.2348	0.246	0.265	0.2676	0.3794	0.3474	0.3346	0.4215	0.367	0.3775
7.9172	193.083	0.971	0.9679	0.9374	1.1258	1.0692	1.1059	1.1016	1.012	1.0364	1.0467	1.0927	0.8879	0.9695	1.0992	1.1663	1.081	1.2809	0.9009	1.0598	1.0704	1.0066	0.9525	0.9502	1.1303	1.1102	1.1108	1.1586	1.0081	1.048	1.0585	1.0929	1.0611	1.1313	1.1238	1.0913	1.1225
7.9194	153.09	0.3534	0.4451	0.3562	0.5247	0.358	0.3101	0.3601	0.3881	0.387	0.3908	0.3622	0.3595	0.3862	0.3936	0.4133	0.3874	0.5494	0.3508	0.4003	0.4043	0.3574	0.4257	0.3656	0.4965	0.3776	0.333	0.4121	0.388	0.3925	0.3964	0.4869	0.4751	0.3832	0.3926	0.4301	0.4424
7.9247	219.131	0.5679	0.7202	0.5694	0.7388	0.4675	0.5491	0.5945	0.5259	0.5917	0.5976	1.1249	0.915	0.7607	0.6744	0.7659	0.7416	1.0073	0.7402	0.8413	0.8497	0.7114	0.773	0.6206	0.7298	0.5513	0.6038	0.7059	0.5953	0.658	0.6646	0.5815	0.5065	0.5624	0.641	0.5671	0.5834
7.9566	285.118	0.223	0.2664	0.2099	0.2027	0.1802	0.2352	0.3039	0.2028	0.228	0.2303	0.3184	0.4726	0.4339	0.4692	0.5723	0.3715	0.3268	0.3388	0.4129	0.4171	0.2482	0.3198	0.2675	0.2727	0.2838	0.2724	0.3128	0.2436	0.276	0.2788	0.387	0.3998	0.3621	0.3555	0.3723	0.383
7.9591	125.095	0.6875	0.6298	0.5692	0.8235	0.555	0.7348	0.6984	0.5889	0.6609	0.6675	0.5892	0.4933	0.4499	0.5657	0.5126	0.53	0.5122	0.4899	0.5179	0.523	0.6661	0.5985	0.5419	0.766	0.5524	0.6901	0.658	0.5776	0.6284	0.6347	1.0121	0.9425	0.8357	0.865	0.9047	0.9306
7.9604	143.106	0.5165	0.546	0.489	0.5326	0.4643	0.5988	0.6396	0.4595	0.5308	0.5361	0.553	0.447	0.4377	0.5324	0.4487	0.4992	0.4959	0.6002	0.5018	0.5068	0.5283	0.5237	0.4785	0.5379	0.4672	0.5795	0.6095	0.5079	0.5264	0.5316	0.7678	0.6868	0.7664	0.8127	0.7508	0.7724
8.0135	163.107	0.4319	0.3904	0.4931	0.3385	0.3138	0.3009	0.3424	0.4353	0.3808	0.3846	0.4716	0.6156	0.4116	0.6004	0.7167	0.4691	0.5841	0.5173	0.5483	0.5538	0.4441	0.4492	0.475	0.4086	0.4223	0.3469	0.4076	0.4677	0.4252	0.4295	0.5843	0.7836	0.5628	0.5751	0.6202	0.638
8.0158	264.226	0.3976	0.4148	0.4675	0.3614	0.3589	0.4433	0.4363	0.5057	0.4232	0.4274	0.5149	0.3837	0.4278	0.3973	0.4366	0.3779	0.4541	0.4729	0.4332	0.4375	0.4292	0.409	0.4598	0.3742	0.3843	0.4311	0.4453	0.5097	0.4281	0.4323	0.4475	0.5358	0.4199	0.4292	0.4535	0.4665
8.0263	237.109	0.4314	0.506	0.4794	0.4467	0.4285	0.5703	0.6048	0.4981	0.4957	0.5006	0.5255	0.5869	0.479	0.5898	0.5795	0.5632	0.5612	0.6198	0.5631	0.5687	0.4573	0.529	0.4817	0.4877	0.4738	0.5743	0.5998	0.5425	0.5155	0.5206	0.3891	0.3664	0.4377	0.3724	0.3875	0.3986
8.0814	276.154	1.3543	1.4723	1.7198	1.3629	1.6273	1.2115	1.7343	1.7838	1.5333	1.5486	2.2722	2.3986	2.6594	3.1168	3.9407	2.613	2.9324	2.4895	2.8028	2.8309	1.5929	1.7136	1.9658	1.8238	2.2474	1.5814	2.0576	2.0136	1.8627	1.8812	2.0432	2.0064	2.0912	2.0415	2.0251	2.0831
8.0861	137.095	0.5038	0.499	0.4138	0.5034	0.5171	0.4723	0.5507	0.5203	0.4976	0.5025	0.4738	0.3497	0.4588	0.3731	0.3788	0.4415	0.4514	0.4982	0.4282	0.4324	0.4988	0.4638	0.4273	0.4752	0.4892	0.4693	0.531	0.5275	0.4828	0.4876	0.5508	0.4481	0.5864	0.4384	0.5009	0.5152
8.0866	95.0845	0.3047	0.2116	0.2264	0.3045	0.2163	0.258	0.2556	0.2269	0.2505	0.253	0.2346	0.2279	0.1955	0.2062	0.193	0.1972	0.2375	0.2744	0.2208	0.223	0.2885	0.2168	0.2197	0.2825	0.2135	0.2451	0.2536	0.245	0.2444	0.2468	0.2059	0.2246	0.2706	0.2228	0.2287	0.2352
8.0868	155.106	3.7446	3.8026	3.5345	3.2469	3.882	3.9624	3.844	4.4952	3.814	3.8522	3.5241	3.7027	3.2408	3.5279	3.3378	3.8201	3.9202	3.5593	3.5791	3.6149	3.7078	3.7964	3.4782	3.351	3.8001	3.9665	3.9027	4.3619	3.7759	3.8134	4.692	4.1712	4.3245	3.9249	4.2354	4.3567
8.0873	173.116	0.4251	0.4383	0.4491	0.3923	0.4399	0.4042	0.5457	0.5568	0.4564	0.461	0.3702	0.4429	0.4251	0.3626	0.432	0.561	0.5525	0.4302	0.4471	0.4515	0.4134	0.4417	0.4453	0.3886	0.4445	0.4483	0.553	0.5375	0.4566	0.4611	0.5484	0.4818	0.5656	0.498	0.5182	0.5331
8.1236	237.108	0.6109	0.553	0.6069	0.7727	0.6055	0.6694	0.5795	0.5228	0.6151	0.6212	0.6681	0.7199	0.6362	0.813	0.6619	0.876	0.8529	0.7643	0.749	0.7565	0.6284	0.5979	0.6174	0.7907	0.6291	0.7289	0.6552	0.5993	0.6524	0.6588	1.1361	1.1766	1.2381	1.2674	1.1925	1.2267
8.1781	199.132	0.2922	0.2601	0.3816	0.3591	0.2973	0.2957	0.3215	0.3403	0.3185	0.3217	0.2643	0.3831	0.3757	0.3927	0.3829	0.4586	0.2189	0.3078	0.348	0.3515	0.2866	0.2925	0.382	0.3713	0.3238	0.3403	0.2986	0.3403	0.3277	0.331	0.3302	0.339	0.2773	0.3674	0.3252	0.3345
8.1956	227.126	1.1998	0.9185	1.3158	1.5775	1.2658	1.7332	1.2781	1.208	1.3121	1.3252	0.8473	0.6865	0.8692	0.781	0.8835	0.7297	0.7711	0.9038	0.809	0.8171	1.1168	0.8645	1.2097	1.3902	1.1863	1.4949	1.1618	1.1583	1.1922	1.2041	1.2913	1.2525	1.201	1.202	1.2243	1.2594
8.196	249.109	2.3054	1.8582	2.2898	2.8162	2.5067	3.3338	2.4706	2.4158	2.4996	2.5246	1.5715	1.4862	1.8003	1.6015	1.7125	1.4412	1.4361	1.4407	1.5613	1.5769	2.1317	1.7736	2.1778	2.5346	2.3398	2.885	2.2319	2.2202	2.2763	2.2989	2.4772	2.4462	2.2005	2.2311	2.3154	2.3817
8.1982	183.1	1.6617	1.4484	1.7808	1.9249	1.8911	2.3672	1.9352	2.0799	1.8862	1.905	0.9325	0.7839	0.8332	1.0378	1.0645	0.9578	0.8877	0.9063	0.9255	0.9347	1.486	1.2879	1.5505	1.7179	1.7066	2.0318	1.6877	1.8238	1.6538	1.6702	1.6174	1.4158	1.5796	1.5853	1.534	1.578
8.2119	352.118	2.5139	2.1779	2.5811	3.173	2.8127	4.1058	2.9421	3.1139	2.9276	2.9568	1.8314	1.5716	2.3412	2.3727	2.2184	2.1377	1.5905	1.6328	1.962	1.9817	2.3542	2.0357	2.5336	3.0007	2.7019	3.6456	2.6273	2.803	2.6998	2.7266	2.4764	2.4871	2.746	2.6498	2.5639	2.6374
8.2128	330.136	2.3352	2.1806	2.2266	2.8636	2.5049	3.5837	2.7126	2.8385	2.6557	2.6823	1.3526	1.2883	1.7707	2.0205	1.901	2.054	1.3489	1.4016	1.6422	1.6586	2.0989	1.9662	2.1227	2.6772	2.387	3.23	2.3924	2.5323	2.4143	2.4383	2.621	2.5912	2.4908	2.6259	2.5564	2.6297
8.3191	211.131	0.4823	0.3396	0.4563	0.437	0.3559	0.2656	0.2925	0.4273	0.3821	0.3859	0.5464	0.6252	0.6894	0.6468	0.4768	0.4552	0.3896	0.4162	0.5307	0.536	0.5009	0.4134	0.5175	0.4949	0.3924	0.3167	0.3203	0.4351	0.4218	0.426	0.5115	0.516	0.4791	0.422	0.4773	0.491
8.323	233.114	0.2505	0.2078	0.2942	0.216	0.2061	0.208	0.205	0.2846	0.234	0.2364	0.4488	0.3579	0.4291	0.514	0.3303	0.3708	0.2295	0.4206	0.3876	0.3915	0.3018	0.2467	0.3298	0.2942	0.2412	0.2517	0.2133	0.3274	0.2742	0.2769	0.3024	0.2699	0.2499	0.2545	0.2665	0.2741
8.3315	181.121	6.0916	5.8937	5.691	5.7899	6.4308	6.0991	5.6395	6.4068	6.0053	6.0654	6.1439	5.4537	5.5073	5.0731	5.8554	5.7654	6.3895	6.1453	5.7917	5.8496	6.1356	5.8121	5.6734	5.665	6.3791	6.0762	5.8884	6.4983	5.9847	6.0442	16.4812	16.7537	16.2254	15.7183	16.1317	16.5939
8.332	481.255	0.2491	0.1932	0.2218	0.2661	0.206	0.2029	0.2983	0.2251	0.2328	0.2351	0.2241	0.2376	0.2203	0.2156	0.2309	0.2097	0.3284	0.2637	0.2413	0.2437	0.244	0.2054	0.2225	0.2559	0.2155	0.2067	0.309	0.2409	0.2362	0.2386	0.4688	0.4084	0.4088	0.4412	0.4275	0.4397
8.3323	383.217	0.1959	0.1934	0.1966	0.1824	0.2699	0.287	0.2427	0.2681	0.2295	0.2318	0.2986	0.3026	0.2328	0.2367	0.2194	0.3606	0.3147	0.2935	0.2824	0.2852	0.2228	0.2219	0.2067	0.1981	0.2609	0.3087	0.2635	0.2815	0.2441	0.2466	1.2992	1.1817	1.2883	1.2428	1.2405	1.276
8.3347	203.103	1.7271	1.7194	1.7095	1.9149	2.0947	2.1028	2.0248	2.0699	1.9204	1.9396	2.1589	1.9562	1.9092	2.1662	1.9381	2.2463	2.3416	2.2093	2.1157	2.1369	1.8449	1.7878	1.7686	1.9981	2.0858	2.1609	2.1263	2.1582	1.9804	2.0001	4.6385	4.6114	4.6147	4.5401	4.5552	4.6857
8.3597	236.072	0.1732	0.1612	0.1854	0.1996	0.1913	0.1467	0.1874	0.2063	0.1814	0.1832	0.2973	0.2321	0.22	0.268	0.2473	0.3427	0.2479	0.2434	0.2623	0.265	0.2054	0.1799	0.1951	0.219	0.2086	0.1982	0.2047	0.2212	0.2029	0.2049	0.2446	0.2256	0.1963	0.2411	0.2246	0.2311
8.3851	314.231	2.2095	2.1889	2.0551	2.1036	1.9289	2.8098	3.3077	2.5701	2.3967	2.4207	1.0363	0.7682	1.0652	1.0965	0.7183	0.7028	0.7514	0.7581	0.8621	0.8707	1.9244	1.8411	1.8155	1.8678	1.6461	2.301	2.6893	2.1587	2.0221	2.0422	2.5186	2.3657	2.5181	2.3085	2.4034	2.4723
8.3996	246.242	4.8471	4.094	4.3631	5.6987	5.7502	4.2122	4.6284	4.5179	4.764	4.8116	5.9945	5.4757	5.2862	4.2027	6.8877	5.856	5.5378	5.9465	5.6484	5.7049	5.1613	4.4633	4.6182	5.3742	6.1294	4.6745	4.9076	5.0059	5.014	5.0638	6.7403	6.4196	6.647	6.487	6.5077	6.6942
8.4365	244.226	0.5827	0.5125	0.5728	0.5816	0.5994	0.5685	0.5589	0.6151	0.5739	0.5797	0.6638	0.6975	0.6678	0.584	0.6915	0.787	0.6956	0.7319	0.6899	0.6968	0.6061	0.5618	0.5997	0.588	0.6321	0.63	0.5995	0.6611	0.6064	0.6125	0.786	0.6796	0.6931	0.7293	0.7148	0.7353
8.4407	171.1	0.2365	0.2305	0.2442	0.2198	0.2441	0.2338	0.2378	0.205	0.2315	0.2338	0.2387	0.2196	0.2142	0.2031	0.2613	0.2258	0.2561	0.2092	0.2285	0.2308	0.2383	0.2289	0.2379	0.2177	0.2522	0.2341	0.2449	0.2112	0.232	0.2343	0.237	0.1824	0.2276	0.2836	0.2303	0.2369
8.442	125.095	0.613	0.5932	0.6579	0.6936	0.7586	0.7432	0.6776	0.5497	0.6609	0.6675	0.3941	0.3475	0.3295	0.3632	0.419	0.4651	0.5523	0.4491	0.415	0.4191	0.5608	0.5341	0.5783	0.6163	0.6825	0.6798	0.6526	0.537	0.6024	0.6084	0.8665	0.6655	0.6981	0.6586	0.715	0.7354
8.4434	503.258	0.2829	0.2466	0.2533	0.3125	0.2946	0.2919	0.3202	0.2803	0.2853	0.2881	0.4442	0.3333	0.2832	0.3262	0.3248	0.2985	0.3486	0.4158	0.3468	0.3503	0.3251	0.2697	0.2621	0.3191	0.3068	0.2966	0.3307	0.3229	0.3024	0.3054	0.3329	0.2669	0.2554	0.3098	0.2883	0.2966
8.4435	290.266	2.385	2.1112	2.0603	2.1136	2.1107	2.2289	2.0278	1.7642	2.1002	2.1212	2.3785	2.5019	1.7433	1.6254	2.5771	2.4833	2.511	2.702	2.3153	2.3385	2.3954	2.2204	1.9907	2.0102	2.2625	2.3165	2.1718	2.0545	2.1663	2.1878	2.786	2.4553	2.4516	2.2395	2.4583	2.5287
8.4437	153.09	0.5966	0.6492	0.5328	0.6291	0.6879	0.5541	0.5614	0.5627	0.5967	0.6027	0.3899	0.3861	0.3178	0.3565	0.4197	0.3627	0.5339	0.4736	0.405	0.4091	0.5474	0.586	0.4812	0.5659	0.6292	0.5109	0.5601	0.5534	0.5516	0.5571	0.6426	0.639	0.7381	0.5848	0.6446	0.6631
8.4441	241.082	0.3886	0.4583	0.3609	0.5121	0.516	0.4699	0.4751	0.5363	0.4647	0.4693	0.8122	0.7623	0.6083	0.7654	0.8722	0.9081	1.0201	1.016	0.8456	0.854	0.4975	0.5374	0.4252	0.5818	0.6155	0.5865	0.619	0.6756	0.5635	0.5691	1.0032	1.0601	1.192	0.9837	1.0492	1.0792
8.4453	203.127	3.3895	3.8404	3.4727	3.5593	4.1789	4.2147	3.8819	4.507	3.8806	3.9194	4.3759	3.5531	3.3293	3.5525	4.6255	4.3123	5.0308	4.3537	4.1416	4.1831	3.6557	3.7871	3.454	3.5932	4.3566	4.2826	4.2146	4.5794	3.9681	4.0076	4.9341	4.297	4.7945	4.2105	4.5134	4.6428
8.4461	225.109	14.6525	15.4771	15.0076	17.929	17.2751	16.2969	17.5151	16.3413	16.3118	16.4749	18.4373	16.2336	14.508	16.1003	18.6251	18.703	21.6905	19.0038	17.9127	18.0918	15.6823	15.7455	14.9572	17.642	17.8819	17.077	18.759	17.4487	16.8072	16.9742	18.5697	16.9983	18.6763	16.9964	17.6321	18.1373
8.4483	217.142	5.3379	5.7402	5.4716	6.7421	6.4938	5.8762	6.3714	6.1825	6.027	6.0872	6.3649	5.9144	5.25	5.2533	6.9707	6.2501	7.6103	6.5971	6.2764	6.3391	5.6242	5.8129	5.4433	6.4299	6.714	6.0315	6.7525	6.4459	6.1235	6.1844	6.9999	5.952	7.022	6.0394	6.4383	6.6228
8.4507	185.116	12.7724	13.3071	12.4268	15.2871	15.0782	12.6958	14.053	13.7876	13.676	13.8128	14.3531	12.487	10.7795	11.7952	15.0872	14.1842	16.6649	14.5179	13.7336	13.871	13.2361	13.1666	12.0736	14.5495	15.3067	13.205	14.8627	14.324	13.7666	13.9034	16.0957	13.5241	15.3521	13.965	14.5869	15.0049
8.4976	334.294	0.4873	0.4757	0.4312	0.4294	0.4213	0.464	0.4163	0.3491	0.4343	0.4386	0.4679	0.5351	0.4613	0.423	0.5483	0.5761	0.4738	0.5835	0.5086	0.5137	0.4849	0.4931	0.441	0.4321	0.4603	0.4973	0.4352	0.4194	0.4555	0.46	0.4729	0.4623	0.4263	0.4362	0.4449	0.4577
8.5103	173.116	0.1995	0.2327	0.2196	0.2283	0.2305	0.2393	0.2756	0.2641	0.2362	0.2386	0.3284	0.2318	0.2322	0.337	0.3148	0.3178	0.3741	0.3078	0.3055	0.3085	0.2331	0.2336	0.2239	0.2583	0.2557	0.2618	0.3035	0.2822	0.255	0.2576	0.3224	0.2128	0.2859	0.2844	0.2736	0.2815
8.5157	293.135	0.5499	0.4543	0.587	0.4584	0.5621	0.5357	0.4407	0.5374	0.5157	0.5208	0.3922	0.7436	0.6439	0.7918	0.5724	0.5166	0.6434	0.5663	0.6088	0.6149	0.5129	0.5296	0.6043	0.548	0.5732	0.5363	0.4969	0.5584	0.5421	0.5475	0.4914	0.4826	0.4463	0.4577	0.4648	0.4781
8.5159	271.153	0.4828	0.421	0.5371	0.5348	0.376	0.5547	0.3224	0.3094	0.4423	0.4467	0.2925	0.4314	0.5751	0.4351	0.4219	0.4065	0.4254	0.3514	0.4174	0.4216	0.4372	0.4257	0.5494	0.5147	0.3935	0.5226	0.352	0.3282	0.4384	0.4428	0.3748	0.4077	0.3162	0.4312	0.3787	0.3895
8.5221	202.215	1.8016	1.7137	1.6102	1.884	1.5905	1.6276	1.7168	1.6119	1.6945	1.7115	1.864	1.872	1.6794	1.7981	1.8743	1.9867	1.6998	1.9031	1.8347	1.853	1.8265	1.7622	1.6358	1.8809	1.6874	1.7358	1.73	1.7286	1.7394	1.7567	1.9098	1.857	1.8433	1.8033	1.8348	1.8874
8.5387	277.103	0.4558	0.3641	0.4101	0.4302	0.4093	0.6376	0.575	0.3494	0.4539	0.4585	0.6205	0.7627	0.7767	0.7923	0.877	0.787	0.6398	0.8825	0.7673	0.775	0.4997	0.4666	0.5047	0.5268	0.5359	0.6822	0.5974	0.4981	0.5357	0.541	0.3789	0.4275	0.4052	0.3771	0.3932	0.4045
8.5536	167.069	0.1995	0.1954	0.1734	0.2448	0.2192	0.2236	0.1846	0.214	0.2068	0.2089	0.2357	0.2091	0.1732	0.2073	0.1741	0.1925	0.2121	0.1631	0.1959	0.1978	0.2096	0.1998	0.1742	0.2377	0.2109	0.2179	0.1935	0.206	0.2052	0.2072	0.2475	0.2571	0.2362	0.2802	0.2527	0.2599
8.6365	200.163	0.1882	0.2993	0.2186	0.2004	0.1683	0.261	0.2265	0.165	0.2159	0.2181	0.1804	0.1804	0.1536	0.1616	0.219	0.2019	0.2085	0.2342	0.1925	0.1944	0.1872	0.2708	0.2033	0.1925	0.1839	0.2486	0.2242	0.1873	0.2112	0.2133	0.2124	0.1935	0.2437	0.2477	0.2221	0.2284
8.6377	263.125	0.858	0.9248	0.9546	1.2161	0.9922	1.1898	1.2904	0.9614	1.0484	1.0589	0.436	0.4265	0.488	0.569	0.5573	0.5421	0.4529	0.412	0.4855	0.4903	0.7558	0.8036	0.8416	1.0633	0.8951	1.0367	1.0899	0.8412	0.9119	0.921	1.0702	0.9914	1.0422	1.1442	1.0514	1.0815
8.6875	313.163	0.2184	0.2319	0.2886	0.3328	0.2768	0.2356	0.2324	0.3531	0.2712	0.2739	0.3404	0.2964	0.3139	0.3338	0.3382	0.4102	0.3995	0.3777	0.3513	0.3548	0.2503	0.2493	0.2964	0.3364	0.2968	0.2825	0.2774	0.3684	0.2929	0.2959	0.354	0.3165	0.3808	0.3957	0.3581	0.3684
8.6948	169.121	0.6767	0.6373	0.6655	0.7529	0.5561	0.7484	0.6999	0.6604	0.6747	0.6814	0.5887	0.5804	0.4597	0.5682	0.6758	0.6201	0.7656	0.6157	0.6093	0.6154	0.6579	0.6261	0.6169	0.7133	0.5953	0.7233	0.7238	0.6652	0.6619	0.6685	0.7677	0.7095	0.7181	0.6053	0.6931	0.713
8.699	209.114	0.9055	0.9505	0.8824	1.1554	0.9235	1.1615	0.9488	0.9533	0.9851	0.995	0.7336	0.7293	0.6758	0.6556	0.9788	0.867	1.0432	0.79	0.8092	0.8173	0.8667	0.8994	0.8347	1.0395	0.9516	1.0982	0.9826	0.9343	0.9461	0.9555	1.0299	0.9126	0.9811	0.9953	0.9699	0.9977
8.7108	139.111	0.2257	0.2441	0.2953	0.3059	0.2656	0.3298	0.3339	0.306	0.2883	0.2912	0.2673	0.3073	0.287	0.2491	0.3096	0.3029	0.2573	0.2643	0.2806	0.2834	0.2373	0.2613	0.2947	0.2945	0.2809	0.3263	0.3178	0.3027	0.2879	0.2908	0.4755	0.5356	0.4906	0.4576	0.4849	0.4988
8.7126	197.114	0.585	0.6087	0.4903	0.5767	0.541	0.6254	0.6225	0.5896	0.5799	0.5857	0.7695	0.6576	0.56	0.5857	0.7502	0.7724	0.6536	0.8409	0.6987	0.7057	0.6345	0.6241	0.5104	0.5848	0.603	0.6693	0.6368	0.6703	0.6132	0.6193	0.7808	0.7262	0.6496	0.614	0.6857	0.7054
8.7501	239.124	0.5003	0.601	0.5757	0.5043	0.5713	0.611	0.529	0.6463	0.5674	0.573	0.5167	0.8026	0.8665	0.9042	0.7462	0.8103	0.5842	0.6677	0.7373	0.7447	0.507	0.6549	0.652	0.6113	0.6249	0.6681	0.5485	0.6681	0.6135	0.6196	0.6471	0.6538	0.7897	0.6319	0.6738	0.6931
8.7561	213.147	0.2044	0.2784	0.1839	0.2313	0.1996	0.1805	0.2379	0.2134	0.2162	0.2183	0.247	0.2324	0.2901	0.2962	0.2183	0.2899	0.2484	0.2079	0.2538	0.2563	0.2162	0.2682	0.2116	0.2502	0.2074	0.2103	0.243	0.2173	0.2269	0.2291	0.2886	0.2626	0.2438	0.2684	0.2632	0.2707
8.7735	181.119	0.4263	0.4502	0.4858	0.4277	0.519	0.5641	0.558	0.7096	0.5176	0.5228	0.4094	0.3936	0.3794	0.4449	0.4542	0.4162	0.5509	0.4699	0.4398	0.4442	0.4242	0.4382	0.4614	0.4364	0.5101	0.5321	0.5619	0.6644	0.5008	0.5058	0.56	0.5308	0.4079	0.5536	0.5079	0.5225
8.808	169.121	0.3904	0.4158	0.3209	0.352	0.3383	0.4273	0.4399	0.4343	0.3899	0.3938	0.3745	0.373	0.3622	0.3012	0.4849	0.4055	0.4016	0.3595	0.3828	0.3866	0.3884	0.4071	0.333	0.3426	0.3811	0.4261	0.4346	0.4255	0.3902	0.3941	0.4921	0.4459	0.4941	0.4435	0.4642	0.4775
8.8091	177.054	0.3513	0.3038	0.3052	0.2889	0.3525	0.2731	0.3107	0.3431	0.3161	0.3192	0.4436	0.3722	0.2923	0.3304	0.3704	0.3422	0.3676	0.3417	0.3576	0.3611	0.3764	0.3226	0.3035	0.3024	0.3624	0.2935	0.3284	0.3513	0.3283	0.3316	0.5597	0.5525	0.4836	0.4796	0.5137	0.5284
8.8169	245.083	0.3653	0.3807	0.467	0.4202	0.4496	0.4405	0.4909	0.3808	0.4244	0.4286	0.4335	0.4999	0.3631	0.4116	0.4814	0.5415	0.6144	0.556	0.4877	0.4926	0.3844	0.4127	0.4431	0.4222	0.4645	0.4708	0.5274	0.4363	0.4427	0.4471	0.7267	0.5757	0.659	0.564	0.625	0.6429
8.8377	182.117	0.2355	0.1629	0.2113	0.1576	0.1982	0.2244	0.1759	0.2219	0.1985	0.2004	0.2376	0.2074	0.2661	0.2073	0.2554	0.1885	0.1796	0.2659	0.226	0.2282	0.2372	0.175	0.2262	0.1718	0.2159	0.2175	0.1786	0.239	0.2065	0.2086	0.2352	0.2777	0.2696	0.2546	0.2567	0.264
8.9284	266.172	3.8251	3.6334	3.7161	2.922	4.2892	2.7113	2.9837	4.7429	3.603	3.639	1.595	2.829	2.4689	2.3562	1.9492	2.2237	1.7804	2.6248	2.2284	2.2507	3.2813	3.4485	3.4199	2.8069	3.751	2.6146	2.7072	4.3055	3.2755	3.3081	3.9046	3.8661	4.0919	4.2073	3.9773	4.0913
8.9286	226.179	6.1477	5.4682	5.635	7.0496	7.0385	4.2586	4.5066	4.5554	5.5825	5.6383	2.2482	3.8295	3.3067	3.1295	2.4137	3.3584	2.4773	3.7089	3.059	3.0896	5.194	5.0818	5.0755	6.1205	5.9532	4.0724	4.0349	4.4471	4.9756	5.0251	5.6757	5.6381	5.7654	5.8471	5.6743	5.8368
8.9297	244.19	3.121	2.718	2.3349	3.3492	3.3256	2.0471	2.0978	2.8258	2.7274	2.7547	1.6326	2.4036	1.8425	1.8987	1.3284	1.9348	1.531	1.8936	1.8082	1.8262	2.7609	2.6522	2.2223	3.0128	2.8612	2.0393	1.9746	2.6517	2.5102	2.5352	3.514	3.4686	3.6412	3.4282	3.4779	3.5775
8.9342	291.119	0.9614	1.135	1.0782	1.0454	0.7857	1.4156	1.0241	0.8877	1.0416	1.0521	0.6776	0.7816	0.9939	0.9348	0.882	0.7447	0.6634	0.7514	0.8037	0.8117	0.8946	1.0514	1.0624	1.0277	0.8223	1.2589	0.9425	0.8741	0.9873	0.9971	0.7916	0.824	0.9176	0.9065	0.8513	0.8757
8.9448	231.158	0.978	0.9403	1.1294	1.2009	1.0504	0.8891	1.0123	1.0541	1.0318	1.0421	0.9292	0.9525	0.855	1.0656	1.1277	1.1184	1.2078	1.1363	1.0491	1.0596	0.9706	0.9481	1.0658	1.1784	1.0861	0.9567	1.0725	1.102	1.0419	1.0523	1.0261	0.9924	1.1884	1.0216	1.0466	1.0765
8.954	239.125	3.2172	3.1434	3.5021	3.9377	3.4418	2.8645	3.5063	3.4956	3.3886	3.4225	3.4258	3.31	3.1426	3.5004	3.8587	3.9097	4.1075	3.6949	3.6187	3.6549	3.2861	3.2012	3.429	3.8656	3.6008	3.1604	3.6954	3.6353	3.4656	3.5	4.1681	4.1852	4.091	3.9916	4.0679	4.1844
8.9797	158.152	0.3747	0.4466	0.4399	0.3966	0.3812	0.416	0.4065	0.4161	0.4097	0.4138	0.4778	0.4862	0.4376	0.3757	0.4403	0.4338	0.4935	0.4175	0.4453	0.4498	0.4026	0.4588	0.4415	0.3952	0.4021	0.4248	0.4328	0.4269	0.421	0.4252	0.5346	0.5004	0.4368	0.4515	0.476	0.4897
8.9853	360.273	0.2887	0.2835	0.2363	0.2543	0.2591	0.3263	0.3122	0.2238	0.273	0.2758	0.1468	0.1357	0.1906	0.1799	0.1369	0.1347	0.1284	0.1788	0.154	0.1555	0.2543	0.2476	0.226	0.2379	0.2315	0.2808	0.2685	0.2176	0.2444	0.2469	0.2428	0.2054	0.2496	0.2247	0.2283	0.2349
8.9988	266.17	0.2219	0.1645	0.121	0.2282	0.2313	0.2184	0.2103	0.2415	0.2046	0.2067	0.1787	0.2246	0.2908	0.1917	0.2713	0.3151	0.2094	0.3063	0.2485	0.251	0.2121	0.1805	0.1645	0.2212	0.2451	0.2453	0.2122	0.2645	0.2169	0.219	0.2834	0.2682	0.3253	0.2444	0.2775	0.2855
9.0258	233.114	0.5101	0.5369	0.5423	0.5181	0.5003	0.4973	0.4972	0.6571	0.5324	0.5377	0.5378	0.5688	0.4894	0.5898	0.5134	0.5501	0.6076	0.5714	0.5535	0.5591	0.5197	0.5476	0.5317	0.5416	0.5112	0.5158	0.5304	0.651	0.5407	0.5461	0.5236	0.6128	0.6264	0.4974	0.5594	0.5754
9.0314	300.18	0.2871	0.3274	0.2942	0.3002	0.3759	0.2949	0.2678	0.2562	0.3005	0.3035	0.3175	0.2684	0.3089	0.2203	0.2197	0.1895	0.2544	0.1819	0.2451	0.2475	0.2962	0.3141	0.2994	0.2828	0.3413	0.271	0.2671	0.2431	0.2881	0.291	0.2664	0.2443	0.2668	0.2398	0.2518	0.259
9.036	277.14	1.124	1.1468	1.2758	1.415	1.0791	1.2314	1.0676	1.1035	1.1804	1.1922	0.6339	0.6072	0.6498	0.5167	0.3923	0.6039	0.6446	0.6529	0.5877	0.5935	1.0059	1.0163	1.1242	1.2001	0.9184	1.0839	0.9706	1.0128	1.0371	1.0474	0.9523	0.9914	0.969	1.1024	0.9937	1.0222
9.0406	235.149	0.2992	0.3012	0.2858	0.296	0.2788	0.2851	0.3003	0.3018	0.2935	0.2965	0.3629	0.3446	0.2634	0.3645	0.3103	0.3847	0.3847	0.3956	0.3513	0.3549	0.3168	0.3137	0.2816	0.3164	0.2911	0.3134	0.3249	0.334	0.3098	0.3128	0.4654	0.4058	0.4099	0.4013	0.4164	0.4283
9.0418	237.147	1.3509	1.5416	1.4075	1.7322	1.3092	1.6406	1.2629	1.3389	1.448	1.4625	0.7224	0.7372	0.7166	0.6702	0.6018	0.658	0.6766	0.5945	0.6722	0.6789	1.199	1.3462	1.2401	1.4787	1.1467	1.4067	1.1262	1.177	1.2599	1.2725	1.2083	1.0438	1.0241	1.0104	1.0609	1.0913
9.0523	455.224	0.1981	0.2174	0.1999	0.24	0.229	0.2532	0.2627	0.2241	0.2281	0.2303	0.3509	0.3448	0.3169	0.3037	0.3858	0.3524	0.3859	0.3847	0.3531	0.3567	0.2377	0.2507	0.2305	0.2586	0.2728	0.2811	0.2968	0.2719	0.2609	0.2635	0.301	0.3206	0.3324	0.3486	0.3224	0.3316
9.0533	317.279	0.7905	0.7719	0.6514	0.7138	0.6461	0.6769	0.7224	0.6545	0.7034	0.7105	0.5746	0.5881	0.5142	0.5855	0.6435	0.6941	0.56	0.5709	0.5914	0.5973	0.74	0.7294	0.62	0.6882	0.6551	0.6882	0.6883	0.6489	0.679	0.6858	0.7288	0.5486	0.5442	0.5864	0.596	0.6131
9.0652	252.16	0.3172	0.2541	0.2785	0.2965	0.3511	0.3407	0.299	0.2692	0.3008	0.3038	0.2386	0.2668	0.2469	0.2714	0.2207	0.2309	0.1836	0.2299	0.2361	0.2385	0.299	0.2586	0.2719	0.2931	0.3228	0.3162	0.2726	0.2656	0.2861	0.289	0.293	0.2345	0.3294	0.2926	0.2845	0.2927
9.07	177.163	0.1958	0.2305	0.1749	0.2085	0.2361	0.1637	0.2518	0.234	0.2119	0.214	0.2507	0.2275	0.2095	0.2145	0.2253	0.2491	0.2125	0.2539	0.2304	0.2327	0.2107	0.2309	0.1845	0.2121	0.2369	0.1872	0.2443	0.2451	0.2178	0.2199	0.3573	0.2885	0.2626	0.2696	0.2916	0.2999
9.0786	158.152	0.4181	0.4657	0.5063	0.5424	0.6112	0.6413	0.5584	0.5942	0.5422	0.5476	0.5916	0.4289	0.4376	0.4913	0.4894	0.6335	0.6211	0.5479	0.5302	0.5355	0.464	0.4587	0.4915	0.5348	0.589	0.6459	0.5801	0.5969	0.5422	0.5476	0.7453	0.654	0.7449	0.766	0.7203	0.7409
9.1062	413.176	1.1733	1.3849	1.4084	1.3216	1.27	1.3173	1.3278	1.2668	1.3088	1.3219	1.1852	0.9898	1.0489	1.0876	1.1311	1.1687	1.0633	1.1683	1.1054	1.1164	1.1822	1.2921	1.3247	1.2751	1.2533	1.2928	1.2739	1.2726	1.2646	1.2772	0.794	0.7507	0.8052	0.7251	0.7611	0.7829
9.1079	267.122	2.94	2.1981	2.2828	2.2165	1.4562	1.9093	2.2176	1.6872	2.1135	2.1346	1.4454	2.2606	1.7838	1.4925	1.5084	1.7218	2.3409	2.0366	1.8238	1.842	2.5774	2.2249	2.1683	2.054	1.4915	1.881	2.2717	1.8211	2.052	2.0724	1.5681	1.6005	1.5837	1.5728	1.5655	1.6103
9.1103	409.161	17.6711	19.8316	20.3968	20.3503	14.7271	18.1013	21.999	25.0391	19.7645	19.9622	18.3017	24.5551	21.2987	21.0622	20.1162	22.9477	27.4795	25.4756	22.6546	22.8811	17.9196	21.1234	20.7276	20.7353	16.3357	19.5223	23.6216	25.7797	20.605	20.8097	16.2561	16.441	16.9215	16.1939	16.2886	16.7553
9.1119	425.135	3.978	3.0037	3.2716	3.5065	2.3523	3.0217	3.6174	3.3302	3.2602	3.2928	4.3506	6.9109	5.4096	5.0834	5.2156	6.0734	6.7265	6.963	5.8416	5.9	4.0922	4.0053	3.828	3.9437	3.1249	3.831	4.4475	4.3671	3.9308	3.9699	4.8136	4.6847	5.0307	4.7488	4.7713	4.908
9.1384	274.274	110.7	132.052	114.234	177.73	130.165	122.948	128.191	118.63	129.331	130.625	156.508	126.412	131.779	144.678	166.264	144.467	150.055	132.286	144.056	145.497	122.827	131.288	119.241	171.079	141.413	129.692	135.076	125.18	133.773	135.102	215.308	210.807	215.926	211.484	211.248	217.301
9.1582	361.303	0.4268	0.4453	0.4427	0.4522	0.5016	0.3313	0.4779	0.4049	0.4353	0.4397	0.5095	0.4489	0.4779	0.4505	0.6154	0.444	0.5342	0.4832	0.4955	0.5004	0.4498	0.4484	0.4538	0.4563	0.5384	0.3634	0.4971	0.4356	0.453	0.4575	0.4786	0.4467	0.5434	0.4586	0.477	0.4907
9.1639	318.299	43.9182	41.5409	39.7583	41.1658	42.8099	33.7191	37.5679	44.3118	40.599	41.005	48.9985	50.0232	44.1901	37.289	52.8857	49.0569	45.581	52.3219	47.5433	48.0187	45.4229	43.8904	41.0782	40.5889	46.0466	37.9759	39.9954	47.5222	42.5801	43.0032	55.1073	53.6184	55.9025	52.7132	53.792	55.3333
9.1698	302.268	2.6876	3.0361	2.736	2.3761	2.6902	2.9479	2.8961	2.8789	2.7811	2.8089	3.4723	2.7312	2.8613	3.0721	2.9905	3.1616	3.2037	3.1592	3.0815	3.1123	2.8993	2.9743	2.7815	2.5773	2.8079	3.0325	3.0041	3.0245	2.8725	2.9011	2.1635	2.1462	2.2408	2.1001	2.141	2.2024
9.1822	256.262	0.3657	0.3928	0.3866	0.275	0.3461	0.376	0.3465	0.3494	0.3548	0.3583	0.4616	0.374	0.3726	0.4034	0.34	0.3867	0.3587	0.3565	0.3817	0.3855	0.3918	0.39	0.385	0.3105	0.3497	0.3826	0.3531	0.36	0.3635	0.3672	0.3984	0.3496	0.3586	0.3723	0.366	0.3765
9.1831	362.325	14.1756	12.7519	12.4418	12.3772	13.8172	13.6632	12.5961	9.4778	12.6626	12.7892	16.1931	17.3134	14.4925	12.2935	16.6534	16.8645	16.0447	18.3714	16.0283	16.1886	14.7567	13.9674	13.0225	12.4796	14.7548	14.6193	13.6044	12.0493	13.5838	13.7188	16.4219	16.3966	16.029	15.9838	16.0457	16.5055
9.1886	272.257	6.5445	6.6378	6.1058	6.9273	6.3421	6.2637	6.1023	5.5101	6.3042	6.3672	7.4608	6.164	6.1902	6.6471	7.7039	7.1431	7.4709	6.7546	6.9418	7.0112	6.8089	6.5514	6.158	6.9251	6.7879	6.552	6.5137	5.9745	6.5004	6.565	7.5653	7.2361	7.1756	7.5482	7.3075	7.5169
9.2119	159.137	1.2793	1.5197	1.3962	1.4571	1.5872	1.2682	1.4671	1.5109	1.4357	1.4501	1.9565	1.7017	1.6039	1.6915	1.7799	1.8676	1.852	1.9362	1.7987	1.8166	1.4568	1.5733	1.4557	1.5314	1.6606	1.434	1.5803	1.6603	1.5354	1.5507	1.7114	1.7054	1.6292	1.4328	1.6035	1.6494
9.2134	258.242	0.6091	0.6819	0.5828	0.5903	0.6414	0.5352	0.5995	0.5932	0.6042	0.6102	0.6784	0.4632	0.5365	0.563	0.5776	0.7372	0.6446	0.6828	0.6104	0.6165	0.6297	0.6301	0.5741	0.5892	0.6346	0.5922	0.6171	0.6316	0.6091	0.6152	0.528	0.4887	0.5151	0.5686	0.5198	0.5347
9.241	211.13	1.0495	1.1354	1.0214	1.2477	1.0965	1.6451	1.4496	1.188	1.2292	1.2414	0.8584	0.6267	0.6913	0.6194	0.6071	0.8579	0.7608	0.6533	0.7094	0.7165	1.0065	1.0126	0.9432	1.1	0.9869	1.4611	1.2887	1.0773	1.1046	1.1156	1.2366	1.4344	1.5209	1.4404	1.394	1.4339
9.2726	538.429	0.3903	0.3076	0.3166	0.4255	0.5177	0.2798	0.4417	0.457	0.392	0.3959	0.5107	0.5586	0.4739	0.3315	0.6654	0.7025	0.458	0.5228	0.5279	0.5332	0.4227	0.3725	0.3579	0.4058	0.5635	0.3905	0.4504	0.4857	0.4286	0.4328	0.4652	0.4535	0.4921	0.503	0.4737	0.4872
9.2758	191.143	0.2353	0.2098	0.182	0.228	0.2286	0.2373	0.2382	0.2596	0.2274	0.2296	0.302	0.2441	0.2393	0.2645	0.297	0.2801	0.2887	0.2674	0.2729	0.2756	0.2533	0.2195	0.1974	0.2396	0.2496	0.2506	0.2535	0.2681	0.2401	0.2425	1.2848	1.4195	1.2685	1.3373	1.3142	1.3519
9.276	183.091	0.3157	0.3252	0.2605	0.3783	0.3052	0.2731	0.2845	0.3824	0.3156	0.3188	0.3823	0.3085	0.3132	0.3502	0.3334	0.3253	0.3902	0.3848	0.3485	0.352	0.3341	0.3226	0.2751	0.3749	0.317	0.2892	0.3144	0.3926	0.3257	0.3289	0.4343	0.4001	0.3919	0.3698	0.395	0.4064
9.3687	259.093	1.368	1.3433	1.3862	1.3882	1.1158	1.1597	1.3376	1.1024	1.2752	1.2879	1.5219	1.5271	1.3553	1.1947	1.289	1.4405	1.6618	1.5279	1.4398	1.4542	1.4138	1.3964	1.3854	1.3527	1.1771	1.2432	1.434	1.2417	1.3239	1.337	1.6151	1.5305	1.5848	1.647	1.5784	1.6236
9.3699	339.176	1.374	1.5832	1.5027	1.8402	1.6124	1.611	1.6183	1.5017	1.5804	1.5962	2.1523	2.302	2.2101	2.3736	2.1912	2.3334	2.4517	2.4583	2.3091	2.3322	1.5775	1.7726	1.6889	1.9946	1.7856	1.8117	1.8474	1.7904	1.7734	1.791	2.1472	2.0182	2.0714	1.8788	2.0086	2.0662
9.371	299.181	0.5463	0.5363	0.4901	0.6	0.5526	0.5664	0.6141	0.5694	0.5594	0.565	0.5563	0.5048	0.565	0.7659	0.5709	0.6981	0.5404	0.5861	0.5984	0.6044	0.5516	0.531	0.5115	0.6483	0.5656	0.6058	0.6016	0.588	0.5724	0.5781	0.752	0.5668	0.7614	0.6147	0.667	0.6861
9.3802	253.143	0.334	0.3428	0.374	0.4388	0.3255	0.3796	0.3481	0.3863	0.3661	0.3698	0.4167	0.3856	0.3006	0.439	0.4437	0.4373	0.5092	0.3923	0.4156	0.4197	0.3566	0.3553	0.3574	0.4432	0.3608	0.3982	0.3927	0.3975	0.3807	0.3844	0.4947	0.4856	0.4374	0.503	0.4754	0.489
9.3917	309.202	0.5583	0.6972	0.6412	0.7373	0.6919	0.7368	0.7159	0.7231	0.6877	0.6946	0.9105	0.8427	0.8437	0.887	0.7847	0.9516	0.9053	0.9593	0.8856	0.8945	0.6501	0.7374	0.6956	0.7828	0.7262	0.7991	0.7715	0.8032	0.7416	0.7489	0.8439	0.7655	0.7293	0.8126	0.7799	0.8023
9.4038	277.178	0.6054	0.6934	0.824	0.5549	0.6164	0.5393	0.4838	0.5306	0.606	0.612	0.7508	0.6865	0.5892	0.4693	0.8286	0.7044	0.8684	0.8558	0.7191	0.7263	0.6452	0.6951	0.7689	0.5386	0.6803	0.5869	0.5868	0.6292	0.6379	0.6443	0.6457	0.607	0.6768	0.6564	0.64	0.6583
9.4284	187.147	0.3396	0.4306	0.3949	0.3461	0.4988	0.6315	0.5477	0.4869	0.4595	0.4641	0.3142	0.2689	0.228	0.2477	0.264	0.311	0.2348	0.2787	0.2684	0.2711	0.3349	0.3919	0.3547	0.3245	0.4458	0.5562	0.4735	0.4444	0.4138	0.4179	0.3214	0.3286	0.3828	0.4602	0.3695	0.3801
9.4456	263.161	2.5286	2.6379	2.5584	3.544	2.6179	3.6041	3.7794	2.4588	2.9661	2.9958	0.4751	0.4544	0.6517	0.734	0.4431	0.5337	0.5889	0.5245	0.5507	0.5562	2.0228	2.0998	2.0898	2.8629	2.0972	2.8576	3.0041	2.0125	2.3721	2.3957	2.9511	2.9951	2.9857	3.1482	2.9898	3.0755
9.4463	223.168	3.5776	3.957	3.4681	4.9831	3.8224	4.2262	5.674	3.3661	4.1343	4.1757	0.8426	0.5864	0.8674	0.8045	0.5144	0.6432	0.7164	0.6323	0.7009	0.7079	2.905	3.1257	2.8289	3.9674	3.0279	3.3553	4.4672	2.7326	3.2894	3.3221	4.3274	3.9656	4.2214	4.1307	4.1197	4.2377
9.4485	245.15	1.9174	2.1411	1.9264	2.8187	2.1679	2.0512	2.4829	2.1543	2.2075	2.2296	0.4916	0.3561	0.5975	0.4967	0.3913	0.427	0.4794	0.3602	0.45	0.4545	1.567	1.7011	1.6005	2.2548	1.7429	1.6578	1.9971	1.7372	1.7755	1.7932	2.0572	2.1304	2.0685	2.2224	2.0984	2.1586
9.478	215.163	0.1511	0.1662	0.1478	0.1776	0.1391	0.1491	0.0957	0.1283	0.1444	0.1458	0.1549	0.166	0.1574	0.161	0.1875	0.1975	0.1844	0.1854	0.1743	0.176	0.1528	0.167	0.151	0.1751	0.1536	0.163	0.1193	0.1465	0.1527	0.1542	0.2936	0.266	0.2699	0.2307	0.2624	0.2699
9.5488	172.168	0.9279	1.3466	0.9608	0.7687	0.744	1.0729	1.0204	1.0406	0.9852	0.9951	1.4288	1.4029	1.0764	1.1586	0.7652	1.2829	0.9605	0.9698	1.1306	1.1419	1.0591	1.3675	0.9948	0.8758	0.7606	1.1374	1.0155	1.048	1.0275	1.0377	1.1014	0.9402	0.8964	0.9796	0.9696	0.9974
9.5507	194.149	0.1665	0.2466	0.2123	0.2185	0.1835	0.2637	0.205	0.1694	0.2082	0.2103	0.3708	0.3463	0.2391	0.2475	0.2262	0.2831	0.2955	0.2965	0.2881	0.291	0.2189	0.273	0.2201	0.2281	0.1972	0.2713	0.2302	0.207	0.2296	0.2318	0.2252	0.1957	0.2232	0.2218	0.2143	0.2205
9.5743	195.101	1.8033	2.0632	1.9201	2.1141	2.0821	2.0031	2.0262	2.0401	2.0065	2.0266	2.7338	2.4353	2.2248	2.4575	2.5619	2.9459	2.6385	2.9057	2.6129	2.6391	2.0474	2.1675	2.0067	2.2228	2.2369	2.2641	2.2031	2.3183	2.171	2.1925	3.0336	2.6891	2.9941	2.6483	2.8129	2.8935
9.6024	119.085	2.5833	2.2424	2.3012	2.1313	2.0584	2.1267	2.2679	2.3886	2.2625	2.2851	1.8107	1.8739	1.696	1.6544	1.6511	2.0472	1.8496	1.7588	1.7927	1.8106	2.4012	2.1606	2.16	2.031	1.9844	2.1281	2.1843	2.283	2.1563	2.1777	1.7543	1.8009	1.7109	1.7239	1.73	1.7796
9.6028	281.137	1.9797	1.9088	1.8645	1.9211	1.6984	1.8824	1.712	1.5859	1.8191	1.8373	1.5822	1.5846	1.5454	1.6397	1.5525	1.963	1.6553	1.6961	1.6524	1.6689	1.8893	1.8365	1.7933	1.8686	1.6863	1.9222	1.715	1.6545	1.7871	1.8048	1.6627	1.5895	1.5749	1.5411	1.5761	1.6213
9.6029	135.079	0.8377	0.6522	0.7163	0.7445	0.7073	0.7127	0.589	0.738	0.7122	0.7193	0.6374	0.6362	0.5728	0.5984	0.6856	0.7316	0.7953	0.6841	0.6677	0.6744	0.7914	0.6514	0.6837	0.7147	0.7123	0.7248	0.6476	0.7423	0.7049	0.7119	0.6246	0.7085	0.7355	0.6208	0.6656	0.6847
9.6038	415.211	59.394	57.3739	53.4812	53.6279	49.3875	49.6597	47.9759	51.6028	52.8129	53.341	47.5718	48.7352	47.2004	46.4765	49.7008	57.5049	51.4952	54.772	50.4321	50.9364	56.7086	55.4795	52.1652	52.3406	50.209	52.1678	49.3632	53.7248	52.5048	53.0266	45.5223	42.703	44.8524	42.7944	43.5283	44.7756
9.605	295.117	1.1982	1.0692	1.2002	1.1958	1.0718	1.0911	1.0824	1.1948	1.1379	1.1493	0.9717	0.999	0.8936	1.0093	0.9562	1.1744	1.0982	1.0415	1.018	1.0282	1.1471	1.0568	1.1288	1.1602	1.0581	1.1235	1.0975	1.1844	1.1139	1.125	0.9386	0.9225	0.9154	0.8872	0.9068	0.9327
9.61	398.204	0.3669	0.3358	0.3091	0.2755	0.2878	0.2443	0.3057	0.2669	0.299	0.302	0.3222	0.2127	0.2426	0.2098	0.3092	0.3352	0.2528	0.2987	0.2729	0.2756	0.3575	0.3064	0.2939	0.2615	0.2976	0.27	0.2953	0.2819	0.2941	0.297	0.2941	0.2483	0.2579	0.2672	0.2642	0.2718
9.6348	346.33	2.9378	2.6201	2.3586	2.8826	2.9677	1.8654	2.1694	2.6124	2.5518	2.5773	3.8875	4.625	3.201	2.4204	4.4905	3.6373	3.2499	4.0273	3.6924	3.7293	3.1925	3.1394	2.5832	2.7936	3.4043	2.3365	2.4672	3.0491	2.8543	2.8826	3.776	3.6357	3.6687	3.8286	3.69	3.7957
9.6653	219.173	0.3024	0.3179	0.3666	0.2218	0.3276	0.3112	0.2799	0.1808	0.2885	0.2914	0.3399	0.282	0.264	0.1899	0.2696	0.2783	0.2863	0.2409	0.2689	0.2716	0.3134	0.3104	0.3425	0.2159	0.3176	0.306	0.2844	0.2011	0.2852	0.288	0.2757	0.3043	0.2893	0.2981	0.2889	0.2972
9.6809	237.145	3.0934	3.3565	3.1165	2.8619	3.4868	3.4598	4.9564	3.4863	3.4772	3.512	0.7502	0.4562	0.5399	0.5165	0.5076	0.4966	0.5269	0.5864	0.5475	0.553	2.5173	2.641	2.4816	2.2924	2.772	2.7392	3.877	2.8122	2.756	2.7834	2.7681	2.526	2.9466	2.437	2.6427	2.7185
9.6895	199.167	0.3806	0.2999	0.3107	0.331	0.3709	0.27	0.2938	0.3337	0.3238	0.3271	0.4784	0.4866	0.3387	0.3339	0.4093	0.432	0.4815	0.3888	0.4187	0.4228	0.4072	0.3485	0.3193	0.335	0.3864	0.3141	0.3447	0.3565	0.3496	0.3531	0.4638	0.5429	0.4642	0.3952	0.4619	0.4751
9.6911	512.332	0.6624	0.8685	0.6646	0.578	0.7088	0.7187	0.6399	0.6525	0.6867	0.6935	0.4606	0.4157	0.3766	0.3632	0.2871	0.4639	0.4236	0.552	0.4178	0.422	0.6148	0.7585	0.5952	0.529	0.6108	0.661	0.5913	0.6424	0.6225	0.6287	0.4861	0.6505	0.6167	0.5964	0.5816	0.5982
9.6912	111.116	0.33	0.3484	0.2522	0.2673	0.3124	0.3124	0.3292	0.3256	0.3097	0.3128	0.3281	0.3632	0.267	0.2901	0.3287	0.4236	0.465	0.3389	0.3506	0.3541	0.3312	0.3539	0.2572	0.2758	0.3213	0.344	0.3672	0.3372	0.3217	0.3249	0.3857	0.3976	0.3743	0.3764	0.3797	0.3905
9.6922	258.278	1.7977	1.8195	1.6753	1.882	2.0928	1.6083	1.678	1.863	1.8021	1.8201	2.3258	2.419	1.93	1.7727	2.3079	2.5006	2.2161	2.2597	2.2165	2.2386	1.9401	1.98	1.7481	1.8729	2.1796	1.8523	1.8324	2.0137	1.9168	1.9359	2.5518	2.5201	2.2528	2.2228	2.363	2.4307
9.7261	283.186	0.7693	0.7763	0.7349	0.6671	0.8028	0.6244	0.6869	0.7723	0.7293	0.7365	0.6639	0.6977	0.5366	0.5709	0.6835	0.7747	0.8143	0.7814	0.6904	0.6973	0.7466	0.7603	0.6885	0.6492	0.7841	0.6691	0.7264	0.794	0.7235	0.7307	0.7239	0.7635	0.7941	0.9627	0.8029	0.8259
9.735	316.315	0.2721	0.3617	0.3258	0.3775	0.3182	0.2655	0.33	0.3832	0.3293	0.3325	0.4068	0.3362	0.3561	0.4328	0.4262	0.3632	0.4219	0.4553	0.3998	0.4038	0.3075	0.3571	0.3351	0.3954	0.3508	0.2931	0.3568	0.4117	0.3489	0.3524	0.3751	0.3765	0.2972	0.3627	0.3493	0.3594
9.7825	489.319	0.6173	0.5703	0.5808	0.6142	0.5958	0.7858	0.5696	0.8191	0.6441	0.6506	0.493	0.5818	0.4836	0.5646	0.5215	0.5463	0.6063	0.4834	0.5351	0.5404	0.589	0.5761	0.5592	0.6077	0.5856	0.7327	0.5848	0.7515	0.6201	0.6263	0.4395	0.4855	0.496	0.4107	0.4533	0.4663
9.8025	512.333	4.2221	3.9914	4.3652	3.8607	4.3415	3.8341	4.3294	3.8782	4.1028	4.1439	2.9908	2.2829	2.2529	2.3867	2.0544	2.7321	2.4908	3.0791	2.5337	2.559	3.9325	3.58	3.8538	3.5234	3.8177	3.5921	3.9045	3.7654	3.729	3.7661	3.2255	3.2959	3.3033	3.0614	3.1893	3.2807
9.8067	534.315	1.2097	1.1159	1.0883	0.9266	1.0397	1.1604	1.1669	1.0995	1.1009	1.1119	0.734	0.5619	0.734	0.5589	0.6108	0.7613	0.6647	0.7907	0.677	0.6838	1.0957	0.9816	1.0043	0.8421	0.9449	1.0704	1.0507	1.0459	0.9999	1.0098	0.7466	0.7509	0.8697	0.8366	0.7929	0.8157
9.8687	430.887	0.2193	0.3235	0.2382	0.2673	0.2116	0.2503	0.2278	0.2595	0.2497	0.2522	0.2371	0.2312	0.2206	0.2302	0.2279	0.2717	0.2872	0.295	0.2501	0.2526	0.2249	0.3018	0.235	0.2605	0.219	0.2583	0.2453	0.2753	0.2512	0.2537	0.2422	0.2332	0.2608	0.1989	0.2314	0.2381
9.8689	240.228	0.3643	0.3017	0.2872	0.2693	0.2735	0.3731	0.3105	0.2687	0.306	0.3091	0.355	0.4005	0.2839	0.2572	0.2556	0.2758	0.2381	0.3134	0.2974	0.3004	0.3638	0.3282	0.2878	0.2689	0.273	0.3521	0.2952	0.2872	0.3056	0.3086	0.2501	0.2074	0.2965	0.2126	0.2392	0.2461
9.8697	432.884	0.2055	0.2443	0.207	0.1865	0.1943	0.2074	0.1865	0.183	0.2018	0.2038	0.2289	0.2497	0.2063	0.1801	0.2165	0.2723	0.1943	0.2916	0.23	0.2323	0.2124	0.2469	0.2079	0.1867	0.2029	0.2261	0.1904	0.2161	0.2101	0.2121	0.1667	0.156	0.151	0.1514	0.1547	0.1591
9.8699	365.274	0.2903	0.2356	0.2861	0.2425	0.2346	0.2482	0.208	0.2503	0.2495	0.2519	0.2626	0.3393	0.3003	0.261	0.3065	0.2289	0.2693	0.2323	0.275	0.2778	0.2848	0.263	0.2911	0.2496	0.2566	0.2458	0.2258	0.2518	0.2573	0.2599	0.2904	0.2521	0.3457	0.3425	0.3046	0.3133
9.8769	343.294	3.7101	3.3207	3.3869	3.1838	3.6967	3.3884	3.5678	4.0847	3.5424	3.5778	4.3308	4.8813	3.6597	3.7036	3.5688	4.0611	4.1291	4.4398	4.0968	4.1377	3.8856	3.7314	3.4729	3.3482	3.7192	3.5946	3.7474	4.28	3.7022	3.739	3.2752	3.1096	3.4386	3.2665	3.2398	3.3326
9.8904	609.322	0.163	0.2383	0.2239	0.2227	0.2317	0.2524	0.2469	0.2459	0.2281	0.2304	0.4761	0.4327	0.422	0.3746	0.5253	0.4224	0.4223	0.5284	0.4505	0.455	0.2429	0.2886	0.2751	0.2637	0.3108	0.2983	0.2942	0.3262	0.2856	0.2884	0.4491	0.4325	0.3903	0.4314	0.4216	0.4336
9.9067	558.315	0.1774	0.1707	0.1483	0.2468	0.1786	0.1483	0.1551	0.1708	0.1745	0.1762	0.2443	0.3214	0.2312	0.3206	0.2049	0.2503	0.3275	0.1804	0.2601	0.2627	0.1952	0.2096	0.17	0.2681	0.1881	0.1758	0.2007	0.1776	0.1971	0.1991	0.2055	0.205	0.1951	0.1935	0.1978	0.2034
9.9198	186.183	0.227	0.2082	0.2145	0.2098	0.1327	0.1607	0.1658	0.1567	0.1844	0.1863	0.1699	0.1872	0.1665	0.1575	0.1675	0.2131	0.1831	0.2443	0.1861	0.188	0.2137	0.2039	0.2035	0.1986	0.1437	0.1757	0.1719	0.1836	0.1859	0.1877	0.1419	0.1502	0.1267	0.157	0.1425	0.1466
9.923	367.209	0.9342	1.1999	0.9858	1.2601	1.1763	1.1037	1.3402	1.0487	1.1311	1.1424	1.664	1.4511	1.3489	1.3274	1.775	1.605	1.8271	1.7979	1.5996	1.6155	1.1232	1.2693	1.0825	1.2899	1.3481	1.2428	1.4781	1.2716	1.2558	1.2683	1.5285	1.6531	1.7467	1.6731	1.6338	1.6807
9.9251	391.168	0.2197	0.215	0.1681	0.2615	0.2063	0.2201	0.2594	0.2328	0.2229	0.2251	0.2348	0.1903	0.208	0.1575	0.273	0.2717	0.1836	0.2317	0.2188	0.221	0.2246	0.2098	0.179	0.2376	0.2266	0.2355	0.2427	0.2383	0.2231	0.2253	0.2645	0.2158	0.2676	0.209	0.2368	0.2436
10.0327	263.163	5.9126	7.7427	6.1549	5.7801	6.2231	9.0775	8.7836	8.2653	7.2425	7.3149	1.1784	1.1089	1.3122	1.4916	1.088	1.2285	0.9017	1.1549	1.183	1.1949	4.747	6.1064	4.9631	4.7443	4.9942	7.1678	6.8625	6.6055	5.751	5.8083	5.3482	5.2853	5.2821	5.6738	5.3434	5.4965
10.033	337.234	7.0135	9.0995	7.0829	8.061	8.6685	12.5379	8.5113	8.3463	8.6651	8.7518	4.1058	3.2131	4.0586	4.6662	4.0791	3.079	3.1181	4.0916	3.8014	3.8395	6.3147	7.6587	6.355	7.2759	7.6168	10.2529	7.2223	7.4381	7.4839	7.5583	6.4808	6.285	6.2925	6.7524	6.3881	6.5712
10.0344	279.226	1.6507	1.9863	1.7892	1.8731	1.0564	1.8471	1.8777	1.4951	1.697	1.7139	0.8123	0.5434	0.6014	0.5579	0.5274	0.5242	0.4494	0.6953	0.5889	0.5948	1.4473	1.6319	1.4983	1.5565	0.936	1.5285	1.5325	1.3225	1.4263	1.4405	1.1599	1.3083	1.1398	1.3913	1.2373	1.2728
10.0362	286.309	0.4366	0.4809	0.5029	0.4996	0.4978	0.4848	0.5498	0.4644	0.4896	0.4945	0.5157	0.5963	0.4656	0.5019	0.7258	0.7254	0.574	0.4787	0.5729	0.5787	0.4588	0.5124	0.496	0.5052	0.564	0.5511	0.5616	0.4798	0.5134	0.5185	0.5231	0.5436	0.5931	0.5508	0.5471	0.5628
10.0383	235.167	0.9059	0.8119	0.771	0.8347	0.9094	0.6495	0.8908	0.738	0.8139	0.822	0.9013	0.9848	0.7103	0.7903	0.7782	0.9899	0.8405	0.8253	0.8526	0.8611	0.9093	0.8596	0.7596	0.8317	0.8893	0.743	0.8871	0.7794	0.8282	0.8364	0.958	0.8389	1.0498	0.9601	0.9422	0.9692
10.0655	453.166	1.0172	1.0866	1.4036	1.3795	1.6272	1.1558	1.4755	1.1228	1.2835	1.2964	3.024	1.7934	1.9802	1.7305	2.6504	2.4205	2.5312	2.2008	2.2914	2.3143	1.5291	1.2705	1.5563	1.4828	1.9151	1.4902	1.7599	1.4338	1.5454	1.5608	2.5157	2.6422	2.9663	3.0763	2.7721	2.8516
10.0674	437.192	12.4805	12.6884	14.7237	11.6584	12.844	13.9263	13.4413	17.7198	13.6853	13.8222	18.6685	11.6216	14.2652	14.0242	17.5988	16.161	18.1921	16.7078	15.9049	16.0639	14.1062	12.4825	14.6823	12.3783	14.261	14.6385	14.7904	17.8971	14.3225	14.4648	16.9327	15.4854	15.01	16.2831	15.7685	16.2204
10.0742	432.237	0.2771	0.3579	0.3275	0.3489	0.2671	0.324	0.2656	0.3344	0.3128	0.3159	0.3226	0.2446	0.2919	0.2769	0.3002	0.2992	0.3843	0.3537	0.3092	0.3123	0.29	0.3311	0.3202	0.334	0.2796	0.321	0.2986	0.3478	0.3136	0.3167	0.3103	0.2945	0.3519	0.279	0.3058	0.3146
10.087	314.282	0.2372	0.2692	0.2632	0.2905	0.2282	0.2631	0.2017	0.2827	0.2545	0.257	0.3335	0.3596	0.2322	0.4294	0.2873	0.3427	0.387	0.3387	0.3388	0.3422	0.2627	0.2934	0.2567	0.3288	0.2468	0.2861	0.251	0.3045	0.2772	0.28	0.3033	0.2315	0.2512	0.2941	0.2673	0.275
10.1143	419.182	0.3118	0.2241	0.2657	0.3351	0.3354	0.3784	0.3101	0.3396	0.3125	0.3157	0.3785	0.3438	0.2895	0.2904	0.4348	0.3618	0.4233	0.3174	0.3549	0.3585	0.3302	0.2554	0.2731	0.3271	0.366	0.378	0.3421	0.3423	0.325	0.3282	0.4289	0.526	0.5176	0.4161	0.4674	0.4808
10.1182	236.113	0.4924	0.5591	0.509	0.5734	0.4684	0.4785	0.4806	0.6072	0.5211	0.5263	0.7694	0.6366	0.644	0.5614	0.6106	0.6917	0.8135	0.754	0.6852	0.692	0.5648	0.5815	0.5457	0.5761	0.512	0.5378	0.5704	0.6609	0.5654	0.5711	0.3319	0.3323	0.319	0.3127	0.3207	0.3299
10.1244	193.157	0.2296	0.1996	0.1699	0.2112	0.1952	0.2281	0.17	0.2365	0.205	0.2071	0.2097	0.2584	0.1784	0.2213	0.1999	0.224	0.2406	0.3179	0.2313	0.2336	0.2257	0.2154	0.1729	0.2159	0.1993	0.2294	0.1897	0.2638	0.2128	0.2149	1.0524	1.1881	1.013	1.0708	1.0703	1.1009
10.1361	339.249	0.6043	0.7518	0.5513	0.6431	0.5689	0.6589	0.5654	0.6573	0.6251	0.6314	0.6661	0.7038	0.9155	0.8812	0.4489	0.7047	0.5347	0.7415	0.6996	0.7065	0.623	0.7434	0.6461	0.7102	0.5465	0.6773	0.5633	0.6958	0.6474	0.6538	0.6229	0.6387	0.5212	0.7485	0.6265	0.6444
10.1367	258.096	0.2966	0.2794	0.3148	0.3243	0.2684	0.2619	0.3547	0.2594	0.2949	0.2979	0.4196	0.4406	0.4001	0.3973	0.4589	0.4819	0.489	0.4412	0.4411	0.4455	0.3292	0.3215	0.3379	0.3462	0.3215	0.3207	0.3926	0.3136	0.3335	0.3368	0.2091	0.1908	0.1495	0.1554	0.1744	0.1794
10.1429	639.332	0.1717	0.1438	0.1854	0.1927	0.1555	0.1828	0.2611	0.2122	0.1882	0.19	0.2535	0.2651	0.3291	0.2481	0.2335	0.2565	0.2882	0.3173	0.2739	0.2767	0.1932	0.1751	0.2226	0.2088	0.1779	0.2035	0.2707	0.2451	0.2109	0.213	0.2076	0.2473	0.2587	0.2569	0.2402	0.2471
10.1528	400.341	19.4877	19.1203	19.8543	22.9071	19.7409	19.1347	19.7803	15.8114	19.4796	19.6744	11.1384	11.4826	16.1547	15.3018	13.6239	10.4399	9.8825	10.1068	12.2663	12.389	17.4777	17.2874	19.0203	21.1968	18.4619	17.1119	17.4572	14.7092	17.7645	17.9412	21.5601	24.7325	21.6641	20.1368	21.8031	22.4279
10.1623	452.321	0.4045	0.4212	0.3949	0.3487	0.3829	0.3881	0.3886	0.4232	0.394	0.398	0.4407	0.4368	0.5625	0.5294	0.5117	0.5661	0.5121	0.6015	0.5201	0.5253	0.4157	0.4272	0.4392	0.3983	0.4218	0.4375	0.4241	0.4806	0.4281	0.4323	1.3909	1.3706	1.3047	1.1774	1.2978	1.335
10.1664	457.276	0.4376	0.4934	0.5004	0.6078	0.4627	0.4205	0.6055	0.5104	0.5048	0.5098	1.1164	1.1214	1.0074	1.1401	1.2137	1.5443	1.2879	1.0898	1.1901	1.202	0.6112	0.6544	0.631	0.7496	0.663	0.7115	0.7858	0.6753	0.6808	0.6876	3.0835	3.0737	2.9663	3.131	3.033	3.1199
10.203	365.12	0.4369	0.4831	0.3776	0.4507	0.3871	0.323	0.383	0.3434	0.3981	0.4021	0.5586	0.5259	0.6449	0.5743	0.6184	0.6868	0.7582	0.5791	0.6183	0.6245	0.4698	0.4963	0.447	0.4867	0.4525	0.4191	0.4826	0.4139	0.456	0.4605	0.489	0.492	0.6152	0.6304	0.5511	0.5669
10.2306	200.2	3.0547	2.404	3.3078	3.0001	2.4919	2.9189	2.179	3.2511	2.8259	2.8542	1.8139	1.9329	1.9475	1.6451	1.6707	2.0545	1.844	2.2913	1.9	1.919	2.7568	2.2971	2.981	2.6846	2.3178	2.7282	2.1158	3.0804	2.6076	2.6335	3.1951	2.853	3.069	2.855	2.9631	3.048
10.253	358.366	2.2631	2.7544	2.5387	2.9571	2.7891	2.6057	3.2278	3.12	2.782	2.8098	3.3743	3.9991	3.3446	2.811	4.5194	3.7031	3.1344	3.3709	3.5321	3.5674	2.5551	3.0825	2.755	2.9494	3.2765	2.9122	3.2369	3.2639	2.9871	3.0167	3.1114	2.8797	3.7452	3.6428	3.3113	3.4062
10.2552	490.291	0.683	0.7212	0.7788	0.8019	0.8679	0.8999	0.6753	0.7938	0.7777	0.7855	0.6941	0.6342	0.6266	0.6189	0.7185	0.7548	0.5474	0.7868	0.6727	0.6794	0.6893	0.7028	0.7443	0.7633	0.8424	0.8721	0.6496	0.8118	0.7555	0.763	0.7199	0.5915	0.7038	0.7032	0.6728	0.6921
10.2596	512.274	0.2694	0.2014	0.2413	0.301	0.2722	0.3135	0.3065	0.2893	0.2743	0.2771	0.2456	0.2423	0.246	0.2198	0.2275	0.2169	0.1903	0.1658	0.2193	0.2215	0.2648	0.2127	0.2437	0.2833	0.2648	0.2921	0.28	0.2641	0.2619	0.2645	0.212	0.2149	0.2376	0.2564	0.2279	0.2345
10.2706	259.186	0.6407	0.5608	0.6707	0.5597	0.5875	0.5735	0.5888	0.5691	0.5939	0.5998	0.4418	0.4622	0.5083	0.5283	0.5796	0.5455	0.5893	0.5878	0.5304	0.5357	0.5937	0.5387	0.6331	0.5573	0.5943	0.5722	0.5949	0.5882	0.5811	0.5869	1.3431	1.105	1.1057	1.2183	1.1811	1.2149
10.2734	407.182	1.0082	0.961	1.031	1.0548	1.0526	1.1543	1.2392	1.0881	1.0737	1.0844	1.1195	1.0432	1.0467	1.0543	1.4767	1.1408	1.3504	1.3978	1.2037	1.2157	1.0414	0.9866	1.0402	1.0652	1.1776	1.1626	1.2802	1.1966	1.1125	1.1235	1.4685	1.415	1.5956	1.5001	1.4799	1.5223
10.2736	251.127	0.9656	0.8167	0.7815	0.8419	0.7557	0.6371	0.7329	0.8357	0.7959	0.8038	0.6001	0.5534	0.6253	0.594	0.8851	0.6082	0.6654	0.6924	0.653	0.6595	0.8782	0.7543	0.746	0.7871	0.8004	0.6362	0.7232	0.819	0.7642	0.7718	1.114	0.9505	1.0075	0.8051	0.9596	0.9871
10.2831	163.04	1.5056	1.5088	1.5955	1.5206	1.4551	1.4173	1.8294	1.5524	1.5481	1.5636	1.8826	1.8336	1.7195	1.5209	1.7819	1.7657	1.8151	1.8102	1.7662	1.7838	1.6084	1.5984	1.6349	1.5359	1.5611	1.5206	1.8444	1.6589	1.6118	1.6278	1.1485	1.1096	1.181	1.2358	1.157	1.1902
10.288	181.049	0.315	0.4258	0.4738	0.3662	0.3972	0.3693	0.4218	0.4177	0.3984	0.4023	0.4887	0.4747	0.4778	0.4578	0.6115	0.5445	0.4418	0.5195	0.502	0.5071	0.3605	0.4403	0.4772	0.3932	0.4583	0.4178	0.4312	0.4549	0.4268	0.431	0.3002	0.2708	0.3251	0.3162	0.3	0.3086
10.2896	646.407	0.3508	0.3563	0.3573	0.3612	0.3714	0.3616	0.3978	0.3449	0.3627	0.3663	0.5278	0.3773	0.4806	0.348	0.4859	0.5077	0.4141	0.3977	0.4424	0.4468	0.3973	0.3634	0.3902	0.3614	0.4065	0.4026	0.406	0.3674	0.3848	0.3887	0.3445	0.3445	0.2973	0.3743	0.3367	0.3464
10.2902	617.398	0.1928	0.1848	0.2114	0.1813	0.1911	0.2567	0.2146	0.1987	0.2039	0.206	0.2484	0.2177	0.2534	0.1854	0.2036	0.2286	0.1448	0.2423	0.2155	0.2177	0.2078	0.194	0.2231	0.1841	0.1972	0.2522	0.199	0.2151	0.208	0.2101	0.1644	0.1762	0.1866	0.2158	0.1839	0.1892
10.2903	314.34	0.5224	0.5812	0.4783	0.6635	0.5121	0.7255	0.5229	0.5083	0.5643	0.5699	0.6829	0.5293	0.5557	0.5495	0.8805	0.744	0.5453	0.6871	0.6468	0.6533	0.5656	0.571	0.5003	0.6411	0.6146	0.7376	0.534	0.5679	0.5883	0.5941	0.5859	0.6261	0.7078	0.751	0.661	0.68
10.2905	317.116	1.7718	1.5441	2.033	1.7701	2.0447	1.7272	2.1001	2.3844	1.9219	1.9411	3.9206	4.521	3.9245	3.6945	4.0632	3.9942	4.2735	4.7359	4.1409	4.1823	2.3234	2.3035	2.5209	2.2785	2.5951	2.3231	2.676	3.0613	2.4935	2.5183	4.3738	4.0523	4.2029	4.1516	4.1532	4.2722
10.291	279.158	9.2619	9.7627	10.733	9.5516	9.7087	9.2577	10.5895	9.4795	9.7931	9.891	11.8873	11.6044	11.2828	11.2326	12.7112	12.5084	11.9952	13.5763	12.0998	12.2208	9.9717	10.2765	10.926	10.0758	10.6275	10.1814	11.0562	10.7919	10.4306	10.5343	13.3294	12.7516	12.3456	12.5793	12.624	12.9857
10.292	579.291	12.6016	13.7028	13.3485	13.3673	13.9428	13.6034	15.9509	16.6729	14.1488	14.2903	20.2404	18.9616	18.2513	17.785	20.3431	21.3634	21.1449	21.4809	19.9463	20.1458	14.5942	15.0992	14.654	14.6275	15.8	15.7218	17.4387	18.3518	15.693	15.8488	15.2582	15.5988	15.6406	15.6957	15.3928	15.8339
10.2921	301.14	30.0236	26.5089	26.7756	27.1132	26.9119	26.1741	29.5911	25.2876	27.2983	27.5712	31.2683	31.2229	29.3507	28.0165	32.8793	32.6499	34.2164	34.3124	31.7396	32.0569	30.4896	27.8317	27.5611	27.6147	28.8522	28.0932	31.073	28.2888	28.5727	28.8566	27.1662	27.2191	28.299	28.3315	27.4764	28.2637
10.2922	205.085	6.0461	6.1012	6.0505	6.5898	6.126	6.028	6.7893	5.9026	6.2042	6.2662	7.3674	7.4238	6.987	7.3923	8.573	7.9834	7.9013	8.7817	7.8012	7.8792	6.4103	6.4657	6.3175	6.8603	6.848	6.5883	7.1423	6.8059	6.6424	6.7084	7.5177	7.1212	7.5011	7.5453	7.3471	7.5576
10.2926	149.022	14.7304	14.7264	14.7163	13.9095	14.4489	15.4009	15.78	14.154	14.7333	14.8806	13.6756	12.9147	12.3197	12.7666	14.1578	13.2198	13.841	14.1234	13.3773	13.5111	14.5384	14.3426	14.1854	13.7572	14.5907	15.0016	15.4464	14.4998	14.4725	14.6163	16.0535	15.3288	15.0601	15.4214	15.3113	15.75
10.2972	400.222	0.748	0.6328	0.8986	0.6046	0.6699	0.6828	0.5471	0.7244	0.6885	0.6954	1.0072	0.4705	0.8225	0.7775	0.8482	0.7131	0.5995	0.6445	0.7354	0.7427	0.8172	0.595	0.8839	0.6547	0.7259	0.6975	0.5661	0.7215	0.7042	0.7112	0.5895	0.7588	0.7145	0.7463	0.6953	0.7152
10.3087	265.177	3.1427	3.6715	3.1694	2.9707	2.6298	4.1616	4.3423	3.8835	3.4964	3.5314	0.6906	0.5612	0.668	0.6891	0.4845	0.5173	0.4562	0.5966	0.5829	0.5888	2.5394	2.9045	2.5537	2.4186	2.1168	3.2744	3.3953	3.1178	2.7794	2.8071	2.8443	2.681	2.9228	2.8453	2.7951	2.8752
10.314	571.358	0.1721	0.1922	0.1767	0.2098	0.2034	0.2144	0.2142	0.2087	0.1989	0.2009	0.3881	0.2691	0.2262	0.3113	0.3468	0.3452	0.27	0.3375	0.3118	0.3149	0.2275	0.2126	0.1901	0.2378	0.2434	0.25	0.2306	0.2477	0.2286	0.2308	0.2712	0.2944	0.2442	0.2724	0.2678	0.2755
10.3171	383.203	1.4503	1.6032	1.2532	1.7343	1.4318	1.5641	1.524	1.3612	1.4903	1.5052	1.9982	1.5683	1.8646	1.7709	2.2867	2.1909	2.0348	1.8233	1.9422	1.9616	1.596	1.6024	1.4139	1.761	1.6734	1.74	1.6699	1.5165	1.6128	1.6288	2.5423	2.6328	2.6665	2.5103	2.5621	2.6355
10.3172	361.223	0.5271	0.523	0.4829	0.4671	0.4907	0.5937	0.6213	0.4982	0.5255	0.5308	0.5832	0.4969	0.5372	0.7767	0.6319	0.658	0.621	0.6588	0.6205	0.6267	0.5439	0.519	0.4991	0.5507	0.5344	0.6162	0.6276	0.5528	0.5524	0.5579	0.9673	0.8198	0.8189	0.727	0.8249	0.8486
10.319	293.208	1.9744	1.9601	2.0517	2.229	1.7253	2.0789	2.3072	2.7105	2.1296	2.1509	1.9501	2.0096	1.8453	1.4359	2.0859	2.0548	1.9399	2.1808	1.9378	1.9572	1.9782	1.9824	2.0099	2.049	1.844	2.094	2.237	2.6392	2.093	2.1138	2.1355	2.3502	2.4311	2.3152	2.2849	2.3504
10.3288	195.172	0.14	0.1458	0.1417	0.1824	0.1388	0.1676	0.149	0.1466	0.1515	0.153	0.281	0.2325	0.2586	0.2796	0.3583	0.355	0.2344	0.2503	0.2812	0.284	0.1763	0.1684	0.1719	0.209	0.1974	0.2171	0.1723	0.1775	0.1851	0.187	0.5888	0.5629	0.5776	0.4839	0.5478	0.5635
10.3293	177.162	0.3849	0.3052	0.3351	0.3919	0.3351	0.3904	0.3492	0.3811	0.3591	0.3627	0.6029	0.4433	0.4	0.5158	0.6231	0.5047	0.543	0.566	0.5249	0.5301	0.4419	0.3416	0.3532	0.4274	0.4143	0.4235	0.4022	0.4392	0.403	0.407	1.2165	0.8914	1.0254	1.068	1.0398	1.0696
10.362	395.239	0.9339	0.9903	0.9959	1.0926	1.0571	1.0866	1.1071	0.9518	1.0269	1.0372	1.4901	1.2511	1.37	1.411	1.5652	1.637	1.4736	1.5897	1.4735	1.4882	1.0791	1.0611	1.0954	1.1847	1.2038	1.2381	1.2119	1.143	1.1455	1.1569	1.2091	1.319	1.312	1.3492	1.2844	1.3212
10.3687	577.298	0.6665	0.7719	0.6168	0.6057	0.5523	0.5105	0.5687	0.538	0.6038	0.6098	1.0858	1.0801	1.425	1.2226	1.0247	0.8608	0.8878	1.1245	1.0889	1.0998	0.7758	0.8536	0.824	0.7691	0.6822	0.6051	0.6559	0.7054	0.7298	0.737	0.5152	0.5013	0.5483	0.5589	0.5256	0.5407
10.3863	239.163	1.2919	1.1559	1.3142	1.1412	1.1067	1.0924	1.023	1.0671	1.1491	1.1605	0.5029	0.4642	0.3669	0.3704	0.3359	0.3942	0.4318	0.523	0.4237	0.4279	1.0992	0.987	1.0816	0.9561	0.9248	0.9254	0.8826	0.951	0.9721	0.9817	0.8919	0.9285	0.8358	0.8829	0.8759	0.901
10.3933	428.372	6.2649	6.0917	6.8833	7.9788	6.2237	8.6731	8.786	5.5224	7.053	7.1235	4.2348	4.4965	5.906	6.7266	4.912	4.8469	4.4783	5.1213	5.0903	5.1412	5.7839	5.7194	6.6713	7.7393	5.9793	7.7855	7.7768	5.5552	6.5961	6.6617	8.4885	7.5174	7.7434	8.2439	7.9183	8.1452
10.3976	371.325	2.1535	1.9362	1.7925	1.7345	1.8824	1.6663	1.9919	1.8236	1.8726	1.8913	2.3726	2.491	2.0823	1.9376	2.0252	2.1482	2.1985	2.2531	2.1886	2.2104	2.2197	2.086	1.8747	1.8036	1.9474	1.8062	2.0649	1.9819	1.9629	1.9824	1.6195	1.8079	1.8223	1.8753	1.7634	1.814
10.4044	514.289	1.4462	1.5324	1.2027	1.0959	1.1462	1.5032	1.1969	1.3783	1.3127	1.3259	1.5117	1.0434	1.1225	1.1499	1.0427	1.2358	1.2681	1.288	1.2078	1.2198	1.47	1.4166	1.1885	1.1206	1.1367	1.4503	1.2273	1.3891	1.2935	1.3063	1.3192	1.0198	1.2491	1.1706	1.1778	1.2115
10.406	305.207	0.2426	0.1827	0.2745	0.2035	0.2458	0.292	0.3105	0.3007	0.2565	0.2591	0.4015	0.3421	0.2332	0.2893	0.3968	0.2772	0.3562	0.307	0.3254	0.3287	0.284	0.2239	0.2655	0.2274	0.2884	0.2912	0.3253	0.3099	0.2754	0.2781	0.3116	0.3383	0.3258	0.329	0.3229	0.3322
10.4164	295.224	3.3811	3.4479	3.6422	4.2301	3.6595	5.1071	4.1519	3.3504	3.8713	3.91	2.3241	2.6436	2.4696	2.3863	1.6069	2.2772	1.8945	2.572	2.2718	2.2945	3.1313	3.2621	3.3645	3.8022	3.1858	4.4373	3.6184	3.2298	3.4885	3.5232	3.7215	3.6665	3.9596	3.7622	3.7397	3.8468
10.419	359.985	1.3669	1.3851	1.1305	1.1662	1.2484	1.0845	1.1473	1.1343	1.2079	1.22	1.0667	1.0421	1.0919	1.0252	1.1583	1.2288	1.1157	1.2	1.1161	1.1272	1.298	1.3054	1.1265	1.1419	1.2439	1.1324	1.1509	1.1799	1.1914	1.2033	1.083	0.9657	1.0587	1.0539	1.0299	1.0594
10.4315	293.208	0.925	0.9315	0.9823	0.7704	0.8147	0.9672	0.7891	0.7537	0.8667	0.8754	1.654	1.8812	0.9886	1.1886	1.1205	1.2828	1.2689	1.4053	1.3487	1.3622	1.1138	1.176	0.9889	0.8848	0.9057	1.0576	0.9196	0.9436	0.9934	1.0033	1.0274	1.0275	1.1402	0.9975	1.0377	1.0674
10.4402	411.266	0.2562	0.2261	0.253	0.2562	0.1261	0.1981	0.2265	0.2264	0.2211	0.2233	0.302	0.2355	0.2317	0.3606	0.36	0.2385	0.2889	0.3127	0.2912	0.2941	0.2691	0.2296	0.2489	0.2854	0.1882	0.2104	0.2447	0.2547	0.24	0.2424	0.2566	0.2504	0.2482	0.306	0.2626	0.2702
10.4534	343.132	0.4614	0.475	0.481	0.4116	0.4674	0.4485	0.4576	0.4689	0.4589	0.4635	0.4037	0.3873	0.3795	0.3779	0.4005	0.4404	0.4716	0.4305	0.4114	0.4155	0.4492	0.4552	0.4578	0.4071	0.4572	0.451	0.4658	0.4705	0.4495	0.4539	1.1786	1.1555	1.1241	1.2455	1.1642	1.1975
10.4561	204.138	0.8354	0.9605	0.7837	0.5454	0.855	0.7347	0.7065	0.8928	0.7893	0.7971	0.4908	0.4932	0.5295	0.5314	0.4962	0.6469	0.6553	0.6041	0.5559	0.5615	0.7526	0.8473	0.7235	0.5473	0.7754	0.7198	0.7006	0.8393	0.7347	0.742	1.7872	1.7896	1.8138	1.9778	1.8237	1.8759
10.4778	395.248	0.1734	0.1752	0.18	0.1732	0.2068	0.2917	0.2134	0.1695	0.1979	0.1999	0.2419	0.2556	0.2343	0.174	0.253	0.2372	0.3592	0.2622	0.2522	0.2547	0.1916	0.1964	0.1946	0.1751	0.2218	0.2808	0.2528	0.1981	0.2127	0.2148	0.2442	0.2054	0.2062	0.2863	0.2332	0.2399
10.4853	249.183	0.8639	0.8417	1.0948	0.6585	0.6509	0.9485	0.9874	1.2221	0.9085	0.9176	0.5629	0.3813	0.3584	0.4268	0.5149	0.3507	0.4186	0.385	0.4248	0.4291	0.7923	0.7297	0.9144	0.606	0.6256	0.8057	0.8524	1.0329	0.7913	0.7991	0.9383	0.8492	0.7214	0.8225	0.8245	0.8481
10.4987	149.091	0.4983	0.5904	0.567	0.6761	0.5436	0.6749	0.6437	0.5145	0.5886	0.5944	0.4776	0.4053	0.3986	0.5015	0.6789	0.4444	0.5055	0.5603	0.4965	0.5015	0.4956	0.5466	0.5273	0.6383	0.5866	0.623	0.615	0.5394	0.5686	0.5742	1.1846	0.9938	1.0815	0.9736	1.0478	1.0778
10.4993	419.182	0.8095	0.8049	0.9833	1.0325	0.9033	1.0712	1.0917	0.8914	0.9485	0.958	0.946	1.0339	0.7505	1.052	1.3265	0.9982	1.2415	0.9458	1.0368	1.0472	0.8481	0.8667	0.9295	1.0478	1.0258	1.0635	1.1411	0.928	0.9761	0.9858	1.4129	1.4664	1.5976	1.3139	1.4332	1.4743
10.5223	307.223	0.2201	0.2619	0.1797	0.2981	0.1879	0.2423	0.2691	0.2736	0.2416	0.244	0.3153	0.2666	0.2449	0.1868	0.3468	0.3496	0.3713	0.3555	0.3046	0.3076	0.2453	0.2644	0.1971	0.2727	0.2316	0.2721	0.2979	0.3019	0.2589	0.2614	0.2214	0.2781	0.2475	0.2467	0.2459	0.253
10.5256	591.313	0.4353	0.3178	0.317	0.2827	0.2872	0.3628	0.3274	0.2544	0.3231	0.3263	0.5575	0.5219	0.5597	0.4946	0.4452	0.4195	0.5304	0.5603	0.5111	0.5162	0.4684	0.3709	0.3799	0.3396	0.3322	0.381	0.3825	0.3411	0.3724	0.3761	0.2661	0.3282	0.2872	0.2923	0.2905	0.2988
10.5609	542.323	17.8456	19.3788	18.6264	17.6292	17.1787	17.221	16.4352	15.5394	17.4818	17.6566	19.3059	15.2255	12.1105	12.0354	15.4851	15.0109	17.5546	17.1601	15.486	15.6409	18.3045	18.427	17.075	16.3791	17.0003	16.8329	16.8885	16.3533	17.0745	17.2442	15.9774	14.6086	15.4801	15.0412	15.1241	15.5574
10.5849	380.255	15.8918	12.3419	18.3343	12.455	15.5903	15.4096	13.4978	14.5744	14.7619	14.9095	20.1734	13.3202	22.3329	22.4213	20.1193	17.438	16.827	15.6611	18.5367	18.722	17.0533	12.6506	19.4366	15.121	16.9904	16.0843	14.4848	15.224	15.7982	15.9551	15.447	16.8194	16.5895	17.6616	16.4631	16.9348
10.5858	500.271	0.2516	0.229	0.2575	0.2655	0.3065	0.3805	0.3315	0.3086	0.2913	0.2943	0.2192	0.2532	0.2635	0.2337	0.1869	0.2423	0.1479	0.2806	0.2284	0.2307	0.2447	0.2363	0.2603	0.26	0.2803	0.3491	0.288	0.309	0.2771	0.2798	0.2853	0.2746	0.3232	0.3408	0.3029	0.3116
10.5865	368.257	0.7537	0.7333	0.55	0.9301	0.7442	1.0381	0.6967	0.8241	0.7838	0.7916	0.8963	0.7745	0.8857	0.7658	0.91	0.9402	0.9884	0.9256	0.8858	0.8947	0.7935	0.7474	0.6376	0.8975	0.7981	1.0237	0.7782	0.8713	0.8139	0.822	0.7374	0.6503	0.5523	0.6645	0.6446	0.6631
10.5871	518.323	21.7702	23.5309	20.8504	17.7714	19.571	19.3617	16.0268	14.1309	19.1267	19.3179	20.2106	17.2473	16.553	17.0113	17.8565	17.1457	18.8078	17.9621	17.8493	18.0278	21.4863	22.0619	19.8705	17.7553	19.4231	18.994	16.8998	15.4899	18.9101	19.0981	16.9872	17.0967	17.8913	16.2829	16.8939	17.378
10.5904	317.212	0.2683	0.3515	0.3392	0.2371	0.2257	0.2175	0.3038	0.2542	0.2737	0.3586	4.4367	3.7995	3.9123	4.4895	5.8849	5.3526	6.4253	5.0101	4.5264	3.8763	1.3223	1.2239	1.2432	1.3238	1.6863	1.5297	1.8685	1.509	1.3502	1.2496	17.1975	12.4768	2.9539	3.0378	3.1217	8.2228
10.5923	512.334	10.0971	7.83	9.9271	6.0762	9.9009	5.7898	7.3152	8.456	8.174	8.2558	6.4306	7.5488	4.8681	4.9254	7.521	8.1558	8.2164	8.6488	7.0394	7.1098	9.2222	7.7981	8.6997	5.8435	9.4366	6.4525	7.6197	8.718	7.9327	8.0115	4.3102	4.4022	4.7844	4.3315	4.4125	4.5389
10.5978	439.269	0.1775	0.2353	0.2104	0.1966	0.2536	0.2677	0.2348	0.2427	0.2273	0.2296	0.2985	0.2644	0.3087	0.1641	0.2711	0.2973	0.3021	0.3935	0.2875	0.2903	0.209	0.2438	0.2363	0.1903	0.2619	0.278	0.2544	0.2884	0.2438	0.2462	0.2725	0.222	0.2623	0.3077	0.2635	0.271
10.6074	482.323	21.4917	20.4637	21.7983	13.2173	19.8796	12.9054	13.1361	17.6926	17.5731	17.7488	19.7011	15.423	14.3342	13.3949	16.8149	15.5496	18.0104	17.2034	16.3039	16.467	21.1481	19.2932	20.0235	13.3948	19.3886	13.7116	14.5136	18.0065	17.35	17.5225	15.2506	15.2494	16.0576	15.1165	15.2643	15.7017
10.608	199.168	1.4376	1.2552	1.136	1.2598	1.2513	1.9219	1.2746	1.4765	1.3766	1.3904	1.0478	1.3273	1.0079	1.413	1.425	1.7158	1.5121	1.3873	1.3545	1.3681	1.3464	1.2797	1.1094	1.3115	1.3148	1.8889	1.3482	1.49	1.3787	1.3924	8.1865	8.4135	8.357	8.2671	8.223	8.4586
10.609	111.116	0.7134	0.5238	0.6236	0.6327	0.4939	0.8076	0.5941	0.6146	0.6255	0.6317	0.5315	0.597	0.4179	0.5919	0.7163	0.8475	0.661	0.5788	0.6177	0.6239	0.6711	0.5449	0.5748	0.6286	0.5586	0.826	0.6172	0.6206	0.627	0.6332	4.0412	4.0441	4.1077	3.7536	3.9468	4.0599
10.6092	530.322	0.6052	0.6013	0.6369	0.5065	0.6592	0.7161	0.7105	0.7161	0.644	0.6504	0.6545	0.617	0.4346	0.4657	0.5882	0.5855	0.4835	0.471	0.5375	0.5429	0.6207	0.6083	0.589	0.5012	0.6508	0.6901	0.6598	0.6697	0.6206	0.6268	0.5279	0.6703	0.6727	0.5573	0.601	0.6182
10.6129	293.208	0.5644	0.775	0.6046	0.8209	0.7018	0.717	0.7826	0.7487	0.7144	0.7215	1.0039	0.8749	1.0368	0.9605	0.8375	0.9942	0.8729	0.9682	0.9436	0.953	0.6782	0.8041	0.7168	0.8647	0.7473	0.795	0.8136	0.825	0.7763	0.784	0.608	0.6347	0.5942	0.5278	0.5853	0.602
10.6214	601.285	0.2571	0.3025	0.2541	0.4326	0.2868	0.3004	0.3091	0.3408	0.3104	0.3135	0.3522	0.3074	0.3832	0.3319	0.3414	0.4306	0.3025	0.4105	0.3575	0.361	0.2824	0.3052	0.288	0.4112	0.3052	0.3367	0.3106	0.3676	0.324	0.3273	0.2783	0.2656	0.2153	0.2817	0.2576	0.265
10.622	494.323	66.1765	62.9055	65.3786	45.1478	55.8364	64.7746	41.952	45.0278	55.8999	56.4589	67.6603	58.9865	49.6876	49.0715	57.4257	55.9382	58.7661	55.0403	56.572	57.1377	66.8854	62.2305	61.7464	46.5998	57.0832	63.1814	46.6694	48.7818	56.3807	56.941	47.3979	49.235	49.5442	46.7758	47.7558	49.1242
10.6646	1039.67	25.4395	29.9186	26.1236	20.5676	23.8711	18.8388	20.6659	25.3958	23.8526	24.0911	39.7197	30.7006	20.4576	20.9802	29.9538	26.2896	34.423	31.0355	29.195	29.487	29.1741	30.2656	24.8247	20.8785	25.7955	20.9317	24.3862	27.5111	25.3357	25.5874	20.7224	20.8806	20.8112	21.7694	20.8354	21.4325
10.6725	620.354	4.4239	5.1006	4.9872	4.8463	6.567	6.4422	6.2964	7.7478	5.8014	5.8594	8.0409	8.1123	6.0535	7.6689	6.5003	6.835	9.6183	7.3518	7.5226	7.5979	5.3596	5.8866	5.2817	5.6145	6.6483	6.6081	7.2081	7.8375	6.2688	6.331	5.0394	4.8997	4.9971	5.3165	5.0125	5.1562
10.6778	813.983	0.8266	1.0878	0.9691	0.9529	1.4507	1.1035	0.8702	1.2306	1.0614	1.072	1.3803	0.9586	1.6296	1.5156	1.6125	1.5674	1.4384	1.4594	1.4452	1.4597	0.9706	1.0606	1.1408	1.1059	1.5141	1.2331	1.024	1.3214	1.1643	1.1759	0.8745	1.0645	1.0906	0.7912	0.9456	0.9727
10.6823	558.295	0.6528	0.7923	0.5672	0.8403	0.7919	0.66	0.7181	0.6093	0.704	0.711	1.218	0.6873	1.477	1.1776	1.0751	1.306	1.1293	1.4656	1.192	1.2039	0.7988	0.7697	0.7998	0.9347	0.8767	0.8315	0.8303	0.8493	0.8313	0.8395	1.2666	1.5173	1.5376	1.1198	1.3467	1.3853
10.6834	1085.65	3.1704	3.8276	3.6649	3.8734	3.9673	3.7244	3.6291	3.2013	3.6323	3.6686	2.7509	2.794	3.4078	3.3182	3.6856	3.6854	3.1233	3.6464	3.3015	3.3345	3.0805	3.5858	3.6185	3.7706	3.9543	3.7525	3.5371	3.3982	3.5689	3.6043	3.2514	3.1461	3.4738	2.9777	3.1801	3.2713
10.6862	542.321	12.4331	14.3357	12.7411	14.0358	16.7661	14.4212	12.7543	11.6336	13.6401	13.7765	17.6342	13.4502	17.8863	17.1325	17.6346	15.1838	14.3973	15.8316	16.1438	16.3053	13.8093	14.1838	14.1047	14.9658	17.2412	14.7629	13.3036	13.0264	14.3489	14.4914	12.8463	13.6278	15.5886	12.4592	13.4942	13.8808
10.6891	1061.65	3.3788	3.3984	3.5011	3.4696	3.3348	2.4982	2.3235	2.8038	3.0885	3.1194	4.1543	3.6896	3.8274	3.4742	3.5638	4.0979	4.0421	3.9382	3.8484	3.8869	3.5917	3.4889	3.6012	3.5055	3.4438	2.9318	2.7856	3.1717	3.2978	3.3306	2.8611	2.9169	2.7867	2.5415	2.7488	2.8275
10.6911	566.321	9.464	9.9872	10.0673	11.185	11.88	11.7082	12.2806	9.5756	10.7685	10.8762	10.7507	10.6119	11.5231	12.0926	13.1472	12.582	13.6779	12.1377	12.0654	12.186	9.8367	10.1949	10.4858	11.5283	12.3845	12.0506	12.7624	10.4875	11.1562	11.2671	9.8726	10.2675	11.8249	9.561	10.2777	10.5722
10.6927	582.295	0.459	0.4556	0.4134	0.5109	0.5902	0.6253	0.6492	0.6987	0.5503	0.5558	0.7731	0.682	0.8603	1.0064	0.9916	0.9086	1.0295	0.9784	0.9037	0.9128	0.5406	0.515	0.5283	0.6424	0.7024	0.704	0.7528	0.7896	0.6427	0.6491	0.9086	1.0904	1.0761	0.9229	0.9895	1.0179
10.6953	1109.65	1.8931	2.2286	1.8335	2.3581	2.2203	2.2551	2.4089	1.7646	2.1203	2.1415	1.8669	2.1615	2.183	2.6346	2.4195	2.5937	2.7321	2.6882	2.4099	2.434	1.896	2.2228	1.931	2.4522	2.3049	2.3645	2.5159	2.0512	2.2053	2.2272	1.9789	1.8659	2.096	1.9835	1.9613	2.0175
10.6962	1047.64	0.9726	1.0375	1.0801	0.7941	0.9548	1.0513	0.9681	0.7154	0.9467	0.9562	0.8828	1.0076	0.6975	0.7332	0.8758	1.1088	0.9235	0.9744	0.9005	0.9095	0.9548	1.0351	0.9889	0.7865	0.9488	1.0767	0.9666	0.8013	0.9403	0.9496	0.6806	0.7816	0.8926	0.7741	0.7744	0.7966
10.6999	590.32	12.6049	10.4987	13.0225	12.2735	15.5591	16.8717	18.9762	14.5586	14.2957	14.4386	13.1475	13.8986	12.5777	14.6543	16.3254	14.2845	14.8302	14.8282	14.3183	14.4615	12.8056	11.4097	12.9759	13.0033	15.9898	16.3839	18.1122	14.9933	14.3809	14.5238	14.8028	14.4846	15.5262	12.7751	14.2532	14.6616
10.7	228.231	0.5864	0.7407	0.5478	0.6519	0.7458	0.8959	0.6082	0.8979	0.7093	0.7164	0.6591	0.7174	0.6091	0.6965	0.6731	0.7238	0.7959	0.8906	0.7207	0.7279	0.6077	0.7385	0.566	0.6698	0.7383	0.8611	0.6623	0.9184	0.7161	0.7233	1.0653	0.9575	0.9581	1.1252	1.0163	1.0454
10.7022	504.305	26.1953	29.4168	25.8773	26.8983	30.06	27.7103	28.2194	27.8522	27.7787	28.0565	25.0726	22.2727	26.5659	26.3287	29.0278	28.3783	27.5252	30.0316	26.9004	27.1694	26.0441	27.76	26.1819	27.022	30.2451	28.1635	28.3303	29.1206	27.7112	27.9866	28.8376	27.2762	29.7107	25.3832	27.5239	28.3126
10.7037	482.323	84.7682	85.1507	81.4468	61.5749	73.3174	80.1966	59.7652	60.8455	73.3832	74.117	74.462	65.9068	66.0174	62.4761	68.1094	70.5643	70.3885	72.4354	68.795	69.4829	82.5937	80.7174	77.9618	62.4205	73.0761	78.5577	63.0851	65.409	72.6315	73.3534	68.9279	68.1227	67.8147	65.1672	66.833	68.7481
10.7061	568.338	47.332	49.9975	48.6287	48.9849	55.3257	49.1009	50.3647	55.5874	50.6652	51.1719	49.9329	47.3293	44.215	44.4973	48.3651	46.5134	41.3655	49.5294	46.4685	46.9332	48.2278	49.5738	47.7597	48.3304	54.3632	48.9419	48.5829	55.3869	49.8861	50.382	48.0931	48.7141	46.8291	44.368	46.5311	47.8644
10.7072	530.322	0.2811	0.2337	0.2751	0.1891	0.3088	0.2217	0.2476	0.2489	0.2508	0.2533	0.4015	0.2764	0.2879	0.2524	0.2878	0.2449	0.3136	0.4003	0.3081	0.3112	0.3129	0.2457	0.2797	0.2071	0.308	0.2299	0.267	0.2949	0.2666	0.2693	0.3193	0.2757	0.2117	0.2444	0.2601	0.2676
10.7095	1071.64	2.4571	2.2587	2.4499	2.4997	2.5365	2.1271	1.9904	1.3916	2.2139	2.236	1.9055	1.2311	1.262	1.2817	1.9666	1.6566	1.9115	1.7011	1.6145	1.6307	2.3302	2.0105	2.1623	2.2141	2.4278	2.0288	1.9906	1.5076	2.0747	2.0953	1.4541	1.8756	1.6989	1.8477	1.7019	1.7506
10.7142	1063.67	60.1033	63.664	60.5898	58.9713	65.7252	63.7793	65.8247	64.1529	62.8513	63.4798	58.7186	53.5779	52.6948	55.2356	59.1564	60.248	60.7499	58.822	57.4004	57.9744	60.0572	61.4356	58.9021	58.6084	65.0196	63.5293	65.2018	64.3574	61.823	62.4375	53.0684	54.4132	53.8646	52.9849	53.0469	54.5669
10.7153	1135.67	8.0693	7.9019	8.6729	9.0857	8.9652	8.8015	8.8287	7.7818	8.5134	8.5985	8.9305	6.7285	5.5512	5.1914	7.0131	5.8496	5.8686	6.4354	6.446	6.5105	8.3275	7.6451	7.9284	8.1835	8.597	8.1383	8.1637	7.6229	8.0381	8.1181	6.361	8.7176	6.568	8.592	7.4841	7.6985
10.7168	1111.67	25.7749	21.9989	23.4146	26.9824	22.8365	23.6634	26.7299	25.6567	24.6322	24.8785	20.5568	22.3454	17.3075	17.0003	18.8444	19.1757	17.3964	20.9688	19.1994	19.3914	24.5874	22.1964	21.9907	24.7068	22.1511	22.76	24.6217	25.0675	23.3959	23.6285	24.3052	19.6162	24.8267	21.0147	22.2163	22.8529
10.7169	1025.65	6.5494	6.9582	5.3685	4.4257	4.9207	6.6812	4.48	4.4341	5.4772	5.532	5.2757	4.1998	3.7342	3.3677	3.9636	4.6863	4.7264	4.1657	4.2649	4.3076	6.2608	6.2965	4.9829	4.2002	4.7481	6.2405	4.5886	4.4745	5.2012	5.253	3.3674	3.8648	3.7178	4.4414	3.8094	3.9185
10.7175	544.34	117.503	116.919	109.165	119.12	114.993	116.321	124.853	117.885	117.095	118.266	104.01	88.0704	91.3467	88.0642	104.897	101.394	102.089	97.3693	97.155	98.1265	114.689	110.219	105.217	112.392	114.118	113.7	120.32	115.446	112.706	113.826	106.049	101.237	105.795	100.172	102.28	105.211
10.7369	87.7717	0.1656	0.1874	0.1817	0.1304	0.1454	0.119	0.2186	0.136	0.1605	0.1621	0.1197	0.1113	0.1379	0.1154	0.1183	0.1426	0.1177	0.1357	0.1248	0.1261	0.1548	0.1691	0.1716	0.1279	0.1406	0.1262	0.1951	0.1393	0.1524	0.1539	0.093	0.1265	0.1233	0.1383	0.1191	0.1225
10.7378	87.8946	0.1564	0.1011	0.1785	0.1504	0.1525	0.1648	0.1361	0.192	0.154	0.1555	0.1141	0.1107	0.1131	0.1164	0.1697	0.1337	0.1436	0.1435	0.1306	0.1319	0.1465	0.104	0.1629	0.1432	0.1592	0.1585	0.1394	0.1841	0.1489	0.1504	0.1179	0.1374	0.1042	0.1212	0.119	0.1224
10.7394	87.493	0.1319	0.1584	0.1659	0.1733	0.2373	0.1926	0.2326	0.1685	0.1826	0.1844	0.175	0.1517	0.088	0.1323	0.1666	0.1349	0.1288	0.1852	0.1453	0.1468	0.1435	0.1575	0.1471	0.1646	0.2227	0.1798	0.2085	0.1771	0.1742	0.1759	0.1835	0.1387	0.1632	0.1813	0.165	0.1697
10.7402	87.694	0.271	0.2232	0.2448	0.2321	0.2421	0.2442	0.2501	0.293	0.2501	0.2526	0.2066	0.2331	0.1591	0.1623	0.2679	0.1998	0.1741	0.1911	0.1993	0.2012	0.2561	0.2268	0.2244	0.2166	0.2524	0.2354	0.2333	0.2736	0.2386	0.241	0.218	0.1998	0.2145	0.2444	0.217	0.2232
10.7421	83.1216	0.201	0.1888	0.1706	0.1899	0.181	0.1757	0.258	0.2062	0.1964	0.1984	0.1677	0.1818	0.1687	0.1113	0.1651	0.1614	0.2341	0.1738	0.1705	0.1722	0.1936	0.188	0.171	0.1718	0.1796	0.1738	0.2545	0.2029	0.1909	0.1928	0.1446	0.1849	0.1745	0.1595	0.1642	0.1689
10.7442	997.621	0.6426	0.5623	0.5816	0.3386	0.5769	0.4028	0.5097	0.6325	0.5309	0.5362	0.5556	0.4373	0.3902	0.5049	0.3834	0.4417	0.3018	0.4968	0.439	0.4434	0.6239	0.5335	0.5362	0.3844	0.5357	0.4168	0.4619	0.6127	0.5106	0.5157	0.3847	0.3876	0.3633	0.3872	0.3769	0.3877
10.7445	82.9219	0.2904	0.3684	0.3095	0.2285	0.2665	0.2449	0.2574	0.3269	0.2866	0.2894	0.3142	0.2727	0.2629	0.2182	0.3712	0.321	0.2727	0.311	0.293	0.2959	0.2979	0.3461	0.2993	0.2282	0.2975	0.2668	0.2639	0.3309	0.2898	0.2927	0.1902	0.2326	0.2955	0.2684	0.2442	0.2512
10.7472	82.96	0.1914	0.1416	0.2138	0.1781	0.2368	0.2939	0.1825	0.217	0.2069	0.209	0.2025	0.1672	0.1489	0.1594	0.1654	0.2276	0.2268	0.2385	0.192	0.194	0.1952	0.1488	0.1985	0.1751	0.222	0.28	0.1957	0.2281	0.2043	0.2063	0.1594	0.1874	0.243	0.1704	0.1881	0.1935
10.7483	82.7244	0.2341	0.3055	0.2166	0.2423	0.2386	0.2295	0.1865	0.2388	0.2365	0.2389	0.2098	0.2227	0.2366	0.1869	0.2309	0.2372	0.247	0.2228	0.2242	0.2265	0.2291	0.2861	0.2227	0.2306	0.2402	0.2338	0.2038	0.2406	0.2347	0.237	0.1627	0.1544	0.1836	0.2137	0.1768	0.1819
10.7512	78.2575	0.2858	0.3706	0.308	0.3409	0.342	0.3918	0.2424	0.3012	0.3228	0.3261	0.3989	0.3429	0.2725	0.3218	0.3565	0.3431	0.383	0.4297	0.3561	0.3596	0.3158	0.3655	0.3006	0.3394	0.3509	0.3834	0.2807	0.3425	0.333	0.3363	0.3168	0.3408	0.2882	0.3245	0.3144	0.3234
10.7531	78.4375	0.252	0.2018	0.1584	0.2077	0.1748	0.1546	0.1727	0.1583	0.185	0.1869	0.2445	0.2341	0.1572	0.1668	0.247	0.1941	0.2936	0.2751	0.2266	0.2288	0.2514	0.211	0.1589	0.1993	0.196	0.1663	0.2053	0.1929	0.1966	0.1985	0.1337	0.1295	0.1756	0.1856	0.1545	0.159
10.7549	78.3285	0.1803	0.2957	0.1793	0.2227	0.1956	0.2183	0.1863	0.2455	0.2155	0.2176	0.2953	0.2351	0.191	0.2424	0.288	0.2191	0.276	0.2355	0.2478	0.2503	0.2103	0.2819	0.1832	0.23	0.2223	0.2207	0.2111	0.249	0.2248	0.2271	0.166	0.1915	0.1839	0.1563	0.1727	0.1776
10.758	520.339	143.742	154.487	139.135	137.167	148.17	134.48	140.537	138.854	142.072	143.492	148.772	137.86	130.904	135.636	156.55	149.504	151.391	152.835	145.431	146.886	145.738	151.061	137.759	138.148	152.551	139.685	144.74	145.995	143.711	145.139	124.252	127.135	125.326	118.31	122.518	126.029
10.7586	1039.67	76.8107	90.0551	78.8913	74.6361	83.5198	71.4969	75.3718	82.3761	79.1447	79.9362	89.9493	83.1203	74.2061	76.5475	93.7067	87.3861	91.1739	91.292	85.9227	86.782	80.5165	88.7543	78.1066	75.8699	87.3957	76.2798	80.172	86.7759	81.2982	82.1061	65.5789	68.2325	66.7419	63.9469	65.4638	67.3396
10.7785	1015.67	44.0953	49.8018	42.0948	42.0848	44.3345	45.9688	38.8161	37.2587	43.0569	43.4874	45.3047	44.1188	39.4352	37.1864	45.1273	44.8724	46.0649	46.0497	43.5199	43.9551	44.6234	48.6159	41.6358	41.2566	45.2037	46.1582	41.0614	40.4978	43.4134	43.8448	41.4122	37.686	40.6698	37.5533	38.937	40.0527
10.7789	184.072	0.3086	0.31	0.2803	0.353	0.3135	0.2771	0.2444	0.2597	0.2933	0.2963	0.291	0.2466	0.266	0.2062	0.293	0.2169	0.2862	0.2448	0.2563	0.2589	0.3057	0.2955	0.2781	0.3191	0.3129	0.2646	0.2576	0.2623	0.2856	0.2884	0.2196	0.2666	0.243	0.2388	0.2396	0.2464
10.7793	478.302	0.9267	0.8603	0.8917	0.837	1.145	0.9692	1.0917	0.9403	0.9577	0.9673	0.7913	0.9754	1.1757	1.1653	0.8747	0.8634	0.8036	0.91	0.9449	0.9544	0.8972	0.8937	0.9679	0.9291	1.0926	0.9521	1.0293	0.9559	0.9598	0.9694	0.8174	0.8853	0.9015	0.683	0.8136	0.8369
10.7829	1037.65	1.7626	2.1561	1.757	2.1664	1.9948	1.9793	1.9889	2.1111	1.9895	2.0094	2.2241	2.1751	2.068	2.4147	2.4675	2.6413	2.4825	2.4777	2.3689	2.3926	1.888	2.1717	1.8444	2.2514	2.1464	2.1684	2.1351	2.2601	2.0965	2.1173	1.883	1.7685	1.9582	1.8463	1.8454	1.8982
10.7836	1013.65	3.7078	3.8784	3.4034	4.0984	3.963	4.0866	4.1899	3.9513	3.9099	3.9489	3.0555	3.2937	3.7814	4.4242	4.4264	4.2518	3.9499	4.1922	3.9219	3.9611	3.5618	3.7502	3.516	4.2225	4.1418	4.1704	4.1714	4.1133	3.9346	3.9737	3.3118	3.8199	3.9017	3.7621	3.6619	3.7668
10.7861	894.686	0.1587	0.2015	0.1924	0.1978	0.2054	0.2001	0.1828	0.1966	0.1919	0.1938	0.2249	0.2646	0.1735	0.2304	0.2007	0.2519	0.2007	0.1809	0.216	0.2181	0.1762	0.2184	0.1886	0.2081	0.2073	0.2154	0.1892	0.1974	0.1991	0.201	0.2053	0.1836	0.1952	0.1645	0.1853	0.1906
10.7898	777.985	0.3908	0.4325	0.4749	0.5515	0.5244	0.4962	0.6176	0.4921	0.4975	0.5025	0.6625	0.5616	0.7751	0.7332	0.6831	0.7859	0.8426	0.7958	0.73	0.7373	0.4614	0.4673	0.5531	0.6033	0.5731	0.5752	0.6813	0.5841	0.559	0.5646	0.4789	0.4266	0.5537	0.4827	0.4806	0.4944
10.7915	743.432	0.2626	0.3003	0.2783	0.4287	0.3659	0.2958	0.2715	0.2894	0.3116	0.3147	0.5502	0.5189	0.4775	0.4123	0.583	0.4624	0.5541	0.496	0.5068	0.5119	0.3366	0.357	0.33	0.4288	0.4273	0.3413	0.3464	0.3509	0.3626	0.3662	0.7036	0.585	0.5723	0.5394	0.5941	0.6111
10.7916	789.985	0.2587	0.3558	0.3442	0.4831	0.3376	0.4266	0.4735	0.3922	0.384	0.3878	0.4238	0.4212	0.3566	0.4222	0.5099	0.4763	0.4257	0.5297	0.4457	0.4501	0.3017	0.3741	0.3491	0.4724	0.387	0.4436	0.4661	0.4381	0.4017	0.4057	0.3643	0.2888	0.2336	0.333	0.3019	0.3105
10.7919	699.405	0.3536	0.3123	0.3919	0.4592	0.4308	0.3775	0.4445	0.3559	0.3907	0.3946	0.7414	0.5925	0.6004	0.4818	0.6537	0.5594	0.6201	0.589	0.6048	0.6108	0.4533	0.3846	0.4465	0.4696	0.4947	0.4278	0.4938	0.426	0.447	0.4514	0.739	0.6415	0.711	0.7365	0.6999	0.72
10.792	655.379	0.4948	0.4132	0.4596	0.4621	0.5527	0.4808	0.5029	0.509	0.4844	0.4892	0.6852	0.6962	0.6775	0.6516	0.8589	0.6627	0.7857	0.7893	0.7259	0.7331	0.5454	0.4867	0.5169	0.515	0.6398	0.5321	0.5802	0.5953	0.5481	0.5536	0.9267	0.8643	0.8924	0.858	0.8765	0.9016
10.7925	399.357	0.2538	0.3278	0.2573	0.2759	0.2214	0.3698	0.3819	0.3905	0.3098	0.3129	0.3057	0.3622	0.3875	0.3475	0.4271	0.3796	0.3807	0.3821	0.3716	0.3753	0.2682	0.3381	0.2915	0.2969	0.2777	0.3761	0.3855	0.3981	0.3271	0.3304	0.301	0.267	0.334	0.2914	0.2954	0.3038
10.7946	419.276	1.4471	1.3778	1.7245	1.877	1.4976	1.9434	1.9774	1.4091	1.6567	1.6733	1.4634	1.7996	2.0138	2.2781	2.4167	2.2595	2.1823	2.1054	2.0649	2.0855	1.4585	1.4912	1.8063	1.9981	1.7567	2.0439	2.0498	1.6271	1.7691	1.7867	2.5017	2.4261	2.7265	2.4689	2.5055	2.5773
10.7973	611.354	0.4061	0.4575	0.4532	0.4983	0.5152	0.5853	0.5028	0.552	0.4963	0.5013	0.9941	0.7997	0.763	0.7474	0.8451	0.7801	0.9106	0.8165	0.8321	0.8404	0.5566	0.5462	0.5337	0.5668	0.6079	0.641	0.612	0.6352	0.5839	0.5897	0.9898	0.9879	0.9316	0.9406	0.9529	0.9802
10.7989	463.302	3.627	3.5373	3.5832	4.531	3.8478	4.4181	4.2094	3.9112	3.9581	3.9977	4.2506	4.1339	4.6032	4.8427	5.4318	5.1594	5.2515	4.863	4.817	4.8652	3.8028	3.7056	3.8589	4.6558	4.3134	4.6523	4.5182	4.2588	4.1972	4.2389	5.2866	5.2307	5.8093	5.6678	5.4436	5.5996
10.799	441.32	0.6761	0.6567	0.7282	0.8344	0.7737	0.8775	0.7449	0.7393	0.7539	0.7614	0.8056	0.7608	0.7757	0.825	1.0373	0.8298	0.8494	0.7843	0.8335	0.8418	0.7122	0.6863	0.7439	0.8403	0.8532	0.8743	0.7792	0.7696	0.7782	0.7859	1.082	1.0535	1.0647	1.0621	1.0549	1.0851
10.7995	458.346	1.2733	1.2268	1.1527	0.9627	1.119	1.2715	1.1849	1.2727	1.183	1.1948	0.9299	1.0089	1.0168	1.0734	1.1768	1.0396	1.1263	1.1363	1.0635	1.0741	1.193	1.1779	1.1242	1.0006	1.1507	1.2253	1.182	1.2687	1.1593	1.1709	1.493	1.508	1.3968	1.4546	1.4485	1.49
10.8007	502.372	1.7527	1.9053	1.8635	2.1105	1.7786	2.0675	1.8257	1.5949	1.8623	1.881	1.4437	1.4137	1.5866	1.5468	1.6375	1.4831	1.6167	1.5339	1.5328	1.5481	1.6835	1.7907	1.803	1.9879	1.7689	1.9395	1.791	1.6188	1.7894	1.8072	2.3931	2.1453	2.1053	1.9862	2.1359	2.1971
10.8011	722.503	1.1022	1.2061	1.1554	1.3479	1.1951	1.1878	1.1753	1.3559	1.2157	1.2279	0.9204	0.9621	1.1142	0.9957	1.217	0.943	0.9256	1.1397	1.0272	1.0375	1.0619	1.1505	1.1508	1.2716	1.2187	1.1375	1.1236	1.333	1.1748	1.1865	1.2752	1.0927	1.0996	1.0798	1.1255	1.1577
10.8016	529.364	0.9182	0.9671	0.9694	1.2346	1.1949	1.0386	1.1937	1.2728	1.0987	1.1096	1.2069	1.1858	1.2628	1.2771	1.5062	1.1282	1.2232	1.3053	1.2619	1.2746	0.9957	1.0272	1.0484	1.2578	1.293	1.0721	1.2134	1.3132	1.146	1.1574	1.4406	1.3678	1.5938	1.467	1.4526	1.4943
10.8019	573.398	0.9727	1.0891	1.0785	1.1868	1.1663	1.1977	1.0961	0.9672	1.0943	1.1052	1.4948	1.2661	1.1436	1.272	1.5082	1.2619	1.4266	1.2077	1.3226	1.3358	1.1095	1.1392	1.1004	1.2204	1.2718	1.2263	1.1916	1.0545	1.1581	1.1696	1.5053	1.4018	1.4524	1.2939	1.3992	1.4393
10.8021	727.458	2.242	2.2391	2.4614	2.8144	2.619	2.7416	2.6137	2.585	2.5395	2.5649	2.8691	2.5737	2.8195	2.8442	3.212	2.7273	2.8059	2.8489	2.8376	2.866	2.4117	2.3348	2.5643	2.8501	2.811	2.7659	2.6894	2.7189	2.629	2.6551	2.7517	2.7969	2.8342	2.8483	2.7797	2.8593
10.8022	507.328	4.8274	4.8278	4.9122	5.2668	5.1046	6.0831	5.6074	5.8144	5.3055	5.3585	5.3151	5.8229	5.7672	6.3562	7.2362	6.1887	6.5737	6.0454	6.1632	6.2248	4.9749	5.1032	5.1529	5.5973	5.7301	6.1721	5.9111	6.0204	5.5518	5.6069	7.2164	6.706	6.984	6.9065	6.8837	7.0809
10.8023	678.477	1.6642	1.6758	1.7674	1.8263	2.0054	1.5273	1.6939	2.2	1.795	1.813	1.5077	1.3362	1.4597	1.5047	1.8574	1.3927	1.4719	1.4468	1.4971	1.5121	1.6331	1.5984	1.6986	1.7626	1.9974	1.5085	1.6546	2.0573	1.7297	1.7469	1.9284	1.5832	1.9033	1.5736	1.7297	1.7792
10.8029	590.424	2.3347	2.5725	2.2743	2.3086	2.3901	2.8925	2.4599	2.7709	2.5004	2.5254	2.1008	2.1971	2.1157	2.0546	2.5874	2.2969	2.3079	2.1756	2.2295	2.2518	2.2874	2.4906	2.2457	2.2669	2.4768	2.7701	2.4462	2.6839	2.4459	2.4702	2.5677	2.327	2.4997	2.4617	2.4394	2.5093
10.803	551.354	4.3993	4.998	4.5574	5.048	5.2038	6.0006	5.3162	5.7637	5.1609	5.2125	5.9048	5.6426	5.9721	6.1446	7.298	6.4906	6.311	5.992	6.2195	6.2817	4.8017	5.1858	4.9377	5.3781	5.8211	6.1868	5.6242	5.9677	5.4572	5.5114	6.4928	6.4249	6.4025	6.4183	6.3703	6.5528
10.8033	639.406	4.334	4.5603	4.5473	5.3212	5.1179	5.2185	5.0268	5.5662	4.9615	5.0111	5.9438	5.0714	5.2806	5.3342	6.7029	5.5878	5.7283	5.4642	5.6392	5.6955	4.7624	4.7122	4.7554	5.3777	5.6028	5.366	5.257	5.6786	5.1604	5.2117	5.4647	5.4708	5.6389	5.5973	5.4875	5.6447
10.8034	595.379	4.5862	4.894	4.8442	5.3813	5.1979	5.7753	5.4993	5.7918	5.2463	5.2987	6.3189	5.8649	6.0223	6.1233	7.421	6.4506	6.6078	6.3813	6.3988	6.4628	5.0469	5.1636	5.1662	5.6243	5.8483	6.0065	5.8382	6.0913	5.5668	5.6221	6.6233	6.1011	6.3322	6.2134	6.2543	6.4335
10.804	634.45	2.2733	2.3558	2.2926	2.3094	2.5019	2.7904	2.3912	2.591	2.4382	2.4626	1.7415	1.7778	1.9589	2.0847	2.3497	2.0112	1.9364	2.1544	2.0018	2.0218	2.1505	2.2216	2.2199	2.2752	2.5002	2.6201	2.2996	2.5412	2.3415	2.3647	2.457	2.0354	2.3341	2.3127	2.262	2.3268
10.8045	661.449	0.9068	0.8391	0.8144	0.9801	0.9373	0.9856	0.9153	0.7952	0.8967	0.9057	0.8964	0.8207	0.857	1.0242	1.1214	0.831	1.035	0.8246	0.9263	0.9356	0.9088	0.8386	0.8293	1.0011	0.9988	0.9562	0.9552	0.8228	0.9092	0.9182	1.0192	1.0875	1.2403	0.9955	1.0748	1.1056
10.8046	617.419	0.8648	1.0395	1.0266	1.057	1.1037	1.1702	1.056	1.1993	1.0646	1.0753	1.2487	1.102	1.2829	1.2333	1.4199	1.1914	1.3593	1.1603	1.2497	1.2622	0.9661	1.0605	1.0965	1.1125	1.2017	1.1875	1.1441	1.219	1.1173	1.1284	1.3111	1.4262	1.2855	1.2873	1.3142	1.3519
10.813	558.294	0.2378	0.2356	0.2757	0.2515	0.2324	0.3216	0.3713	0.3202	0.2808	0.2836	0.46	0.4857	0.3691	0.3689	0.4985	0.5731	0.5048	0.6535	0.4892	0.4941	0.2951	0.2999	0.3007	0.284	0.3044	0.389	0.4091	0.4157	0.335	0.3383	0.4226	0.5145	0.4623	0.4931	0.4684	0.4818
10.8169	1087.67	1.0819	1.3242	1.1256	1.0245	1.2703	0.9495	0.9631	1.1567	1.112	1.1231	1.3658	0.9945	0.8899	0.7356	0.9047	0.8622	0.971	1.018	0.9677	0.9774	1.1591	1.2476	1.0718	0.9611	1.1952	0.9369	0.9749	1.1492	1.0817	1.0924	0.9203	0.9627	1.0128	0.9043	0.9405	0.9675
10.8193	570.354	25.8965	25.9645	25.517	27.465	26.8424	24.4571	24.5558	22.8976	25.4495	25.704	33.054	26.8878	21.9942	21.7792	27.618	24.9423	25.2315	27.2225	26.0912	26.3521	27.8347	26.3275	24.7563	26.2898	27.4448	24.8304	24.9787	24.6053	25.7532	26.0092	25.264	25.2457	26.6184	25.5687	25.4175	26.1458
10.8199	608.311	0.351	0.3742	0.3933	0.4501	0.5021	0.4743	0.4878	0.3745	0.4259	0.4302	0.8196	0.7215	0.6558	0.6108	0.7432	0.9198	0.7018	0.7631	0.742	0.7494	0.4711	0.4638	0.4616	0.4956	0.5717	0.5928	0.5474	0.4859	0.5082	0.5132	0.8096	0.8444	0.7989	0.9373	0.8391	0.8631
10.8201	542.32	6.5728	7.376	7.5094	7.0502	6.1014	6.9317	7.0904	7.3058	6.9922	7.0621	8.4075	7.9785	7.1055	6.3384	7.8066	8.2567	8.3126	8.2645	7.8088	7.8869	7.0693	7.565	7.4453	6.9392	6.632	7.3404	7.4745	7.7401	7.2375	7.3094	5.5357	6.0489	6.1677	6.3729	5.971	6.1421
10.8203	544.338	8.7537	9.3733	4.7768	9.2287	9.1445	9.2558	6.9889	8.6939	8.277	8.3597	7.886	7.335	7.6572	7.4015	7.3804	9.0955	6.7158	8.3679	7.7299	7.8072	8.5788	8.9055	5.5283	8.8551	8.8274	9.3094	6.9905	8.8257	8.1847	8.2661	7.2046	7.7747	7.1399	8.1792	7.4989	7.7137
10.8219	592.336	9.809	9.7833	10.015	10.735	10.053	11.4124	10.9945	11.6384	10.5551	10.6606	12.5529	11.5952	11.0694	10.3771	12.7488	12.3195	10.715	12.6674	11.7557	11.8732	10.5514	10.2897	10.3318	10.7511	10.898	11.7603	11.0354	12.1995	10.9173	11.0257	10.2057	11.3367	11.7914	11.8439	11.1815	11.5019
10.825	382.273	0.451	0.5652	0.5718	0.5278	0.6435	0.7596	0.7508	0.7662	0.6295	0.6358	0.6712	0.6688	0.7559	0.8589	0.654	0.7149	0.5828	0.7511	0.7072	0.7143	0.5089	0.5942	0.6212	0.6175	0.6559	0.7559	0.7156	0.7814	0.6526	0.6591	0.5938	0.5493	0.5551	0.7216	0.5989	0.6161
10.8252	301.14	1.6145	1.737	1.8561	2.2185	1.7708	1.9748	1.8833	1.7028	1.8447	1.8632	1.3012	1.5835	1.8325	2.0265	1.8008	2.0925	1.8507	2.0091	1.8121	1.8302	1.5435	1.7069	1.8595	2.1917	1.8051	2.025	1.8942	1.8258	1.8467	1.8651	1.5243	1.9824	1.7413	1.8455	1.7556	1.8059
10.8407	523.357	4.086	5.4011	5.1016	3.437	4.4542	4.8499	3.7368	2.7928	4.2324	4.2747	4.197	3.6399	3.4139	3.5175	3.5553	3.6672	4.2157	3.7759	3.7478	3.7853	4.1347	4.9834	4.7012	3.4919	4.2895	4.5977	3.8971	3.1207	4.1335	4.1745	3.8538	3.7581	4.0845	3.8794	3.855	3.9655
10.8635	534.301	0.5331	0.666	0.7444	0.723	0.5933	0.6231	0.7291	0.6599	0.659	0.6656	0.971	0.9584	0.9963	1.1934	1.0394	1.2436	1.1632	1.2243	1.0987	1.1097	0.6464	0.7432	0.8118	0.8502	0.7171	0.7877	0.8473	0.8246	0.7738	0.7815	1.26	1.189	1.7434	1.3389	1.369	1.4082
10.868	104.162	0.1775	0.1854	0.1871	0.1485	0.1396	0.1498	0.1635	0.1771	0.1661	0.1677	0.1436	0.1367	0.1029	0.1565	0.1695	0.1348	0.1549	0.145	0.143	0.1444	0.1698	0.174	0.1668	0.152	0.1494	0.1475	0.163	0.1731	0.1612	0.1628	0.0885	0.1301	0.1061	0.1253	0.1114	0.1146
10.8731	991.672	131.181	131.153	136.614	136.179	131.49	134.166	138.721	140.1	134.951	136.3	118.94	115.843	118.766	118.607	128.185	130.162	126.961	124.701	122.771	123.999	128.752	127.943	132.797	133.06	132.612	134.514	137.137	139.56	132.622	133.94	119.32	118.054	121.425	119.426	118.361	121.752
10.8749	60.3857	0.2842	0.2432	0.3167	0.3557	0.3135	0.2678	0.3594	0.2256	0.2958	0.2987	0.2647	0.287	0.3031	0.3548	0.3556	0.4167	0.2999	0.436	0.3397	0.3431	0.2807	0.2555	0.3149	0.359	0.329	0.3085	0.3479	0.2865	0.3085	0.3116	0.2602	0.28	0.2678	0.2808	0.2695	0.2772
10.8774	765.985	0.6781	0.8391	0.7987	0.9693	0.7782	0.8616	0.868	0.618	0.8014	0.8094	0.8817	0.8652	1.0467	1.3154	1.2263	1.2361	1.2925	1.0704	1.1168	1.128	0.7329	0.8499	0.8654	1.0672	0.9053	0.9659	0.9851	0.7522	0.8856	0.8944	0.7644	0.8971	0.769	0.803	0.8003	0.8232
10.8793	518.321	18.3703	17.1674	17.3092	18.7962	17.2354	17.6913	19.1388	15.9665	17.7094	17.8865	18.1853	17.5271	18.0457	19.2755	19.1474	19.5614	20.0572	19.5186	18.9148	19.1039	18.4164	17.3441	17.5826	19.1064	17.9863	18.3489	19.5684	17.2981	18.1126	18.2926	18.9964	19.0476	18.3923	18.4929	18.545	19.0764
10.8806	454.292	0.7379	0.5916	0.8947	0.8362	0.8128	0.7285	0.8252	0.8306	0.7822	0.79	0.7065	0.5697	0.6082	0.5781	0.6233	0.601	0.552	0.5867	0.6032	0.6092	0.7337	0.589	0.8269	0.7787	0.7762	0.7034	0.7639	0.7873	0.7413	0.7487	0.6319	0.718	0.6217	0.7406	0.6713	0.6905
10.8817	496.34	160.987	175.912	168.982	166.19	161.106	165.295	164.011	164.196	165.835	167.493	152.352	148.306	149.91	145.766	163.067	166.121	163.413	158.08	155.877	157.436	159.62	169.821	165.02	162.644	164.027	167.192	165.532	166.695	164.24	165.873	151.308	154.579	149.107	155.516	151.101	155.431
10.8827	1013.65	5.3286	5.3188	5.6771	5.9862	5.7465	5.8189	6.7313	6.239	5.8558	5.9144	6.0293	5.5342	6.4749	6.5038	6.4508	6.3944	6.5573	6.2858	6.2788	6.3416	5.5325	5.3998	5.9072	6.1781	6.0141	6.0251	6.7556	6.4073	5.9953	6.0549	6.1464	6.3039	5.9532	6.1261	6.0711	6.245
10.8878	1017.69	23.5365	22.407	23.7087	20.806	24.0625	19.4526	18.8661	24.4047	22.1555	22.3771	20.7459	17.1249	16.9438	15.762	18.8519	19.1048	19.8987	18.9549	18.4234	18.6076	22.9507	21.1853	22.1201	19.7278	23.0817	19.5624	19.322	23.5842	21.3353	21.5474	19.4001	18.9548	22.1983	19.4132	19.7917	20.3588
10.8934	494.563	0.2274	0.207	0.1934	0.3165	0.2378	0.2137	0.2223	0.2384	0.2321	0.2344	0.1596	0.2427	0.3427	0.2098	0.2241	0.3014	0.2704	0.2713	0.2528	0.2553	0.2114	0.217	0.2321	0.2925	0.2378	0.2383	0.2368	0.253	0.2386	0.241	0.4598	0.3472	0.3431	0.3456	0.3702	0.3808
10.8948	1084.13	0.4711	0.5544	0.5742	0.7113	0.7038	0.6916	0.629	0.7465	0.6352	0.6416	0.549	0.6611	0.6751	0.8989	0.7344	0.5899	0.8216	0.8985	0.7286	0.7358	0.4932	0.5841	0.6026	0.7663	0.7222	0.6727	0.6846	0.8051	0.6624	0.6689	0.6307	0.7272	0.5704	0.7054	0.6518	0.6705
10.8977	1154.62	6.1301	8.2967	7.803	7.9489	8.6895	6.9594	8.6057	8.4993	7.8666	7.9452	8.8774	8.1427	8.4376	7.9185	8.8462	9.5876	10.0421	8.754	8.8258	8.914	6.8548	8.2993	8.0027	8.0206	8.8602	7.7009	9.0599	8.7786	8.1528	8.2338	8.2197	8.333	8.3215	8.3813	8.2307	8.4666
10.8987	1084.64	0.8361	0.5092	0.7586	0.8484	0.6697	0.8207	0.6645	0.5231	0.7038	0.7108	0.6581	0.7501	0.7809	0.6717	0.902	0.9312	1.048	0.9225	0.8331	0.8414	0.7954	0.5726	0.7681	0.8118	0.7396	0.8573	0.7691	0.641	0.7404	0.7477	0.7538	0.8381	0.6625	0.8105	0.7586	0.7803
10.8992	653.414	0.1176	0.1323	0.1237	0.1895	0.1698	0.1953	0.1335	0.1955	0.1572	0.1587	0.1751	0.1794	0.19	0.2249	0.2621	0.1478	0.2621	0.226	0.2084	0.2105	0.1327	0.1449	0.1411	0.2004	0.1961	0.1852	0.1677	0.2084	0.171	0.1727	0.202	0.193	0.2131	0.1625	0.1907	0.1962
10.9012	1178.62	0.1585	0.2906	0.2313	0.2409	0.2697	0.2084	0.2535	0.2517	0.2381	0.2405	0.3554	0.2697	0.2282	0.1777	0.2855	0.2564	0.3643	0.2599	0.2746	0.2774	0.209	0.2868	0.2317	0.2272	0.2778	0.2228	0.2844	0.2601	0.2486	0.2511	0.2241	0.2338	0.1723	0.2007	0.2056	0.2115
10.9013	1035.69	0.8337	0.6638	0.8525	0.7594	0.6682	0.529	0.8021	0.8657	0.7468	0.7543	0.648	0.7632	0.5873	0.5839	0.7793	0.5144	0.7477	0.8777	0.6877	0.6946	0.791	0.6922	0.7898	0.7222	0.7068	0.5307	0.7964	0.8905	0.736	0.7433	0.4961	0.5112	0.4957	0.6141	0.524	0.539
10.9016	675.26	0.2528	0.2743	0.305	0.3056	0.3139	0.3793	0.4398	0.4005	0.3339	0.3372	0.7732	0.616	0.6507	0.5399	0.4885	0.7926	0.8601	0.6252	0.6683	0.675	0.3855	0.362	0.3938	0.3684	0.3636	0.4886	0.5515	0.4695	0.4203	0.4245	0.8885	0.6595	0.6388	0.7195	0.7193	0.7399
10.9024	937.439	0.3345	0.1896	0.2851	0.3214	0.2017	0.3365	0.3272	0.2222	0.2773	0.28	0.2246	0.2563	0.3401	0.3457	0.3577	0.2056	0.3607	0.3269	0.3022	0.3052	0.3084	0.2074	0.3004	0.3308	0.2449	0.3065	0.3391	0.2552	0.2851	0.288	0.2718	0.253	0.2588	0.2882	0.2653	0.2729
10.9037	565.363	0.2312	0.1347	0.1505	0.2142	0.2097	0.2607	0.2168	0.1863	0.2005	0.2025	0.1929	0.2521	0.2287	0.3343	0.2759	0.2082	0.2428	0.208	0.2429	0.2453	0.2227	0.165	0.171	0.247	0.2299	0.25	0.2256	0.1967	0.2123	0.2144	0.2728	0.2157	0.2249	0.2363	0.2351	0.2418
10.9046	573.374	0.3104	0.2198	0.3068	0.2252	0.2373	0.2798	0.2594	0.232	0.2588	0.2614	0.4287	0.3403	0.2372	0.3052	0.3	0.3406	0.3228	0.4157	0.3363	0.3397	0.3418	0.2513	0.2908	0.2479	0.257	0.2982	0.2782	0.286	0.2799	0.2826	0.3497	0.3226	0.3115	0.3898	0.34	0.3497
10.9049	654.331	1.7722	2.9911	2.4398	2.591	2.4565	2.8421	2.899	1.6614	2.4566	2.4812	2.2171	2.1252	2.0158	1.7505	2.0897	2.4542	2.5546	1.9694	2.1471	2.1685	1.8935	2.7874	2.3451	2.4026	2.3989	2.7721	2.8407	1.7838	2.392	2.4158	2.914	2.512	2.6213	2.4547	2.5992	2.6737
10.9064	659.286	6.6488	8.2089	8.866	9.8865	8.6895	10.9051	11.055	8.613	9.1091	9.2002	10.6441	10.2507	10.3742	10.3686	11.34	10.6815	12.3382	10.5733	10.8213	10.9295	7.6913	8.7655	9.2916	10.1083	9.5023	10.9593	11.4952	9.3429	9.5926	9.6879	10.9972	10.381	10.3837	10.6312	10.4923	10.7929
10.9182	1123.16	0.1955	0.1605	0.2233	0.2478	0.1998	0.2018	0.2728	0.258	0.2199	0.2221	0.3556	0.3145	0.3306	0.2649	0.3437	0.2928	0.3226	0.3448	0.3212	0.3244	0.2369	0.2002	0.2515	0.2546	0.2399	0.2271	0.2883	0.2872	0.2468	0.2492	0.3493	0.3159	0.2296	0.3228	0.3014	0.31
10.9264	781.524	0.2013	0.2115	0.2363	0.3061	0.2685	0.3099	0.3083	0.1894	0.2539	0.2565	0.208	0.2759	0.2454	0.3953	0.2428	0.2592	0.2719	0.2373	0.267	0.2696	0.204	0.2288	0.2398	0.3319	0.2659	0.3001	0.3022	0.2067	0.2586	0.2612	0.2413	0.208	0.2208	0.2353	0.2241	0.2305
10.93	1043.7	84.2364	90.9572	85.6492	65.8031	77.2057	82.1346	64.2297	61.328	76.443	77.2074	85.6417	76.2841	67.6314	64.284	79.0633	72.5052	79.7901	76.7612	75.2451	75.9976	85.0167	87.707	81.5318	66.0738	78.8421	80.5162	68.8546	66.9124	76.5653	77.3263	72.1186	70.3069	69.7231	71.4735	70.1965	72.2079
10.9304	737.5	0.2903	0.3417	0.3522	0.3057	0.3279	0.3409	0.437	0.3523	0.3435	0.3469	0.2985	0.3889	0.4145	0.5945	0.357	0.3678	0.3709	0.3441	0.392	0.3959	0.2938	0.3553	0.3697	0.3824	0.3403	0.3512	0.4246	0.359	0.3577	0.3612	0.3327	0.2882	0.3127	0.3566	0.3193	0.3285
10.9373	644.492	0.1587	0.2505	0.2071	0.233	0.1575	0.2475	0.2419	0.1751	0.2089	0.211	0.1669	0.1297	0.1707	0.2351	0.1848	0.2306	0.1747	0.2093	0.1877	0.1896	0.1616	0.2213	0.199	0.2359	0.1669	0.2457	0.2272	0.1885	0.2047	0.2068	0.2416	0.2048	0.2499	0.2397	0.2317	0.2383
10.9378	649.448	0.556	0.7644	0.7811	0.7157	0.6662	0.7931	0.783	0.6397	0.7124	0.7195	0.676	0.7066	0.6957	1.1342	0.8667	0.7541	0.7357	0.6639	0.7791	0.7869	0.5891	0.7536	0.7635	0.8296	0.7278	0.7912	0.7789	0.662	0.7332	0.7405	0.7386	0.6714	0.6614	0.654	0.6745	0.6939
10.9383	605.422	0.7446	0.9621	0.9088	0.9738	0.8416	1.0161	0.9923	0.8586	0.9122	0.9214	0.6974	0.9189	0.9745	1.4243	1.0468	0.9837	0.9093	1.0575	1.0016	1.0116	0.7364	0.956	0.93	1.0984	0.9071	1.0182	0.9813	0.9323	0.9399	0.9492	0.9167	0.8867	0.8516	0.8978	0.8793	0.9045
10.939	79.4698	0.1328	0.1284	0.134	0.1514	0.1437	0.1566	0.1488	0.134	0.1412	0.1426	0.2212	0.2008	0.194	0.1284	0.154	0.2224	0.1956	0.1598	0.1845	0.1864	0.1558	0.1473	0.1498	0.147	0.1485	0.175	0.1623	0.1441	0.1529	0.1545	0.1473	0.1579	0.1887	0.1602	0.1619	0.1665
10.9395	556.441	0.311	0.3884	0.4069	0.2828	0.3468	0.3637	0.3973	0.4281	0.3656	0.3693	0.2044	0.2722	0.2457	0.4133	0.2755	0.2937	0.2975	0.3026	0.2881	0.291	0.2857	0.361	0.3682	0.3189	0.3336	0.3496	0.3759	0.4059	0.3481	0.3515	0.3728	0.3152	0.3146	0.3826	0.3428	0.3527
10.9397	495.389	0.2349	0.3256	0.2571	0.3412	0.2923	0.3253	0.2905	0.2823	0.2937	0.2966	0.2545	0.2951	0.2745	0.3901	0.2967	0.3618	0.2616	0.235	0.2962	0.2991	0.241	0.3195	0.2628	0.3571	0.2978	0.3379	0.2861	0.2769	0.2959	0.2989	0.3506	0.3078	0.3219	0.2994	0.3167	0.3258
10.9409	539.413	0.1638	0.2487	0.2357	0.2653	0.1814	0.2011	0.2346	0.2218	0.2191	0.2212	0.2377	0.2456	0.1821	0.2774	0.2053	0.2606	0.324	0.2525	0.2482	0.2506	0.1833	0.2492	0.2234	0.271	0.1903	0.2183	0.2598	0.2354	0.2276	0.2299	0.1985	0.2915	0.2536	0.2205	0.2386	0.2455
10.9426	385.291	0.6226	0.7619	0.6044	0.8593	0.7007	0.9073	0.9416	0.6742	0.759	0.7666	0.6123	0.7973	0.9092	0.9742	0.864	0.812	0.8147	0.8047	0.8236	0.8318	0.6231	0.7746	0.6844	0.8972	0.7533	0.8922	0.9188	0.7253	0.7795	0.7873	0.8572	0.8426	0.798	0.9015	0.8413	0.8654
10.9428	424.36	0.259	0.3257	0.2261	0.3239	0.2478	0.3297	0.2064	0.35	0.2836	0.2864	0.2023	0.1788	0.2192	0.2879	0.2182	0.2618	0.2495	0.2399	0.2322	0.2345	0.246	0.2902	0.2255	0.318	0.2439	0.3157	0.2195	0.3298	0.2722	0.2749	0.3126	0.3049	0.3195	0.3852	0.3272	0.3366
10.9437	468.386	0.3772	0.4466	0.3637	0.4414	0.358	0.3152	0.3861	0.408	0.387	0.3909	0.313	0.3317	0.3035	0.426	0.3648	0.4064	0.3837	0.2831	0.3515	0.355	0.3629	0.4198	0.3503	0.4419	0.3651	0.3417	0.3894	0.3854	0.3802	0.384	0.4325	0.4392	0.4445	0.4361	0.4337	0.4461
10.9464	451.359	0.2698	0.3509	0.2698	0.3404	0.3157	0.3819	0.3879	0.3591	0.3344	0.3378	0.2969	0.3823	0.3566	0.3961	0.3431	0.4453	0.3301	0.3318	0.3603	0.3639	0.278	0.3606	0.2931	0.358	0.3275	0.402	0.3771	0.3609	0.3428	0.3462	0.3455	0.3018	0.323	0.2736	0.3079	0.3167
10.9465	805.008	0.7916	0.9631	0.8086	1.0976	1.09	1.1284	1.2766	1.0629	1.0274	1.0376	1.3764	1.3312	1.3469	1.3741	1.4576	1.6155	1.5697	1.4732	1.4431	1.4575	0.9433	1.0609	0.9486	1.1791	1.201	1.2642	1.3644	1.1972	1.1382	1.1495	1.0817	1.0365	1.0147	1.1767	1.0666	1.0972
10.9519	429.318	1.0256	1.1433	1.0766	1.488	1.1482	1.3664	1.4785	1.0743	1.2251	1.2374	1.0923	1.1312	1.3975	1.5268	1.339	1.5756	1.3429	1.2907	1.337	1.3504	1.0476	1.146	1.1631	1.5128	1.2146	1.4337	1.459	1.158	1.2602	1.2727	1.2987	1.2567	1.3188	1.3053	1.2819	1.3187
10.9529	560.322	0.4951	0.528	0.6228	0.7737	0.6264	0.7902	0.8723	0.6712	0.6725	0.6792	1.3667	1.1206	1.2453	1.2912	1.0721	1.1941	1.5002	1.1749	1.2456	1.2581	0.7177	0.6803	0.7831	0.9134	0.7506	0.9013	1.0414	0.8202	0.8211	0.8292	1.3378	1.0531	1.1972	1.1793	1.1799	1.2137
10.954	473.344	1.2583	1.5983	1.4083	1.7268	1.4984	1.4423	1.8146	1.673	1.5525	1.568	1.4935	1.7514	1.6019	1.9511	1.7145	1.9425	1.7305	1.6718	1.7322	1.7495	1.324	1.6449	1.4643	1.8013	1.5765	1.5846	1.8117	1.7145	1.6065	1.6225	1.4311	1.4969	1.5165	1.6546	1.5095	1.5528
10.9552	792	0.4725	0.4631	0.4104	0.6831	0.5013	0.6422	0.7292	0.5497	0.5564	0.562	0.6889	0.5294	0.6471	0.6801	0.6632	0.5618	0.6442	0.5876	0.6253	0.6315	0.5295	0.4822	0.4722	0.6892	0.5505	0.6282	0.715	0.5734	0.5769	0.5827	0.4996	0.4033	0.4244	0.5089	0.4545	0.4675
10.9559	346.275	0.2002	0.17	0.1719	0.248	0.191	0.2591	0.1955	0.1773	0.2016	0.2036	0.2107	0.2609	0.2157	0.2626	0.2727	0.312	0.2268	0.2778	0.2549	0.2574	0.2039	0.1938	0.1838	0.2542	0.2149	0.2752	0.2055	0.2081	0.2162	0.2184	0.2222	0.2283	0.1879	0.2122	0.2105	0.2166
10.9665	1093.72	1.9783	1.7503	2.1049	1.4556	1.6971	1.4177	1.3332	1.6793	1.6771	1.6938	2.4524	2.4283	1.3356	1.3119	1.844	1.9235	1.8166	1.9636	1.8845	1.9033	2.108	1.9302	1.9213	1.4335	1.7604	1.5612	1.4701	1.7959	1.7388	1.7561	1.7168	1.6651	2.0144	1.7583	1.7708	1.8215
10.9674	341.266	0.2581	0.2312	0.277	0.3808	0.2799	0.3902	0.3885	0.2638	0.3087	0.3118	0.3062	0.2588	0.3758	0.4414	0.334	0.4301	0.4624	0.3403	0.3686	0.3723	0.2716	0.2393	0.3033	0.4001	0.298	0.4044	0.4113	0.2905	0.3256	0.3288	0.325	0.3126	0.2849	0.4078	0.3292	0.3387
10.9681	572.37	5.3029	5.2753	5.89	5.0612	5.4899	5.387	5.4014	5.3044	5.389	5.4429	7.8147	7.5978	5.2391	5.1151	6.6222	6.4952	6.8923	6.9805	6.5946	6.6606	5.964	5.8881	5.7554	5.1256	5.8638	5.7247	5.8368	5.877	5.7237	5.7806	6.1146	6.3956	6.0584	6.0343	6.0892	6.2637
10.9745	594.351	1.9244	1.9426	2.0812	2.2816	2.3425	2.4449	2.5831	2.0518	2.2065	2.2286	3.3996	2.9699	2.413	2.3363	2.8069	2.6019	3.0642	2.8255	2.8022	2.8302	2.3066	2.2117	2.1755	2.3184	2.4972	2.5099	2.7322	2.3062	2.3694	2.3929	2.5405	2.3493	2.3567	2.2466	2.3495	2.4169
10.9773	299.257	0.1776	0.1474	0.1767	0.21	0.1314	0.2324	0.2129	0.2174	0.1882	0.1901	0.2176	0.1903	0.1696	0.25	0.2278	0.2326	0.2442	0.2107	0.2179	0.22	0.1886	0.159	0.1758	0.2223	0.1582	0.2348	0.2231	0.2211	0.1968	0.1987	0.294	0.2323	0.2614	0.2711	0.2621	0.2696
10.9787	443.332	0.3805	0.3841	0.4267	0.3379	0.3718	0.235	0.4273	0.4244	0.3735	0.3772	0.4149	0.3903	0.4152	0.6845	0.5744	0.6265	0.4593	0.5459	0.5139	0.519	0.3911	0.3876	0.426	0.4297	0.4295	0.3373	0.4398	0.4669	0.411	0.4151	0.3707	0.3815	0.4256	0.4362	0.3995	0.4109
10.9826	590.597	0.1865	0.3014	0.3298	0.35	0.372	0.3873	0.3736	0.392	0.3366	0.3399	0.2678	0.2987	0.3382	0.3571	0.3156	0.3996	0.3863	0.3534	0.3396	0.343	0.208	0.3022	0.3336	0.3553	0.3631	0.3944	0.3807	0.3917	0.3392	0.3426	0.245	0.3154	0.2664	0.2908	0.2766	0.2845
10.9828	487.356	0.3806	0.3923	0.3259	0.288	0.3066	0.2709	0.3684	0.3426	0.3344	0.3378	0.3608	0.4502	0.3661	0.6202	0.3984	0.4482	0.4223	0.4785	0.4431	0.4475	0.3775	0.4089	0.3377	0.3756	0.3348	0.3189	0.3859	0.3868	0.3637	0.3674	0.2872	0.3883	0.3291	0.3276	0.3297	0.3392
10.9854	688.415	0.2067	0.2241	0.1426	0.1575	0.1957	0.2469	0.2711	0.2288	0.2092	0.2113	0.2097	0.1765	0.2167	0.2436	0.2594	0.2649	0.2617	0.2549	0.2359	0.2383	0.2085	0.2132	0.162	0.181	0.215	0.254	0.2715	0.2414	0.2171	0.2193	0.2707	0.2321	0.2738	0.3099	0.2689	0.2766
10.9878	1005.69	4.8506	4.6247	4.1689	4.2548	4.2928	4.2213	4.1025	3.7849	4.2876	4.3304	3.8445	3.4189	3.2938	3.1274	3.7614	3.5077	3.4854	3.6564	3.5119	3.5471	4.621	4.3434	3.969	4.0099	4.2204	4.0823	3.9869	3.8458	4.1153	4.1563	3.4411	3.3677	3.8407	3.3985	3.4769	3.5765
10.9891	460.279	0.589	0.477	0.5655	0.4372	0.5035	0.5738	0.4887	0.7193	0.5443	0.5497	0.8189	0.589	0.8866	0.9111	0.7105	0.6305	0.6687	0.62	0.7294	0.7367	0.65	0.5077	0.6494	0.5624	0.5644	0.5941	0.5396	0.7112	0.5941	0.6	0.5341	0.5664	0.67	0.5339	0.5703	0.5867
10.9903	480.344	15.2216	16.4737	16.1566	13.8672	16.062	13.3657	13.8657	11.8511	14.608	14.754	18.0948	15.6409	14.4768	13.1174	15.7453	16.3798	15.1899	16.4128	15.6322	15.7885	16.024	16.3458	15.814	13.8147	16.2214	14.271	14.345	13.3448	14.9481	15.0966	15.2636	15.8117	17.3804	15.8163	15.9073	16.3631
10.9906	438.297	1.8377	1.3704	1.8832	1.4482	1.7953	1.6016	1.7616	1.963	1.7076	1.7247	2.6489	2.012	2.8462	2.5874	2.5309	1.9378	1.8974	1.9252	2.2982	2.3212	2.0518	1.5393	2.1359	1.7532	2.0116	1.7037	1.8142	2.0022	1.8664	1.885	1.7198	1.7048	1.9364	1.6823	1.7432	1.7932
10.9969	360.292	0.2403	0.28	0.2207	0.2761	0.3004	0.245	0.2449	0.301	0.2636	0.2662	0.2773	0.2692	0.271	0.3337	0.3186	0.378	0.3861	0.3729	0.3259	0.3291	0.2509	0.2787	0.2345	0.2935	0.3096	0.2814	0.2834	0.3274	0.2808	0.2836	0.2946	0.2876	0.3268	0.3234	0.305	0.3138
11.0028	311.257	0.2931	0.2712	0.2463	0.3739	0.2487	0.2823	0.3018	0.3057	0.2904	0.2933	0.3419	0.2428	0.2292	0.3586	0.3476	0.3821	0.3417	0.4217	0.3332	0.3365	0.3069	0.2654	0.2432	0.3737	0.2779	0.3106	0.3151	0.3438	0.3028	0.3058	0.3509	0.4567	0.3616	0.3993	0.3882	0.3993
11.0034	468.306	0.3059	0.251	0.326	0.4148	0.4387	0.4505	0.4693	0.4396	0.387	0.3908	0.4398	0.4092	0.4188	0.346	0.5074	0.4318	0.3832	0.4486	0.4231	0.4273	0.3413	0.2922	0.3511	0.4014	0.463	0.4503	0.4521	0.453	0.3983	0.4022	0.3382	0.3899	0.4716	0.3368	0.3803	0.3912
11.0049	382.274	1.0556	1.1368	1.0211	1.4291	1.3703	1.4833	1.5085	0.986	1.2488	1.2613	1.275	1.2542	1.2159	1.38	1.5466	1.7497	1.5348	1.5419	1.4373	1.4516	1.1163	1.1721	1.0754	1.4309	1.4363	1.5664	1.5306	1.1566	1.3034	1.3164	1.4036	1.0443	1.143	1.1661	1.1774	1.2111
11.0085	328.266	0.8	0.8448	0.7853	0.8929	1.049	1.0396	0.937	0.8098	0.8948	0.9037	0.8341	0.8811	0.88	0.775	0.9243	1.1242	1.0355	0.9831	0.9297	0.939	0.8127	0.8582	0.8132	0.8718	1.0326	1.0718	0.9717	0.8755	0.9086	0.9176	0.8955	0.8053	0.8127	0.7932	0.8184	0.8419
11.0113	301.14	2.0033	2.814	2.3074	3.3398	2.6317	2.6003	3.1774	2.8146	2.7111	2.7382	2.5655	3.1182	2.8713	2.8314	3.1232	3.2136	3.1603	2.7296	2.9516	2.9812	2.1554	2.9049	2.4615	3.2436	2.7977	2.7833	3.2055	2.8627	2.787	2.8146	2.8253	3.106	3.2885	2.538	2.9101	2.9934
11.0171	529.348	0.1719	0.2987	0.2827	0.3003	0.2403	0.2896	0.2505	0.2174	0.2564	0.259	0.2929	0.4017	0.3163	0.2605	0.3102	0.4052	0.3679	0.3263	0.3351	0.3385	0.2033	0.3262	0.2926	0.2932	0.2619	0.322	0.283	0.2514	0.2777	0.2805	0.2432	0.2996	0.2172	0.2433	0.2483	0.2554
11.0195	1193.74	0.2477	0.2352	0.2517	0.263	0.3298	0.2378	0.3067	0.2611	0.2666	0.2693	0.2557	0.1611	0.2128	0.2532	0.2326	0.2781	0.2011	0.2991	0.2367	0.2391	0.251	0.2177	0.2431	0.2631	0.3097	0.2505	0.2829	0.2776	0.2605	0.2631	0.3	0.3389	0.3665	0.3084	0.3252	0.3345
11.0213	518.321	3.2633	3.4508	3.7028	3.1634	3.1117	4.7741	4.049	4.3885	3.738	3.7753	2.4514	3.1887	2.4346	2.1013	2.3903	2.5369	2.1737	2.1163	2.4242	2.4484	3.0748	3.4019	3.4012	2.9242	2.9726	4.2521	3.6119	3.9018	3.4266	3.4607	2.2915	1.9028	1.7749	1.7677	1.9149	1.9698
11.0241	329.266	0.1634	0.1901	0.2026	0.2768	0.2819	0.2744	0.2814	0.2165	0.2359	0.2382	0.1802	0.2504	0.2619	0.2207	0.2451	0.2313	0.2164	0.228	0.2293	0.2315	0.1685	0.2063	0.2186	0.2653	0.2767	0.2662	0.2677	0.2249	0.2355	0.2379	0.2385	0.2307	0.218	0.2526	0.2326	0.2393
11.025	279.232	13.0444	14.6359	14.53	17.8556	12.9068	18.7995	16.997	19.5874	16.0446	16.205	12.603	17.9778	12.0208	13.3305	11.0532	11.8985	10.9552	13.2281	12.8834	13.0122	12.9988	15.5529	13.9697	16.8803	12.6231	17.2309	15.6292	18.4078	15.3347	15.4872	15.0662	14.9702	15.0458	15.6421	15.0293	15.4599
11.0279	243.22	0.2802	0.2876	0.3925	0.5291	0.3168	0.4277	0.405	0.4467	0.3857	0.3896	0.2453	0.4064	0.2739	0.3279	0.2852	0.3253	0.1874	0.283	0.2918	0.2947	0.2728	0.319	0.3645	0.4831	0.3134	0.4059	0.3536	0.4149	0.3641	0.3677	0.3341	0.3211	0.433	0.312	0.3465	0.3565
11.0333	261.219	0.7933	0.7625	0.8126	0.9909	0.6613	1.0571	0.8539	1.0717	0.8754	0.8842	0.5861	0.9108	0.6514	0.5955	0.5572	0.5256	0.5236	0.5107	0.6076	0.6137	0.745	0.8038	0.776	0.9	0.6444	0.9323	0.7784	0.9512	0.8126	0.8207	0.7472	0.5696	0.8709	0.7541	0.7281	0.749
11.0347	504.341	18.3498	16.5141	17.0337	20.1388	15.2702	18.5399	15.055	18.3377	17.4049	17.5789	15.1596	16.1909	14.9678	12.5411	13.3059	13.29	11.141	12.5218	13.6398	13.7762	17.6369	16.5151	16.598	18.4028	14.9934	17.3898	14.2102	17.2695	16.5499	16.7145	20.1438	17.3324	15.8516	17.8297	17.6115	18.1161
11.0364	482.359	29.0906	31.7674	29.2251	28.7261	27.9331	23.3656	21.6091	24.8518	27.0711	27.3418	27.8951	26.0845	28.3264	27.8573	30.5336	30.1593	27.7754	26.837	28.1836	28.4654	28.9356	30.4913	29.1458	28.7918	29.0217	25.3371	23.4026	25.9942	27.5029	27.7762	27.9423	25.8005	26.7588	26.3583	26.4478	27.2057
11.0481	1033.72	2.6167	2.4377	2.4685	2.2269	2.151	1.5953	2.1234	1.7688	2.1735	2.1953	1.6708	1.3598	1.6797	0.8861	1.7389	1.712	1.7763	1.4575	1.5351	1.5505	2.3911	2.1777	2.2818	1.9073	2.0771	1.6413	2.0565	1.7313	2.0242	2.0444	1.5319	1.5725	1.6916	1.4948	1.557	1.6016
11.0608	1069.71	4.4158	5.2282	4.6373	4.9839	5.144	5.2083	5.6448	5.3333	5.0745	5.1252	6.2025	4.73	5.7906	5.2752	6.1167	6.1147	6.3264	5.3117	5.7335	5.7908	4.8893	5.1285	4.952	5.108	5.4716	5.4927	5.8763	5.461	5.2693	5.3216	5.8424	5.7249	5.5499	5.5603	5.6127	5.7735
11.0646	808.032	1.4598	1.5925	1.4898	1.774	1.7288	2	1.7715	1.8565	1.7091	1.7262	2.1821	1.8223	2.2299	2.0235	2.6946	2.5511	2.4502	2.2638	2.2772	2.3	1.6496	1.6585	1.6842	1.8554	2.0034	2.161	1.9627	2.0098	1.8622	1.8807	2.0151	1.8961	1.8961	1.8315	1.8906	1.9448
11.0655	1045.72	1.2247	1.1749	1.1749	0.8892	1.0731	0.6455	0.9226	0.7688	0.9842	0.9941	1.2049	0.9228	0.6647	0.8052	1.0223	1.0229	1.0581	0.8694	0.9463	0.9558	1.2259	1.1171	1.052	0.8767	1.0761	0.7484	0.9666	0.8144	0.9801	0.9898	0.6738	0.8293	0.6339	0.7426	0.7127	0.7331
11.0692	707.483	0.1761	0.1353	0.1621	0.1848	0.1919	0.1505	0.2113	0.1546	0.1708	0.1725	0.1821	0.1994	0.163	0.1805	0.2043	0.2057	0.1896	0.1899	0.1893	0.1912	0.1785	0.1522	0.1631	0.1856	0.198	0.1661	0.2079	0.1677	0.1764	0.1782	0.1696	0.1834	0.2221	0.2472	0.2035	0.2094
11.0736	663.456	0.189	0.299	0.217	0.2731	0.1803	0.2737	0.2657	0.2447	0.2428	0.2452	0.3633	0.2835	0.25	0.3206	0.2746	0.3173	0.3224	0.352	0.3105	0.3136	0.234	0.2966	0.2264	0.2879	0.2073	0.2876	0.2829	0.279	0.2613	0.2639	0.2829	0.2631	0.2896	0.339	0.2907	0.299
11.0847	619.43	0.2398	0.3311	0.2378	0.2758	0.2771	0.262	0.2516	0.3015	0.2721	0.2748	0.3645	0.3179	0.3903	0.404	0.3584	0.3977	0.3571	0.4538	0.3805	0.3843	0.2725	0.3294	0.2775	0.3112	0.3022	0.2993	0.2811	0.349	0.301	0.304	0.2764	0.2885	0.2851	0.3321	0.2926	0.301
11.0871	487.358	0.3185	0.4715	0.3778	0.4498	0.3973	0.4329	0.4957	0.4154	0.4199	0.4241	0.4436	0.5075	0.4114	0.4658	0.4385	0.5458	0.6035	0.5081	0.4905	0.4954	0.3517	0.4829	0.3882	0.4584	0.4139	0.4661	0.5283	0.4501	0.4401	0.4444	0.4256	0.3951	0.4714	0.4108	0.4215	0.4335
11.1018	524.37	99.6374	94.4738	91.5823	94.963	94.3363	73.663	93.6809	98.7431	92.635	93.5613	97.4601	90.8145	93.4312	88.0668	101.197	97.4353	102.236	92.9114	95.444	96.3985	99.5908	94.0222	92.5117	94.1541	97.5179	80.479	96.8193	99.6809	93.8602	94.793	82.7545	81.9245	65.7543	80.0554	76.846	79.0479
11.1038	1047.73	74.2452	79.5492	76.3972	79.2326	75.9122	80.0538	80.7675	80.1251	78.2854	79.0682	79.6506	75.2934	75.0141	74.4599	81.5256	80.3763	81.9842	73.4282	77.7165	78.4937	75.9852	78.8724	76.4338	78.8079	78.4963	80.9529	81.902	80.3703	78.5769	79.3579	68.5866	71.3795	74.751	70.6134	70.6193	72.6428
11.1079	269.226	0.6666	0.8137	0.734	0.8068	0.6939	1.1759	0.884	0.9724	0.8434	0.8518	0.851	0.5016	0.842	0.6408	0.6799	0.8069	0.8546	0.5702	0.7184	0.7256	0.7165	0.739	0.765	0.7725	0.7007	1.0938	0.8855	0.8911	0.8165	0.8246	0.6255	0.6853	0.7355	0.5675	0.6469	0.6655
11.1299	76.9431	0.2764	0.327	0.2843	0.3166	0.2871	0.3045	0.3254	0.3099	0.3039	0.3069	0.3222	0.3364	0.3021	0.3621	0.3269	0.3457	0.2464	0.2492	0.3114	0.3145	0.2894	0.331	0.2902	0.3314	0.3017	0.3181	0.3086	0.3017	0.3075	0.3105	0.2496	0.3076	0.2267	0.2691	0.2606	0.2681
11.1315	76.7539	0.4115	0.4741	0.4905	0.4365	0.5394	0.4828	0.5701	0.4985	0.4879	0.4928	0.4558	0.3939	0.4517	0.4354	0.4802	0.4508	0.5105	0.4823	0.4576	0.4622	0.4248	0.4562	0.4832	0.4406	0.5322	0.4796	0.5607	0.5067	0.483	0.4878	0.3796	0.4612	0.418	0.3576	0.4001	0.4115
11.1354	76.816	0.3568	0.286	0.2529	0.3142	0.2929	0.305	0.3194	0.2798	0.3009	0.3039	0.2701	0.3073	0.2892	0.2856	0.3389	0.476	0.3072	0.2976	0.3215	0.3247	0.3367	0.2928	0.2633	0.31	0.3091	0.3517	0.3195	0.2915	0.3078	0.3108	0.2581	0.2524	0.24	0.2645	0.2512	0.2584
11.1549	1069.72	6.7635	6.7561	6.5252	7.3265	7.2207	7.322	8.1124	7.4976	7.1905	7.2624	7.491	7.044	7.8453	7.5227	8.2032	8.3401	8.3683	7.2142	7.7536	7.8311	6.9814	6.8626	6.8915	7.4498	7.582	7.6564	8.2605	7.6106	7.3728	7.4461	7.1598	6.8374	7.3089	7.0253	7.012	7.2129
11.1553	415.041	0.3151	0.2967	0.2306	0.3867	0.2377	0.3111	0.3176	0.2791	0.2968	0.2998	0.322	0.3337	0.3578	0.366	0.3196	0.3116	0.3188	0.3007	0.3288	0.3321	0.3184	0.3075	0.2639	0.3853	0.2624	0.3144	0.3211	0.2917	0.3066	0.3096	0.3366	0.3624	0.3419	0.3274	0.3387	0.3484
11.1591	808.031	1.4855	1.8516	1.6504	2.0644	1.8578	1.938	1.8071	1.6814	1.792	1.8099	2.2557	2.3087	2.4935	2.2346	2.2615	2.3606	2.324	2.1769	2.3019	2.325	1.6875	1.9763	1.8716	2.1284	1.9896	2.0656	1.9574	1.8535	1.9309	1.9501	1.7654	1.8584	1.9564	1.7739	1.8201	1.8723
11.1659	305.247	18.1612	14.2555	18.3912	18.7858	15.8871	20.1499	17.2449	16.025	17.3626	17.5362	14.9788	20.6184	23.735	23.7769	16.5303	15.6912	16.338	15.3689	18.3797	18.5635	17.4493	15.9334	19.8335	20.2464	16.291	19.2181	17.1895	16.2534	17.7162	17.8923	20.5146	20.4871	21.7701	20.8295	20.6913	21.2842
11.1674	611.913	0.109	0.161	0.1355	0.1499	0.1575	0.1351	0.1306	0.1699	0.1436	0.145	0.2337	0.1429	0.1797	0.1268	0.163	0.1841	0.2455	0.1913	0.1834	0.1852	0.141	0.1572	0.1473	0.1455	0.1613	0.149	0.1612	0.1798	0.1544	0.156	0.1478	0.1335	0.1696	0.1636	0.1521	0.1564
11.168	322.273	0.8058	0.7238	0.7311	0.9769	0.7965	1.1562	1.094	1.0798	0.9205	0.9297	1.0351	1.1912	1.3611	1.4672	1.21	1.17	1.1469	1.0741	1.207	1.219	0.8678	0.8454	0.8939	1.1117	0.9149	1.1715	1.1187	1.1053	0.998	1.008	1.6992	1.5536	1.7231	1.5604	1.6177	1.6641
11.1714	327.229	10.7018	10.5643	11.8742	16.0641	12.0006	16.0232	16.3353	12.4843	13.256	13.3885	18.3775	22.4816	24.0143	24.4228	22.026	20.6919	22.2468	19.816	21.7596	21.9772	12.6942	13.6262	14.9999	18.3562	14.7621	17.3777	18.01	14.721	15.4792	15.633	21.5165	21.3799	22.4857	21.7403	21.5628	22.1807
11.1741	1117.74	0.3537	0.3442	0.3219	0.3429	0.2916	0.3451	0.3888	0.3632	0.3439	0.3474	0.4588	0.4145	0.3874	0.4255	0.2425	0.3027	0.3488	0.297	0.3597	0.3632	0.382	0.3637	0.3401	0.3674	0.2833	0.3378	0.3826	0.3549	0.3498	0.3533	0.3091	0.3559	0.3405	0.2812	0.3185	0.3276
11.1742	614.402	0.218	0.2628	0.2194	0.3132	0.1592	0.2786	0.2032	0.2202	0.2343	0.2367	0.3285	0.3912	0.3052	0.2604	0.3739	0.4452	0.3968	0.291	0.349	0.3525	0.247	0.2965	0.2422	0.3029	0.2169	0.3239	0.2547	0.2443	0.2646	0.2673	0.2503	0.1858	0.2189	0.2741	0.23	0.2365
11.1875	207.164	0.3966	0.2932	0.3371	0.4435	0.327	0.4293	0.3546	0.338	0.3649	0.3686	0.2871	0.4238	0.3773	0.3304	0.2869	0.3193	0.2679	0.2562	0.3186	0.3218	0.371	0.3276	0.349	0.4191	0.3216	0.4056	0.3361	0.325	0.3552	0.3588	0.3674	0.3952	0.4498	0.4544	0.4125	0.4244
11.1886	985.66	0.5774	0.6269	0.5448	0.6178	0.5767	0.52	0.5269	0.5635	0.5693	0.5749	0.4771	0.6667	0.5093	0.6234	0.5529	0.5316	0.4561	0.5135	0.5413	0.5467	0.555	0.6401	0.5386	0.6254	0.5792	0.5283	0.5142	0.5645	0.5654	0.571	0.4219	0.4392	0.5868	0.593	0.5051	0.5196
11.191	556.373	0.7954	0.8932	0.8391	0.8671	0.5803	0.5697	0.5117	0.671	0.7159	0.7231	0.8299	1.0223	1.0946	0.9325	0.9395	0.7366	0.7221	0.6896	0.8709	0.8796	0.8081	0.9303	0.9079	0.8924	0.6815	0.6181	0.5706	0.6927	0.7591	0.7666	0.6988	0.6766	0.7816	0.8953	0.7554	0.7771
11.1914	622.378	0.8869	0.7765	1.0568	1.0156	0.9014	1.259	1.1607	1.0995	1.0196	1.0297	1.4277	1.5878	1.2273	1.2885	1.2357	1.49	1.2568	1.3731	1.3609	1.3745	1.0279	0.9852	1.1052	1.0953	1.001	1.3308	1.1971	1.1988	1.1115	1.1225	1.432	1.6418	1.4793	1.494	1.4967	1.5395
11.1927	143.105	0.1524	0.1774	0.1616	0.17	0.153	0.1845	0.1585	0.1536	0.1639	0.1655	0.1407	0.2014	0.1466	0.1796	0.2194	0.1147	0.1395	0.1772	0.1649	0.1665	0.1502	0.1843	0.1586	0.1741	0.1724	0.1686	0.1553	0.1636	0.165	0.1667	0.1888	0.2047	0.1933	0.198	0.1942	0.1998
11.1928	179.142	0.5074	0.529	0.4725	0.505	0.2772	0.4709	0.4196	0.5488	0.4663	0.471	0.4353	0.4756	0.4679	0.4964	0.3822	0.373	0.2788	0.3223	0.4039	0.408	0.4918	0.5182	0.4737	0.5079	0.3084	0.4507	0.388	0.5031	0.4531	0.4576	0.4994	0.5795	0.5251	0.6057	0.5469	0.5626
11.1929	303.229	9.8488	9.2639	9.9682	15.7533	10.0225	12.2184	14.4411	13.1996	11.8395	11.9579	19.5932	19.8294	19.8944	19.0383	21.3833	17.7754	18.06	19.2761	19.3563	19.5498	12.3592	11.978	12.5252	16.7485	13.0982	13.7607	15.5116	15.1247	13.8054	13.9425	22.5087	23.0093	25.1946	23.5016	23.318	23.9862
11.1931	171.137	0.3884	0.3017	0.365	0.4566	0.3261	0.3845	0.3209	0.3722	0.3644	0.3681	0.3969	0.4541	0.4277	0.4352	0.3702	0.2711	0.2945	0.3381	0.3735	0.3772	0.3925	0.3417	0.3827	0.4557	0.3423	0.3595	0.3174	0.3726	0.3687	0.3724	0.4396	0.5208	0.5211	0.5315	0.4982	0.5125
11.1932	183.136	0.4597	0.3571	0.4031	0.3866	0.2822	0.4079	0.4126	0.3675	0.3846	0.3884	0.4055	0.5407	0.3571	0.3087	0.3216	0.3084	0.3572	0.2965	0.362	0.3656	0.4483	0.4052	0.3935	0.3706	0.2966	0.3867	0.4027	0.3581	0.381	0.3848	0.541	0.5603	0.5397	0.5536	0.5432	0.5587
11.1936	111.115	0.3387	0.2604	0.2666	0.3754	0.2471	0.3077	0.2971	0.3691	0.3078	0.3108	0.2578	0.2532	0.2694	0.2878	0.2384	0.2331	0.2031	0.2629	0.2507	0.2532	0.32	0.2599	0.2687	0.3568	0.2486	0.2918	0.2762	0.3505	0.2951	0.298	0.3599	0.3531	0.3274	0.374	0.3501	0.3601
11.1939	165.125	0.3816	0.2611	0.315	0.37	0.2213	0.3794	0.3263	0.3382	0.3241	0.3274	0.3435	0.3586	0.296	0.2392	0.3301	0.2774	0.2326	0.3163	0.2992	0.3022	0.3739	0.287	0.3118	0.3403	0.2526	0.3573	0.3057	0.3409	0.3196	0.3228	0.2936	0.3589	0.4264	0.4337	0.3744	0.3851
11.1943	848.572	1.0571	0.9394	1.1462	1.3402	1.1372	1.362	1.3833	1.7102	1.2595	1.272	1.0356	1.446	1.1516	0.8421	1.1043	1.1285	1.0547	1.2292	1.124	1.1352	1.057	1.072	1.1534	1.2266	1.1458	1.3163	1.3136	1.6267	1.2322	1.2445	1.3859	1.5541	1.7238	1.5458	1.5369	1.5809
11.1948	193.157	0.5952	0.3957	0.5124	0.5423	0.3079	0.5423	0.4608	0.4808	0.4797	0.4845	0.4125	0.5697	0.471	0.4472	0.3804	0.3498	0.2662	0.4109	0.4135	0.4176	0.5521	0.4416	0.5045	0.5235	0.3312	0.4987	0.4159	0.4745	0.4656	0.4702	0.5357	0.5888	0.5756	0.5081	0.5465	0.5622
11.1949	299.274	0.1371	0.1189	0.1254	0.1387	0.1593	0.1541	0.1439	0.1508	0.141	0.1424	0.1716	0.1819	0.1906	0.1534	0.1536	0.2111	0.1657	0.1541	0.1727	0.1745	0.1465	0.1354	0.1425	0.1438	0.1602	0.1702	0.1509	0.1554	0.1498	0.1513	0.1783	0.2041	0.2028	0.2688	0.2114	0.2174
11.1951	263.236	8.7001	7.7731	8.2815	9.5698	6.9405	8.7617	8.702	9.7327	8.5577	8.6433	8.4429	9.7022	8.3452	7.9765	8.1959	6.3236	6.3831	6.9537	7.7904	7.8683	8.6791	8.2991	8.3394	9.2592	7.3679	8.2291	8.1992	9.2465	8.4113	8.4949	10.0956	10.2908	10.0317	10.1505	10.0407	10.3284
11.1953	874.587	0.7582	0.7548	0.8472	0.8033	0.592	0.7854	0.4588	0.7759	0.722	0.7292	0.9824	1.1519	0.8265	0.7195	0.8277	0.6067	0.7917	0.8717	0.8473	0.8557	0.8186	0.8588	0.8463	0.79	0.6616	0.7478	0.5484	0.8204	0.7576	0.7652	0.9699	0.8968	0.9924	0.9886	0.9523	0.9796
11.1955	157.121	0.308	0.2551	0.2386	0.3132	0.1682	0.277	0.3237	0.2089	0.2616	0.2642	0.234	0.3222	0.2941	0.2203	0.2189	0.2165	0.2329	0.2028	0.2427	0.2451	0.2909	0.2733	0.2538	0.2926	0.1838	0.2644	0.3038	0.2125	0.2583	0.2608	0.3096	0.3321	0.3218	0.2274	0.2947	0.3032
11.1958	225.183	0.6066	0.4538	0.5587	0.5622	0.4444	0.5731	0.5007	0.5256	0.5281	0.5334	0.4117	0.621	0.5782	0.4918	0.4722	0.4691	0.3731	0.3446	0.4702	0.4749	0.5604	0.4983	0.5664	0.5499	0.4582	0.5524	0.4733	0.4912	0.5164	0.5216	0.6554	0.6337	0.6727	0.6507	0.6466	0.6651
11.1959	897.606	0.6987	0.7043	0.862	0.7512	0.7403	0.7282	0.7096	0.6879	0.7353	0.7426	0.603	0.7974	0.688	0.9333	0.8756	0.7313	0.7318	0.756	0.7646	0.7722	0.6781	0.7313	0.8224	0.8051	0.7862	0.7364	0.7225	0.723	0.7468	0.7542	0.7365	0.6032	0.718	0.688	0.6796	0.699
11.1963	185.152	0.5403	0.5565	0.4913	0.556	0.4188	0.5712	0.5071	0.608	0.5312	0.5365	0.512	0.6129	0.4723	0.4924	0.5667	0.444	0.3981	0.4645	0.4954	0.5003	0.5359	0.5735	0.489	0.5453	0.4632	0.5446	0.4845	0.5855	0.5251	0.5303	0.6801	0.6849	0.5807	0.7105	0.6574	0.6762
11.198	239.197	0.1415	0.151	0.1964	0.1529	0.1008	0.1264	0.1633	0.1777	0.1513	0.1528	0.1563	0.1946	0.1632	0.1536	0.1046	0.1053	0.1237	0.1534	0.1443	0.1458	0.146	0.1628	0.189	0.1546	0.1033	0.1223	0.1549	0.1758	0.1503	0.1518	0.1751	0.2007	0.2314	0.1496	0.1873	0.1927
11.1991	175.147	0.1642	0.1286	0.1768	0.2306	0.1878	0.1612	0.1556	0.1786	0.1729	0.1747	0.1392	0.2011	0.1967	0.2083	0.19	0.1294	0.1236	0.1308	0.1649	0.1665	0.1587	0.1475	0.1827	0.2272	0.1912	0.1547	0.149	0.1705	0.1719	0.1736	0.146	0.1908	0.1828	0.2123	0.1811	0.1863
11.1997	854.581	0.3593	0.3431	0.3937	0.3154	0.3961	0.4079	0.4189	0.4534	0.386	0.3898	0.534	0.4623	0.3086	0.5345	0.4555	0.502	0.4262	0.4085	0.454	0.4585	0.4052	0.3749	0.3742	0.3744	0.4173	0.4361	0.425	0.4529	0.4053	0.4093	0.4429	0.5349	0.4564	0.5262	0.4852	0.4991
11.2067	436.348	0.2209	0.2315	0.2305	0.2445	0.2193	0.2786	0.289	0.3435	0.2572	0.2598	0.237	0.2295	0.1965	0.2119	0.2281	0.2643	0.2795	0.26	0.2383	0.2407	0.2261	0.2322	0.2231	0.2386	0.2249	0.2778	0.2895	0.3302	0.2539	0.2564	0.2709	0.2973	0.2348	0.2619	0.2636	0.2711
11.2071	809.556	0.8589	0.8343	0.8056	0.7374	1.0424	1.0342	0.9697	0.9443	0.9034	0.9124	0.953	1.0687	1.0683	1.2354	1.0169	1.0397	1.07	1.0012	1.0567	1.0672	0.887	0.8977	0.876	0.8718	1.0515	1.0462	1.0052	0.9828	0.9471	0.9565	0.8315	0.7518	0.96	1.0614	0.8922	0.9177
11.2075	765.527	0.9978	1.1068	1.1353	1.1051	1.1173	1.1347	1.0255	1.1369	1.0949	1.1059	1.4178	1.396	1.1255	1.3382	1.3983	1.4554	1.2459	1.0608	1.3047	1.3178	1.1089	1.1854	1.1386	1.1756	1.2064	1.2281	1.0922	1.1453	1.1541	1.1655	1.0952	1.0076	0.9703	1.0385	1.0176	1.0468
11.2112	721.502	1.1524	1.3755	1.4511	1.3456	1.2084	1.2319	1.3459	1.5315	1.3303	1.3436	1.4649	1.5831	1.4482	1.7324	1.523	1.5785	1.5263	1.3168	1.5217	1.5369	1.2371	1.4348	1.4577	1.4577	1.3075	1.3329	1.4057	1.5134	1.3861	1.3998	1.4557	1.4268	1.3404	1.6215	1.4465	1.4879
11.2114	298.273	0.3904	0.377	0.4191	0.4851	0.3879	0.4958	0.4663	0.5744	0.4495	0.454	0.5777	0.6541	0.5316	0.535	0.6593	0.5895	0.4444	0.5511	0.5678	0.5735	0.4397	0.4489	0.4496	0.5027	0.4636	0.5248	0.4655	0.5826	0.4819	0.4867	1.0375	0.887	0.9287	0.9452	0.9401	0.967
11.2139	325.211	0.7108	0.8456	0.6299	0.8678	0.8216	0.9984	1.0088	0.958	0.8551	0.8637	1.0012	0.9921	0.9545	1.038	1.1798	1.1758	1.1651	0.9859	1.0616	1.0722	0.7877	0.8868	0.7151	0.9199	0.9262	1.0538	1.059	0.9893	0.9121	0.9211	1.1682	1.0566	1.0268	1.0885	1.0742	1.105
11.2155	359.305	0.2081	0.2729	0.3068	0.393	0.2575	0.338	0.3255	0.2549	0.2946	0.2975	0.3275	0.3424	0.3146	0.355	0.3352	0.2881	0.3633	0.2671	0.3242	0.3274	0.2393	0.2918	0.3103	0.3872	0.2814	0.3287	0.3385	0.2645	0.3037	0.3067	0.3345	0.3589	0.3016	0.3038	0.3215	0.3307
11.2183	677.478	1.6281	1.7773	1.7609	1.7388	1.881	1.6112	1.675	1.5648	1.7046	1.7217	1.8689	1.9605	1.9246	2.1438	1.9861	2.1135	1.9061	1.7922	1.962	1.9816	1.6971	1.8324	1.8111	1.8595	1.9363	1.7558	1.751	1.6636	1.7792	1.7968	1.7251	1.8729	1.9465	2.0118	1.8702	1.9238
11.2191	672.523	0.6084	0.5778	0.6856	0.7104	0.5942	0.5657	0.6263	0.5622	0.6163	0.6225	0.6113	0.5385	0.5144	0.612	0.6402	0.5736	0.537	0.4724	0.5624	0.568	0.6122	0.5708	0.6458	0.6924	0.615	0.5735	0.6099	0.5527	0.6061	0.6122	0.6246	0.5714	0.6724	0.633	0.6191	0.6368
11.2202	417.328	0.1765	0.1554	0.1341	0.2464	0.1854	0.2053	0.2278	0.1677	0.1873	0.1892	0.2355	0.3045	0.2243	0.266	0.2115	0.2362	0.2011	0.2162	0.2369	0.2393	0.1923	0.1938	0.1576	0.2539	0.1949	0.2153	0.2233	0.1846	0.2009	0.2029	0.2124	0.1761	0.1776	0.237	0.1988	0.2045
11.2203	716.549	0.3282	0.4987	0.4185	0.3881	0.3509	0.4769	0.4779	0.3495	0.4111	0.4152	0.513	0.4438	0.5121	0.4505	0.4737	0.4348	0.4967	0.3931	0.4647	0.4694	0.3765	0.4873	0.4443	0.4079	0.3878	0.471	0.4876	0.3697	0.4269	0.4312	0.5588	0.4617	0.4404	0.67	0.5274	0.5425
11.2238	633.453	1.8539	2.4182	2.2118	2.0657	2.0561	2.4007	2.3395	2.1714	2.1897	2.2116	2.3876	2.6111	2.3239	2.9161	2.5475	2.6468	2.547	2.4243	2.5505	2.576	1.998	2.479	2.2513	2.3032	2.2135	2.488	2.4163	2.2921	2.2931	2.3158	2.205	2.1579	2.319	2.4548	2.2613	2.3261
11.2271	628.495	0.7437	0.8183	0.842	0.7883	0.797	0.7769	0.8417	0.684	0.7865	0.7944	0.812	0.7199	0.8102	0.8494	0.843	0.8935	0.8123	0.6811	0.8027	0.8107	0.7647	0.7975	0.8382	0.8118	0.8208	0.8146	0.8428	0.7003	0.795	0.8029	0.7907	0.7633	0.8635	0.7831	0.7921	0.8148
11.2294	584.47	0.8286	1.0375	0.8358	0.8143	0.8047	0.8122	0.8934	0.8528	0.8599	0.8685	0.9217	0.797	0.776	0.9322	0.853	1.0009	1.1141	0.7101	0.8881	0.897	0.8563	0.982	0.8249	0.8525	0.8292	0.8686	0.9588	0.8367	0.8718	0.8805	0.921	0.8318	0.8904	0.9111	0.8797	0.9049
11.2301	589.427	1.9982	2.3293	2.321	2.2494	2.2637	2.4924	2.4193	2.5019	2.3219	2.3451	2.7791	2.8213	2.7151	3.2368	2.6371	3.1863	2.7119	2.5246	2.8265	2.8548	2.2055	2.4652	2.4322	2.5237	2.3938	2.6948	2.5186	2.5704	2.4624	2.4868	2.3655	2.4237	2.6961	2.4774	2.4658	2.5364
11.2384	545.401	2.2909	2.7164	2.5929	2.6534	2.4927	2.4464	2.5558	2.4628	2.5264	2.5517	2.8808	3.1256	2.8897	3.1046	2.8811	3.2038	3.088	2.8157	2.9987	3.0286	2.4514	2.8333	2.6809	2.795	2.6301	2.6646	2.7176	2.617	2.6598	2.6863	2.7263	3.0218	2.7901	2.9966	2.8549	2.9367
11.239	501.375	2.873	3.1254	3.1416	3.162	2.75	2.9961	3.1499	3.2328	3.0539	3.0844	3.5666	3.6868	3.407	3.9456	4.0859	3.6763	3.5983	3.316	3.6603	3.6969	3.0627	3.2828	3.2245	3.3934	3.1352	3.2002	3.2964	3.3355	3.2241	3.2562	3.1521	3.3794	3.6817	3.2666	3.3363	3.4318
11.2428	466.327	0.9733	0.7528	0.9815	1.1294	0.8076	0.8166	0.7904	0.7598	0.8764	0.8852	1.3918	1.0481	1.2911	1.2842	1.1638	1.087	1.1337	1.1112	1.1889	1.2008	1.0839	0.8311	1.0646	1.1802	0.9114	0.8939	0.886	0.871	0.9603	0.9698	0.9027	0.8956	0.8789	0.9118	0.8883	0.9137
11.2445	452.392	0.6462	0.618	0.593	0.6247	0.5187	0.6397	0.6724	0.6019	0.6143	0.6205	0.7459	0.5883	0.7524	0.7466	0.7012	0.7028	0.694	0.7017	0.7041	0.7112	0.6746	0.6136	0.6362	0.662	0.5735	0.6623	0.6848	0.6431	0.6404	0.6468	0.6896	0.5828	0.7033	0.757	0.6763	0.6957
11.248	413.322	1.7855	1.9815	1.7307	2.0325	1.7894	2.0108	2.1051	2.2117	1.9559	1.9755	2.4528	2.5191	2.5261	2.5754	2.4352	2.5646	2.5762	2.2757	2.4906	2.5155	1.963	2.1272	1.9403	2.1913	1.9825	2.1726	2.2468	2.2838	2.1019	2.1228	2.2752	2.1581	2.1602	2.3412	2.2113	2.2747
11.2496	363.251	0.5652	0.6274	0.5279	0.6198	0.5554	0.6347	0.5724	0.5223	0.5781	0.5839	0.7198	0.6882	0.7702	0.7529	0.7145	0.7651	0.7176	0.6754	0.7255	0.7327	0.6071	0.6459	0.5918	0.6599	0.6047	0.6744	0.6153	0.5755	0.6186	0.6247	0.5491	0.432	0.5066	0.5125	0.495	0.5092
11.251	391.337	0.5025	0.7332	0.4392	0.5163	0.5482	0.6511	0.4836	0.6175	0.5615	0.5671	0.6181	0.4572	0.5673	0.5741	0.5641	0.6372	0.7681	0.5536	0.5925	0.5984	0.5342	0.6672	0.4738	0.5362	0.5605	0.6542	0.5611	0.6162	0.5724	0.5781	0.5663	0.457	0.4971	0.5688	0.5171	0.5319
11.2514	347.314	0.3696	0.32	0.3195	0.4139	0.2909	0.3302	0.3969	0.3761	0.3521	0.3557	0.3603	0.4048	0.3621	0.4645	0.4022	0.4049	0.4369	0.3201	0.3945	0.3984	0.3691	0.343	0.3319	0.4309	0.3239	0.3526	0.4112	0.3708	0.3648	0.3684	0.3781	0.3758	0.3305	0.3581	0.357	0.3672
11.2521	457.347	2.8242	3.1436	2.9964	3.5281	3.0229	3.2351	3.179	2.956	3.1107	3.1418	3.8899	4.1928	3.8904	4.1525	3.8625	4.2797	4.054	3.7884	4.0138	4.0539	3.1076	3.4242	3.2373	3.7226	3.2844	3.5346	3.4347	3.2484	3.3563	3.3896	3.3019	3.5528	3.4968	3.5441	3.4392	3.5377
11.2523	560.367	13.1193	15.23	13.4768	12.3546	13.0331	9.4811	12.8969	10.8855	12.5597	12.6853	12.3821	11.0744	10.8068	10.11	10.7986	10.461	10.9184	9.7231	10.7843	10.8921	12.9994	14.2569	12.8706	11.9058	12.6532	9.8278	12.5238	10.8525	12.1807	12.3018	13.9882	14.5501	15.5815	15.0549	14.6457	15.0654
11.2525	508.374	2.4628	3.5109	2.3405	1.7594	2.438	2.0401	2.3615	2.7846	2.4622	2.4868	3.7535	2.3302	2.5685	2.4014	3.0038	3.2226	3.702	2.685	2.9584	2.988	2.8012	3.2303	2.4099	1.9407	2.6203	2.3626	2.7276	2.8281	2.6013	2.6272	2.5899	2.5677	2.5791	2.3591	2.4987	2.5703
11.2602	576.4	0.9855	1.1306	1.2495	1.4783	1.2294	1.0374	0.969	0.7897	1.1087	1.1198	2.0438	1.7832	1.2252	1.1917	1.5591	1.5899	1.8826	1.5865	1.6078	1.6238	1.2577	1.301	1.2497	1.42	1.3327	1.1889	1.2119	1.0186	1.241	1.2533	1.113	1.0984	1.1813	1.17	1.1293	1.1616
11.2617	325.27	0.5312	0.7085	0.5316	0.7229	0.465	0.5705	0.5786	0.5659	0.5843	0.5901	0.7203	0.6363	0.732	0.6178	0.6724	0.777	0.7346	0.5858	0.6845	0.6914	0.5816	0.6938	0.5849	0.7033	0.5254	0.629	0.6243	0.5853	0.6129	0.619	0.6296	0.6745	0.6385	0.6624	0.6447	0.6632
11.2629	369.297	1.1516	1.3959	1.288	1.4601	1.2884	1.4666	1.4987	1.6421	1.3989	1.4129	1.709	1.6194	1.8395	1.734	1.7832	1.9885	1.8998	1.6943	1.7835	1.8013	1.2982	1.4593	1.4338	1.5445	1.4351	1.6147	1.6163	1.6969	1.5039	1.5188	1.3948	1.4626	1.3821	1.4525	1.4088	1.4491
11.2636	395.278	0.2581	0.1991	0.2039	0.2864	0.2695	0.2426	0.2068	0.2719	0.2423	0.2447	0.2493	0.3431	0.3243	0.2658	0.2556	0.2902	0.2923	0.2213	0.2802	0.283	0.2572	0.2365	0.2353	0.284	0.27	0.2572	0.2307	0.2654	0.2532	0.2557	0.2594	0.2696	0.2652	0.2633	0.2617	0.2692
11.2655	728.984	0.146	0.1919	0.1663	0.1317	0.1319	0.1687	0.1045	0.1399	0.1476	0.1491	0.1793	0.1585	0.1394	0.1269	0.1561	0.1376	0.1774	0.1551	0.1538	0.1553	0.1551	0.1844	0.1603	0.1318	0.1401	0.1625	0.1242	0.1474	0.15	0.1515	0.18	0.1374	0.1418	0.1285	0.1455	0.1496
11.27	538.385	22.0774	23.6439	21.3172	18.9895	21.3395	23.0178	21.1465	18.9304	21.3078	21.5209	24.5617	20.6133	20.9248	20.3099	21.8428	22.4071	23.2886	20.268	21.777	21.9948	22.8163	22.9969	21.3258	19.5161	21.7892	23.0969	21.9087	19.7548	21.5449	21.759	20.5031	22.3284	21.0943	22.4589	21.3802	21.9928
11.2717	706.972	0.2276	0.2613	0.2218	0.2116	0.1948	0.2523	0.2019	0.2269	0.2248	0.227	0.2373	0.2159	0.2214	0.2579	0.2678	0.2374	0.2239	0.2036	0.2332	0.2355	0.2312	0.2511	0.2228	0.2255	0.2165	0.2511	0.2096	0.2265	0.2281	0.2304	0.2547	0.2198	0.2104	0.2725	0.237	0.2437
11.2743	684.958	0.2741	0.3	0.3127	0.3289	0.2873	0.3653	0.2612	0.2594	0.2986	0.3016	0.3448	0.4349	0.3291	0.4246	0.3725	0.3828	0.3793	0.3824	0.3813	0.3851	0.2933	0.3356	0.3184	0.3566	0.3135	0.3735	0.294	0.2982	0.3212	0.3244	0.3393	0.3437	0.3053	0.3829	0.3394	0.3491
11.2759	673.965	0.1281	0.1529	0.1291	0.1494	0.0857	0.146	0.1717	0.13	0.1366	0.138	0.1276	0.1041	0.1954	0.1821	0.2066	0.1661	0.1661	0.138	0.1608	0.1624	0.1286	0.1413	0.1465	0.1592	0.1181	0.1526	0.172	0.1354	0.1435	0.1449	0.1859	0.1954	0.1792	0.1702	0.1808	0.186
11.2807	662.946	0.423	0.3907	0.4291	0.4237	0.3446	0.3753	0.3984	0.4209	0.4007	0.4047	0.5091	0.4953	0.4511	0.3966	0.5422	0.4835	0.5438	0.4685	0.4863	0.4911	0.4469	0.4191	0.4368	0.421	0.4007	0.4067	0.4396	0.4439	0.4246	0.4288	0.4377	0.4552	0.5249	0.4635	0.4656	0.479
11.2815	387.282	0.1347	0.116	0.0841	0.1591	0.1355	0.1564	0.1632	0.1849	0.1417	0.1432	0.2222	0.2451	0.2156	0.1904	0.2449	0.2099	0.2089	0.1881	0.2156	0.2178	0.1575	0.1492	0.1177	0.1687	0.1657	0.1716	0.1765	0.1904	0.1612	0.1628	0.2076	0.1665	0.2174	0.1695	0.1883	0.1937
11.2839	135.002	0.2263	0.3051	0.2142	0.2191	0.2535	0.2226	0.2805	0.2313	0.2441	0.2465	0.2629	0.2452	0.3114	0.2847	0.2142	0.3167	0.2928	0.2949	0.2779	0.2806	0.2367	0.2915	0.2398	0.238	0.2472	0.2489	0.2865	0.2538	0.254	0.2565	0.3381	0.3213	0.2876	0.3376	0.3179	0.327
11.2858	323.253	0.2101	0.1447	0.1517	0.1681	0.1598	0.1777	0.1473	0.1663	0.1657	0.1674	0.2447	0.2154	0.22	0.2433	0.2255	0.2492	0.2787	0.3034	0.2475	0.25	0.2199	0.1633	0.1697	0.189	0.1791	0.1978	0.1823	0.2064	0.1873	0.1892	0.317	0.3247	0.2797	0.2931	0.3006	0.3092
11.2864	629.941	0.2279	0.246	0.2145	0.2184	0.2685	0.2667	0.3087	0.259	0.2512	0.2537	0.2911	0.3285	0.2455	0.2588	0.263	0.3431	0.3496	0.2658	0.2932	0.2961	0.245	0.2681	0.2234	0.2309	0.2711	0.2889	0.3223	0.2673	0.2632	0.2658	0.2554	0.2328	0.2593	0.2552	0.2482	0.2553
11.2865	632.425	0.4807	0.403	0.3948	0.4594	0.486	0.4414	0.583	0.4533	0.4627	0.4673	0.6459	0.592	0.6479	0.7065	0.6554	0.5799	0.5838	0.5514	0.6204	0.6266	0.5248	0.4527	0.4607	0.527	0.5369	0.4812	0.5892	0.4904	0.5051	0.5101	0.6169	0.4967	0.6136	0.6176	0.5803	0.597
11.2866	640.932	0.4673	0.542	0.3863	0.5256	0.5899	0.5134	0.5296	0.467	0.5026	0.5077	0.6419	0.5641	0.6677	0.5482	0.5691	0.5991	0.717	0.541	0.606	0.6121	0.5138	0.5503	0.4593	0.5366	0.5934	0.5405	0.5828	0.4981	0.5316	0.5368	0.624	0.525	0.4902	0.6007	0.5544	0.5703
11.2884	643.415	0.7487	0.6783	0.6869	0.8406	0.7458	0.7193	0.688	0.831	0.7423	0.7497	1.4193	1.0671	1.3004	0.9702	1.0366	1.1853	1.0947	1.0338	1.1384	1.1498	0.9218	0.7799	0.8453	0.8821	0.8319	0.8455	0.7988	0.905	0.8466	0.855	0.6551	0.6981	0.7541	0.7925	0.7177	0.7383
11.2895	618.92	0.4967	0.5872	0.4776	0.4647	0.7019	0.4755	0.5384	0.5981	0.5425	0.5479	0.6242	0.5523	0.6233	0.5717	0.6975	0.6857	0.7134	0.5365	0.6256	0.6318	0.5314	0.5813	0.5168	0.4966	0.7113	0.534	0.5885	0.5969	0.5665	0.5722	0.5806	0.6031	0.6147	0.5824	0.5892	0.6061
11.2903	607.93	0.2527	0.3016	0.2158	0.2907	0.2199	0.3856	0.2961	0.2879	0.2813	0.2841	0.3176	0.2676	0.2863	0.323	0.3472	0.2977	0.2719	0.3074	0.3023	0.3054	0.2704	0.2945	0.2347	0.3018	0.256	0.3671	0.2929	0.3002	0.2882	0.291	0.3075	0.2749	0.3398	0.2598	0.2925	0.3009
11.2911	596.906	0.4991	0.6582	0.5517	0.4971	0.5126	0.4917	0.5709	0.5275	0.5386	0.544	0.7227	0.6334	0.6163	0.5587	0.6018	0.6406	0.6505	0.6403	0.633	0.6394	0.5581	0.6552	0.5708	0.5178	0.5433	0.5347	0.597	0.5703	0.5655	0.5711	0.6416	0.5163	0.5927	0.4719	0.5501	0.5658
11.2915	621.399	0.7261	1.0707	0.9179	0.971	0.9159	0.8066	0.8257	0.7371	0.8714	0.8801	1.0823	0.927	1.2311	0.9899	1.1828	1.3441	1.291	1.3194	1.171	1.1827	0.8197	1.0398	1.0016	0.9855	0.9984	0.9519	0.9528	0.9084	0.9519	0.9614	0.6761	0.9165	0.8864	1.0014	0.8614	0.8861
11.292	543.385	0.1815	0.2246	0.2448	0.2908	0.3117	0.2955	0.285	0.1998	0.2542	0.2568	0.2672	0.254	0.2868	0.2315	0.2938	0.2792	0.3042	0.3075	0.278	0.2808	0.2041	0.2331	0.2566	0.2786	0.3118	0.2944	0.2928	0.2331	0.2616	0.2642	0.266	0.2628	0.2022	0.2747	0.2489	0.256
11.2927	523.355	1.0969	1.3684	1.2019	1.2977	1.1553	1.2664	1.3745	1.4255	1.2733	1.2861	1.4995	1.6591	1.508	1.6662	1.8843	1.8755	1.7417	1.4454	1.66	1.6766	1.2041	1.4486	1.2853	1.4046	1.3603	1.4347	1.4822	1.4664	1.3781	1.3918	1.3672	1.4952	1.443	1.4892	1.4342	1.4753
11.2931	585.916	0.1985	0.2333	0.2306	0.2945	0.2125	0.2612	0.2485	0.246	0.2406	0.243	0.2926	0.2915	0.2629	0.3027	0.3288	0.2566	0.3603	0.281	0.2971	0.3	0.2233	0.2492	0.2399	0.2995	0.2456	0.2627	0.2796	0.2613	0.2562	0.2588	0.2988	0.2866	0.2905	0.278	0.2856	0.2938
11.2934	709.452	0.2411	0.2297	0.2794	0.2626	0.3034	0.2221	0.2592	0.3518	0.2687	0.2713	0.4839	0.3481	0.4463	0.4446	0.3073	0.5011	0.3973	0.4664	0.4244	0.4286	0.3036	0.2607	0.323	0.3116	0.309	0.2955	0.2971	0.3907	0.3095	0.3126	0.2537	0.3219	0.3481	0.354	0.3162	0.3253
11.2944	588.399	0.4268	0.3819	0.3966	0.3759	0.4604	0.5042	0.44	0.6411	0.4534	0.4579	0.5823	0.537	0.57	0.7126	0.5484	0.6581	0.5577	0.5496	0.5895	0.5954	0.4682	0.423	0.4424	0.4655	0.49	0.5486	0.4745	0.6331	0.4903	0.4952	0.478	0.4874	0.4702	0.5837	0.4998	0.5141
11.2948	599.389	0.9363	0.8761	0.8878	0.6221	0.7921	0.775	0.8878	0.6277	0.8006	0.8086	0.912	0.8188	1.0796	1.2599	0.9809	1.2269	1.5389	1.1543	1.1214	1.1326	0.9349	0.866	0.9407	0.791	0.8526	0.8982	1.063	0.7816	0.8862	0.895	0.729	0.7507	0.7231	1.0452	0.8039	0.8269
11.2949	350.301	0.3545	0.2737	0.2986	0.3753	0.3396	0.4649	0.394	0.2785	0.3474	0.3509	0.4258	0.4027	0.3612	0.3681	0.4151	0.3656	0.3606	0.284	0.3729	0.3766	0.3743	0.3076	0.3159	0.3772	0.3641	0.4443	0.3895	0.2869	0.3558	0.3593	0.2932	0.376	0.4438	0.3879	0.3715	0.3821
11.2965	328.32	0.3895	0.3759	0.3708	0.3415	0.4536	0.6174	0.5603	0.5335	0.4553	0.4599	0.4273	0.4657	0.3629	0.3788	0.5957	0.5091	0.412	0.4363	0.4485	0.453	0.401	0.4005	0.3707	0.3544	0.497	0.5961	0.5282	0.5213	0.4561	0.4606	0.381	0.4354	0.5246	0.5045	0.4568	0.4698
11.2967	594.418	0.1952	0.1812	0.2649	0.2467	0.2139	0.1943	0.2477	0.233	0.2221	0.2243	0.2459	0.1907	0.2319	0.2656	0.2417	0.2044	0.2658	0.3008	0.2434	0.2458	0.209	0.1845	0.2579	0.254	0.2243	0.1989	0.2548	0.2566	0.2287	0.231	0.1758	0.2405	0.2008	0.2467	0.2138	0.2199
11.2971	574.893	0.4525	0.4868	0.5216	0.4776	0.4793	0.431	0.4756	0.4578	0.4728	0.4775	0.4993	0.4513	0.5155	0.4576	0.5526	0.6069	0.6058	0.4392	0.516	0.5212	0.4666	0.4803	0.5227	0.4773	0.5054	0.4803	0.5137	0.4644	0.4863	0.4912	0.5021	0.4975	0.4069	0.4896	0.4693	0.4827
11.2978	587.407	0.2122	0.2806	0.2438	0.247	0.1916	0.2879	0.2449	0.1919	0.2375	0.2399	0.3062	0.3078	0.2538	0.2727	0.3022	0.3361	0.3488	0.2208	0.2936	0.2965	0.237	0.2889	0.2476	0.256	0.223	0.3031	0.2739	0.2043	0.253	0.2555	0.2339	0.2534	0.2324	0.2597	0.2424	0.2493
11.3017	670.48	0.3827	0.5458	0.383	0.4564	0.4769	0.5031	0.5231	0.4906	0.4702	0.4749	0.455	0.4996	0.4853	0.5529	0.5753	0.7065	0.605	0.5856	0.5582	0.5637	0.4029	0.5369	0.4108	0.4856	0.5094	0.5601	0.5493	0.5278	0.495	0.5	0.4911	0.4117	0.4295	0.422	0.4342	0.4466
11.302	324.286	0.3125	0.2188	0.303	0.393	0.3073	0.2804	0.3084	0.2541	0.2972	0.3002	0.3607	0.5072	0.409	0.3593	0.3521	0.4294	0.2675	0.3258	0.3764	0.3801	0.3263	0.2927	0.3313	0.3883	0.3234	0.3213	0.3011	0.2793	0.3189	0.322	0.4239	0.3618	0.3812	0.442	0.3982	0.4096
11.3026	615.45	0.7474	0.8139	0.6378	0.671	0.659	0.6383	0.7295	0.785	0.7102	0.7173	1.0709	0.598	0.5628	0.6427	0.6629	0.7406	0.7809	0.7084	0.7209	0.7281	0.8329	0.7635	0.6221	0.6705	0.6699	0.6709	0.7501	0.7845	0.7169	0.724	0.6028	0.563	0.5645	0.6416	0.587	0.6039
11.3034	665.423	1.2007	1.4072	1.2443	1.5869	1.0926	1.6028	1.6682	1.562	1.4206	1.4348	2.0093	1.7968	1.7904	1.8972	1.6738	1.8823	1.7615	1.6042	1.8019	1.82	1.411	1.5126	1.3885	1.6819	1.2586	1.6905	1.709	1.6121	1.5249	1.54	1.7223	1.5971	1.6478	1.6889	1.6474	1.6946
11.3038	1131.76	0.276	0.3188	0.2795	0.2905	0.2626	0.2937	0.2709	0.3332	0.2907	0.2936	0.2966	0.3564	0.3081	0.294	0.3445	0.3968	0.3319	0.3243	0.3316	0.3349	0.2826	0.3299	0.2881	0.2943	0.2876	0.323	0.2892	0.3392	0.3026	0.3056	0.2975	0.303	0.3286	0.2623	0.2949	0.3033
11.3039	217.067	0.2214	0.1891	0.2287	0.2779	0.2079	0.2623	0.2223	0.2051	0.2268	0.2291	0.3161	0.1749	0.1909	0.2297	0.2565	0.3003	0.26	0.2208	0.2437	0.2461	0.2464	0.1865	0.2203	0.2684	0.2235	0.2747	0.2342	0.2143	0.2323	0.2347	0.231	0.2343	0.2443	0.2023	0.2257	0.2322
11.3062	530.869	0.248	0.2483	0.1855	0.1972	0.2394	0.193	0.2542	0.189	0.2193	0.2215	0.2128	0.296	0.2003	0.1881	0.239	0.2621	0.3079	0.2133	0.2399	0.2423	0.2404	0.2616	0.1902	0.1969	0.2429	0.2126	0.2705	0.2001	0.2258	0.228	0.2257	0.2649	0.213	0.1885	0.2208	0.2271
11.3152	385.236	0.3493	0.3006	0.3252	0.4183	0.304	0.2895	0.3999	0.3467	0.3417	0.3451	0.4514	0.3484	0.4172	0.4408	0.4592	0.51	0.4592	0.3838	0.4338	0.4381	0.3768	0.3142	0.3501	0.4282	0.3485	0.3487	0.4191	0.3651	0.3669	0.3705	0.3904	0.3606	0.4009	0.4943	0.4074	0.4191
11.3163	501.368	0.4125	0.2834	0.2164	0.3587	0.3377	0.2794	0.3641	0.3224	0.3218	0.325	0.3877	0.4408	0.2662	0.4062	0.4615	0.4119	0.4717	0.3455	0.3989	0.4029	0.4083	0.3246	0.2301	0.3744	0.3746	0.3161	0.3953	0.3365	0.3431	0.3465	0.3016	0.2873	0.3502	0.3202	0.3117	0.3206
11.3201	999.678	0.4413	0.5279	0.5092	0.5087	0.4625	0.4606	0.5051	0.4986	0.4892	0.4941	0.5219	0.469	0.4878	0.5112	0.6599	0.5757	0.539	0.5043	0.5336	0.5389	0.4639	0.5157	0.5064	0.5144	0.5203	0.4947	0.5189	0.5126	0.5032	0.5082	0.4178	0.4964	0.4108	0.4882	0.4488	0.4616
11.3225	546.352	13.6151	12.2639	14.0371	11.8477	9.3641	10.0504	11.6896	11.0494	11.7397	11.8571	8.0321	6.1266	8.2377	5.869	7.394	5.8386	4.8359	5.2893	6.4529	6.5174	12.274	10.7756	12.6435	10.4416	8.9973	9.0785	10.0605	9.8136	10.4686	10.5727	6.4162	6.4091	6.1628	6.8656	6.3988	6.5821
11.3243	691.44	0.9575	0.772	0.8636	0.7928	0.7184	0.756	0.9209	0.7686	0.8187	0.8269	0.9557	0.8907	0.8356	0.9601	0.9796	1.0079	0.8504	0.7211	0.9001	0.9091	0.9619	0.8058	0.8609	0.8434	0.7964	0.828	0.9123	0.7753	0.8439	0.8522	0.671	0.8783	0.7743	0.7258	0.7547	0.7764
11.3264	955.649	0.5659	0.5327	0.5181	0.5071	0.4693	0.4872	0.659	0.5099	0.5312	0.5365	0.5556	0.6277	0.6473	0.5383	0.5975	0.5597	0.4807	0.5371	0.568	0.5737	0.5662	0.5594	0.5533	0.5201	0.5094	0.5107	0.6202	0.5298	0.5434	0.5488	0.4646	0.5737	0.5995	0.5207	0.5342	0.5495
11.3278	271.262	1.3036	1.1516	1.3751	1.4009	1.816	1.585	1.5318	1.1013	1.4082	1.4222	1.3043	1.6841	1.5628	1.5217	1.4486	1.4228	1.1484	0.9864	1.3849	1.3987	1.3104	1.2918	1.4294	1.4457	1.7486	1.5598	1.4496	1.0987	1.4101	1.4241	1.4753	1.3894	1.5614	1.6913	1.5141	1.5574
11.3287	257.247	0.664	0.461	0.4184	0.5354	0.3547	0.5026	0.4232	0.44	0.4749	0.4797	0.3599	0.4232	0.4973	0.4533	0.4504	0.3761	0.3652	0.3604	0.4107	0.4148	0.5906	0.4538	0.4404	0.5198	0.3847	0.4755	0.4127	0.4301	0.4613	0.4659	0.3908	0.357	0.4026	0.5014	0.4088	0.4205
11.3288	279.228	1.2737	1.2906	1.499	1.4265	1.1557	2.0269	1.6263	1.4451	1.468	1.4827	1.4941	1.6942	1.8032	1.6277	2.04	1.602	1.5177	1.2712	1.6313	1.6476	1.3358	1.399	1.5834	1.4921	1.4007	1.9392	1.6152	1.4356	1.5174	1.5325	1.7276	1.5553	1.6674	1.6372	1.6304	1.6771
11.3302	301.21	4.7946	4.5682	4.8791	6.0177	4.0456	5.5642	5.2224	5.0937	5.0232	5.0734	4.3024	4.3784	4.4204	4.257	4.6152	4.0645	3.5919	3.2447	4.1093	4.1504	4.6945	4.5431	4.7879	5.6289	4.253	5.2384	4.8597	4.7357	4.8201	4.868	4.4446	4.5147	4.4432	4.4528	4.4192	4.5458
11.3303	584.497	1.3142	0.917	0.7655	1.1569	1.2942	1.3237	1.0967	0.8389	1.0884	1.0993	1.1964	1.5592	0.95	1.494	1.0149	1.6934	1.3788	1.3498	1.3296	1.3429	1.2911	1.0837	0.816	1.2544	1.2417	1.4315	1.1799	0.994	1.1554	1.1669	1.3085	1.5287	1.3804	1.6677	1.4566	1.4983
11.3312	911.624	0.6099	0.6395	0.5652	0.7063	0.7055	0.6579	0.6137	0.6781	0.647	0.6535	0.6815	0.748	0.6912	0.8075	0.6073	0.7831	0.7288	0.7161	0.7204	0.7276	0.6311	0.6701	0.5999	0.7392	0.6908	0.6966	0.6493	0.705	0.6692	0.6758	0.5784	0.6629	0.6553	0.6723	0.6358	0.654
11.3355	413.265	0.7052	0.7722	0.8129	0.9579	0.6781	0.7502	0.6873	0.7751	0.7674	0.775	0.9325	0.9382	0.9619	1.1095	0.9129	1.0068	1.1469	0.9641	0.9966	1.0066	0.7662	0.818	0.8546	1.0061	0.7487	0.8233	0.8116	0.8441	0.8296	0.8378	1.0177	0.9118	0.9909	0.8961	0.9446	0.9716
11.3374	867.598	0.6844	0.6379	0.6748	0.771	0.7201	0.8082	0.726	0.7379	0.72	0.7272	0.8634	0.7308	0.7583	0.9306	0.8859	0.9764	1.0621	0.832	0.8799	0.8887	0.7331	0.6645	0.6993	0.8194	0.7736	0.8594	0.8191	0.781	0.7645	0.7721	0.6631	0.7971	0.7436	0.7475	0.7304	0.7514
11.3447	823.571	0.6943	0.6878	0.6428	0.7498	0.8726	0.8142	0.8465	0.7442	0.7565	0.7641	1.0108	0.9242	0.9406	0.8627	1.0134	1.0075	0.8768	1.1148	0.9689	0.9785	0.7777	0.7509	0.7212	0.7861	0.9219	0.8718	0.8629	0.8601	0.8144	0.8225	0.8688	0.8783	0.789	0.7628	0.8165	0.8399
11.3535	423.337	0.4712	0.388	0.4338	0.61	0.7046	0.6356	0.502	0.6717	0.5521	0.5576	0.6156	0.6103	0.6522	0.4704	0.5573	0.6284	0.5236	0.7265	0.598	0.604	0.51	0.4461	0.4911	0.5805	0.6772	0.6402	0.5126	0.7029	0.5668	0.5724	0.8377	0.8268	0.7974	0.7993	0.8071	0.8303
11.3563	397.252	0.2621	0.2411	0.3403	0.2509	0.2559	0.3585	0.4341	0.3507	0.3117	0.3148	0.3169	0.4631	0.3433	0.452	0.2849	0.328	0.322	0.3573	0.3584	0.362	0.2773	0.2984	0.3428	0.3047	0.2672	0.3544	0.4099	0.3612	0.3252	0.3285	0.3511	0.3634	0.4443	0.4319	0.3937	0.405
11.3571	779.544	0.8497	0.8283	0.7782	0.7663	0.7775	0.7614	0.7909	0.8468	0.7999	0.8079	0.9272	0.934	0.8737	0.8578	1.0654	1.0249	1.0259	0.8057	0.9393	0.9487	0.8736	0.8591	0.8062	0.7973	0.8633	0.8364	0.8589	0.8572	0.8396	0.8479	0.7799	0.8242	0.8553	0.8376	0.816	0.8394
11.3582	730.566	0.3785	0.3773	0.2972	0.3839	0.3458	0.276	0.3381	0.362	0.3449	0.3483	0.3697	0.2753	0.306	0.338	0.4088	0.4333	0.3789	0.3138	0.353	0.3565	0.3782	0.3534	0.3009	0.376	0.3672	0.3189	0.352	0.3584	0.3488	0.3523	0.4154	0.3899	0.3538	0.3512	0.3738	0.3845
11.3598	735.518	0.8208	0.7857	0.8365	0.8884	0.7633	0.7988	0.9948	1.0372	0.8657	0.8743	1.02	1.0276	0.907	1.0675	1.0769	1.2149	1.1188	1.1865	1.0774	1.0882	0.8752	0.8507	0.8585	0.943	0.8555	0.9131	1.0366	1.1023	0.924	0.9332	1.048	1.0383	0.9727	0.8961	0.9789	1.0069
11.3599	477.352	0.17	0.2205	0.2957	0.2739	0.2427	0.2007	0.2333	0.3281	0.2456	0.2481	0.3012	0.3057	0.356	0.1975	0.2952	0.2633	0.241	0.2465	0.2758	0.2786	0.204	0.2431	0.3124	0.2572	0.2599	0.2187	0.2376	0.3149	0.2546	0.2571	0.2166	0.2641	0.2333	0.2701	0.2436	0.2505
11.3715	455.337	0.5291	0.6601	0.6053	0.6598	0.4303	0.4813	0.5567	0.543	0.5582	0.5638	0.7884	0.5316	0.7675	0.8466	0.5221	0.7131	0.6059	0.6415	0.6771	0.6839	0.5973	0.631	0.6493	0.714	0.4604	0.5453	0.5749	0.5824	0.5914	0.5972	0.5164	0.6639	0.7344	0.4925	0.5958	0.6129
11.3716	449.362	0.2474	0.3522	0.2564	0.3612	0.3356	0.3562	0.3662	0.3364	0.3265	0.3297	0.3979	0.3587	0.3268	0.3777	0.3323	0.4196	0.4037	0.3726	0.3737	0.3774	0.2867	0.3556	0.2755	0.369	0.3398	0.376	0.3795	0.3543	0.3402	0.3436	0.3927	0.368	0.3457	0.2977	0.3475	0.3575
11.3753	647.467	0.6633	0.9482	0.9523	1.0429	0.9019	1.0626	0.9895	0.9564	0.9396	0.949	1.2009	1.1242	1.2509	1.1885	1.2438	1.2318	1.3155	1.1641	1.215	1.2271	0.8024	0.9974	1.0325	1.0905	1.0035	1.1166	1.0828	1.0348	1.0145	1.0245	0.8182	0.9386	1.15	0.8218	0.9228	0.9493
11.3779	642.506	0.4957	0.4651	0.4244	0.3408	0.5217	0.3908	0.476	0.4599	0.4468	0.4513	0.4181	0.3598	0.4494	0.3709	0.3846	0.5076	0.4164	0.3956	0.4128	0.4169	0.4786	0.4408	0.4329	0.3519	0.4942	0.4246	0.4657	0.4545	0.4407	0.4451	0.4988	0.3436	0.4342	0.4197	0.4198	0.4319
11.3814	747.569	0.247	0.2335	0.2938	0.3671	0.2791	0.2925	0.2803	0.2802	0.2842	0.287	0.3147	0.2566	0.2672	0.2442	0.31	0.41	0.2756	0.2313	0.2887	0.2916	0.2653	0.2405	0.2886	0.3394	0.2912	0.3255	0.282	0.2744	0.2869	0.2898	0.3387	0.267	0.2416	0.2477	0.271	0.2788
11.385	419.313	0.2481	0.2856	0.1828	0.2349	0.2776	0.3153	0.2481	0.2629	0.2569	0.2595	0.3363	0.218	0.2424	0.3179	0.2807	0.2131	0.2812	0.2332	0.2654	0.268	0.2716	0.27	0.1988	0.2584	0.2826	0.2924	0.2591	0.2617	0.2605	0.2631	0.226	0.2562	0.2826	0.1963	0.2379	0.2447
11.3853	471.362	1.3118	1.7596	1.3432	1.5481	1.4322	1.5913	1.7144	1.46	1.5201	1.5353	1.7287	1.6066	1.6616	1.8462	1.9568	1.9718	1.8088	1.6174	1.7747	1.7925	1.4237	1.7298	1.4304	1.6396	1.5888	1.7046	1.756	1.5378	1.5929	1.6087	1.4093	1.6699	1.554	1.4538	1.5065	1.5497
11.3854	598.482	0.4782	0.5385	0.4466	0.4707	0.4214	0.4169	0.5253	0.5986	0.487	0.4919	0.4517	0.4377	0.4499	0.4308	0.4602	0.5338	0.4965	0.4743	0.4669	0.4715	0.4739	0.5157	0.4497	0.4652	0.4377	0.451	0.5233	0.5809	0.4846	0.4895	0.5581	0.4476	0.4392	0.5027	0.482	0.4958
11.3875	421.322	0.2619	0.3221	0.2942	0.4772	0.3292	0.3878	0.4412	0.2946	0.351	0.3545	0.433	0.2968	0.4546	0.4198	0.4054	0.4513	0.31	0.3932	0.3955	0.3995	0.3064	0.3173	0.3362	0.4673	0.3538	0.408	0.4122	0.3278	0.3642	0.3678	0.3302	0.3657	0.4074	0.3824	0.3677	0.3782
11.3877	603.442	1.1208	1.1603	1.2145	1.2906	1.0943	1.3048	1.2498	1.1724	1.2009	1.2129	1.2842	1.6072	1.4196	1.4573	1.6059	1.7554	1.5458	1.3468	1.5028	1.5178	1.1677	1.2789	1.2724	1.346	1.2425	1.4331	1.3381	1.2475	1.2839	1.2967	1.3893	1.1479	1.3854	1.2897	1.29	1.327
11.3888	341.302	1.0528	0.7396	1.05	1.3983	0.9276	1.175	0.9878	1.1295	1.0576	1.0682	1.0203	0.9306	0.9283	0.852	0.9955	0.9414	0.8695	1.0169	0.9443	0.9538	1.0499	0.7915	1.0246	1.273	0.959	1.1274	0.9677	1.1282	1.0348	1.0451	0.8592	0.8399	0.7275	0.8706	0.8161	0.8394
11.3891	679.438	2.4637	2.6945	3.4157	3.0214	2.7359	3.673	3.0803	2.7939	2.9848	3.0146	3.6522	3.9017	3.9626	3.961	3.3417	3.3637	3.0494	3.3804	3.5766	3.6124	2.7763	3.0128	3.5711	3.2912	2.9329	3.6316	3.1038	3.0177	3.151	3.1823	3.5529	3.7608	3.7391	3.8214	3.6814	3.7868
11.3903	359.314	1.6941	1.1638	1.6062	2.298	1.532	1.671	1.6908	1.5176	1.6467	1.6632	1.536	1.6088	1.5197	1.3455	1.6974	1.5182	1.6798	1.5265	1.554	1.5695	1.6627	1.282	1.5925	2.0781	1.5976	1.6491	1.7052	1.5579	1.6324	1.6486	1.5043	1.2843	1.4959	1.5485	1.4437	1.485
11.3921	559.408	1.3266	1.3664	1.2943	1.3095	1.3165	1.2843	1.3139	1.432	1.3304	1.3437	1.8161	1.5511	1.6329	1.6508	1.6993	1.6869	1.6741	1.6475	1.6698	1.6865	1.4569	1.4199	1.3863	1.4096	1.4348	1.4001	1.4192	1.5244	1.4236	1.4378	1.6966	1.4284	1.4157	1.5706	1.5125	1.5559
11.3932	327.226	2.6333	2.8513	2.5192	3.3674	2.4201	2.9709	2.9943	2.5259	2.7853	2.8132	2.4935	2.7738	2.3345	2.4179	2.2453	2.2988	2.1665	2.1582	2.3611	2.3847	2.6113	2.846	2.4853	3.159	2.4114	2.8298	2.8137	2.4925	2.6936	2.7203	2.5449	2.5069	2.5902	2.4801	2.5052	2.577
11.3933	365.301	2.3378	2.0232	2.3293	2.9453	2.3953	3.2042	3.7065	3.0259	2.7459	2.7734	2.1293	2.5142	2.8745	2.99	2.2279	2.0605	2.0076	1.7541	2.3198	2.343	2.297	2.1573	2.4787	2.9862	2.3881	2.9451	3.3109	2.7677	2.6535	2.6799	2.5479	2.6037	2.4574	2.5475	2.5137	2.5858
11.3937	515.39	1.3399	1.4597	1.4335	1.4903	1.3061	1.3956	1.5271	1.6129	1.4456	1.4601	1.6632	1.6131	1.652	1.5789	1.718	1.9078	1.6032	1.416	1.644	1.6605	1.4283	1.5057	1.4959	1.5278	1.4318	1.5405	1.5621	1.6015	1.5038	1.5188	1.4951	1.5396	1.6031	1.5708	1.5366	1.5807
11.3938	305.246	2.4964	2.9887	3.0088	3.9436	2.8956	3.8419	3.6655	4.6567	3.4372	3.4715	5.1096	5.8452	5.5493	5.4263	4.4185	4.0797	4.2805	4.8965	4.9507	5.0002	3.1689	3.7249	3.6655	4.3611	3.3312	3.9418	3.8598	4.8361	3.8389	3.877	4.8267	4.7228	5.1159	4.8893	4.8398	4.9785
11.3958	761.587	1.4969	1.6824	1.5569	1.9749	1.8541	1.7775	1.7689	1.6376	1.7187	1.7358	1.7905	2.1951	1.857	2.0185	2.0809	2.0751	1.9053	1.5696	1.9365	1.9559	1.5786	1.8203	1.6405	2.0058	1.9403	1.8716	1.8217	1.6607	1.7833	1.801	1.3987	1.4954	1.4424	1.4714	1.4375	1.4786
11.3976	565.374	0.2206	0.1759	0.2813	0.2739	0.2396	0.2791	0.3304	0.3565	0.2697	0.2724	0.3523	0.4052	0.4025	0.4242	0.3067	0.3049	0.4088	0.2617	0.3583	0.3619	0.255	0.2347	0.3133	0.315	0.2605	0.2885	0.3538	0.3405	0.2936	0.2965	0.2289	0.3033	0.3042	0.2043	0.2576	0.265
11.3984	617.473	0.9483	1.0325	0.8865	1.1508	1.0207	1.2945	1.2114	0.9839	1.0661	1.0767	1.3808	1.2118	0.9602	0.9178	0.9371	0.9789	1.095	0.9525	1.0543	1.0648	1.0623	1.0829	0.9096	1.1029	1.0145	1.2272	1.1941	1.0003	1.069	1.0796	0.8666	1.0414	0.8911	0.9431	0.9262	0.9527
11.3994	878.619	0.8979	0.965	0.878	0.9055	0.8904	0.8198	0.7961	0.843	0.8745	0.8832	0.9798	0.8631	0.7742	0.6761	0.7664	0.6888	0.7019	0.6887	0.7674	0.775	0.9231	0.9441	0.8562	0.8561	0.8718	0.7947	0.7802	0.8236	0.8523	0.8607	0.7896	0.8629	0.8073	0.7279	0.789	0.8116
11.4	425.302	0.6663	0.4764	0.4916	0.6329	0.5729	0.7087	0.6305	0.5597	0.5924	0.5983	0.6227	0.8095	0.6773	0.7664	0.6788	0.7089	0.6412	0.6497	0.6943	0.7013	0.6587	0.5629	0.541	0.6733	0.6088	0.716	0.6397	0.5973	0.6214	0.6276	0.6072	0.6545	0.658	0.6339	0.632	0.6501
11.4057	350.304	0.9606	0.6855	0.966	1.1675	0.8622	1.0057	0.7321	0.7895	0.8961	0.9051	0.91	1.5273	1.4501	1.397	1.2612	1.3836	0.9444	1.3182	1.274	1.2867	0.9527	0.9015	1.0931	1.2377	0.9779	1.1124	0.7937	0.948	0.9966	1.0065	1.0973	1.1179	1.1609	1.1997	1.1325	1.165
11.4062	427.338	0.9337	1.0936	0.9699	1.1268	0.9398	1.2692	1.224	1.0516	1.0761	1.0868	1.4179	1.0617	1.2174	1.2695	1.2148	1.2511	1.331	1.1004	1.233	1.2453	1.0607	1.091	1.0373	1.1745	1.0247	1.2775	1.2638	1.0907	1.1217	1.1329	1.1299	1.0925	1.0101	1.2804	1.1169	1.1489
11.4064	377.244	0.9281	0.8273	1.0867	1.1691	0.8576	1.1594	0.9158	0.858	0.9753	0.985	0.7161	1.1527	1.1863	1.0599	1.146	0.9946	0.9827	1.0828	1.0401	1.0505	0.8793	0.9136	1.1173	1.1529	0.9447	1.1292	0.9422	0.9385	0.9971	1.007	0.8867	0.844	0.8426	0.9015	0.86	0.8847
11.4367	665.453	1.1603	1.207	1.3203	1.4896	1.2845	1.4188	1.5207	1.4963	1.3622	1.3758	1.7353	1.6476	1.5875	1.6007	1.6405	1.6186	1.7189	1.4062	1.6194	1.6356	1.3114	1.3243	1.3944	1.5328	1.3954	1.4842	1.5868	1.5101	1.4348	1.449	1.3675	1.4533	1.1962	1.4147	1.3443	1.3829
11.4384	299.271	0.1796	0.2469	0.2197	0.2027	0.1979	0.2316	0.1866	0.2088	0.2092	0.2113	0.2428	0.2095	0.2552	0.2281	0.2308	0.2699	0.2963	0.2136	0.2433	0.2457	0.1965	0.2387	0.2298	0.2112	0.2093	0.2437	0.2165	0.2153	0.219	0.2212	0.2168	0.2369	0.244	0.1948	0.2209	0.2272
11.4452	688.497	0.7145	0.8592	0.7455	0.8158	0.7752	0.7611	0.884	0.7176	0.7841	0.792	0.674	0.7238	0.936	0.7682	0.8455	0.9118	0.9354	0.9473	0.8428	0.8512	0.7079	0.8293	0.7974	0.8118	0.8049	0.8073	0.9061	0.7958	0.8033	0.8113	0.9164	0.9394	1.0325	1.0139	0.9658	0.9935
11.4453	693.453	3.2196	3.5257	3.4306	4.5948	3.6798	4.0364	4.7959	4.0339	3.9146	3.9537	5.1613	5.178	5.1096	5.1364	5.6059	5.5472	5.1137	4.6874	5.1924	5.2444	3.7262	3.9605	3.8719	4.7789	4.231	4.463	4.9259	4.3063	4.2594	4.3017	5.1664	5.1298	5.2908	5.2471	5.1564	5.3042
11.4537	298.307	0.1694	0.2136	0.1944	0.1723	0.2127	0.2171	0.1613	0.1667	0.1884	0.1903	0.2228	0.1345	0.1698	0.2036	0.2245	0.1839	0.2331	0.1755	0.1935	0.1954	0.1837	0.1947	0.1892	0.182	0.2189	0.2108	0.1813	0.1732	0.1908	0.1927	0.2314	0.242	0.1675	0.2022	0.2087	0.2146
11.4561	379.281	0.8842	1.1064	1.0909	1.0709	1.0557	1.1952	1.3706	0.8724	1.0808	1.0916	1.1379	1.1199	1.287	1.1836	1.3614	1.2498	1.1337	1.0986	1.1965	1.2085	0.9527	1.1153	1.1459	1.1103	1.1503	1.2213	1.3242	0.9536	1.116	1.1271	1.0328	1.0882	1.0475	1.0838	1.0524	1.0826
11.4597	578.416	4.0837	4.4029	4.1844	3.919	4.3914	3.0059	3.5358	3.2761	3.8499	3.8884	5.3427	4.5124	3.5328	3.3497	4.9661	4.7648	4.9642	3.9014	4.4168	4.4609	4.4223	4.4526	4.041	3.813	4.6053	3.4853	3.9363	3.5221	4.0146	4.0545	3.7714	3.6243	3.5222	3.7299	3.6253	3.7292
11.4623	535.454	0.1924	0.2265	0.2684	0.2952	0.2843	0.2795	0.2651	0.2401	0.2564	0.259	0.221	0.2052	0.2385	0.2914	0.2894	0.2655	0.2938	0.1974	0.2503	0.2528	0.2006	0.2223	0.2622	0.2972	0.2899	0.2788	0.2751	0.2349	0.2563	0.2589	0.1973	0.2335	0.2553	0.3041	0.2451	0.2521
11.4725	315.231	0.305	0.3761	0.3354	0.448	0.3402	0.2785	0.3767	0.3635	0.3529	0.3565	0.3222	0.2664	0.3457	0.3673	0.2747	0.3474	0.3341	0.2821	0.3175	0.3207	0.3109	0.3503	0.3397	0.4319	0.3284	0.2989	0.3697	0.3512	0.3459	0.3494	0.3452	0.3489	0.3132	0.3456	0.3348	0.3444
11.4862	822.5	0.8622	1.171	1.0508	0.9592	0.8725	1.2398	1.1143	1.1977	1.0584	1.069	1.0423	1.1754	1.1622	0.8557	1.2561	1.3309	1.3052	0.7761	1.113	1.1241	0.912	1.178	1.0842	0.9424	0.9844	1.2757	1.1744	1.117	1.0781	1.0888	1.0318	1.0663	0.9079	0.9404	0.9767	1.0047
11.4894	249.182	0.175	0.21	0.2447	0.2017	0.2352	0.156	0.217	0.2567	0.212	0.2142	0.2515	0.1882	0.2167	0.2068	0.2329	0.3231	0.2535	0.1881	0.2326	0.2349	0.1952	0.2055	0.2389	0.205	0.2381	0.2002	0.2285	0.2451	0.2184	0.2206	0.2278	0.1994	0.2551	0.1932	0.2167	0.2229
11.4906	351.251	0.7382	0.652	0.9724	0.8174	0.77	0.9841	1.1979	0.8163	0.8685	0.8772	1.2655	1.5377	1.35	1.3704	1.0747	1.1716	0.9982	0.9184	1.2108	1.2229	0.8751	0.8789	1.0727	0.9666	0.86	1.042	1.1592	0.8635	0.9599	0.9694	1.037	0.9245	1.0162	0.9536	0.973	1.0009
11.5159	691.417	1.3896	1.8442	1.4727	1.711	1.2999	1.4247	1.5405	1.4054	1.511	1.5261	1.7513	1.6148	1.7761	1.6266	1.7492	1.5781	1.8193	1.3173	1.6541	1.6706	1.488	1.7955	1.5568	1.7066	1.4351	1.4784	1.6273	1.4174	1.5556	1.571	1.2574	1.4048	1.2745	1.3983	1.3204	1.3582
11.5195	413.265	24.6471	35.9584	29.1947	28.3586	25.5466	28.5397	27.1727	29.255	28.5841	28.8699	35.7689	32.5992	33.0771	31.1645	32.853	33.7321	31.6753	26.695	32.1956	32.5176	27.5801	35.29	30.3226	29.3577	27.8112	30.1555	28.5986	29.3144	29.656	29.9507	26.4163	24.8799	25.4433	25.6671	25.3456	26.0719
11.5206	279.158	1.2898	2.0016	1.6889	1.933	1.3177	1.5275	1.2748	1.5173	1.5688	1.5845	1.5968	1.7952	1.5817	1.6365	1.4316	1.658	1.607	1.2438	1.5688	1.5845	1.3738	1.9595	1.6704	1.8767	1.3668	1.5764	1.3726	1.4834	1.5775	1.5932	1.0524	1.258	1.1722	1.3146	1.1873	1.2213
11.5235	803.54	18.7092	23.8514	24.254	25.1284	20.0197	23.5072	20.8751	34.8006	23.8932	24.1321	34.7318	30.1946	31.5849	29.4473	29.2624	31.8883	26.1239	23.4919	29.5906	29.8865	22.8498	25.5723	26.2277	26.481	22.7	25.8851	22.4271	32.7021	25.4663	25.7193	18.5905	18.2075	18.9654	18.8795	18.4741	19.0035
11.524	429.239	0.6002	0.7901	0.6561	0.7298	0.6394	0.64	0.564	0.6313	0.6564	0.6629	1.3297	1.1562	1.1451	1.1039	1.288	1.1226	0.9667	0.9645	1.1346	1.1459	0.7874	0.8865	0.7829	0.8325	0.816	0.7696	0.6725	0.7345	0.7809	0.7887	1.0699	1.083	1.0398	1.0755	1.0564	1.0866
11.5254	149.022	2.7976	4.0841	3.3239	3.5048	2.6316	2.6811	2.4852	2.6072	3.0144	3.0446	2.3583	2.3733	2.4219	2.3081	2.2279	2.5739	2.4792	2.014	2.3446	2.368	2.7008	3.6725	3.1129	3.2347	2.5671	2.6811	2.509	2.5167	2.8619	2.8903	2.3256	1.9565	2.1124	2.2862	2.1485	2.21
11.5258	391.283	23.2653	34.0107	26.5107	28.7224	23.7086	23.4824	22.405	21.9213	25.5033	25.7583	27.2536	24.9682	27.115	27.1823	25.4337	29.4964	25.1663	21.5109	26.0158	26.276	24.3899	31.8975	26.7972	28.6169	24.5084	25.2562	23.338	22.3616	25.7747	26.0308	22.506	21.3216	19.7437	21.3336	21.014	21.6161
11.5259	113.131	0.1904	0.3174	0.2391	0.2593	0.2044	0.2127	0.2461	0.2391	0.2386	0.2409	0.2639	0.235	0.2807	0.305	0.2753	0.2805	0.2109	0.2098	0.2576	0.2602	0.2099	0.2982	0.2508	0.2735	0.2257	0.2322	0.2396	0.2374	0.2447	0.2471	0.1827	0.1709	0.1793	0.1901	0.1789	0.1841
11.526	167.033	0.8454	1.2008	0.964	0.8867	0.8395	0.8771	0.8093	1.05	0.9341	0.9434	0.8565	0.8403	0.8051	0.818	0.848	0.86	0.7933	0.7125	0.8167	0.8249	0.8525	1.1158	0.9287	0.878	0.8543	0.8817	0.8135	0.9877	0.9096	0.9187	0.7329	0.6182	0.631	0.5014	0.6147	0.6323
11.5261	71.0842	0.1593	0.3089	0.2288	0.2422	0.224	0.2235	0.1969	0.2425	0.2283	0.2305	0.2434	0.1638	0.3113	0.2249	0.2211	0.2114	0.1945	0.168	0.2173	0.2195	0.1813	0.2738	0.2508	0.2402	0.2266	0.2227	0.1983	0.229	0.2268	0.229	0.1903	0.1847	0.166	0.2198	0.1883	0.1937
11.5265	261.147	0.519	0.8481	0.7164	0.754	0.6153	0.6265	0.5472	0.6872	0.6642	0.6709	0.8403	0.7052	0.894	0.7701	0.7627	0.7728	0.7045	0.6188	0.7586	0.7661	0.6028	0.8163	0.7649	0.7656	0.6625	0.6702	0.5929	0.6864	0.6918	0.6986	0.499	0.4999	0.5092	0.5606	0.512	0.5267
11.5272	163.038	0.5161	0.8028	0.6276	0.6909	0.5255	0.5282	0.49	0.6068	0.5985	0.6045	0.6926	0.5676	0.5929	0.6525	0.5459	0.5205	0.4904	0.4541	0.5646	0.5702	0.5633	0.7474	0.622	0.688	0.5386	0.5316	0.4951	0.5819	0.5932	0.5991	0.3234	0.2469	0.3264	0.2872	0.293	0.3014
11.5273	1033.57	16.7925	17.8448	16.3806	19.7301	17.0408	13.8033	17.1575	16.2521	16.8752	17.044	16.463	21.2186	17.6543	19.4973	20.3917	17.8968	20.1145	17.2459	18.8103	18.9984	16.7941	18.7859	16.785	19.868	18.1593	14.9884	18.0869	16.9193	17.4582	17.6317	18.0727	18.2734	18.8053	18.9297	18.3351	18.8604
11.5279	1028.61	0.447	0.3682	0.3388	0.4501	0.331	0.3094	0.3638	0.3938	0.3753	0.379	0.2977	0.3564	0.3534	0.2723	0.3198	0.2284	0.3334	0.2898	0.3064	0.3095	0.4116	0.3671	0.3442	0.4093	0.3331	0.2919	0.3598	0.3763	0.3599	0.3635	0.2812	0.3244	0.3836	0.3199	0.324	0.3333
11.5286	638.335	2.9315	2.7204	2.7508	3.3474	2.4236	2.2333	2.8695	3.1069	2.7979	2.8259	1.983	2.6632	2.096	2.4164	2.6359	2.19	2.6867	2.3057	2.3721	2.3958	2.7068	2.7196	2.5993	3.1435	2.5146	2.245	2.8521	2.9743	2.7058	2.7327	2.728	2.7306	3.085	2.8498	2.8199	2.9007
11.5289	621.309	11.1913	10.7457	11.294	12.9358	12.0103	9.0605	11.9665	11.4982	11.3378	11.4512	9.5886	12.3286	10.3585	12.024	13.2092	10.4489	12.8301	11.3423	11.5163	11.6314	10.8431	11.1991	11.1148	12.8326	12.4992	9.5071	12.3089	11.7447	11.446	11.5597	13.1446	12.5052	13.1098	12.4166	12.6661	13.029
11.529	659.264	0.3052	0.2792	0.2428	0.2798	0.2991	0.23	0.3676	0.3557	0.2949	0.2979	0.3403	0.5644	0.3721	0.4469	0.5026	0.3896	0.4958	0.4375	0.4437	0.4481	0.3156	0.3526	0.2767	0.3252	0.356	0.2731	0.4041	0.3861	0.3342	0.3375	0.6573	0.5897	0.6443	0.6408	0.6267	0.6447
11.5294	755.309	0.1315	0.0986	0.0927	0.0909	0.1315	0.0956	0.1093	0.0989	0.1061	0.1072	0.1113	0.1416	0.0983	0.1382	0.1239	0.1112	0.1453	0.1044	0.1218	0.123	0.1271	0.11	0.0946	0.1039	0.1315	0.1006	0.1196	0.1028	0.1107	0.1118	0.1243	0.1307	0.1414	0.12	0.1278	0.1315
11.5305	681.344	0.3696	0.29	0.3114	0.3644	0.3161	0.331	0.3646	0.2665	0.3267	0.33	0.291	0.4966	0.2939	0.3683	0.392	0.3118	0.4792	0.4081	0.3801	0.3839	0.3516	0.3436	0.3086	0.369	0.3404	0.3295	0.3976	0.3103	0.342	0.3454	0.359	0.3365	0.3545	0.3646	0.3501	0.3601
11.5309	447.169	0.2458	0.216	0.2014	0.3159	0.2107	0.1802	0.2358	0.2364	0.2303	0.2326	0.2249	0.3017	0.2662	0.2244	0.3081	0.2479	0.2553	0.2429	0.2589	0.2615	0.2418	0.2387	0.2188	0.2957	0.2389	0.1993	0.2432	0.244	0.2388	0.2412	0.2258	0.2643	0.2079	0.2564	0.2362	0.243
11.5342	643.291	7.4487	6.0613	6.6916	7.5613	7.9655	7.6488	8.0386	6.0529	7.1836	7.2554	6.1889	8.3774	6.8054	7.6463	9.2115	6.9118	9.2975	7.1562	7.6994	7.7764	7.1682	6.6764	6.7541	7.6586	8.4058	7.5388	8.4418	6.4938	7.3539	7.427	8.7239	8.6868	8.5501	8.3971	8.5036	8.7472
11.5345	921.443	0.563	0.4763	0.4357	0.5094	0.4756	0.3845	0.5734	0.3577	0.472	0.4767	0.4776	0.4609	0.4004	0.4794	0.5003	0.4211	0.5462	0.4022	0.461	0.4656	0.5443	0.4748	0.429	0.5068	0.4891	0.3978	0.5723	0.3783	0.4718	0.4765	0.5201	0.5283	0.6015	0.479	0.5269	0.542
11.5472	1013.6	1.0322	0.9015	0.8354	1.571	1.4116	1.2437	1.2508	1.1012	1.1684	1.1801	1.3699	1.974	1.6694	2.0733	2.2353	2.0208	2.3481	1.707	1.9247	1.944	1.1227	1.1768	1.0502	1.7148	1.6449	1.4546	1.5435	1.2878	1.3661	1.3797	1.4197	1.3248	1.5474	1.4527	1.4218	1.4625
11.5478	551.389	0.3625	0.3538	0.3261	0.3268	0.4936	0.4729	0.2493	0.3562	0.3677	0.3713	0.4639	0.4221	0.5482	0.6345	0.4316	0.4835	0.4431	0.3718	0.4748	0.4796	0.3899	0.3728	0.3838	0.4085	0.485	0.4804	0.3013	0.3692	0.3968	0.4007	0.4003	0.2686	0.3125	0.3379	0.3265	0.3359
11.555	783.572	3.2351	3.6428	3.3996	5.0249	3.2294	4.0735	4.0899	3.5379	3.7791	3.8169	6.0985	5.3357	5.9405	5.8822	5.8983	5.7316	5.5564	4.7244	5.646	5.7024	3.9745	4.0885	4.0584	5.2938	3.9651	4.5381	4.5057	3.9378	4.272	4.3145	4.0211	3.9199	3.8902	3.8966	3.8926	4.0042
11.5587	259.189	0.4127	0.4978	0.4417	0.4794	0.4234	0.4467	0.4625	0.3584	0.4403	0.4447	0.5384	0.5134	0.5834	0.5423	0.5662	0.4842	0.5597	0.5373	0.5406	0.546	0.4465	0.5042	0.4797	0.5002	0.4665	0.4608	0.492	0.4143	0.4681	0.4728	0.5186	0.5232	0.3978	0.4816	0.4755	0.4891
11.5592	763.601	1.3537	1.2389	1.2411	2.0381	1.1286	1.374	1.6481	1.3836	1.4258	1.44	2.37	2.3017	2.3508	2.385	2.413	2.4522	2.3878	1.9574	2.3272	2.3505	1.6172	1.5135	1.5276	2.1469	1.4763	1.6631	1.8536	1.5688	1.6616	1.6781	1.867	1.8139	1.7294	1.8116	1.7874	1.8386
11.5632	241.178	0.1365	0.1164	0.1166	0.1533	0.157	0.1114	0.1325	0.1242	0.131	0.1323	0.2542	0.164	0.1973	0.1841	0.1637	0.2119	0.214	0.2061	0.1994	0.2014	0.1669	0.129	0.1376	0.1627	0.1611	0.1382	0.1546	0.1488	0.149	0.1505	0.1527	0.1303	0.1432	0.1803	0.1501	0.1544
11.568	371.315	5.6001	5.4516	6.6131	5.4911	5.4405	5.8367	6.4062	5.1701	5.7512	5.8087	7.4974	6.9347	7.0084	7.3154	8.0068	7.5501	8.0125	6.3096	7.3294	7.4027	6.1075	5.8533	6.7463	6.0112	6.1829	6.3334	6.8813	5.5985	6.1821	6.2435	7.3511	6.6518	6.9032	6.8822	6.8776	7.0747
11.5693	393.296	15.0661	11.9199	11.3722	11.8654	11.8315	13.0412	14.3009	12.4326	12.7287	12.856	16.9763	15.3833	16.8451	16.0649	18.7107	17.7104	17.9228	15.2878	16.8627	17.0313	15.6246	12.854	12.8117	13.0549	13.7804	14.3654	15.3708	13.4929	13.8445	13.982	16.3265	16.2832	16.2574	15.8512	16.0178	16.4768
11.5745	671.449	0.7161	0.697	0.8287	0.6491	0.7473	1.0302	0.9238	0.6936	0.7857	0.7936	1.0055	1.0085	0.8699	0.7508	0.8811	0.8993	0.8533	0.7071	0.8719	0.8807	0.7928	0.7791	0.8433	0.6815	0.793	1.0073	0.9152	0.7145	0.8119	0.82	0.7627	0.7531	0.7631	0.7932	0.7603	0.7821
11.5748	566.417	0.7871	0.8352	0.7558	0.5468	0.8172	0.7674	0.6297	0.6036	0.7179	0.725	0.8521	0.6549	0.6358	0.6549	0.6787	0.8824	0.7621	0.7199	0.7301	0.7374	0.8075	0.7939	0.7293	0.5798	0.7938	0.8046	0.6699	0.6492	0.7249	0.7321	0.6136	0.6196	0.6496	0.6196	0.6193	0.6371
11.5853	257.245	0.2888	0.196	0.2858	0.3327	0.1737	0.2602	0.2601	0.2618	0.2574	0.26	0.2417	0.2444	0.2507	0.3006	0.3587	0.3553	0.3246	0.2415	0.2897	0.2926	0.2784	0.2092	0.2784	0.3278	0.2239	0.2871	0.2792	0.263	0.267	0.2696	0.1923	0.2583	0.2617	0.1863	0.2224	0.2288
11.5945	774.562	0.768	0.83	0.8007	0.7693	0.8532	0.8917	0.8213	0.8829	0.8271	0.8354	1.2771	1.4093	1.3259	1.2964	1.1019	1.3037	1.4394	0.9094	1.2579	1.2705	0.9004	0.9804	0.9374	0.9114	0.93	1.0059	0.9874	0.9119	0.9406	0.95	3.0712	3.4516	3.4631	3.5009	3.338	3.4336
11.663	312.325	0.7198	0.7217	0.5947	0.735	0.5864	0.6751	0.6381	0.7422	0.6766	0.6834	0.708	0.6875	0.7054	0.6738	0.7355	0.7507	0.9135	0.7652	0.7425	0.7499	0.7205	0.7167	0.6257	0.7267	0.6336	0.7013	0.7149	0.7668	0.697	0.704	0.822	0.9043	0.8441	0.8478	0.846	0.8702
11.6702	451.373	0.9736	0.9736	0.8934	0.7587	0.9908	1.0086	0.9494	1.026	0.9468	0.9562	0.9731	0.9026	1.0892	0.8528	1.0065	0.9938	1.0738	0.8617	0.9692	0.9789	0.9784	0.9605	0.9474	0.7903	1.0097	1.0151	0.9908	1.0085	0.9577	0.9672	0.9618	0.9731	0.7833	1.0395	0.93	0.9567
11.6705	334.307	1.8375	1.9161	1.652	1.6773	1.5408	1.6957	1.7199	1.5843	1.703	1.72	1.8834	2.2004	2.1137	2.2338	1.8483	1.6022	1.625	1.5021	1.8761	1.8949	1.8584	1.9975	1.7769	1.836	1.6431	1.6892	1.7132	1.6023	1.7562	1.7736	2.2098	2.4451	2.5907	2.1488	2.3251	2.3917
11.6717	707.47	0.68	0.6108	0.9291	0.8179	0.7411	0.9832	0.8239	0.737	0.7904	0.7983	1.0386	0.9761	1.2313	1.2931	1.1168	0.9599	0.8853	0.8728	1.0467	1.0572	0.774	0.7061	1.0101	0.9473	0.849	0.9873	0.848	0.7911	0.8596	0.8681	0.9852	1.0312	1.1331	1.1421	1.0622	1.0926
11.678	523.36	0.2884	0.2725	0.2448	0.1691	0.2737	0.3136	0.306	0.2463	0.2643	0.2669	0.2401	0.3113	0.3082	0.259	0.2666	0.2701	0.2665	0.2389	0.2701	0.2728	0.2777	0.2837	0.262	0.1937	0.276	0.3057	0.299	0.2505	0.2672	0.2699	0.2141	0.2695	0.2526	0.2904	0.2541	0.2614
11.679	329.242	4.0821	4.0997	3.9461	4.6354	3.8786	4.4573	4.1204	4.1473	4.1709	4.2126	3.4418	3.5752	4.0368	3.587	3.5381	3.2859	2.9886	3.0973	3.4438	3.4783	3.941	3.9878	3.9889	4.4144	3.8491	4.204	3.8737	3.9754	4.0103	4.0501	3.451	3.4237	3.4331	3.6957	3.4659	3.5652
11.6792	635.493	0.9818	0.9018	0.9113	0.9928	0.8945	1.1305	0.9125	0.9683	0.9617	0.9713	0.8224	0.8652	0.7718	0.8521	0.8588	0.7342	0.7586	0.775	0.8048	0.8128	0.9465	0.8971	0.8807	0.9668	0.8987	1.0409	0.8826	0.9418	0.9274	0.9366	0.7538	0.6958	0.7994	0.7572	0.744	0.7654
11.6793	306.276	0.2204	0.2365	0.2448	0.2459	0.2697	0.2816	0.2443	0.2906	0.2542	0.2568	0.3482	0.2832	0.3696	0.3025	0.3235	0.3203	0.3004	0.2297	0.3097	0.3128	0.2538	0.2495	0.2776	0.2628	0.2876	0.2943	0.2611	0.2819	0.2697	0.2723	0.3293	0.2677	0.2929	0.2699	0.2871	0.2953
11.6797	941.747	0.3021	0.3025	0.274	0.3505	0.2946	0.2965	0.273	0.2465	0.2925	0.2954	0.2308	0.2785	0.183	0.2037	0.2393	0.2538	0.1942	0.2498	0.2291	0.2314	0.2856	0.298	0.2524	0.3166	0.2848	0.2886	0.2557	0.2535	0.2781	0.2808	0.224	0.1975	0.2116	0.2865	0.2276	0.2341
11.6798	307.26	1.0471	0.9555	1.2596	0.9563	1.0949	1.3258	1.2661	1.2574	1.1453	1.1568	1.4656	1.5626	1.5039	1.5567	1.3541	1.3484	1.2017	1.3057	1.4123	1.4265	1.1581	1.1136	1.3277	1.119	1.1781	1.3451	1.2626	1.3015	1.2192	1.2313	1.3154	1.2114	1.2371	1.1668	1.2203	1.2553
11.6816	546.352	3.4391	3.0353	3.2013	2.8232	3.0541	2.6603	3.1063	2.9183	3.0297	3.06	1.8544	1.7056	2.1549	1.9552	1.7933	1.8591	1.6678	1.5229	1.8142	1.8323	3.0563	2.7147	2.9532	2.6301	2.7753	2.4831	2.771	2.625	2.7393	2.7666	2.111	2.2638	2.0045	2.1457	2.1099	2.1704
11.6817	299.292	0.2755	0.2651	0.2609	0.2994	0.3574	0.3095	0.3162	0.2683	0.294	0.297	0.3624	0.4014	0.46	0.4003	0.3802	0.3926	0.3145	0.2781	0.3737	0.3774	0.2988	0.3008	0.3125	0.3281	0.3686	0.3339	0.319	0.2776	0.3158	0.3189	0.4412	0.4289	0.3551	0.3554	0.3912	0.4024
11.6824	566.32	0.4138	0.4545	0.3382	0.3803	0.4263	0.3933	0.4098	0.339	0.3944	0.3983	0.302	0.2498	0.2344	0.2405	0.2942	0.243	0.2721	0.2215	0.2572	0.2598	0.3877	0.4051	0.3137	0.3485	0.3987	0.359	0.3789	0.3166	0.3619	0.3655	0.2613	0.2371	0.2347	0.2697	0.2482	0.2553
11.6858	449.363	0.3362	0.1891	0.2733	0.3496	0.3119	0.2942	0.2732	0.3211	0.2936	0.2965	0.3181	0.3076	0.4645	0.3909	0.3863	0.3001	0.3189	0.3791	0.3582	0.3618	0.3333	0.22	0.323	0.3636	0.3357	0.2987	0.2876	0.3444	0.3115	0.3146	0.3124	0.2404	0.3233	0.32	0.296	0.3045
11.6867	365.279	1.0064	1.1069	0.9807	1.2193	0.9767	1.2103	1.0816	1.045	1.0784	1.0891	1.4854	1.5121	1.3745	1.5154	1.794	1.6657	1.5814	1.3199	1.5311	1.5464	1.1324	1.2147	1.0851	1.307	1.2018	1.3388	1.2201	1.1433	1.1988	1.2107	1.2773	1.2759	1.1892	1.3509	1.2606	1.2967
11.6869	761.587	1.1188	1.1004	1.1588	1.2834	1.1034	1.0812	1.1954	1.1682	1.1512	1.1627	1.2214	1.239	1.2953	1.299	1.1877	1.2345	1.1796	1.1265	1.2229	1.2351	1.1504	1.1409	1.1991	1.3002	1.1417	1.1313	1.2036	1.1865	1.1757	1.1874	1.1053	0.9232	1.0754	1.2175	1.0695	1.1002
11.6881	409.327	0.7575	0.7006	0.7393	0.7092	0.623	0.9485	0.7249	0.7453	0.7435	0.751	0.7961	0.7978	0.7977	0.8169	0.8239	0.8927	0.7087	0.6954	0.7912	0.7991	0.7711	0.7286	0.7578	0.7438	0.6841	0.9439	0.7282	0.7508	0.7597	0.7673	0.9644	0.8063	0.8676	0.8262	0.8575	0.882
11.6882	1112.76	0.2793	0.2908	0.3578	0.2865	0.3708	0.3457	0.3704	0.3808	0.3353	0.3386	0.2552	0.2206	0.1995	0.3394	0.2836	0.3157	0.2759	0.2109	0.2626	0.2652	0.2746	0.2745	0.3196	0.3029	0.3539	0.3416	0.3501	0.3457	0.3188	0.3219	0.2446	0.2371	0.3138	0.2607	0.2614	0.2689
11.6886	820.544	0.722	0.6682	0.6496	0.7753	0.9266	0.9751	0.9105	1.1283	0.8445	0.8529	0.6529	0.9443	0.7918	0.9523	0.7259	0.8169	1.0111	0.6431	0.8173	0.8255	0.7082	0.7413	0.6888	0.8282	0.8888	0.9447	0.9455	1.0291	0.8423	0.8507	3.7994	3.861	4.0476	3.7824	3.8339	3.9437
11.6887	794.528	0.3513	0.3895	0.3943	0.4392	0.3547	0.4296	0.3396	0.3146	0.3766	0.3804	0.6241	0.7237	0.5708	0.5973	0.6666	0.705	0.7744	0.6194	0.6602	0.6668	0.422	0.4758	0.4409	0.4839	0.4403	0.5042	0.454	0.4025	0.4504	0.4548	0.441	0.6303	0.4864	0.5132	0.5125	0.5272
11.6888	806.505	14.5773	15.0168	14.9196	16.3038	15.343	17.1624	15.4134	12.9846	15.2151	15.3673	13.5318	15.3547	13.7501	15.0239	14.4649	15.5179	15.6085	12.5621	14.4767	14.6215	14.3869	15.1772	14.6996	16.1405	15.347	16.918	15.6205	13.1983	15.1131	15.2633	13.8427	14.172	14.667	14.8288	14.2338	14.6417
11.6892	219.173	0.9084	1.0736	1.2006	1.1362	1.1161	1.4326	1.1123	1.1064	1.1358	1.1471	0.9345	1.0875	0.9094	1.1012	0.9158	1.1626	1.3226	0.9805	1.0518	1.0623	0.9196	1.0825	1.1331	1.1386	1.0813	1.3783	1.1773	1.101	1.1209	1.132	1.4266	1.2944	1.318	1.4762	1.365	1.4041
11.6893	801.55	4.7407	4.7307	4.8735	5.0365	4.9732	5.2959	4.8249	3.4125	4.736	4.7833	3.6656	4.2818	3.5271	3.9995	3.8075	4.1469	4.428	3.6026	3.9324	3.9717	4.4932	4.641	4.5581	4.8224	4.7476	5.0568	4.7729	3.5477	4.5592	4.6045	4.5465	4.6894	4.8506	4.9684	4.7161	4.8512
11.6897	822.481	0.8189	0.7935	0.8503	0.9122	0.7782	0.9361	1.0048	0.8328	0.8659	0.8745	1.2488	1.0759	1.1117	1.1886	1.0579	1.1814	1.0871	0.9152	1.1083	1.1194	0.9316	0.8688	0.9206	0.9918	0.8619	1.0082	1.036	0.8753	0.932	0.9412	1.3516	1.3341	1.2754	1.3783	1.3215	1.3594
11.694	420.344	0.6582	0.5621	0.5338	0.6802	0.5178	0.558	0.5931	0.5259	0.5786	0.5844	0.7014	0.7317	0.4988	0.6503	0.6997	0.5579	0.6519	0.5296	0.6277	0.6339	0.6724	0.6077	0.5277	0.6794	0.5724	0.5637	0.6142	0.54	0.5942	0.6002	0.4447	0.6898	0.5373	0.5442	0.5485	0.5642
11.7097	338.341	13.0179	10.9689	10.1543	13.2005	12.3243	12.0508	13.0988	13.5974	12.3016	12.4246	11.4491	11.5356	11.2572	11.9868	17.1989	13.1892	11.8809	9.5035	12.2502	12.3727	12.6875	11.1668	10.4841	13.023	13.7644	12.4642	12.9218	12.8627	12.357	12.4798	14.9845	16.4316	17.7827	15.654	16.0511	16.511
11.7146	376.299	0.2145	0.232	0.1761	0.2697	0.1762	0.1718	0.1792	0.1903	0.2012	0.2032	0.2552	0.2745	0.3162	0.2884	0.3469	0.2753	0.2483	0.2392	0.2805	0.2833	0.2259	0.2439	0.2124	0.2772	0.2228	0.2	0.1987	0.2079	0.2224	0.2246	0.6855	0.5994	0.7274	0.6541	0.6599	0.6788
11.7277	471.103	1.2732	1.5097	1.3401	1.2075	1.198	1.0867	1.2646	1.3078	1.2735	1.2862	1.2643	1.149	1.3044	1.315	1.1423	1.1991	1.4006	1.3365	1.2639	1.2765	1.2774	1.4262	1.3379	1.247	1.2016	1.1265	1.3122	1.348	1.2781	1.2908	1.2213	1.178	1.1299	1.1157	1.1496	1.1826
11.7298	705.983	0.1978	0.2031	0.1299	0.1855	0.1658	0.2351	0.2391	0.2429	0.1999	0.2019	0.2105	0.1786	0.2135	0.2784	0.1782	0.2046	0.3018	0.1657	0.2164	0.2186	0.202	0.1979	0.1517	0.211	0.1715	0.2297	0.2575	0.2287	0.2052	0.2072	0.2192	0.1988	0.1892	0.143	0.1857	0.191
11.7309	407.312	3.253	3.9505	3.3678	3.4917	3.1274	4.1827	3.6284	3.5235	3.5656	3.6013	3.7018	4.1894	4.8895	4.6801	4.2709	3.8702	4.1358	3.2306	4.121	4.1622	3.3828	4.0306	3.7691	3.8297	3.4688	4.1457	3.7949	3.5347	3.7259	3.7629	3.4222	3.5057	3.6944	3.6267	3.5266	3.6277
11.7313	744.642	0.2061	0.204	0.1885	0.2534	0.2056	0.1772	0.1887	0.1631	0.1983	0.2003	0.1858	0.2592	0.2012	0.2195	0.1813	0.1942	0.1935	0.1972	0.204	0.206	0.202	0.219	0.1927	0.2473	0.2024	0.1833	0.1919	0.1761	0.2009	0.2029	0.2134	0.2517	0.2249	0.202	0.2208	0.2271
11.7334	686.456	0.2244	0.244	0.2484	0.253	0.3703	0.3216	0.2991	0.2751	0.2795	0.2823	0.2918	0.3337	0.3544	0.2665	0.3029	0.4081	0.4209	0.309	0.3359	0.3393	0.2426	0.2679	0.2765	0.259	0.3585	0.3469	0.3332	0.2909	0.2953	0.2982	0.3489	0.2895	0.3406	0.2521	0.3047	0.3134
11.7353	683.969	0.2119	0.2209	0.205	0.2191	0.1755	0.2161	0.3026	0.2394	0.2238	0.2261	0.288	0.2415	0.2454	0.2039	0.3447	0.2912	0.3072	0.2594	0.2727	0.2754	0.2322	0.2272	0.2162	0.2174	0.2217	0.2375	0.3069	0.2506	0.2374	0.2398	0.2222	0.254	0.2192	0.2935	0.2448	0.2518
11.7429	661.956	0.2107	0.2585	0.2984	0.31	0.2746	0.2496	0.2906	0.2093	0.2627	0.2653	0.2775	0.2558	0.2802	0.2594	0.2773	0.2619	0.3768	0.1969	0.2732	0.276	0.2286	0.2591	0.2953	0.3002	0.2794	0.2553	0.3156	0.2113	0.2668	0.2695	0.2675	0.247	0.299	0.2399	0.2607	0.2682
11.7663	617.93	0.2397	0.2976	0.2425	0.3194	0.2672	0.2712	0.3021	0.3172	0.2821	0.2849	0.2968	0.307	0.3011	0.3007	0.3768	0.3468	0.4416	0.2112	0.3228	0.326	0.2553	0.3015	0.2585	0.3178	0.2994	0.2933	0.3408	0.2973	0.294	0.2969	0.2555	0.2451	0.257	0.2876	0.2587	0.2661
11.7735	798.564	0.1735	0.1789	0.2031	0.3034	0.2674	0.2533	0.2323	0.2162	0.2285	0.2308	0.3459	0.2949	0.2555	0.3084	0.2422	0.3418	0.3755	0.2497	0.3017	0.3048	0.2179	0.2091	0.2174	0.3077	0.2649	0.2785	0.2712	0.2304	0.2483	0.2508	0.7254	0.8885	0.6664	0.7197	0.7425	0.7638
11.7746	595.917	0.2959	0.2497	0.2693	0.2832	0.3006	0.2935	0.3448	0.2824	0.2899	0.2928	0.3525	0.2862	0.2727	0.2751	0.2764	0.3269	0.3279	0.2723	0.2988	0.3017	0.3117	0.2602	0.2715	0.284	0.2989	0.305	0.344	0.2868	0.2938	0.2967	0.316	0.284	0.2527	0.2726	0.2785	0.2865
11.7799	673.525	0.4863	0.4154	0.5336	0.5427	0.6372	0.5819	0.5926	0.4737	0.5329	0.5383	0.5051	0.439	0.474	0.4486	0.5489	0.4926	0.4562	0.4347	0.4749	0.4796	0.4935	0.4234	0.5212	0.5241	0.624	0.5651	0.5639	0.4753	0.5212	0.5264	0.446	0.466	0.4416	0.5394	0.4685	0.4819
11.7859	573.904	0.2123	0.211	0.2736	0.2354	0.2455	0.2409	0.3219	0.234	0.2468	0.2493	0.2279	0.2475	0.211	0.2063	0.2812	0.2902	0.2994	0.2095	0.2466	0.2491	0.2173	0.2213	0.2592	0.2303	0.2584	0.2559	0.3194	0.2334	0.2481	0.2506	0.2297	0.2453	0.248	0.1945	0.2271	0.2336
11.7875	493.348	0.3285	0.4101	0.2872	0.4366	0.3594	0.2849	0.3257	0.4988	0.3664	0.3701	0.6762	0.4748	0.5392	0.6787	0.4878	0.6083	0.5386	0.4793	0.5604	0.566	0.418	0.4285	0.3523	0.5027	0.3979	0.3703	0.3833	0.5062	0.4175	0.4216	0.4394	0.4564	0.4545	0.4436	0.444	0.4567
11.7876	606.448	3.2079	3.5053	3.1238	2.3582	3.3371	2.9232	2.3006	2.2511	2.8759	2.9047	4.4024	3.523	3.0371	2.9054	3.7393	3.9437	4.3436	3.5017	3.6745	3.7113	3.5257	3.5273	3.1177	2.5213	3.4907	3.2134	2.8452	2.6357	3.0938	3.1245	2.6144	2.6902	2.7523	2.6277	2.6444	2.7202
11.8106	529.878	0.1708	0.1925	0.1732	0.1984	0.1908	0.1959	0.1463	0.1887	0.1821	0.1839	0.1603	0.1577	0.1692	0.1708	0.1677	0.1806	0.1925	0.1518	0.1688	0.1705	0.169	0.1847	0.1731	0.1933	0.1877	0.194	0.1596	0.1837	0.1797	0.1815	0.1742	0.1516	0.1886	0.124	0.158	0.1625
11.8217	407.312	0.3492	0.3331	0.3553	0.2924	0.31	0.2944	0.2813	0.3163	0.3165	0.3197	0.3484	0.3476	0.3879	0.4089	0.406	0.5076	0.3255	0.3282	0.3825	0.3863	0.3508	0.3384	0.3653	0.325	0.3394	0.3518	0.2955	0.3273	0.335	0.3383	0.2504	0.2183	0.2824	0.262	0.2507	0.2579
11.8227	507.866	0.1239	0.1505	0.1241	0.1318	0.1442	0.1394	0.1363	0.1341	0.1355	0.1369	0.1773	0.1625	0.1588	0.1379	0.1119	0.1272	0.1575	0.1094	0.1428	0.1442	0.138	0.1543	0.1335	0.1347	0.138	0.1377	0.1431	0.131	0.1381	0.1395	0.1374	0.1142	0.0934	0.128	0.1171	0.1204
11.8326	859.603	0.3604	0.3548	0.3396	0.4471	0.3324	0.3862	0.3679	0.3573	0.3682	0.3719	0.5458	0.4568	0.4309	0.394	0.5749	0.5152	0.4165	0.3474	0.4602	0.4648	0.409	0.3823	0.3644	0.438	0.3998	0.423	0.3841	0.3636	0.3935	0.3974	0.3601	0.4197	0.3899	0.3407	0.3738	0.3845
11.8358	424.333	0.4453	0.369	0.3489	0.4437	0.3849	0.4924	0.4799	0.3875	0.419	0.4231	0.6524	0.5237	0.5592	0.4934	0.5623	0.5225	0.5626	0.4424	0.5398	0.5452	0.4998	0.4099	0.4038	0.4608	0.4364	0.5051	0.5059	0.4116	0.4518	0.4563	0.3951	0.4312	0.4441	0.4223	0.4189	0.4309
11.839	719.451	0.3233	0.2828	0.2827	0.2951	0.3174	0.2335	0.3447	0.3119	0.2989	0.3019	0.4745	0.4076	0.3677	0.3082	0.3647	0.4738	0.4279	0.3105	0.3919	0.3958	0.3631	0.3157	0.3056	0.3014	0.3343	0.2972	0.3694	0.3193	0.3241	0.3273	0.3936	0.349	0.3265	0.3171	0.3431	0.3529
11.8432	379.316	0.5047	0.3697	0.4079	0.4116	0.3634	0.504	0.3566	0.4284	0.4183	0.4225	0.4862	0.3913	0.5142	0.4113	0.447	0.529	0.5039	0.3652	0.456	0.4606	0.5026	0.377	0.4368	0.4156	0.3904	0.5155	0.3978	0.4225	0.4301	0.4344	0.4395	0.3892	0.5638	0.4821	0.464	0.4773
11.8505	419.314	2.1297	2.2524	2.3646	2.0848	2.1024	2.2102	2.2683	2.3262	2.2173	2.2395	2.4261	2.3653	2.0744	2.4016	2.4834	2.642	2.6809	2.1563	2.4038	2.4278	2.2153	2.2922	2.3033	2.1864	2.232	2.3429	2.3967	2.3398	2.2768	2.2994	1.8593	1.8089	1.9163	1.9111	1.8552	1.9083
11.8507	493.349	1.2623	1.3606	1.2578	1.535	1.1546	1.286	1.2463	1.2463	1.2936	1.3065	1.5204	1.4562	1.5757	1.6758	1.7858	1.6109	1.6997	1.4975	1.6028	1.6188	1.3339	1.3915	1.3444	1.5863	1.3345	1.382	1.3747	1.3434	1.379	1.3927	1.3511	1.2288	1.4581	1.4303	1.3534	1.3922
11.8514	441.296	4.3653	4.5596	4.8669	4.3264	3.9428	3.5461	4.25	4.674	4.3164	4.3596	5.6751	5.1049	4.4419	4.5081	5.9505	6.1726	6.2274	5.3555	5.4295	5.4838	4.7181	4.7201	4.7842	4.416	4.5189	4.2523	4.7978	4.9697	4.6218	4.6677	4.0487	4.0599	4.2805	4.029	4.0635	4.1799
11.8523	488.392	0.4425	0.4286	0.4571	0.4792	0.4255	0.4711	0.4991	0.5759	0.4724	0.4771	0.4914	0.4919	0.5509	0.4292	0.4766	0.4593	0.4346	0.4088	0.4678	0.4725	0.4571	0.4467	0.4831	0.4712	0.445	0.4729	0.4877	0.5464	0.4739	0.4786	0.4567	0.3356	0.5412	0.4641	0.4449	0.4577
11.8534	478.387	0.3391	0.3033	0.2965	0.353	0.4068	0.3303	0.3241	0.305	0.3323	0.3356	0.3811	0.3286	0.3444	0.3375	0.3611	0.415	0.3913	0.34	0.3624	0.366	0.3514	0.3112	0.3101	0.3526	0.4011	0.3553	0.3446	0.3218	0.3417	0.3451	0.3454	0.3095	0.3471	0.299	0.322	0.3312
11.8609	483.343	2.3033	2.3646	2.2771	2.1749	2.8223	2.476	2.5013	2.2596	2.3974	2.4214	2.9309	2.7351	3.0054	2.7277	3.0265	2.7505	3.1382	2.4226	2.8421	2.8705	2.4734	2.47	2.4725	2.3376	2.9172	2.5713	2.6893	2.3589	2.5231	2.5482	2.5653	2.4993	2.5246	2.4365	2.4814	2.5525
11.8772	411.325	0.4448	0.4046	0.3528	0.3766	0.415	0.4261	0.4482	0.4284	0.4121	0.4162	0.4369	0.4746	0.4466	0.4583	0.5173	0.5396	0.5563	0.4825	0.489	0.4939	0.4451	0.4243	0.3783	0.4012	0.4476	0.4594	0.4804	0.4533	0.4338	0.4381	0.3592	0.3214	0.3714	0.4067	0.361	0.3714
11.8918	433.311	0.5719	0.6482	0.6255	0.88	0.6427	0.7235	0.7574	0.6365	0.6857	0.6926	1.1378	1.0531	0.9869	1.1046	1.1484	1.0794	1.0183	0.986	1.0643	1.075	0.7177	0.7537	0.7199	0.9461	0.7826	0.8217	0.8317	0.7442	0.7852	0.793	0.745	0.8031	0.8818	0.8992	0.824	0.8476
11.8952	383.333	0.2536	0.2387	0.3337	0.3042	0.2984	0.2297	0.2439	0.2653	0.2709	0.2736	0.2717	0.2798	0.2445	0.1743	0.3122	0.2722	0.3936	0.2524	0.2751	0.2778	0.2595	0.2503	0.3129	0.2741	0.3064	0.2429	0.2846	0.2685	0.2735	0.2762	0.2056	0.2352	0.2661	0.2772	0.2436	0.2505
11.919	684.555	0.2283	0.1778	0.1906	0.197	0.1828	0.1778	0.2142	0.17	0.1923	0.1942	0.179	0.1579	0.1507	0.2051	0.1775	0.2373	0.1439	0.1696	0.1776	0.1794	0.217	0.1737	0.1815	0.201	0.1842	0.1948	0.1985	0.1741	0.1897	0.1916	0.1593	0.1927	0.1934	0.1837	0.1805	0.1856
11.9344	640.531	0.2351	0.1918	0.2086	0.2316	0.2337	0.2443	0.2527	0.1383	0.217	0.2192	0.2231	0.1829	0.2337	0.1904	0.2324	0.2195	0.1874	0.1817	0.2064	0.2085	0.2333	0.1905	0.216	0.2234	0.2369	0.2405	0.2386	0.1532	0.2155	0.2177	0.2433	0.2174	0.1995	0.1637	0.2039	0.2098
11.9527	601.461	0.3054	0.3213	0.4	0.2904	0.3869	0.4329	0.3829	0.3544	0.3593	0.3629	0.4441	0.4028	0.4286	0.351	0.4476	0.5771	0.553	0.4207	0.4531	0.4576	0.342	0.3435	0.4092	0.3088	0.4083	0.4741	0.4302	0.3807	0.385	0.3888	0.2956	0.3482	0.3319	0.2734	0.3092	0.318
11.9556	492.401	0.4709	0.4675	0.3753	0.4266	0.5162	0.478	0.3922	0.35	0.4346	0.4389	0.4428	0.4519	0.3683	0.4256	0.5216	0.4877	0.4489	0.3882	0.4419	0.4463	0.4662	0.4659	0.3754	0.4306	0.5253	0.4854	0.4107	0.3688	0.4388	0.4432	0.417	0.4663	0.3858	0.3976	0.4125	0.4243
11.9594	497.358	0.9088	1.0241	0.9993	0.9162	1.0294	0.8854	0.9682	0.891	0.9528	0.9623	1.2616	1.1973	1.0438	1.0789	1.2832	1.2918	1.1819	0.9662	1.1631	1.1747	1.0025	1.073	1.0156	0.9669	1.1102	0.9981	1.0326	0.933	1.0113	1.0213	0.9607	0.9451	0.9718	0.9136	0.9383	0.9652
11.9632	557.438	0.2959	0.3364	0.302	0.3299	0.3007	0.2547	0.3584	0.2958	0.3092	0.3123	0.4248	0.3894	0.3508	0.3774	0.4819	0.4604	0.5218	0.4638	0.4338	0.4381	0.3299	0.3515	0.3158	0.3453	0.3519	0.3098	0.4037	0.3473	0.3424	0.3458	0.3976	0.3643	0.3991	0.3824	0.382	0.3929
11.9852	455.312	0.4492	0.39	0.3152	0.4511	0.3243	0.3285	0.3424	0.3555	0.3695	0.3732	0.5189	0.4316	0.3554	0.5326	0.5238	0.4421	0.4691	0.4683	0.4677	0.4724	0.4691	0.4025	0.3269	0.4764	0.3805	0.3608	0.3782	0.394	0.3964	0.4003	0.3929	0.3409	0.3359	0.2859	0.3355	0.3451
11.9879	513.411	0.459	0.3529	0.3456	0.3793	0.3479	0.3611	0.4014	0.303	0.3688	0.3725	0.5294	0.4891	0.4161	0.3657	0.4732	0.5028	0.4627	0.3965	0.4544	0.459	0.4791	0.3891	0.3651	0.3796	0.3854	0.4009	0.4211	0.3351	0.3925	0.3964	0.3668	0.4279	0.3479	0.4375	0.3911	0.4023
11.9906	752.52	0.299	0.2199	0.2581	0.3676	0.307	0.3296	0.3563	0.3667	0.313	0.3162	0.3183	0.3636	0.3179	0.2499	0.2745	0.3797	0.2448	0.2121	0.2951	0.2981	0.3054	0.2573	0.2745	0.3413	0.3032	0.3457	0.3315	0.3353	0.3102	0.3133	0.284	0.2976	0.3326	0.3097	0.3029	0.3116
11.9939	399.346	0.7126	0.7847	0.7448	0.6345	0.8419	0.8387	0.6644	0.6876	0.7387	0.746	0.7151	0.7755	0.7098	0.708	0.7455	0.9407	0.7303	0.6913	0.752	0.7595	0.7168	0.7863	0.7397	0.6596	0.8297	0.8733	0.688	0.7058	0.7461	0.7536	0.6864	0.6327	0.5866	0.6554	0.6339	0.652
11.9943	421.328	2.2989	2.5099	2.2374	2.2254	3.0632	2.3766	2.34	2.2286	2.41	2.4341	2.7494	3.0303	2.6546	3.0485	3.0658	3.2692	3.2202	2.6177	2.957	2.9865	2.4243	2.6539	2.3541	2.4575	3.1098	2.6286	2.5884	2.3865	2.5617	2.5871	2.123	2.0433	2.2921	2.2801	2.1628	2.2248
12.0018	379.28	0.2527	0.2155	0.2431	0.311	0.2597	0.2248	0.3194	0.2626	0.2611	0.2637	0.2965	0.3822	0.4494	0.4044	0.3047	0.2935	0.3179	0.302	0.3438	0.3473	0.265	0.2587	0.2964	0.3379	0.2752	0.2446	0.3223	0.2795	0.2835	0.2863	0.3271	0.3632	0.3129	0.4061	0.3488	0.3588
12.0046	476.405	0.2524	0.2458	0.1716	0.2224	0.184	0.1816	0.2156	0.1611	0.2043	0.2064	0.226	0.1789	0.1634	0.2426	0.2168	0.3039	0.1904	0.2174	0.2174	0.2196	0.247	0.2301	0.1704	0.2298	0.1952	0.2147	0.2114	0.1799	0.2088	0.2108	0.2214	0.2126	0.2223	0.1661	0.2035	0.2094
12.0078	481.363	0.6256	0.5657	0.5769	0.4925	0.4987	0.6511	0.5574	0.6757	0.5805	0.5863	0.8445	0.76	0.7746	0.833	0.7555	0.9231	0.9083	0.6678	0.8084	0.8164	0.684	0.6176	0.6297	0.5843	0.5723	0.7271	0.6526	0.6905	0.6413	0.6477	0.6263	0.6002	0.714	0.6752	0.6474	0.6659
12.0162	433.334	0.2016	0.212	0.2367	0.1966	0.1734	0.1932	0.1863	0.1977	0.1997	0.2017	0.2291	0.2678	0.2504	0.2678	0.2809	0.2361	0.324	0.2657	0.2652	0.2679	0.2096	0.2271	0.2414	0.2167	0.2037	0.2061	0.2233	0.2205	0.2174	0.2195	0.1685	0.1705	0.1351	0.1751	0.1607	0.1653
12.0268	449.36	0.2888	0.2416	0.2443	0.2456	0.1451	0.3217	0.246	0.2644	0.2497	0.2522	0.2715	0.3205	0.2549	0.2748	0.2878	0.316	0.3463	0.3826	0.3068	0.3099	0.2859	0.2627	0.2482	0.2555	0.184	0.3235	0.2741	0.302	0.2655	0.2682	0.3112	0.3085	0.326	0.3847	0.3293	0.3387
12.0365	615.575	0.1519	0.1819	0.1685	0.1984	0.1738	0.2147	0.1971	0.1805	0.1834	0.1852	0.2618	0.2036	0.2204	0.2106	0.1896	0.1982	0.2102	0.1629	0.2072	0.2092	0.1804	0.1883	0.1825	0.2035	0.1805	0.2127	0.2025	0.1804	0.1904	0.1923	0.208	0.1305	0.1745	0.1731	0.1698	0.1747
12.0665	439.352	0.6017	0.7655	0.6944	0.8733	0.6807	0.8862	1.0388	0.7657	0.7883	0.7962	1.0286	1.2376	0.9353	0.9388	1.1337	1.3421	1.0214	0.8466	1.0605	1.0711	0.7125	0.8885	0.7587	0.8987	0.8076	1.0115	1.045	0.8061	0.8615	0.87	0.801	0.8391	0.7131	0.786	0.777	0.7992
12.0862	362.338	0.6074	0.5998	0.5438	0.6317	0.5559	0.5257	0.6524	0.6864	0.6004	0.6064	0.863	0.6899	0.9626	0.7383	0.8123	0.7749	0.8587	0.6692	0.7961	0.8041	0.675	0.6255	0.6523	0.6652	0.6303	0.5946	0.7117	0.699	0.6532	0.6597	0.6258	0.699	0.7312	0.6814	0.6775	0.6969
12.0864	340.356	0.6481	0.632	0.5825	0.6997	0.6364	0.5591	0.6355	0.6642	0.6322	0.6385	0.6698	0.6152	0.6653	0.6131	0.7579	0.5921	0.6047	0.5422	0.6325	0.6389	0.6569	0.6309	0.6064	0.6846	0.6772	0.5732	0.6341	0.6488	0.6358	0.6421	0.6712	0.659	0.6383	0.5932	0.634	0.6522
12.0983	437.358	0.3389	0.3959	0.3228	0.3903	0.3828	0.3002	0.3583	0.3605	0.3562	0.3598	0.4182	0.4742	0.5456	0.412	0.4537	0.5053	0.4923	0.3471	0.4561	0.4606	0.3606	0.4177	0.3807	0.3997	0.4068	0.3556	0.3961	0.366	0.3834	0.3872	0.4247	0.3341	0.4026	0.4314	0.3942	0.4055
12.1251	796.545	0.6189	0.5133	0.4776	0.4572	0.4751	0.42	0.5277	0.4031	0.4866	0.4915	0.4745	0.5857	0.7926	0.7252	0.5975	0.6239	0.5033	0.4069	0.5887	0.5946	0.5856	0.5341	0.5596	0.5301	0.5137	0.4763	0.5269	0.4142	0.5151	0.5202	0.2794	0.428	0.3788	0.3103	0.3456	0.3555
12.1252	774.559	0.5903	0.5695	0.5881	0.5731	0.5472	0.5843	0.4772	0.5195	0.5562	0.5617	0.6227	0.528	0.7541	0.646	0.4604	0.6471	0.5887	0.496	0.5929	0.5988	0.6015	0.5619	0.633	0.5974	0.5331	0.6063	0.5105	0.5263	0.5685	0.5742	0.4	0.3821	0.5536	0.4844	0.4505	0.4634
12.1319	388.353	0.2858	0.24	0.2584	0.3228	0.263	0.221	0.2231	0.2534	0.2584	0.261	0.258	0.2682	0.2685	0.2872	0.3525	0.2786	0.3482	0.2257	0.2859	0.2887	0.2802	0.2483	0.2623	0.317	0.29	0.2379	0.2573	0.2525	0.2668	0.2695	0.4543	0.3966	0.4765	0.476	0.4463	0.4591
12.1404	828.55	1.1338	1.2405	1.177	1.403	1.068	0.9896	1.2289	1.3881	1.2036	1.2156	1.0311	1.0005	0.7815	0.7381	0.9972	0.9159	0.8741	0.618	0.8696	0.8782	1.1136	1.1861	1.0831	1.2475	1.0658	0.9809	1.1509	1.2207	1.1259	1.1371	0.8384	0.9286	0.8808	1.0358	0.9117	0.9378
12.1477	425.338	0.3167	0.2803	0.4099	0.3271	0.2715	0.3167	0.3639	0.2782	0.3205	0.3237	0.4922	0.4338	0.4172	0.4503	0.5103	0.4677	0.5478	0.3867	0.4633	0.4679	0.3626	0.3205	0.4138	0.3618	0.3371	0.3585	0.4145	0.3136	0.3584	0.362	0.3618	0.3255	0.4404	0.327	0.36	0.3704
12.1481	850.534	1.1007	1.2046	1.0377	1.2212	0.9197	1.1546	1.1429	0.8508	1.079	1.0898	1.139	1.049	0.7168	0.7555	0.9258	0.819	0.8667	0.739	0.8764	0.8851	1.1159	1.1713	0.9619	1.1147	0.9351	1.0808	1.0841	0.8427	1.0338	1.0441	0.8898	0.8909	0.9445	1.0182	0.9265	0.953
12.1507	701.557	7.933	9.0343	8.2197	8.2218	8.0835	7.7699	7.8829	7.9242	8.1337	8.215	9.0258	7.2157	7.9164	7.7609	7.6588	8.3254	8.7118	6.9617	7.9471	8.0265	8.249	8.6203	8.1846	8.1865	8.0954	7.9909	8.1748	7.8696	8.1317	8.2125	8.1178	8.2813	8.5098	8.4135	8.2473	8.4836
12.1725	608.463	0.5992	0.6846	0.6581	0.5568	0.5707	0.5129	0.5068	0.597	0.5858	0.5916	1.002	0.7122	0.7876	0.7727	0.8102	1.0277	0.9231	0.7507	0.8483	0.8568	0.7039	0.695	0.6941	0.6174	0.6409	0.6495	0.6182	0.6523	0.6554	0.6619	0.6981	0.6089	0.6847	0.6331	0.6496	0.6683
12.178	469.327	0.4418	0.3758	0.3475	0.4584	0.432	0.2808	0.5075	0.3204	0.3955	0.3995	0.6697	0.7152	0.5822	0.6523	0.6132	0.636	0.599	0.5781	0.6307	0.637	0.5016	0.4634	0.4085	0.5124	0.4851	0.3743	0.536	0.3961	0.4572	0.4617	0.5292	0.5597	0.5382	0.3989	0.5014	0.5158
12.1836	778.535	1.7478	1.1077	2.0261	2.1223	1.7874	2.345	1.9474	1.6879	1.8465	1.8649	2.1105	2.0225	1.6313	1.6006	1.9723	2.4814	1.929	1.3998	1.8934	1.9124	1.8482	1.3442	1.9366	2.0105	1.8618	2.4037	1.9626	1.6545	1.8686	1.8872	1.8182	2.0003	2.0831	1.9857	1.9521	2.008
12.1845	800.518	1.6464	1.084	1.851	1.8999	1.5029	1.8757	1.8622	1.7699	1.6865	1.7034	1.9863	1.8395	1.6089	1.6712	1.9231	1.8731	1.5494	1.4104	1.7327	1.7501	1.7405	1.2802	1.7992	1.8606	1.6336	1.8942	1.8014	1.7198	1.7076	1.7245	1.5437	1.5621	1.6346	1.8676	1.6355	1.6823
12.2496	754.535	3.6921	2.5704	3.9854	4.3728	4.2981	4.2959	4.7493	5.3714	4.1669	4.2086	2.7512	3.2475	3.3494	3.3737	4.0232	4.6451	3.3691	2.9139	3.4591	3.4937	3.4731	2.7542	3.8449	4.1618	4.2918	4.4288	4.4457	4.8606	4.0112	4.0511	4.1262	3.7951	3.7	4.0827	3.8867	3.9981
12.2509	776.518	3.5452	2.4449	3.6846	4.1313	4.3773	5.0571	4.9465	3.833	4.0025	4.0425	3.5771	3.7449	3.1694	3.2939	4.0395	4.9175	3.6665	2.849	3.6572	3.6938	3.5712	2.7854	3.5731	3.9591	4.356	5.0731	4.6704	3.6705	3.9375	3.9766	3.7895	3.8361	3.8196	4.2038	3.8731	3.9841
12.2759	521.38	0.552	0.689	0.6957	0.7011	0.6363	0.6686	0.7858	0.6335	0.6703	0.677	0.8104	0.8516	0.9761	0.8883	0.8896	0.86	0.8714	0.7994	0.8684	0.877	0.62	0.7335	0.77	0.7558	0.7111	0.7242	0.8157	0.6929	0.7241	0.7312	0.841	0.8895	0.8765	0.8303	0.8507	0.8751
12.2762	599.427	0.9386	1.0267	0.9452	1.0875	0.9682	1.0099	1.0081	0.9157	0.9875	0.9974	1.0561	1.0791	1.1454	1.1647	1.3505	1.3128	1.2373	1.0318	1.1722	1.1839	0.973	1.0451	1.0005	1.1181	1.0812	1.0975	1.0769	0.9691	1.0397	1.05	0.8925	0.9965	0.9612	0.9197	0.9331	0.9598
12.2766	516.422	0.3078	0.319	0.3259	0.2486	0.2319	0.2996	0.311	0.2372	0.2851	0.288	0.2383	0.2439	0.2909	0.3462	0.1929	0.258	0.249	0.234	0.2567	0.2592	0.2918	0.3016	0.3187	0.276	0.2253	0.292	0.2984	0.2423	0.2795	0.2823	0.3254	0.3314	0.2994	0.3059	0.3124	0.3213
12.2826	727.573	0.2804	0.3677	0.2798	0.3756	0.2947	0.3913	0.3881	0.4258	0.3504	0.3539	0.2819	0.2171	0.2806	0.326	0.2357	0.2818	0.2762	0.247	0.2683	0.271	0.2822	0.3315	0.2814	0.3667	0.2839	0.3674	0.3635	0.3895	0.3316	0.3349	0.3018	0.2901	0.3244	0.2785	0.2957	0.3042
12.2868	469.346	1.1554	1.3732	1.1955	1.0776	1.3158	1.3332	1.455	1.5561	1.3077	1.3208	1.8721	1.8349	2.03	2.0289	2.15	2.032	2.6866	2.1695	2.1005	2.1215	1.3422	1.4966	1.4123	1.331	1.5503	1.5251	1.784	1.756	1.5154	1.5304	1.654	1.5756	1.7345	1.7489	1.6615	1.7091
12.2878	742.535	0.3449	0.3688	0.3636	0.3162	0.3024	0.3173	0.275	0.3556	0.3305	0.3338	0.46	0.4454	0.3958	0.3296	0.3786	0.4661	0.426	0.3706	0.409	0.4131	0.3757	0.39	0.3736	0.3228	0.3266	0.3585	0.3163	0.3684	0.3522	0.3557	0.2758	0.2528	0.2867	0.2702	0.2687	0.2764
12.2881	764.518	0.2798	0.234	0.31	0.2721	0.2746	0.2141	0.2777	0.2919	0.2693	0.272	0.4401	0.3923	0.3723	0.3586	0.3512	0.4063	0.4318	0.3263	0.3849	0.3887	0.3217	0.2751	0.3273	0.2969	0.2984	0.2653	0.3198	0.3082	0.3	0.303	0.2439	0.254	0.2613	0.2636	0.2531	0.2604
12.3056	820.507	0.3572	0.2713	0.3162	0.3224	0.3463	0.3347	0.2346	0.387	0.3212	0.3244	0.3681	0.2918	0.2491	0.2257	0.2956	0.2954	0.3333	0.2463	0.2882	0.291	0.3618	0.2778	0.3009	0.301	0.3384	0.3281	0.2622	0.3597	0.3146	0.3178	0.2223	0.2058	0.2028	0.215	0.2094	0.2154
12.3068	730.536	5.755	4.5726	5.316	4.9463	5.3236	5.1523	4.9298	5.0464	5.1303	5.1816	6.4846	5.5412	6.0774	5.6127	5.7052	6.8043	5.8161	4.9085	5.8688	5.9274	5.9683	4.84	5.5351	5.1657	5.5017	5.6263	5.2062	5.1364	5.3455	5.3986	4.8341	4.79	4.8181	5.0738	4.8302	4.9686
12.3077	752.518	4.4764	4.1753	4.8654	4.2739	5.1356	4.7065	4.5158	4.6285	4.5972	4.6431	6.6124	5.5757	5.7652	5.0379	5.4963	6.6469	5.4893	4.5101	5.6417	5.6981	5.0384	4.5498	5.1172	4.5115	5.3055	5.2495	4.8102	4.7131	4.8868	4.9353	4.3897	4.2647	4.4765	4.8996	4.4625	4.5904
12.3252	854.567	3.7769	3.5308	4.0667	4.1564	3.2886	2.5603	3.4129	4.2202	3.6266	3.6629	3.5872	3.1906	2.1947	2.8813	3.2629	2.8756	2.78	2.421	2.8992	2.9282	3.7481	3.4626	3.6145	3.8728	3.3313	2.6669	3.2863	3.8534	3.4629	3.4973	2.9168	3.3909	2.9156	3.5385	3.1585	3.2491
12.3623	462.388	0.1365	0.1237	0.096	0.1112	0.1122	0.1663	0.1595	0.1047	0.1263	0.1275	0.1587	0.1292	0.199	0.1727	0.1734	0.1399	0.2022	0.1469	0.1652	0.1669	0.1428	0.1257	0.1225	0.128	0.1297	0.1613	0.172	0.1184	0.1368	0.1382	0.1224	0.1494	0.1314	0.1321	0.1325	0.1363
12.3912	870.521	0.3067	0.2892	0.3468	0.4227	0.3091	0.3579	0.377	0.3466	0.3445	0.3479	0.3775	0.3061	0.2383	0.2455	0.3145	0.3186	0.3655	0.2071	0.2966	0.2996	0.3261	0.2949	0.3212	0.3817	0.3151	0.3515	0.3779	0.3186	0.3343	0.3376	0.2583	0.227	0.2298	0.2838	0.2472	0.2543
12.3929	814.533	1.9803	1.8007	2.0767	2.0684	2.4091	2.1727	2.2907	1.9773	2.097	2.118	2.2235	1.8862	2.3169	2.1772	2.0917	2.2704	2.3435	1.813	2.1403	2.1617	2.0517	1.8313	2.1478	2.1168	2.3635	2.2198	2.3275	1.9836	2.1196	2.1407	1.9073	2.0207	2.1754	1.9639	1.9967	2.0539
12.3952	920.536	0.7494	0.7377	0.7184	0.7365	0.6459	0.6007	0.6583	0.7838	0.7038	0.7109	0.5069	0.4661	0.5188	0.4683	0.5327	0.5494	0.4909	0.4561	0.4987	0.5036	0.6919	0.6728	0.6716	0.6755	0.6264	0.5937	0.6223	0.7174	0.6559	0.6624	0.5828	0.5843	0.5585	0.5674	0.5675	0.5838
12.3971	868.522	0.2618	0.2321	0.2742	0.2609	0.1899	0.1916	0.2434	0.2326	0.2358	0.2382	0.3833	0.2958	0.3688	0.3403	0.4647	0.3742	0.3454	0.3365	0.3636	0.3673	0.2938	0.2493	0.2995	0.2838	0.2635	0.2401	0.2719	0.2657	0.2694	0.2721	0.5933	0.8153	0.7848	0.6913	0.714	0.7344
12.3976	792.55	1.6865	1.6011	1.7063	1.7189	1.8069	1.8026	1.812	1.8253	1.745	1.7624	1.5797	1.2977	1.7118	1.6118	1.8805	1.7836	1.5839	1.4823	1.6164	1.6326	1.668	1.5325	1.7163	1.7088	1.853	1.8161	1.7723	1.7809	1.7222	1.7393	1.4884	1.4856	1.5737	1.6286	1.5286	1.5724
12.3993	830.566	11.3792	11.6037	11.4382	11.1057	10.429	7.1766	8.6977	9.4814	10.1639	10.2656	8.9168	7.9888	8.1615	7.9099	8.8811	7.5421	7.8246	7.1153	8.0425	8.1229	10.8149	10.749	10.6685	10.4018	10.1869	7.3431	8.5637	9.0973	9.6842	9.7805	9.0975	9.2288	8.4143	9.2125	8.8984	9.1534
12.4028	852.548	14.5241	14.5237	14.3411	14.163	12.1639	11.0206	13.8374	14.1212	13.5869	13.7227	12.8797	12.4916	11.9029	10.9695	13.2157	11.7566	11.7682	9.574	11.8198	11.938	14.1822	14.0832	13.7978	13.4903	12.6172	11.3208	13.4507	13.2806	13.2157	13.3471	12.9479	13.3465	14.242	13.7838	13.4442	13.8295
12.4253	778.533	6.2721	6.6066	6.3214	4.8559	5.6457	4.1262	4.4836	7.5716	5.7354	5.7927	11.6709	9.2015	9.0447	8.648	9.1899	10.1147	10.7665	7.1927	9.4786	9.5734	7.6671	7.2948	7.041	5.8714	6.643	5.696	6.1321	7.6614	6.7135	6.7802	5.7945	5.6422	6.1048	5.9834	5.8224	5.9892
12.4269	846.522	0.401	0.5097	0.4205	0.4717	0.3271	0.3079	0.3371	0.2758	0.3814	0.3852	0.6169	0.5308	0.4948	0.4391	0.5146	0.6932	0.7102	0.4282	0.5535	0.559	0.4575	0.5176	0.4414	0.4681	0.3803	0.4093	0.4357	0.3227	0.427	0.4312	0.3516	0.3338	0.2968	0.3482	0.3293	0.3387
12.4296	756.551	5.4209	5.8035	5.409	4.3725	4.8457	3.7901	3.8028	6.0135	4.9323	4.9816	8.5264	6.8654	6.5052	6.5058	7.0859	7.0006	8.0477	5.3923	6.9912	7.0611	6.2325	6.1006	5.7131	4.9602	5.4952	4.6478	4.9245	6.0008	5.4801	5.5346	4.4979	4.2263	4.6341	4.4536	4.4084	4.5348
12.4728	806.567	15.9739	17.8666	15.9459	16.551	15.9943	12.4443	13.8671	14.8899	15.4416	15.596	16.8327	14.4856	13.1238	12.7812	16.0449	14.8793	15.7956	12.2868	14.5287	14.674	16.2714	17.1022	15.3138	15.7552	16.2472	13.1925	14.5006	14.5788	15.2967	15.4488	12.3926	12.7083	12.5601	12.513	12.4181	12.7739
12.4757	828.549	18.5939	21.361	18.7699	23.2807	17.8046	17.0031	19.1675	20.0058	19.4983	19.6933	26.3598	23.0586	21.1697	19.7928	24.934	21.2637	25.7143	18.6788	22.6215	22.8477	20.6489	21.8964	19.4707	22.6241	19.9075	18.2635	21.0332	20.1576	20.3962	20.5989	18.5666	19.7333	19.1897	19.2955	19.0043	19.5489
12.4807	896.536	0.8376	0.9312	0.7821	0.8118	0.9143	0.7899	0.9349	0.8174	0.8524	0.8609	0.8832	0.7906	0.7745	0.7634	0.8793	0.7596	0.858	0.683	0.799	0.8069	0.8533	0.9004	0.7841	0.8076	0.919	0.7902	0.9248	0.8026	0.8436	0.852	0.6792	0.7097	0.7517	0.8209	0.733	0.754
12.4833	844.523	0.2392	0.282	0.3227	0.2882	0.3459	0.2599	0.277	0.3357	0.2938	0.2968	0.6354	0.624	0.5683	0.5408	0.7103	0.5909	0.6541	0.5287	0.6066	0.6126	0.3405	0.3698	0.3864	0.3555	0.4449	0.347	0.376	0.3948	0.3745	0.3782	0.9389	1.0068	1.0214	0.9373	0.9663	0.994
12.4876	768.551	1.9778	2.1335	2.2853	2.88	2.7062	2.9035	2.4643	2.3968	2.4684	2.4931	1.6961	1.7454	1.9412	2.0073	1.9881	2.3813	2.0888	1.8539	1.9628	1.9824	1.9167	2.0462	2.2099	2.6863	2.5619	2.7999	2.3937	2.3142	2.3543	2.3777	1.7249	1.929	1.6932	1.7269	1.7508	1.801
12.488	790.533	2.5414	2.2174	2.7477	3.279	3.0864	2.4645	4.0461	3.3326	2.9644	2.994	2.3546	2.1825	2.6004	2.6241	2.6237	2.9521	2.7678	2.4582	2.5704	2.5961	2.5071	2.2197	2.7244	3.1448	3.0136	2.614	3.7613	3.1864	2.8813	2.9099	2.6589	2.7122	2.7216	2.9766	2.7397	2.8182
12.4975	878.563	0.4365	0.4819	0.4731	0.4566	0.4953	0.349	0.6021	0.4561	0.4688	0.4735	0.6489	0.6146	0.4623	0.4534	0.5897	0.622	0.5209	0.3924	0.538	0.5434	0.4923	0.5178	0.4728	0.4604	0.527	0.4222	0.5875	0.4508	0.4889	0.4938	0.4826	0.5693	0.5423	0.4706	0.511	0.5257
12.523	797.539	0.1578	0.1661	0.2076	0.1991	0.2089	0.1775	0.2049	0.1727	0.1868	0.1887	0.2131	0.24	0.2877	0.2206	0.2356	0.272	0.2438	0.2052	0.2398	0.2421	0.1726	0.1856	0.2289	0.2066	0.2189	0.2034	0.2169	0.1855	0.2012	0.2032	0.1637	0.1775	0.1585	0.1863	0.1698	0.1747
12.549	766.533	3.2301	3.3133	3.5229	2.8985	3.1428	2.7765	2.9976	3.1515	3.1292	3.1604	3.0128	2.8578	3.6897	3.5405	3.1974	3.4735	3.1884	2.847	3.2259	3.2581	3.1915	3.2149	3.5828	3.0912	3.204	2.9826	3.0769	3.1504	3.171	3.2025	3.1862	3.0694	3.3189	3.2323	3.1697	3.2605
12.5512	744.551	2.5563	3.0121	2.9799	2.4122	2.8478	2.3265	2.2051	2.7693	2.6387	2.665	2.5495	2.1104	2.9585	2.6075	2.4749	2.7411	2.626	2.3008	2.5461	2.5715	2.5675	2.7995	2.9895	2.4861	2.7945	2.456	2.335	2.7156	2.6299	2.6561	2.1554	2.1279	2.2507	2.2758	2.1804	2.2429
12.5625	916.562	0.4188	0.4046	0.3453	0.4439	0.4649	0.4192	0.4079	0.3723	0.4096	0.4137	0.4789	0.3901	0.4955	0.4088	0.4781	0.4451	0.5488	0.4511	0.4621	0.4667	0.4361	0.403	0.385	0.4394	0.4753	0.4301	0.448	0.4023	0.4251	0.4294	0.4154	0.4357	0.5161	0.4895	0.4595	0.4727
12.5823	816.548	0.944	0.991	1.0597	1.1029	1.0388	0.8411	0.9206	0.9884	0.9858	0.9957	1.2308	1.0477	1.0948	0.9922	1.0994	1.3491	1.1792	0.8617	1.1069	1.1179	1.0212	1.0103	1.0739	1.0857	1.07	0.9793	0.996	0.9799	1.0219	1.032	0.7722	0.877	0.8507	0.8284	0.8238	0.8474
12.5915	794.566	0.6629	0.6653	0.6654	0.6836	0.7945	0.8065	0.7108	0.8187	0.726	0.7332	0.8558	0.6252	0.6231	0.6918	0.7794	0.8015	0.684	0.5469	0.701	0.708	0.715	0.6585	0.6581	0.6925	0.8025	0.8135	0.7112	0.7678	0.7237	0.7309	0.5591	0.692	0.6227	0.6928	0.6352	0.6534
12.5986	521.414	0.1145	0.1288	0.0826	0.1404	0.0957	0.1193	0.1273	0.0996	0.1135	0.1147	0.1401	0.1229	0.1753	0.1059	0.1752	0.1303	0.179	0.144	0.1466	0.1481	0.1215	0.128	0.1064	0.133	0.1176	0.1233	0.1418	0.1137	0.1225	0.1237	0.1773	0.1518	0.1708	0.1764	0.1674	0.1722
12.6507	806.567	23.4992	23.5225	24.6797	25.4602	24.3426	25.2663	26.1296	24.5521	24.6815	24.9283	21.4047	19.0796	21.6692	22.2002	21.8555	22.9653	21.2742	18.9738	21.1778	21.3896	23.089	22.5183	24.0441	24.8835	24.0673	24.9371	25.1576	23.7016	23.9331	24.171	19.7098	20.1681	20.922	19.6945	19.9224	20.4932
12.6518	66.2775	0.5511	0.3262	0.4981	0.505	0.531	0.5565	0.5741	0.538	0.51	0.5151	0.4251	0.3649	0.5405	0.557	0.4589	0.5628	0.5227	0.3937	0.4782	0.483	0.5221	0.3376	0.5113	0.5233	0.5204	0.5638	0.5668	0.5136	0.5048	0.5098	0.4124	0.4372	0.4646	0.4001	0.4243	0.4364
12.654	153.152	0.2029	0.1676	0.2737	0.219	0.198	0.1907	0.2078	0.2242	0.2105	0.2126	0.1411	0.13	0.1831	0.1748	0.1841	0.1621	0.1682	0.1451	0.1611	0.1627	0.1883	0.1589	0.2522	0.2099	0.1974	0.1854	0.1998	0.209	0.1992	0.2011	0.1885	0.2639	0.2348	0.2068	0.2213	0.2276
12.6549	828.549	25.0753	26.8443	25.7828	26.8862	26.2966	27.193	30.775	29.8195	27.3341	27.6074	31.6534	30.0276	31.385	28.8809	34.268	30.7996	33.3919	25.8176	30.778	31.0858	26.8631	27.7823	27.3277	27.6637	28.7437	28.3905	31.7566	29.5145	28.3567	28.6384	27.4239	28.0977	29.7906	27.908	28.022	28.8249
12.6561	66.0224	0.5787	0.4324	0.4686	0.6221	0.5165	0.5721	0.5763	0.4084	0.5219	0.5271	0.3843	0.4255	0.5194	0.5082	0.5029	0.4359	0.4464	0.3702	0.4491	0.4536	0.5325	0.4328	0.4838	0.5993	0.5207	0.5432	0.549	0.4086	0.5064	0.5114	0.5149	0.4831	0.5223	0.434	0.4837	0.4975
12.657	66.1024	0.5319	0.6307	0.7309	0.469	0.6711	0.7092	0.9129	0.6277	0.6604	0.667	0.6196	0.6971	0.7973	0.7122	0.597	0.7177	0.5342	0.3892	0.633	0.6394	0.5567	0.6506	0.7514	0.5357	0.6621	0.7186	0.8256	0.5808	0.6572	0.6637	0.5798	0.5583	0.6043	0.6186	0.5843	0.6011
12.6679	844.527	0.3398	0.363	0.3351	0.3896	0.4599	0.4105	0.4327	0.4718	0.4003	0.4043	0.7702	0.812	0.7931	0.7594	0.9755	0.7725	0.8508	0.7441	0.8097	0.8178	0.4502	0.4782	0.4524	0.4878	0.5996	0.507	0.5438	0.5551	0.506	0.511	1.4489	1.4187	1.5134	1.4854	1.4519	1.4935
12.6744	940.561	0.4342	0.4269	0.3354	0.3828	0.4302	0.4601	0.4304	0.4502	0.4188	0.423	0.5144	0.4727	0.4944	0.3518	0.4585	0.5184	0.493	0.4144	0.4647	0.4693	0.4566	0.4406	0.3772	0.3787	0.4439	0.4797	0.4508	0.4521	0.4327	0.437	0.3939	0.5038	0.4354	0.4911	0.4515	0.4644
12.6755	896.536	1.0044	0.9875	0.958	0.986	1.0821	0.9853	1.0097	0.9704	0.9979	1.0079	0.9065	0.9068	0.8326	0.921	0.9243	1.0229	1.1215	0.821	0.9321	0.9414	0.9848	0.9721	0.9312	0.9793	1.0577	1.0049	1.0485	0.9554	0.9868	0.9966	0.8327	0.9431	0.9096	0.9026	0.888	0.9135
12.687	732.551	0.7518	0.7604	0.7401	0.7747	0.7416	0.7337	0.5532	0.6227	0.7098	0.7169	0.8301	0.8641	0.9546	0.769	0.8239	0.91	1.0385	0.6823	0.8591	0.8677	0.7754	0.7904	0.798	0.781	0.7739	0.7862	0.6826	0.6539	0.7515	0.7589	0.5727	0.4763	0.4886	0.5404	0.5143	0.529
12.6902	754.533	0.8154	0.854	0.9372	0.8079	0.7542	0.7438	0.5821	0.8408	0.7919	0.7998	1.1086	1.1664	1.2462	1.0456	1.0681	1.1547	1.3161	1.1792	1.1606	1.1722	0.8936	0.9372	1.02	0.8766	0.8463	0.8562	0.7753	0.9507	0.8895	0.8984	0.7104	0.8302	0.7182	0.7592	0.747	0.7684
12.7163	57.7362	0.1699	0.1631	0.1891	0.1608	0.201	0.2254	0.2072	0.2146	0.1914	0.1933	0.1893	0.194	0.2294	0.2548	0.2517	0.2025	0.2139	0.207	0.2178	0.22	0.1757	0.1717	0.2002	0.1864	0.2171	0.2219	0.211	0.218	0.1991	0.2011	0.135	0.1679	0.1909	0.1654	0.1632	0.1678
12.7414	135.839	0.1661	0.1689	0.1419	0.2145	0.222	0.1734	0.216	0.1939	0.1871	0.189	0.1944	0.1507	0.1667	0.1657	0.2451	0.2008	0.1933	0.1835	0.1875	0.1894	0.1741	0.1651	0.1489	0.2042	0.2313	0.1822	0.2124	0.196	0.1882	0.1901	0.2691	0.2217	0.2564	0.2227	0.2401	0.2469
12.7463	135.6	0.3397	0.3328	0.2609	0.3096	0.3524	0.281	0.372	0.3688	0.3272	0.3304	0.2926	0.2415	0.3213	0.2247	0.2158	0.3734	0.301	0.2693	0.28	0.2827	0.3295	0.3114	0.2775	0.291	0.3225	0.3074	0.3577	0.3519	0.317	0.3202	0.3041	0.3454	0.3189	0.3104	0.3165	0.3256
12.7473	135.48	0.1704	0.2942	0.3151	0.2768	0.267	0.3072	0.3308	0.2109	0.2716	0.2743	0.2037	0.2261	0.1928	0.2444	0.3471	0.3075	0.3215	0.2246	0.2585	0.261	0.1797	0.2785	0.2858	0.2713	0.2916	0.3104	0.3318	0.2198	0.2698	0.2724	0.3036	0.2381	0.2037	0.2459	0.2453	0.2524
12.7477	55.6346	0.5501	0.4384	0.5169	0.4814	0.5179	0.4381	0.6467	0.4577	0.5059	0.511	0.9162	0.666	0.6732	0.5591	0.6623	0.6971	0.8053	0.6387	0.7022	0.7093	0.6453	0.4981	0.559	0.506	0.5629	0.5086	0.6938	0.5167	0.5583	0.5639	0.4356	0.5618	0.4734	0.6462	0.524	0.539
12.7484	782.567	23.8889	26.2233	23.9708	25.2744	24.2536	25.5465	26.2063	25.5776	25.1177	25.3689	24.5973	22.8812	23.6026	22.7979	24.7968	25.0909	24.5883	20.534	23.6111	23.8472	24.1884	25.5105	23.9989	24.8956	24.7573	25.691	26.061	24.8931	24.8765	25.1238	23.6692	22.5765	23.369	23.9046	23.146	23.8093
12.7491	55.7932	0.4617	0.5602	0.6803	0.6451	0.6926	0.6255	0.816	0.5695	0.6314	0.6377	0.7001	0.5904	0.813	0.7525	0.6247	0.6778	0.8261	0.6378	0.7028	0.7098	0.5242	0.5706	0.7172	0.6789	0.6855	0.6452	0.8269	0.6017	0.6529	0.6594	0.5402	0.658	0.7351	0.8706	0.694	0.7139
12.7508	820.523	0.3031	0.3034	0.321	0.3953	0.3003	0.3166	0.3644	0.2443	0.3186	0.3217	0.7878	0.6417	0.67	0.6135	0.8164	0.7457	0.771	0.5705	0.7021	0.7091	0.427	0.3903	0.4108	0.4549	0.4377	0.4293	0.4718	0.336	0.4173	0.4214	1.2893	1.3697	1.4319	1.509	1.386	1.4257
12.7513	135.72	0.282	0.2112	0.2321	0.3251	0.2438	0.3394	0.3111	0.3147	0.2824	0.2852	0.3012	0.2316	0.2983	0.2146	0.2612	0.2961	0.2904	0.2419	0.2669	0.2696	0.2883	0.2174	0.25	0.3002	0.2519	0.3318	0.309	0.3035	0.2801	0.2829	0.3442	0.3408	0.3246	0.3634	0.3398	0.3496
12.7516	55.7111	0.65	0.5934	0.7361	0.6129	0.654	0.7396	0.8077	0.7303	0.6905	0.6974	0.901	0.6785	0.8642	0.8205	1.1385	0.83	0.8214	0.8325	0.8608	0.8694	0.7167	0.6179	0.7722	0.672	0.7886	0.7702	0.8194	0.7754	0.7374	0.7447	0.6328	0.7245	0.7525	0.7262	0.7019	0.722
12.7559	1195.83	2.9994	3.3597	3.2452	3.437	3.1431	3.3194	3.8736	3.6174	3.3744	3.4081	4.4466	4.1776	4.5292	4.115	4.8746	4.3961	4.825	3.6857	4.3812	4.425	3.38	3.583	3.5858	3.6443	3.6361	3.6279	4.1558	3.7258	3.6476	3.6839	4.1714	3.7382	4.12	4.2894	4.039	4.1547
12.7713	53.8917	0.2416	0.1805	0.1724	0.2127	0.1752	0.2454	0.2095	0.2312	0.2086	0.2106	0.2976	0.2685	0.267	0.1827	0.2205	0.268	0.2752	0.1955	0.2469	0.2493	0.257	0.2036	0.1972	0.2072	0.1895	0.2537	0.2284	0.2276	0.2194	0.2216	0.1471	0.1523	0.1934	0.2041	0.1725	0.1774
12.7775	53.7967	0.2256	0.2608	0.2982	0.3147	0.2574	0.2904	0.3045	0.2758	0.2784	0.2812	0.2667	0.3421	0.2879	0.3601	0.3207	0.2665	0.2519	0.2371	0.2916	0.2945	0.2371	0.2826	0.2971	0.3294	0.2776	0.2873	0.2942	0.2725	0.2833	0.2861	0.2116	0.2215	0.1938	0.1905	0.2023	0.2081
12.7776	53.7253	0.3028	0.2727	0.2891	0.2974	0.2967	0.2841	0.3452	0.3092	0.2997	0.3026	0.4007	0.3704	0.4245	0.3132	0.3391	0.3292	0.3487	0.4296	0.3694	0.3731	0.3291	0.2987	0.3248	0.3044	0.3121	0.2985	0.3496	0.3485	0.319	0.3221	0.2594	0.2426	0.2336	0.3152	0.2601	0.2675
12.785	1183.83	1.5542	1.5477	1.7124	1.9571	1.8099	1.8304	2.1251	1.7367	1.7842	1.802	2.3996	2.0045	2.0979	2.1278	2.1696	2.0485	1.9939	1.9429	2.0981	2.1191	1.7755	1.6708	1.8184	2.0202	1.9297	1.9047	2.1133	1.8342	1.8735	1.8921	1.5898	1.6432	1.7951	1.7785	1.6846	1.7329
12.7855	51.6817	0.2365	0.1831	0.1583	0.2408	0.1576	0.1815	0.2818	0.202	0.2052	0.2073	0.2275	0.2629	0.263	0.262	0.1864	0.1794	0.2008	0.1863	0.221	0.2232	0.2354	0.2042	0.1855	0.2486	0.1674	0.1828	0.264	0.2029	0.2103	0.2124	0.1652	0.1669	0.1527	0.1566	0.1587	0.1633
12.7861	51.7658	0.2691	0.2788	0.2491	0.2673	0.3096	0.2692	0.3249	0.3133	0.2852	0.288	0.2584	0.2828	0.2841	0.2341	0.2871	0.2556	0.2343	0.2613	0.2622	0.2648	0.2678	0.2812	0.2592	0.2615	0.3085	0.2685	0.3051	0.3075	0.2809	0.2837	0.2258	0.2942	0.2576	0.249	0.2541	0.2614
12.7905	792.549	1.8347	1.8004	1.8876	2.1965	1.9442	1.8812	2.2284	1.9768	1.9687	1.9884	2.3839	2.294	2.4258	2.3718	2.6751	2.3255	2.3232	2.1282	2.3659	2.3896	1.9827	1.934	2.033	2.2632	2.1616	2.0137	2.2753	2.066	2.0801	2.1007	2.0537	2.0152	2.0154	1.9198	1.981	2.0378
12.7982	124.249	0.1182	0.1192	0.1497	0.1389	0.2195	0.1313	0.1341	0.1492	0.145	0.1465	0.1245	0.1425	0.142	0.1361	0.1239	0.1235	0.1212	0.1142	0.1285	0.1298	0.1204	0.1257	0.1485	0.1396	0.1982	0.1307	0.1322	0.1437	0.1416	0.143	0.1351	0.1799	0.1128	0.1395	0.1404	0.1444
12.8058	780.549	25.9707	20.8127	20.6167	20.5498	19.8451	20.6988	21.464	20.4006	21.2948	21.5077	27.3237	24.982	23.2263	23.2718	28.4225	23.8689	25.6067	21.0746	24.7221	24.9693	26.4435	21.9695	21.3798	21.4494	22.3515	21.7187	22.7398	21.0875	22.2796	22.5009	23.5057	23.629	23.266	23.4175	23.22	23.8853
12.8091	118.875	0.2119	0.2726	0.2246	0.2462	0.2406	0.2402	0.218	0.2068	0.2326	0.2349	0.3021	0.3119	0.3487	0.271	0.2211	0.2592	0.3322	0.2855	0.2915	0.2944	0.2357	0.2839	0.2571	0.255	0.2392	0.2475	0.2494	0.2326	0.2488	0.2513	0.2812	0.2342	0.2788	0.241	0.2562	0.2636
12.8117	118.991	0.2061	0.3004	0.2191	0.2047	0.209	0.2869	0.2125	0.2426	0.2352	0.2375	0.2857	0.2908	0.3581	0.3429	0.2401	0.2958	0.3459	0.2621	0.3027	0.3057	0.2272	0.2995	0.2553	0.242	0.2202	0.2921	0.2487	0.2538	0.2535	0.2561	0.254	0.2503	0.2951	0.2072	0.2491	0.2563
12.8127	758.567	23.7269	24.8025	23.5026	23.6535	23.9597	24.9599	24.0925	23.0891	23.9733	24.2131	24.2901	22.8035	22.4741	22.2718	24.6091	24.2218	24.9293	20.6483	23.281	23.5138	23.989	24.4218	23.3616	23.5377	24.4863	25.0263	24.5518	23.0256	23.9316	24.1695	21.031	21.6407	21.4458	21.1395	21.1011	21.7057
12.825	848.536	0.4013	0.5173	0.4078	0.4544	0.4565	0.4224	0.4799	0.3808	0.4401	0.4445	0.4493	0.4678	0.4687	0.4763	0.5216	0.4206	0.5045	0.4121	0.4651	0.4698	0.4154	0.5074	0.4252	0.4645	0.4801	0.4263	0.4911	0.3985	0.4488	0.4533	0.447	0.4442	0.3812	0.439	0.4236	0.4357
12.8266	50.0126	0.3311	0.4528	0.3293	0.3977	0.3347	0.3713	0.3981	0.3971	0.3765	0.3803	0.5419	0.4781	0.4313	0.3561	0.4613	0.427	0.4205	0.3078	0.428	0.4323	0.386	0.4615	0.3567	0.3911	0.3723	0.3893	0.4079	0.3836	0.3916	0.3955	0.3488	0.2919	0.4142	0.3952	0.3589	0.3692
12.8472	54.0569	0.2838	0.2931	0.3428	0.3552	0.2597	0.3519	0.3133	0.2368	0.3046	0.3076	0.3239	0.2853	0.3551	0.3107	0.3388	0.3784	0.3596	0.2844	0.3295	0.3328	0.2954	0.2926	0.3476	0.3474	0.284	0.3623	0.3283	0.2552	0.3126	0.3157	0.2812	0.2413	0.2724	0.2959	0.27	0.2777
12.8478	54.2112	0.1689	0.1805	0.1662	0.2594	0.1954	0.1662	0.173	0.1862	0.187	0.1888	0.2577	0.182	0.2533	0.2491	0.2269	0.2388	0.2252	0.2018	0.2294	0.2316	0.1922	0.1818	0.189	0.2594	0.2064	0.1864	0.1881	0.195	0.1987	0.2007	0.2071	0.1834	0.2366	0.188	0.2017	0.2075
12.8593	58.251	0.2846	0.2388	0.2394	0.2453	0.2494	0.273	0.2452	0.2195	0.2494	0.2519	0.3276	0.2162	0.2141	0.2943	0.2666	0.2127	0.3482	0.2494	0.2661	0.2688	0.2969	0.2343	0.2342	0.2602	0.2576	0.2604	0.274	0.2328	0.255	0.2576	0.2067	0.2117	0.2278	0.2038	0.2104	0.2164
12.8639	808.582	12.6542	12.3364	12.9735	14.0561	13.8094	13.492	13.4414	12.6791	13.1803	13.3121	10.9041	10.4115	10.4588	10.1702	12.1852	12.3335	12.3354	10.4703	11.1586	11.2702	12.2762	11.912	12.404	13.2058	13.5983	13.3341	13.2964	12.4163	12.7425	12.8692	10.7155	11.3966	11.3689	11.0643	11.025	11.3409
12.8658	814.569	0.3158	0.2337	0.2382	0.2383	0.2032	0.2701	0.2812	0.2128	0.2492	0.2517	0.3046	0.2582	0.2778	0.2764	0.3837	0.2858	0.3218	0.2892	0.2997	0.3027	0.3146	0.2411	0.2494	0.2504	0.2527	0.2769	0.2944	0.2382	0.2633	0.2659	0.2518	0.33	0.3283	0.295	0.2983	0.3068
12.8682	62.5643	0.1865	0.1729	0.1548	0.2012	0.1713	0.139	0.1395	0.161	0.1658	0.1674	0.1665	0.1598	0.1548	0.1612	0.17	0.2279	0.1776	0.2243	0.1803	0.1821	0.1824	0.1705	0.1556	0.193	0.1735	0.1631	0.1506	0.1816	0.1704	0.1721	0.1276	0.1338	0.1176	0.1381	0.128	0.1316
12.87	830.564	13.7751	13.9187	13.9673	15.0337	15.3453	16.0724	16.629	14.9638	14.9632	15.1128	17.5662	14.6992	14.5481	14.7355	17.8318	17.5594	16.3541	14.2915	15.9482	16.1077	14.802	14.1854	14.1845	15.108	16.2158	16.6157	16.7286	15.1614	15.2954	15.4474	15.9856	16.5178	16.4788	16.658	16.2459	16.7115
12.8726	62.6513	0.1313	0.1429	0.1852	0.1494	0.1774	0.1547	0.138	0.1454	0.153	0.1546	0.1751	0.1376	0.153	0.1241	0.1329	0.1665	0.167	0.1399	0.1495	0.151	0.143	0.1423	0.178	0.1444	0.1686	0.1593	0.1468	0.1476	0.153	0.1545	0.1401	0.0993	0.1265	0.1003	0.1154	0.1187
12.8784	846.537	0.2456	0.1782	0.1565	0.2413	0.2662	0.2696	0.3066	0.2914	0.2444	0.2469	0.4442	0.441	0.4853	0.4817	0.5316	0.4839	0.5369	0.4086	0.4767	0.4814	0.297	0.2454	0.2403	0.305	0.3385	0.327	0.3685	0.3295	0.3045	0.3075	1.0345	1.1266	1.1039	1.1826	1.1008	1.1323
12.885	898.551	0.5626	0.5855	0.5835	0.5894	0.6466	0.5777	0.667	0.613	0.6032	0.6092	0.5569	0.5376	0.4465	0.4677	0.6632	0.5276	0.6132	0.4203	0.5291	0.5344	0.564	0.5763	0.5519	0.5643	0.6606	0.5708	0.6601	0.5777	0.5878	0.5936	0.6406	0.6244	0.7074	0.6817	0.6569	0.6757
12.9278	818.564	0.5128	0.4343	0.6562	0.8751	0.6929	0.6435	0.5763	0.6104	0.6252	0.6314	1.1973	0.9467	0.8178	0.7931	0.9765	0.7378	0.9294	0.6614	0.8825	0.8913	0.6882	0.5659	0.7003	0.8629	0.7763	0.6741	0.6723	0.639	0.6937	0.7006	0.5159	0.5438	0.645	0.6089	0.5726	0.589
12.9364	784.582	10.8011	17.9073	12.0519	12.2624	13.0547	9.386	11.4205	10.6735	12.1947	12.3166	18.4401	12.8752	11.9999	14.3724	14.4227	13.4696	18.5883	14.8345	14.8753	15.0241	12.7847	16.7262	12.0996	12.9231	13.6028	10.5235	13.3656	12.0326	12.9401	13.0687	10.4156	9.1295	10.406	9.1154	9.669	9.946
12.9478	806.564	14.2617	21.6417	13.412	19.2417	15.0327	13.1542	16.2461	11.9404	15.6163	15.7725	27.8407	20.1441	18.3714	17.6433	20.2722	24.0542	25.4246	21.6354	21.9232	22.1425	17.7628	21.3718	14.7321	19.0265	16.6074	16.069	18.7533	14.7838	17.2974	17.4692	14.5378	14.2796	14.8139	17.8708	15.2218	15.6579
12.954	768.549	0.304	0.3362	0.3401	0.2673	0.2923	0.2725	0.2614	0.279	0.2941	0.297	0.2945	0.2153	0.4341	0.3388	0.3338	0.3431	0.2349	0.2743	0.3086	0.3117	0.3031	0.3074	0.3656	0.2882	0.3074	0.2933	0.2573	0.2847	0.2994	0.3024	0.2745	0.2288	0.1943	0.2539	0.2355	0.2422
12.9621	842.564	1.0387	0.7963	1.0737	1.1148	1.1137	1.1801	1.327	1.3328	1.1221	1.1334	0.8541	0.7826	1.0927	1.0268	1.0998	1.121	0.7677	0.712	0.9321	0.9414	0.9973	0.7968	1.0839	1.1035	1.1268	1.1771	1.1979	1.2032	1.0803	1.0911	0.9113	1.0885	1.013	1.1475	1.0297	1.0592
12.9694	874.551	0.906	1.0023	0.8882	0.8589	0.8743	0.8635	0.8376	0.9392	0.8963	0.9052	0.9693	0.9864	0.7974	0.8828	0.9124	1.0195	1.0012	0.8767	0.9307	0.94	0.9266	1.0033	0.8698	0.8736	0.8972	0.9121	0.8879	0.9463	0.9099	0.919	0.7502	0.6453	0.7872	0.8331	0.7464	0.7678
12.9737	918.578	0.3599	0.4282	0.4995	0.4323	0.4615	0.3635	0.4242	0.4466	0.427	0.4312	0.4883	0.6087	0.4564	0.4329	0.5101	0.5425	0.4907	0.3889	0.4898	0.4947	0.3941	0.4759	0.4911	0.4368	0.4809	0.4129	0.4455	0.4426	0.4452	0.4496	0.4739	0.6097	0.5355	0.4563	0.5137	0.5284
13.0133	872.551	0.2144	0.2226	0.219	0.2433	0.2362	0.2322	0.2053	0.3217	0.2368	0.2392	0.3844	0.3326	0.3165	0.3967	0.4242	0.5246	0.444	0.3811	0.4005	0.4045	0.2584	0.2515	0.2447	0.2849	0.2882	0.3092	0.2683	0.3453	0.2795	0.2823	0.76	0.7611	0.7614	0.8008	0.7631	0.785
13.015	968.595	0.2701	0.2368	0.2149	0.3269	0.2813	0.2476	0.2867	0.2669	0.2664	0.2691	0.3131	0.2032	0.197	0.2032	0.2895	0.2209	0.2856	0.1924	0.2381	0.2405	0.2823	0.2295	0.2115	0.2986	0.2876	0.2433	0.2893	0.254	0.2607	0.2633	0.2627	0.2493	0.2727	0.2647	0.2597	0.2672
13.0153	856.58	9.5298	8.0912	10.0514	8.872	11.5913	10.2796	9.517	10.2478	9.7725	9.8702	11.1882	9.0905	9.1789	8.8453	10.6443	11.9259	11.0547	10.0085	10.242	10.3445	9.9967	8.384	9.8818	8.9539	11.5213	10.8045	10.0064	10.4412	9.9455	10.0444	8.8403	9.2742	9.4346	9.4611	9.16	9.4225
13.0189	834.598	6.4481	5.5096	6.3742	7.3644	6.485	6.8601	5.5134	6.0142	6.3211	6.3843	5.8499	4.9554	4.8615	5.1488	5.7443	7.0862	4.8811	5.6863	5.5267	5.582	6.3296	5.3972	6.0244	6.8731	6.3915	6.9878	5.4084	6.0785	6.1555	6.2166	4.9586	5.3389	4.9908	4.3946	4.8715	5.0111
13.0364	766.572	1.0062	1.5682	1.5395	1.5246	1.336	1.2415	1.2057	1.4228	1.3556	1.3691	1.4277	1.1469	1.4788	1.1971	1.1952	1.3222	1.3451	1.1173	1.2788	1.2916	1.1177	1.4697	1.5319	1.4563	1.3198	1.2748	1.2536	1.3782	1.3437	1.357	1.1281	1.0925	1.1711	1.0207	1.0921	1.1234
13.066	818.564	5.2386	5.3732	5.7517	7.4928	6.6635	6.9593	7.0255	4.6728	6.1472	6.2086	4.5478	4.2591	5.4266	5.4784	4.7491	5.7671	4.6259	5.0515	4.9882	5.0381	5.0906	5.1188	5.6987	7.0541	6.2705	6.7262	6.485	4.889	5.8884	5.9469	4.9956	5.059	5.3434	5.3182	5.1273	5.2742
13.0664	886.55	0.4334	0.4062	0.3092	0.577	0.3851	0.4502	0.4097	0.3026	0.4092	0.4133	0.2681	0.2448	0.2635	0.2701	0.2992	0.3525	0.3289	0.2148	0.2802	0.283	0.3938	0.3675	0.2992	0.5045	0.3688	0.4299	0.3933	0.2871	0.3789	0.3826	0.2986	0.2501	0.2715	0.2565	0.2665	0.2741
13.0699	796.582	3.9005	3.4665	3.8731	5.0519	4.6822	4.5629	4.6602	3.0354	4.1541	4.1956	2.8117	2.6289	3.2581	3.3576	2.7414	3.3865	2.9163	3.0766	3.0221	3.0524	3.6453	3.2723	3.7374	4.6704	4.2527	4.3094	4.2629	3.1221	3.8911	3.9297	2.8598	3.1297	3.3565	3.2095	3.1075	3.1965
13.0728	431.387	0.4755	0.5367	0.5136	0.4865	0.4275	0.3899	0.4351	0.5712	0.4795	0.4843	0.4012	0.409	0.5087	0.4961	0.3919	0.4707	0.3959	0.3783	0.4315	0.4358	0.4591	0.5071	0.515	0.4938	0.4247	0.4145	0.4295	0.5348	0.47	0.4747	0.2943	0.2502	0.2994	0.2755	0.2771	0.285
13.1335	742.572	0.2779	0.3154	0.2933	0.3015	0.2522	0.3022	0.1801	0.2439	0.2708	0.2735	0.2762	0.2406	0.2437	0.26	0.198	0.2656	0.242	0.2618	0.2485	0.251	0.2789	0.2981	0.2823	0.2939	0.242	0.2959	0.1977	0.2547	0.2667	0.2693	0.2206	0.2522	0.2068	0.2284	0.2247	0.2312
13.1395	764.552	0.4277	0.4319	0.378	0.3015	0.3185	0.2813	0.2999	0.313	0.344	0.3474	0.538	0.3271	0.4542	0.4053	0.3718	0.469	0.3982	0.3854	0.4186	0.4228	0.4577	0.4076	0.3992	0.331	0.337	0.3321	0.328	0.3398	0.3648	0.3684	0.248	0.3447	0.2839	0.2984	0.2908	0.2991
13.1499	794.565	3.2777	4.2069	3.2908	3.1351	3.2693	2.444	2.6852	2.4397	3.0936	3.1245	4.2023	2.8683	4.3269	3.6973	2.8944	4.1414	3.3296	3.8407	3.6626	3.6992	3.5277	3.8899	3.5691	3.3098	3.2218	2.9019	2.877	2.8685	3.2546	3.287	2.2561	2.5172	2.5441	2.711	2.482	2.5531
13.1556	772.582	2.1455	2.548	2.202	2.1584	1.7585	1.7288	1.7302	2.1246	2.0495	2.07	2.6228	1.8412	2.2429	2.0937	1.8453	2.3515	2.22	2.4294	2.2059	2.2279	2.2769	2.3823	2.2234	2.1635	1.8072	1.9053	1.8728	2.2577	2.1004	2.1213	1.5907	1.6877	1.739	1.6209	1.643	1.6901
13.189	279.158	0.3998	0.4403	0.4599	0.4267	0.403	0.5916	0.4402	0.4652	0.4533	0.4579	0.2539	0.35	0.4965	0.5217	0.4207	0.3333	0.3759	0.3979	0.3937	0.3977	0.365	0.4197	0.4715	0.4552	0.4136	0.5317	0.4283	0.4592	0.4408	0.4452	0.3394	0.2703	0.2146	0.264	0.2694	0.2771
13.1892	301.14	2.0805	2.1281	1.7937	1.4453	1.7237	1.8072	2.0609	1.8022	1.8552	1.8738	1.6664	2.1449	1.8123	1.535	1.9298	1.7145	1.3858	1.4707	1.7074	1.7245	1.9864	2.143	1.8075	1.4826	1.8026	1.802	1.9097	1.7602	1.8282	1.8463	1.2226	1.394	1.7533	1.6308	1.4852	1.5277
13.1908	840.585	1.1172	1.2142	1.1272	1.2015	1.2423	1.0702	1.0087	0.9603	1.1177	1.1289	1.3631	1.0046	1.1988	1.0824	1.0853	1.2546	1.2689	1.1856	1.1804	1.1922	1.1849	1.1673	1.151	1.1831	1.2205	1.1282	1.0854	1.0434	1.1398	1.1511	0.8354	0.9357	0.976	0.8549	0.8915	0.917
13.2002	790.57	4.8234	5.413	5.4479	4.1759	5.0276	4.8437	4.2073	5.5042	4.9304	4.9797	5.2731	4.2715	6.3298	5.8476	4.9893	5.7798	5.2504	5.3026	5.3805	5.4343	4.9613	5.1518	5.6981	4.6439	5.0932	5.1319	4.5163	5.5889	5.0716	5.122	4.2272	4.2866	4.4406	4.2319	4.2536	4.3755
13.2011	789.618	0.1832	0.2273	0.2117	0.2923	0.2583	0.296	0.3319	0.2452	0.2557	0.2583	0.2285	0.3668	0.3357	0.2611	0.2776	0.3949	0.3676	0.2659	0.3123	0.3154	0.1956	0.2637	0.2441	0.2873	0.2671	0.3243	0.3444	0.2568	0.2714	0.2741	0.3241	0.3195	0.3216	0.3332	0.3214	0.3306
13.202	561.448	0.2671	0.2418	0.2629	0.2973	0.2605	0.2706	0.2908	0.3025	0.2742	0.2769	0.3281	0.2869	0.2471	0.345	0.2668	0.3454	0.3305	0.2805	0.3038	0.3068	0.2839	0.2544	0.2602	0.3124	0.266	0.2924	0.3039	0.3043	0.2832	0.286	0.2499	0.3493	0.2986	0.3187	0.3011	0.3097
13.2036	768.588	3.6859	4.1353	3.9299	3.0139	3.8767	3.7131	3.1368	4.2243	3.7145	3.7516	3.3939	2.9572	3.8725	3.7086	3.1581	3.8472	3.3266	3.4534	3.4647	3.4993	3.6308	3.8585	3.9353	3.2212	3.7498	3.7852	3.2172	4.1275	3.672	3.7085	2.9131	3.1545	3.2722	3.066	3.0704	3.1584
13.2137	695.484	0.3268	0.2502	0.3082	0.4078	0.316	0.2845	0.4353	0.2599	0.3236	0.3268	0.3932	0.4042	0.3553	0.4195	0.4762	0.4106	0.406	0.367	0.404	0.408	0.3452	0.2903	0.3217	0.4149	0.362	0.3196	0.4323	0.2945	0.3457	0.3491	0.4113	0.4678	0.4124	0.3492	0.4061	0.4177
13.223	549.447	0.3243	0.288	0.282	0.3495	0.375	0.462	0.4616	0.3958	0.3673	0.3709	0.3724	0.4559	0.3507	0.3777	0.5417	0.3899	0.4755	0.3877	0.4189	0.4231	0.3381	0.3318	0.3008	0.3602	0.4236	0.4483	0.4699	0.4036	0.3824	0.3862	0.3634	0.3464	0.4657	0.4437	0.4008	0.4122
13.2243	603.541	0.4584	0.3558	0.3026	0.352	0.385	0.3891	0.4966	0.3467	0.3858	0.3896	0.5631	0.5216	0.4182	0.4458	0.5306	0.4682	0.5346	0.3313	0.4767	0.4814	0.4872	0.3994	0.3333	0.3794	0.4283	0.4132	0.5114	0.3513	0.4109	0.415	0.4466	0.4299	0.4862	0.4569	0.4504	0.4633
13.2836	744.589	0.3395	0.417	0.3688	0.2761	0.293	0.3294	0.2547	0.2745	0.3191	0.3223	0.3821	0.3531	0.3389	0.3808	0.2901	0.4174	0.3891	0.3108	0.3578	0.3614	0.352	0.403	0.3631	0.3056	0.2966	0.3552	0.2916	0.2909	0.3307	0.334	0.2689	0.3281	0.3143	0.3411	0.31	0.3189
13.2847	782.565	5.0067	6.3863	4.4621	4.9621	4.9974	4.2814	3.6118	5.606	4.9142	4.9634	6.945	5.5797	6.9966	7.9435	4.4146	7.6075	6.9983	6.6565	6.6427	6.7091	5.5215	6.2146	5.1247	5.772	4.9223	5.1736	4.5126	6.0219	5.3785	5.4319	4.6763	5.125	5.3845	5.6684	5.1614	5.3093
13.2862	760.583	3.9075	4.6968	4.2858	3.7305	3.0721	3.512	2.5416	3.6563	3.6753	3.7121	4.4844	3.2138	4.5144	4.2522	3.6702	4.4928	3.7413	3.926	4.0369	4.0773	4.0729	4.3458	4.3652	3.9008	3.2722	3.798	2.8736	3.8185	3.7872	3.8248	2.812	3.1614	3.0795	1.9746	2.7293	2.8075
13.2915	834.598	7.1475	7.0746	7.8038	6.6452	8.5647	8.9447	8.6174	10.0054	8.1004	8.1814	5.4311	4.8305	6.8766	6.5467	5.8917	6.4388	5.156	5.4861	5.8322	5.8905	6.7502	6.5433	7.6091	6.6865	8.0049	8.3967	7.8223	9.0692	7.5721	7.6474	5.9876	5.8958	6.0708	6.223	5.9839	6.1553
13.2937	856.58	12.7094	12.5878	13.5171	16.3574	14.4688	13.4057	16.2304	15.9542	14.4039	14.5479	12.723	9.8566	14.0506	14.5472	13.2031	15.4099	11.6258	11.9348	12.9189	13.0481	12.777	11.9611	13.7201	16.0594	14.3599	14.0538	15.2214	15.298	14.1086	14.2488	12.6127	12.7959	13.3951	13.0283	12.8284	13.196
13.2942	872.553	0.2224	0.2064	0.2991	0.3338	0.3063	0.3614	0.3279	0.2829	0.2925	0.2955	0.4644	0.3637	0.5362	0.5411	0.6036	0.6125	0.4522	0.48	0.5067	0.5118	0.2846	0.2472	0.3605	0.39	0.3874	0.4291	0.363	0.3417	0.3483	0.3518	1.2344	1.2248	1.2531	1.2743	1.2342	1.2695
13.2991	968.596	0.3402	0.213	0.3275	0.3546	0.3521	0.3858	0.4334	0.362	0.3461	0.3495	0.2967	0.281	0.313	0.3675	0.3364	0.4452	0.3164	0.2229	0.3224	0.3256	0.3309	0.2312	0.3255	0.3614	0.3533	0.4049	0.408	0.3345	0.342	0.3454	0.3145	0.333	0.3568	0.3437	0.3336	0.3432
13.3231	794.603	3.2133	3.8032	3.5496	3.4211	3.2842	2.6344	2.8577	3.2226	3.2483	3.2807	3.3046	2.9644	3.2706	3.2021	3.1819	3.687	3.7064	3.1311	3.306	3.3391	3.2526	3.6104	3.4971	3.3995	3.3071	2.9298	3.1034	3.2791	3.2809	3.3135	2.5107	2.5548	2.7101	2.6608	2.583	2.657
13.3234	816.586	4.5079	5.0666	4.8467	4.1198	4.5043	4.5649	4.4229	4.9726	4.6257	4.672	6.2445	4.8286	5.8797	5.4318	6.0387	6.0666	6.2546	5.5531	5.7872	5.8451	4.9692	5.0318	5.132	4.4956	4.967	4.9946	4.9353	5.2493	4.945	4.9942	4.0034	4.2539	4.4627	4.1478	4.1748	4.2944
13.3465	444.417	0.167	0.1763	0.1416	0.163	0.1602	0.156	0.1434	0.1755	0.1604	0.162	0.2274	0.1733	0.1675	0.1447	0.238	0.1857	0.2079	0.147	0.1864	0.1883	0.1831	0.1764	0.1489	0.16	0.1826	0.1652	0.1613	0.1724	0.1679	0.1695	0.175	0.2217	0.2357	0.2216	0.2114	0.2174
13.3519	449.374	1.7822	1.9664	1.7823	1.81	1.7759	1.9184	2.186	2.5464	1.971	1.9907	3.4168	3.1437	2.8742	3.1127	3.4618	3.1511	3.5018	2.5517	3.1517	3.1832	2.204	2.2735	2.067	2.1603	2.2367	2.2524	2.544	2.6115	2.2804	2.303	2.8261	2.7702	3.0606	2.8275	2.8424	2.9238
13.3535	427.392	0.3782	0.3931	0.3784	0.4082	0.3111	0.3735	0.4072	0.3452	0.3744	0.3781	0.551	0.4608	0.4989	0.3434	0.5025	0.4985	0.535	0.4445	0.4793	0.4841	0.4237	0.4122	0.4107	0.3958	0.3651	0.4092	0.444	0.3799	0.403	0.407	0.5615	0.5417	0.5797	0.5024	0.5409	0.5564
13.3547	569.38	0.2187	0.2342	0.2195	0.2878	0.2252	0.2805	0.2595	0.2323	0.2447	0.2472	0.4105	0.3857	0.3972	0.3698	0.3701	0.4355	0.3983	0.3209	0.386	0.3899	0.2682	0.2736	0.2655	0.3116	0.2659	0.3229	0.2976	0.2614	0.2818	0.2846	0.2732	0.3823	0.4206	0.3593	0.3553	0.3654
13.3596	409.381	0.3013	0.3153	0.3233	0.3696	0.3307	0.3677	0.3536	0.2916	0.3316	0.335	0.5135	0.3955	0.4498	0.4291	0.4393	0.4949	0.389	0.3812	0.4365	0.4409	0.3564	0.3371	0.3569	0.3885	0.3636	0.4039	0.3662	0.3224	0.36	0.3636	0.4706	0.4924	0.4571	0.4609	0.4655	0.4789
13.3606	509.356	0.4048	0.4472	0.4125	0.3979	0.3493	0.3849	0.3366	0.4434	0.3971	0.401	0.371	0.3906	0.3402	0.3848	0.3863	0.3715	0.4843	0.2662	0.3744	0.3781	0.3983	0.4351	0.3963	0.3985	0.3641	0.3854	0.3777	0.408	0.3935	0.3975	0.3937	0.4008	0.4324	0.3857	0.3991	0.4106
13.3715	587.463	0.1377	0.1681	0.1834	0.1506	0.1667	0.1366	0.1821	0.1924	0.1647	0.1663	0.287	0.324	0.2355	0.2109	0.2631	0.3145	0.2392	0.2524	0.2658	0.2685	0.1761	0.2083	0.1975	0.1675	0.194	0.1834	0.1985	0.213	0.1912	0.1931	0.2626	0.1844	0.1747	0.2178	0.2078	0.2137
13.3829	369.348	0.6384	0.6307	0.7478	0.7251	0.6616	0.6682	0.6665	0.6448	0.6729	0.6796	0.8119	0.7695	0.8632	0.7962	0.7119	0.8701	0.7696	0.5789	0.7714	0.7791	0.6854	0.6689	0.7807	0.7505	0.6845	0.7265	0.6996	0.6436	0.7015	0.7085	0.5862	0.527	0.6426	0.6038	0.584	0.6007
13.3917	770.603	0.2687	0.3022	0.3205	0.2556	0.1901	0.2228	0.1767	0.2686	0.2507	0.2532	0.3373	0.2527	0.3634	0.2944	0.2021	0.3376	0.3726	0.3033	0.3079	0.311	0.2874	0.2912	0.333	0.2681	0.196	0.2544	0.2285	0.2844	0.2665	0.2692	0.1867	0.1559	0.2007	0.1844	0.1801	0.1853
13.419	832.581	27.582	27.7051	26.8372	27.3477	27.544	27.4147	25.0697	26.4523	26.9941	27.264	28.7565	25.6535	29.7548	28.7225	30.0644	31.088	29.8994	26.8057	28.8431	29.1315	28.0179	27.3256	27.7095	27.9718	28.6062	28.6315	26.5576	27.2064	27.6116	27.886	27.7908	29.2444	29.6508	29.5319	28.7639	29.5881
13.4214	900.568	1.093	1.1298	1.1014	1.0037	1.0294	1.0429	1.1208	1.0752	1.0745	1.0853	1.0045	0.8633	0.8628	0.8601	1.0818	1.0886	0.9259	0.8565	0.9429	0.9524	1.0762	1.0682	1.0467	0.9771	1.0583	1.0652	1.0825	1.0447	1.0472	1.0576	1.0174	0.9679	1.1085	0.9505	1.001	1.0296
13.4223	810.599	21.8418	22.4836	21.8285	24.332	23.1229	23.7653	22.322	18.4557	22.269	22.4917	16.4081	13.1327	18.8261	15.7594	16.8955	19.4007	16.8717	17.4418	16.842	17.0104	20.58	20.2349	21.1806	22.3893	21.8662	22.8944	21.1594	18.6509	21.021	21.23	16.2331	16.8548	17.2611	17.1792	16.7132	17.1921
13.4295	848.554	0.439	0.429	0.4583	0.459	0.4691	0.4547	0.479	0.54	0.466	0.4707	1.0608	0.8136	0.8984	0.9513	1.1561	1.1121	1.0479	1.0969	1.0171	1.0273	0.5982	0.5283	0.5718	0.5891	0.653	0.627	0.629	0.6997	0.6079	0.614	2.6007	2.6138	2.7933	2.6853	2.6465	2.7224
13.4493	944.595	0.4643	0.4375	0.438	0.49	0.4849	0.4317	0.5934	0.3665	0.4633	0.4679	0.5025	0.4352	0.4101	0.43	0.5286	0.4823	0.5443	0.4114	0.4681	0.4727	0.4763	0.4391	0.4332	0.4796	0.5034	0.449	0.5869	0.3874	0.4671	0.4717	0.575	0.6183	0.7163	0.6136	0.6245	0.6424
13.4593	917.556	0.2845	0.3686	0.2634	0.2637	0.3265	0.3008	0.2618	0.2465	0.2895	0.2924	0.258	0.3229	0.2638	0.274	0.3801	0.3522	0.3573	0.2046	0.3016	0.3046	0.2792	0.3589	0.2648	0.269	0.3452	0.317	0.2888	0.2417	0.2942	0.2971	0.3008	0.2956	0.288	0.3506	0.3057	0.3144
13.4681	842.599	0.3	0.2899	0.2089	0.2103	0.3047	0.1912	0.2842	0.25	0.2549	0.2574	0.4274	0.3071	0.3018	0.2628	0.3696	0.3051	0.2893	0.3021	0.3207	0.3239	0.3337	0.2957	0.2334	0.2258	0.326	0.2222	0.2884	0.2699	0.2729	0.2756	0.2278	0.2779	0.2326	0.2582	0.2466	0.2537
13.522	876.568	0.8076	0.9929	0.9818	0.9343	0.9431	0.8778	0.802	1.0184	0.9197	0.9289	0.9262	0.8081	0.8247	0.8587	0.8439	1.0385	0.947	0.8297	0.8846	0.8934	0.8416	0.9512	0.9471	0.9244	0.9317	0.9278	0.8472	0.9943	0.916	0.9251	0.7906	0.8845	0.9127	0.8523	0.8514	0.8758
13.5236	786.599	12.1526	14.9061	12.0716	12.8254	11.7879	9.4131	9.3326	10.1289	11.5773	11.693	11.7522	9.3458	12.5607	11.3861	9.615	12.0578	10.4157	11.6571	11.0988	11.2098	12.1129	13.5767	12.2561	12.5866	11.4052	10.1838	9.7041	10.7833	11.5207	11.6352	8.2661	7.4476	8.6613	8.9842	8.2564	8.493
13.5278	808.58	17.0502	15.5424	18.278	18.2313	17.0277	15.3383	14.1358	20.8812	17.0606	17.2312	23.35	18.3341	21.2605	20.4109	18.7579	22.4572	21.6727	20.9893	20.9041	21.1131	18.7272	16.325	19.1235	18.9694	17.7286	17.3109	16.2027	21.4316	18.127	18.3071	16.2172	16.7343	16.7681	16.5616	16.4046	16.8747
13.5461	836.614	1.9655	2.2207	2.2874	2.6249	2.5678	2.2221	2.0486	2.2437	2.2726	2.2953	1.8719	1.402	2.1315	2.0829	1.8177	2.1829	1.6583	1.7672	1.8643	1.8829	1.9518	2.0251	2.2596	2.5129	2.4132	2.2348	1.9699	2.1747	2.182	2.2037	1.6122	1.793	1.8497	1.8141	1.7496	1.7997
13.5529	858.596	3.5864	3.5819	3.8879	4.4223	3.8685	3.5782	3.5587	3.851	3.7919	3.8298	3.6386	2.8913	4.3503	4.1367	3.5862	3.9309	3.4625	3.5631	3.695	3.7319	3.6177	3.4254	4.0243	4.3937	3.8538	3.7047	3.5705	3.8717	3.7885	3.8261	3.3112	3.4071	3.7473	3.6051	3.4825	3.5823
13.5601	838.623	0.4757	0.3981	0.4988	0.5128	0.5117	0.4801	0.441	0.3831	0.4627	0.4673	0.4091	0.2925	0.4437	0.4126	0.3714	0.3935	0.4529	0.3975	0.3967	0.4006	0.4613	0.3734	0.4874	0.4924	0.4832	0.4629	0.4485	0.3965	0.4485	0.453	0.4584	0.3475	0.3633	0.3661	0.38	0.3909
13.5984	575.464	0.1907	0.2163	0.1788	0.2319	0.2119	0.2211	0.258	0.2079	0.2146	0.2167	0.3746	0.2447	0.4296	0.3605	0.3456	0.2776	0.3322	0.2418	0.3258	0.3291	0.2381	0.2246	0.243	0.267	0.2495	0.2378	0.2796	0.222	0.2439	0.2463	0.2803	0.3579	0.2989	0.2843	0.3023	0.311
13.6211	559.515	0.7144	0.6414	0.669	0.6804	0.6742	0.7019	0.7249	0.6192	0.6782	0.685	0.52	0.8122	0.5382	0.6378	0.7246	0.7151	0.6761	0.5829	0.6509	0.6574	0.6689	0.6877	0.6393	0.6763	0.6973	0.7124	0.7198	0.6252	0.675	0.6818	0.6433	0.6472	0.6083	0.584	0.6145	0.6321
13.6213	537.534	0.2999	0.3573	0.344	0.2939	0.2785	0.3016	0.3335	0.3277	0.3171	0.3202	0.2997	0.2461	0.2092	0.2142	0.2831	0.2067	0.2795	0.1835	0.2403	0.2427	0.3014	0.331	0.3117	0.2765	0.2839	0.2805	0.3231	0.298	0.2994	0.3024	0.2152	0.2264	0.2006	0.2471	0.2201	0.2264
13.6236	985.708	0.1785	0.2251	0.2318	0.2381	0.1975	0.2105	0.2193	0.1919	0.2116	0.2137	0.2387	0.239	0.2622	0.2444	0.2839	0.2088	0.2079	0.1945	0.2349	0.2373	0.1946	0.2297	0.2406	0.2421	0.2227	0.2122	0.2186	0.1974	0.2187	0.2208	0.1602	0.2122	0.253	0.2184	0.2088	0.2148
13.6743	963.589	0.1972	0.1642	0.2349	0.2447	0.1792	0.1531	0.1586	0.1594	0.1864	0.1883	0.1957	0.1613	0.1306	0.1582	0.2071	0.1179	0.1867	0.1447	0.1628	0.1644	0.1978	0.1643	0.2097	0.2251	0.1891	0.1457	0.1674	0.1595	0.1815	0.1833	0.1889	0.1896	0.227	0.207	0.2011	0.2069
13.6761	685.434	1.6008	1.724	1.5086	1.933	1.2599	1.3961	1.505	1.2723	1.525	1.5402	1.8531	1.4092	1.382	1.5873	1.7144	1.5669	1.557	1.3153	1.5482	1.5636	1.6726	1.6531	1.4842	1.8642	1.3958	1.4539	1.5336	1.3154	1.5393	1.5546	1.5545	1.5748	1.674	1.6767	1.6038	1.6498
